# Supplementary material for: Characterization of the distribution and dynamics of chromatin states in the C. elegans germline reveals substantial H3K4me3 remodeling during oogenesis
Source: Genome Res. 2024 Jan;34(1):57–69. doi: 10.1101/gr.278247.123 (PMC10903938; doi:10.1101/gr.278247.123)
Supplement: Supplement 3 [file Supplemental_File_S2.xlsx]

## Sheet: cluster1_genes
seqnames	geneStart	geneEnd	geneLength	geneStrand	geneId	transcriptId	ENSEMBL	SYMBOL	GENENAME	WormBase.Gene.ID	Public.Name	Species	Biotype	Sequence.Name	Other.Name	Transcript	Operon	WormPep	Protein.Domain	UniProt	Reference.UniProt.ID	TreeFam	RefSeq_mRNA	RefSeq_protein	Genetic.Map.Position	RNAi.Clone	RNAi.Phenotype.Observed	Allele.Phenotype.Observed	Coding_exon.Non_silent.Allele	Interacting.Gene	Expr_pattern.Tissue	Genomic.Study.Tissue	Expr_pattern.LifeStage	Genomic.Study.LifeStage	Disease.Info	Human.Ortholog	Gene.Ontology.Association	Concise.Description	Automated.Description	Expression.Cluster.Summary	Reference
chrII	11889830	11889998	169	2	13187308	NR_051765	WBGene00201365	ZK930.12	ncRNA	WBGene00201365	ZK930.12	Caenorhabditis elegans	ncRNA_gene	ZK930.12	CELE_ZK930.12	ZK930.12	N.A.	N.A.	N.A.	N.A.	N.A.	N.A.	NR_051765.1	N.A.	II 4.133052	N.A.	N.A.	N.A.	N.A.	N.A.	N.A.	N.A.	N.A.	N.A.	N.A.	N.A.	N.A.	N.A.	N.A.	N.A.	N.A.
chrIV	4446236	4446708	473	1	177212	NM_068168	WBGene00019947	htz-1	Histone H2A.V	WBGene00019947	htz-1	Caenorhabditis elegans	protein_coding_gene	R08C7.3	CELE_R08C7.3	R08C7.3.1	CEOP4620	CE07426	CE07426|HMMPANTHER:PTHR23430|HMMPANTHER:PTHR23430:SF280|PRINTS:PR00620|SCANPROSITE:PS00046|SMART:SM00414|PFAM:PF00125|PFAM:PF16211|SUPERFAMILY:SSF47113|INTERPRO:IPR002119|INTERPRO:IPR007125|INTERPRO:IPR009072|INTERPRO:IPR032454	Q27511	Q27511	TF354232	NM_068168.9	NP_500569.1	IV 0.28 +/- 0.01	mv_R08C7.3, cenix:46-e11, sjj_R08C7.3|IV-2C22	ectopic expression transgene, embryonic lethal, exploded through vulva, high incidence male progeny, L1 lethal, larval arrest, larval lethal, late embryonic arrest, late larval arrest, lethal, locomotion variant, multivulva, no pharynx, organism morphology variant, pharynx unattached, protruding vulva, reduced brood size, RNAi resistant, sick, slow growth, sterile, transgene expression variant	Dosage compensation complex assembly variant, lethal, sterile	tm2469|Deletion|Frameshift, gk200133|Substitution|Missense, gk375145|Substitution|Missense, gk589980|Substitution|Missense, gk898742|Substitution|Missense	bet-1|Regulatory, cdc-42|Physical, csr-1|Physical, dlg-1|Physical, hmg-4|Physical, hpl-2|Genetic, let-413|Physical, lgl-1|Physical, lin-15B|Genetic, lin-35|Genetic, lin-37|Genetic, myo-2|Regulatory, myrf-1|Physical, myrf-2|Physical, mys-1|Genetic, nap-1|Physical, nrde-2|Physical, pan-1|Physical, par-3|Physical, pid-3|Physical, pry-1|Genetic, R07B1.9|Regulatory, sdc-2|Regulatory, sip-1|Physical, s…	Cell, distal tip cell, somatic gonad	ABalaaaarl, ABalaaaarr, ABalaapppa, ABalaapppp, ABalaappppa, ABalapaaaa, ABalapaapa, ABalapaapp, ABalapaappa, ABalapapap, ABalapapapa, ABalapappaa, ABalappaap, ABalappapa, ABalapppap, ABalapppapa, ABalappppa, ABalappppaa, ABalpapaap, ABalpappaa, ABalppappp, ABalppapppa, ABalpppappp, ABalppppaa, ABalppppapa, ABalpppppa, ABalpppppp, ABaraapapaa, ABaraapapp, ABaraapppaa, ABaraapppp, ABarapapaa, ABar…	adult Ce, embryo Ce, L1 larva Ce, L2 larva Ce, L3 larva Ce, L4 larva Ce	1-cell embryo Ce, 1-day post-L4 adult hermaphrodite Ce, 10-days post-L4 adult hermaphrodite Ce, 2-days post-L4 adult hermaphrodite Ce, 20-days post-L4 adult hermaphrodite Ce, 3-days post-L4 adult hermaphrodite Ce, 3-fold embryo Ce, 5-days post-L4 adult hermaphrodite Ce, 6-days post-L4 adult hermaphrodite Ce, 7-10 days post-L4 adult hermaphrodite Ce, adult Ce, adult hermaphrodite Ce, adult male Ce…	N.A.	HGNC:4741|EnsEMBL-Compara;Hieranoid;SonicParanoid;Inparanoid;OMA;OrthoInspector, HGNC:20664|EnsEMBL-Compara;Hieranoid;Panther;OrthoFinder;SonicParanoid;PhylomeDB;Inparanoid;OMA;OrthoInspector	chromatin, chromosome, condensed chromosome, DNA binding, negative regulation of cell fate specification, negative regulation of transcription, DNA-templated, nucleosome, nucleus, protein heterodimerization activity, structural constituent of chromatin	htz-1 encodes the C. elegans ortholog of the H2A.Z histone variant\; htz-1 is an essential gene and during development, HTZ-1 functions with the PHA-4\/FoxA transcription factor and the MYS-1\/TIP60-SSL-1\/SWR1 remodeling complex to regulate gene expression during pharyngeal (foregut) organogenesis\; a YFP::HTZ-1 fusion protein localizes to pharyngeal gene promoters at the onset of transcription,…	Predicted to enable DNA binding activity. Involved in negative regulation of cell fate specification and negative regulation of transcription, DNA-templated. Located in chromatin\; condensed chromosome\; and nucleus. Expressed in several structures, including distal tip cell and somatic gonad. Is an ortholog of human H2AZ2 (H2A.Z variant histone 2).	Enriched in germ line, somatic gonad precursor, ABarpaaa, ABplapaaaa, ABprapaaaa, ABpraaapaa, ABalppppaa, ABpraapappp, ABplaapappp, ABpraaaappp, ABalpppappp, ABalapaaaa, ABalappapa, body wall muscle cell, AQR, PVR, PQR, IL2 neuron, IL1 neuron, CEP, ADE, PDE, BAG, FLP, OLL, OLQ, PHA, PHB, GLRVR, GLRVL, GLRR, GLRL, GLRDR, GLRDL, ABarapapaa, ABalpappaa, ABalapaappa, ABarapppppa, ABalppapppa, ABalapp…	WBPaper00019433|pmid N.A., WBPaper00025530|pmid N.A., WBPaper00027634|pmid16710447, WBPaper00028549|pmid17009877, WBPaper00029033|pmid18050503, WBPaper00030451|pmid N.A., WBPaper00030511|pmid N.A., WBPaper00032180|pmid18787694, WBPaper00034483|pmid N.A., WBPaper00034938|pmid N.A., WBPaper00035328|pmid19851459, WBPaper00036500|pmid N.A., WBPaper00038491|pmid21647448, WBPaper00039481|pmid N.A., WBP…
chrII	14250718	14251067	350	1	175081	NM_064569	WBGene00001971	hmg-1.1	HMG box domain-containing protein	WBGene00001971	hmg-1.1	Caenorhabditis elegans	protein_coding_gene	Y48B6A.14	CELE_Y48B6A.14	Y48B6A.14.1	N.A.	CE29377	CE29377|PhosphoPep:Y48B6A.14|HMMPANTHER:PTHR48112:SF1|HMMPANTHER:PTHR48112|PFSCAN:PS50118|SMART:SM00398|PFAM:PF00505|SUPERFAMILY:SSF47095|INTERPRO:IPR009071|INTERPRO:IPR036910	G5EFV4	G5EFV4	N.A.	NM_001383989.2	NP_001370073.1	II 22.90 +/- 0.00	cenix:169-a7, mv_AAC78598, sjj_Y48B6A.14|II-9G13	N.A.	N.A.	gk461321|Substitution|Missense, gk532737|Substitution|Missense, gk635207|Substitution|Missense	cdc-42|Physical, daf-16|Physical, dlg-1|Physical, F52B11.5|Physical, lab-1|Physical, let-413|Physical, lgl-1|Physical, mafr-1|Physical, met-2|Physical, myrf-1|Physical, myrf-2|Physical, par-3|Physical, pid-3|Physical, sip-1|Physical, skn-1|Physical, sma-3|Physical, smo-1|Physical, spe-39|Physical, tofu-6|Physical, vps-45|Physical	Cell, head neuron, pharynx, tail neuron, ventral nerve cord, vulva	ABalaaaala, ABalaaaarl, ABalaaaarr, ABalaapaaa, ABalaapppa, ABalaapppp, ABalaappppa, ABalapaaaa, ABalapaapa, ABalapaapp, ABalapaappa, ABalapapap, ABalapapapa, ABalapappaa, ABalappaap, ABalappapa, ABalapppaa, ABalapppap, ABalapppapa, ABalappppa, ABalappppaa, ABalpapaap, ABalppappa, ABalppappp, ABalppapppa, ABalpppapa, ABalppppaa, ABalppppapa, ABalpppppa, ABalpppppp, ABarappaap, ABarappppa, ABarapp…	adult Ce, elongating embryo Ce, embryo Ce, fully-elongated embryo Ce, L1 larva Ce, L2 larva Ce, L3 larva Ce, L4 larva Ce	1-cell embryo Ce, 1-day post-L4 adult hermaphrodite Ce, 11-15 days post-L4 adult hermaphrodite Ce, 2-days post-L4 adult hermaphrodite Ce, 3-days post-L4 adult hermaphrodite Ce, 5-days post-L4 adult hermaphrodite Ce, 6-days post-L4 adult hermaphrodite Ce, 7-10 days post-L4 adult hermaphrodite Ce, adult Ce, adult hermaphrodite Ce, adult male Ce, all stages Ce, dauer larva Ce, embryo Ce, L1 larva Ce…	N.A.	N.A.	DNA binding, DNA binding, bending, nucleus, regulation of transcription by RNA polymerase II, transcription cis-regulatory region binding	hmg-1.1 encodes a member of the high mobility group (HMG) family of proteins.	Predicted to enable DNA binding activity, bending and transcription cis-regulatory region binding activity. Predicted to be involved in regulation of transcription by RNA polymerase II. Predicted to be located in nucleus. Expressed in head neurons\; pharynx\; tail neurons\; ventral nerve cord\; and vulva.	Enriched in PVD, OLL, NSM, germ line, ABarpaaa, ABplapaaaa, ABprapaaaa, ABpraaapaa, ABalppppaa, AIMR, AIML, ABalaaaala, ABalaapaaa, ABprpaapap, ABplpaapap, ABalapaaaa, ABalappapa, body wall muscle cell, ADF, ADL, AFD, ASE, ASG, ASH, ASI, ASJ, ASK, AWA, AWB, AWC, AQR, PVR, PQR, IL2 neuron, IL1 neuron, CEP, ADE, PDE, BAG, FLP, OLQ, PHA, PHB, Caapa, ABalapaappa, ABarapppppa, ABalppapppa, ABalappppaa…	WBPaper00026935|pmid16267406, WBPaper00027309|pmid18050428, WBPaper00038491|pmid21647448, WBPaper00040135|pmid21874007, WBPaper00042117|pmid23040073, WBPaper00055090|pmid30120140
chrV	9338859	9344129	5271	2	3565833	NR_133617	WBGene00019466	tos-1	Target Of Splicing	WBGene00019466	tos-1	Caenorhabditis elegans	protein_coding_gene	K07B1.6	CELE_K07B1.6	K07B1.6c, K07B1.6d, K07B1.6e, K07B1.6a.1, K07B1.6b.1, K07B1.6b.2	N.A.	N.A.	N.A.	H2KZK5, Q95R01	H2KZK5	TF320143	NR_133619.1, NR_133618.1, NM_001392573.1, NM_001380724.3, NR_133617.1	NP_001379853.1, NP_001367721.1	V 2.00 +/- 0.00	mv_K07B1.6, sjj2_K07B1.6a.1|V-15J09, cenix:35-b1_1, cenix:148-d11, cenix:35-b1, sjj_K07B1.6	larval arrest	alternative splicing defective	gk243142|Substitution|Nonsense, gk513859|Substitution|Missense, gk742316|Substitution|Missense, gk808270|Substitution|Missense	magi-1|Physical	N.A.	ABarpapaapp, ABplaaaaapp, ADA, AFD, AIZ, ASER, AVG, AVK, BDU, body wall musculature, DB1, DB2, DB3, DB4, DB5, DB6, DB7, germ line, intestine, M5 neuron, MCL, MCR, MI neuron, neuron, NSM, OLL, PHB, PLM, PVD, PVM, PVR, PVW, RIG, sensory neuron, VA1, VA10, VA11, VA12, VA2, VA3, VA4, VA5, VA6, VA7, VA8, VA9, VB1, VB10, VB11, VB2, VB3, VB4, VB5, VB6, VB7, VB8, VB9	N.A.	1-day post-L4 adult hermaphrodite Ce, 2-days post-L4 adult hermaphrodite Ce, 3-days post-L4 adult hermaphrodite Ce, 3-fold embryo Ce, 4-cell embryo Ce, 4-days post-L4 adult hermaphrodite Ce, 5-days post-L4 adult hermaphrodite Ce, 6-days post-L4 adult hermaphrodite Ce, 7-10 days post-L4 adult hermaphrodite Ce, adult Ce, adult hermaphrodite Ce, adult male Ce, all stages Ce, blastula embryo Ce, daue…	N.A.	N.A.	N.A.	N.A.	Enriched in body wall musculature\; germ line\; intestine\; and neurons based on microarray\; RNA-seq\; and single-cell RNA-seq studies. Is affected by several genes including daf-2\; rde-1\; and sir-2.1 based on microarray and RNA-seq studies. Is affected by thirteen chemicals including aldicarb\; rotenone\; and Rifampin based on microarray and RNA-seq studies.	Enriched in PVD, OLL, NSM, neuron, AFD, ASER, PLM, germ line, AVK, sensory neuron, ABarpapaapp, ABplaaaaapp, ADA, AIZ, AVG, BDU, DB1, DB7, DB6, DB5, DB4, DB3, DB2, M5 neuron, MCR, MCL, MI neuron, PHB, PVM, PVR, PVW, RIG, VA12, VA11, VA10, VA9, VA8, VA7, VA6, VA5, VA4, VA3, VA2, VA1, VB1, VB2, VB11, VB10, VB9, VB8, VB7, VB6, VB5, VB4, VB3, intestine and body wall musculature according to microarra…	WBPaper00039705|pmid N.A., WBPaper00040388|pmid22033331, WBPaper00041328|pmid22829783, WBPaper00043872|pmid N.A.
chrIV	2388245	2388265	21	1	13192369	NR_052971	WBGene00168399	21ur-15588	ncRNA	WBGene00168399	21ur-15588	Caenorhabditis elegans	piRNA_gene	Y38F2AR.15	CELE_Y38F2AR.15	Y38F2AR.15	N.A.	N.A.	N.A.	N.A.	N.A.	N.A.	NR_052971.1	N.A.	IV -7.69 +/- 0.04	N.A.	N.A.	lethal, sterile	N.A.	N.A.	N.A.	N.A.	N.A.	N.A.	N.A.	N.A.	N.A.	N.A.	Is affected by spc-1 and unc-70 based on RNA-seq studies.	Affected by spc-1 and unc-70 according to RNA-seq.	N.A.
chrIII	10747787	10748157	371	1	13191215	NR_052708	WBGene00197604	K01G5.12	ncRNA	WBGene00197604	K01G5.12	Caenorhabditis elegans	ncRNA_gene	K01G5.12	CELE_K01G5.12	K01G5.12	N.A.	N.A.	N.A.	N.A.	N.A.	N.A.	NR_052708.1	N.A.	III 5.182301	N.A.	N.A.	lethal, sterile	N.A.	N.A.	N.A.	N.A.	N.A.	N.A.	N.A.	N.A.	N.A.	N.A.	N.A.	N.A.	N.A.
chrI	4790330	4790469	140	1	172095	NM_001316854	WBGene00023068	rpl-41.2	60S ribosomal protein L41	WBGene00023068	rpl-41.2	Caenorhabditis elegans	protein_coding_gene	F54D7.7	CELE_F54D7.7	F54D7.7.1, F54D7.7:wp192	CEOP1917	CE26932	CE26932|PFAM:PF05162|INTERPRO:IPR007836	A0A0M6VD87	A0A0M6VD87	N.A.	NM_001316854.4	NP_001303783.1	I -0.73	mv_G_YK3450	aldicarb resistant	N.A.	N.A.	N.A.	N.A.	ADA, ADE, AIZ, anterior gonadal sheath cell, anterior spermatheca, AVL, CAN, excretory gland cell, germ line, hermaphrodite distal tip cell, intestine, M cell, M1 neuron, m2L, m2R, male distal tip cell, MI neuron, PDB, posterior gonadal sheath cell, Posterior spermatheca, RID, RIG, RIH, somatic gonad precursor	N.A.	1-day post-L4 adult hermaphrodite Ce, 2-days post-L4 adult hermaphrodite Ce, 3-days post-L4 adult hermaphrodite Ce, 6-days post-L4 adult hermaphrodite Ce, adult Ce, adult hermaphrodite Ce, embryo Ce, L1 larva Ce, L2 larva Ce, L2d larva Ce, L3 larva Ce, L4 larva Ce, L4-adult lethargus Ce	N.A.	N.A.	ribosome, structural constituent of ribosome, translation	N.A.	Predicted to be a structural constituent of ribosome. Predicted to be involved in translation. Predicted to be located in ribosome.	Enriched in germ line, somatic gonad precursor, M cell, ADA, ADE, AIZ, AVL, CAN, hermaphrodite distal tip cell, male distal tip cell, excretory gland cell, anterior gonadal sheath cell, posterior gonadal sheath cell, intestine, M1 neuron, m2R, m2L, MI neuron, PDB, RID, RIG, RIH, anterior spermatheca and Posterior spermatheca according to RNA-seq, single-cell RNA-seq and microarray. Affected by da…	N.A.
chrIII	12367657	12368166	510	2	176660	NM_001268233	WBGene00001946	his-72	Histone H3.3 type 2	WBGene00001946	his-72	Caenorhabditis elegans	protein_coding_gene	Y49E10.6	CELE_Y49E10.6	Y49E10.6a.1, Y49E10.6b.1	N.A.	CE22223	CE22223|HMMPANTHER:PTHR11426|HMMPANTHER:PTHR11426:SF198|PRINTS:PR00622|SCANPROSITE:PS00322|SCANPROSITE:PS00959|SMART:SM00428|PFAM:PF00125|SUPERFAMILY:SSF47113|INTERPRO:IPR000164|INTERPRO:IPR007125|INTERPRO:IPR009072	Q9U281, H2L2K8	Q9U281	N.A.	NM_001268233.3, NM_001268234.5	NP_001255163.1, NP_001255162.1	III 17.12 +/- 0.06	TH:331C6, mv_Y49E10.6, smd_Y49E10.6, cenix:331-c6, sjj_Y49E10.6|III-6C20	avoids bacterial lawn, distal tip cell morphology variant, embryonic lethal, larval arrest, larval lethal, protruding vulva, slow growth, sluggish, sterile, thin	N.A.	gk188212|Substitution|Missense, gk188213|Substitution|Missense, gk389412|Substitution|Missense, gk415971|Substitution|Missense, gk468239|Substitution|Missense, gk543761|Substitution|Missense, gk545779|Substitution|Missense, gk642069|Substitution|Missense, gk701797|Substitution|Missense, gk799825|Substitution|Missense	dnj-23|Physical, hmg-3|Physical, met-2|Physical, smo-1|Physical	Cell, germ cell, hermaphrodite, male, somatic cell	ABalappaap, ABalpppapa, ABalppppaa, ABalpppppp, ABarppaapp, ABarpppapp, ABplaapaaa, ABplaapaap, ABplapappp, ABplapapppp, ABplpaaaaa, ABplpaappa, ABplpapapa, ABplppaaaap, ABplpppapa, ABplppppap, ABplpppppp, ABpraaaapa, ABpraaapaa, ABpraaappp, ABpraapaaa, ABpraapaap, ABprapappp, ABprapapppp, ABprpaaaaa, ABprpaappa, ABprpapapa, ABprppaaaap, ABprpppapa, ABprppppap, ABprpppppp, ALML, ALMR, BDUL, BDUR,…	adult Ce, all stages Ce, embryo Ce, L1 larva Ce, L2 larva Ce, L3 larva Ce, L4 larva Ce	1-day post-L4 adult hermaphrodite Ce, 10-days post-L4 adult hermaphrodite Ce, 3-days post-L4 adult hermaphrodite Ce, 3-fold embryo Ce, 4-days post-L4 adult hermaphrodite Ce, 5-days post-L4 adult hermaphrodite Ce, 6-days post-L4 adult hermaphrodite Ce, adult Ce, adult hermaphrodite Ce, adult male Ce, all stages Ce, dauer larva Ce, embryo Ce, L1 larva Ce, L2 larva Ce, L2d larva Ce, L3 larva Ce, L4 …	N.A.	HGNC:4764|OrthoFinder;OMA;Panther;OrthoInspector, HGNC:4765|OrthoFinder;OMA;Panther;OrthoInspector, HGNC:33164|OrthoFinder;EnsEMBL-Compara;Panther	chromosome, DNA binding, intracellular non-membrane-bounded organelle, nucleosome, nucleus, protein heterodimerization activity, structural constituent of chromatin	his-72 encodes an H3 histone required for embryonic viability.	Predicted to enable DNA binding activity and protein heterodimerization activity. Predicted to be a structural constituent of chromatin. Located in nucleus. Part of nucleosome. Expressed in several structures, including germ cell\; somatic cell\; and in male. Is an ortholog of human H3-3A (H3.3 histone A) and H3-3B (H3.3 histone B).	Enriched in PVD, OLL, dopaminergic neuron, neuron, germ line, somatic gonad precursor, sensory neuron, ABpraaapaa, ABalppppaa, BDUR, BDUL, ALMR, ALML, DVC, ABalpppapa, ABpraaaapa, ABarppaapp, ABarpppapp, ABpraaappp, ABalpppppp, ABprpaappa, ABplpaappa, ABplpaaaaa, ABprpaaaaa, ABprpppapa, ABplpppapa, ABplppppap, ABprppppap, ABpraapaap, ABplaapaap, ABplpapapa, ABprpapapa, ABpraapaaa, ABplaapaaa, ABp…	WBPaper00004403|pmid11099034, WBPaper00025088|pmid15837805, WBPaper00025810|pmid N.A., WBPaper00028342|pmid16846252, WBPaper00032530|pmid19181702, WBPaper00035524|pmid19966274, WBPaper00038491|pmid21647448, WBPaper00047210|pmid N.A., WBPaper00052322|pmid N.A., WBPaper00052441|pmid N.A., WBPaper00053609|pmid29358705, WBPaper00055090|pmid30120140, WBPaper00056063|pmid25608721, WBPaper00058053|pmid …
chrV	7196237	7196580	344	2	24104416	NR_102035	WBGene00219888	F09G2.14	ncRNA	WBGene00219888	F09G2.14	Caenorhabditis elegans	snoRNA_gene	F09G2.14	CELE_F09G2.14	F09G2.14	N.A.	N.A.	N.A.	N.A.	N.A.	N.A.	NR_102035.1	N.A.	V 0.630635	N.A.	N.A.	N.A.	N.A.	N.A.	N.A.	N.A.	N.A.	N.A.	N.A.	N.A.	N.A.	N.A.	Is affected by adr-1 and set-2 based on RNA-seq studies.	Affected by adr-1 and set-2 according to RNA-seq.	N.A.
chrIII	1419217	1419636	420	1	175299	NM_001027795	WBGene00022336	Y82E9BR.3	ATP synthase lipid-binding protein, mitochondrial	WBGene00022336	Y82E9BR.3	Caenorhabditis elegans	protein_coding_gene	Y82E9BR.3	CELE_Y82E9BR.3	Y82E9BR.3.1, Y82E9BR.3.2	N.A.	CE27044	CE27044|HMMPANTHER:PTHR10031|HMMPANTHER:PTHR10031:SF31|PRINTS:PR00124|SCANPROSITE:PS00605|PFAM:PF00137|SUPERFAMILY:SSF81333|INTERPRO:IPR000454|INTERPRO:IPR002379|INTERPRO:IPR035921|INTERPRO:IPR038662	Q9BKS0	Q9BKS0	TF300140	NM_001384026.2	NP_001370803.1	III -21.859631	N.A.	embryonic lethal, general pace of development defective early emb, larval arrest, pattern of transgene expression variant, receptor mediated endocytosis defective, transgene expression increased	N.A.	gk166629|Substitution|Missense, gk166630|Substitution|Missense, gk332955|Substitution|Missense	C30F12.4|Physical, hsp-6|Regulatory	body wall musculature, hypodermis, intestine, pharyngeal muscle cell	anterior gonadal sheath cell, anterior spermatheca, body wall musculature, dorsal nerve cord, germ line, germline precursor cell, hermaphrodite distal tip cell, intestine, lateral nerve cord, male distal tip cell, nerve ring, pharynx, posterior gonadal sheath cell, Posterior spermatheca, somatic neuron, tail neuron, ventral nerve cord, vulval muscle	all stages Ce	1-cell embryo Ce, 1-day post-L4 adult hermaphrodite Ce, 2-days post-L4 adult hermaphrodite Ce, 3-days post-L4 adult hermaphrodite Ce, 6-days post-L4 adult hermaphrodite Ce, 7-10 days post-L4 adult hermaphrodite Ce, adult Ce, adult hermaphrodite Ce, all stages Ce, blastula embryo Ce, dauer larva Ce, embryo Ce, L1 larva Ce, L2 larva Ce, L2d larva Ce, L3 larva Ce, L4 larva Ce, oocyte-laying stage ad…	renal cell carcinoma|By Orthology, clear cell renal cell carcinoma|By Orthology, urinary bladder cancer|By Orthology	HGNC:841|EnsEMBL-Compara;Hieranoid;Panther;SonicParanoid;PhylomeDB;Inparanoid;OMA;OrthoInspector, HGNC:842|EnsEMBL-Compara;Hieranoid;Panther;SonicParanoid;PhylomeDB;Inparanoid;OrthoInspector, HGNC:843|EnsEMBL-Compara;Hieranoid;Panther;SonicParanoid;PhylomeDB;Inparanoid;OrthoInspector	integral component of membrane, ion transport, lipid binding, membrane, mitochondrial membrane, mitochondrial proton-transporting ATP synthase complex, coupling factor F(o), mitochondrion, proton motive force-driven ATP synthesis, proton transmembrane transport, proton transmembrane transporter activity, proton-transporting ATP synthase complex, coupling factor F(o), proton-transporting two-secto…	N.A.	Predicted to enable lipid binding activity and proton transmembrane transporter activity. Predicted to be involved in proton motive force-driven ATP synthesis. Predicted to be located in mitochondrial membrane. Predicted to be integral component of membrane. Predicted to be part of mitochondrial proton-transporting ATP synthase complex, coupling factor F(o). Expressed in hypodermis and pharyngeal…	Enriched in intestine, ventral nerve cord, body wall musculature, vulval muscle, nerve ring, dorsal nerve cord, somatic neuron, tail neuron, lateral nerve cord, pharynx, germline precursor cell, hermaphrodite distal tip cell, male distal tip cell, germ line, anterior gonadal sheath cell, posterior gonadal sheath cell, anterior spermatheca and Posterior spermatheca according to SAGE analysis, Chro…	WBPaper00028999|pmid17223323, WBPaper00038491|pmid21647448, WBPaper00051016|pmid26164083, WBPaper00055090|pmid30120140, WBPaper00055359|pmid30287841, WBPaper00060275|pmid32494730, WBPaper00061870|pmid34467850
chrIV	17117868	17118017	150	1	13210851	NR_068223	WBGene00200927	Y116A8C.466	ncRNA	WBGene00200927	Y116A8C.466	Caenorhabditis elegans	ncRNA_gene	Y116A8C.466	CELE_Y116A8C.466	Y116A8C.466	N.A.	N.A.	N.A.	N.A.	N.A.	N.A.	NR_068223.1	N.A.	IV 16.190001	N.A.	N.A.	N.A.	N.A.	N.A.	N.A.	N.A.	N.A.	N.A.	N.A.	N.A.	N.A.	N.A.	Is affected by cep-1 based on RNA-seq studies.	Affected by cep-1 according to RNA-seq.	N.A.
chrIV	9772532	9773364	833	1	177815	NM_001268492	WBGene00000301	cav-1	Caveolin;Caveolin-1	WBGene00000301	cav-1	Caenorhabditis elegans	protein_coding_gene	T13F2.8	CELE_T13F2.8	T13F2.8a.1, T13F2.8b.1	N.A.	CE13633, CE46817	CE13633|HMMPANTHER:PTHR10844:SF21|HMMPANTHER:PTHR10844|PFAM:PF01146|INTERPRO:IPR001612|INTERPRO:IPR031097, CE46817|HMMPANTHER:PTHR10844|HMMPANTHER:PTHR10844:SF21|PFAM:PF01146|INTERPRO:IPR001612|INTERPRO:IPR031097	Q94051, H2L2G6	Q94051	TF315736	NM_001268492.4, NM_001268493.3	NP_001255422.1, NP_001255421.1	IV 4.41 +/- 0.00	mv_T13F2.8, sjj_T13F2.8|IV-5G03, cenix:46-b12, smd_T13F2.8	activity level variant, aldicarb hypersensitive, locomotion variant, organism development variant, protein expression reduced, sick, transgene expression increased	fat content reduced, fertility reduced, growth variant, late endosome morphology variant, levamisole hypersensitive, mechanosensation variant	gk466706|Substitution|Missense, gk594466|Substitution|Missense, gk681679|Substitution|Missense, gk682231|Substitution|Missense, gk724426|Substitution|Missense, gk737265|Substitution|Missense, gk917087|Substitution|Missense	arf-1|Regulatory, cav-1|Physical, cav-1|Physical, cdc-48.2|Genetic, ckb-2|Regulatory, daf-12|Regulatory, dlg-1|Physical, glp-1|Genetic, laat-1|Regulatory, let-60|Genetic, rab-1|Regulatory, rab-6.1|Regulatory, rme-2|Regulatory, sip-1|Physical, sma-6|Genetic, tfg-1|Regulatory, ubq-1|Physical, wdr-5.1|Physical	embryonic cell, germ cell, germ line, gonad arm, nerve ring, nervous system, neuron, pharynx, tail, ventral nerve cord	ABalaaaala, ABalaaaarl, ABalaaaarr, ABalaapaaa, ABalaapppp, ABalaappppa, ABalapaaaa, ABalapaapp, ABalapaappa, ABalapapap, ABalapapapa, ABalapappaa, ABalappapa, ABalapppaa, ABalapppap, ABalapppapa, ABalappppa, ABalappppaa, ABalpapaap, ABalpappaa, ABalppappp, ABalppapppa, ABalpppapa, ABalpppappp, ABalppppaa, ABalppppapa, ABalpppppa, ABalpppppp, ABalppppppa, ABalppppppp, ABaraappaa, ABarapapaa, ABar…	adult Ce, embryo Ce, L1 larva Ce, L2 larva Ce, L3 larva Ce, L4 larva Ce, larva Ce	1-day post-L4 adult hermaphrodite Ce, 10-days post-L4 adult hermaphrodite Ce, 11-15 days post-L4 adult hermaphrodite Ce, 2-days post-L4 adult hermaphrodite Ce, 20-days post-L4 adult hermaphrodite Ce, 3-days post-L4 adult hermaphrodite Ce, 3-fold embryo Ce, 4-days post-L4 adult hermaphrodite Ce, 5-days post-L4 adult hermaphrodite Ce, 6-days post-L4 adult hermaphrodite Ce, 7-10 days post-L4 adult h…	leiomyoma|By Orthology, systemic scleroderma|By Orthology, primary open angle glaucoma|By Orthology, limited scleroderma|By Orthology, diffuse scleroderma|By Orthology, breast cancer|By Orthology, melanoma|By Orthology, multiple sclerosis|By Orthology, transitional cell carcinoma|By Orthology, invasive ductal carcinoma|By Orthology, breast carcinoma|By Orthology, ovarian carcinoma|By Orthology, r…	HGNC:1527|OrthoFinder;Panther;Inparanoid;OrthoInspector, HGNC:1529|OrthoFinder;Inparanoid;OrthoInspector	caveola assembly, caveola, cell cortex, cortical granule, cytoplasmic side of plasma membrane, Golgi apparatus, Golgi membrane, integral component of membrane, integral component of plasma membrane, meiotic cell cycle, membrane raft, membrane, molecular adaptor activity, perinuclear region of cytoplasm, plasma membrane, Ras protein signal transduction, regulation of oviposition, transport vesicle	cav-1 encodes one of two C. elegans caveolin orthologs\; cav-1 is required for viability and Ras\/MAP-kinase-dependent progression through the meiotic cell cycle\; CAV-1 is expressed in the adult germ line and during embryonic development\; CAV-1::GFP localizes to cortical granules that function to secrete chondroitin and mucin-like proteoglycans to the extracellular space following fertilization.	Predicted to enable molecular adaptor activity. Involved in Ras protein signal transduction\; meiotic cell cycle\; and regulation of oviposition. Located in cytoplasm and cytoplasmic side of plasma membrane. Is integral component of plasma membrane. Expressed in several structures, including germ cell\; gonad arm\; nervous system\; pharynx\; and tail. Human ortholog(s) of this gene implicated in …	Enriched in germ line, DA neuron, VA neuron, cephalic sheath cell, CEPshVR, CEPshVL, CEPshDR, CEPshDL, ABarpaaa, ABplapaaaa, ABprapaaaa, ABpraaapaa, ABalppppaa, ABalaaaala, ABalaapaaa, ABprpaapap, ABplpaapap, ABpraaapppa, ABalppppppa, AWAR, AWAL, ASGR, ASGL, ABpraapappp, ABplaapappp, ABpraaaappp, ABalpppappp, ABalapaaaa, ABalappapa, body wall muscle cell, ADF, ADL, AFD, ASE, ASG, ASH, ASI, ASJ, A…	WBPaper00002653|pmid8999956, WBPaper00003590|pmid10559886, WBPaper00003596|pmid10559891, WBPaper00004384|pmid10996790, WBPaper00006323|pmid14738731, WBPaper00024312|pmid15268860, WBPaper00024791|pmid N.A., WBPaper00027612|pmid16672374, WBPaper00028448|pmid16943275, WBPaper00029226|pmid17397820, WBPaper00030844|pmid17626846, WBPaper00030848|pmid17629760, WBPaper00031193|pmid17997305, WBPaper000318…
chrIII	2786204	2786679	476	1	3565081	NM_065217	WBGene00022170	cox-6B	Cytochrome OXidase assembly protein	WBGene00022170	cox-6B	Caenorhabditis elegans	protein_coding_gene	Y71H2AM.5	CELE_Y71H2AM.5	Y71H2AM.5.1, Y71H2AM.5.2	CEOP3084	CE22939	CE22939|HMMPANTHER:PTHR11387|HMMPANTHER:PTHR11387:SF2|PFAM:PF02297|SUPERFAMILY:SSF47694|INTERPRO:IPR003213|INTERPRO:IPR036549	Q9BL34	Q9BL34	TF105065	NM_065217.8	NP_497618.1	III -10.73	sjj_Y71H2_388.f|III-7K10, sjj_Y71H2_388.c|III-7K04, cenix:233-e2	avoids bacterial lawn, clear, embryonic lethal, extended life span, larval arrest, no induction of antimicrobial peptide expression after infection, paraquat resistant, pattern of transgene expression variant, receptor mediated endocytosis defective, slow growth, sterile, sterile progeny	acute functional tolerance to alcohol defective, ethanol hypersensitive, lethal, sterile	tm12596|Deletion|Inframe_deletion, tm3600|Deletion|Inframe_deletion, gk169282|Substitution|Missense, gk169286|Substitution|Missense, gk169292|Substitution|Missense, gk169296|Substitution|Missense, gk169298|Substitution|Missense, gk169299|Substitution|Missense, gk169300|Substitution|Missense, gk169305|Substitution|Missense, gk169308|Substitution|Missense, gk169316|Substitution|Nonsense, gk169322|S…	dlg-1|Physical, enri-2|Physical, glh-1|Physical, lgl-1|Physical, myrf-1|Physical, pid-3|Physical, pik-1|Physical, sip-1|Physical, smo-1|Physical, zen-4|Physical	N.A.	AFD, anterior gonadal sheath cell, ASER, intestine, male-specific anatomical entity, neuron, NSM, posterior gonadal sheath cell	N.A.	1-day post-L4 adult hermaphrodite Ce, 10-days post-L4 adult hermaphrodite Ce, 11-15 days post-L4 adult hermaphrodite Ce, 20-days post-L4 adult hermaphrodite Ce, 3-days post-L4 adult hermaphrodite Ce, 3-fold embryo Ce, 6-days post-L4 adult hermaphrodite Ce, adult Ce, adult hermaphrodite Ce, all stages Ce, dauer larva Ce, embryo Ce, L1 larva Ce, L2 larva Ce, L2d larva Ce, L3 larva Ce, L4 larva Ce, …	cytochrome-c oxidase deficiency disease|By Orthology	HGNC:2280|EnsEMBL-Compara;Hieranoid;Panther;OrthoFinder;SonicParanoid;PhylomeDB;Inparanoid;OrthoInspector, HGNC:24380|EnsEMBL-Compara;Panther;OrthoFinder;SonicParanoid;PhylomeDB;Inparanoid;OrthoInspector	mitochondrion, respiratory chain complex IV	N.A.	Predicted to be located in mitochondrion. Predicted to be part of respiratory chain complex IV. Human ortholog(s) of this gene implicated in cytochrome-c oxidase deficiency disease. Is an ortholog of human COX6B1 (cytochrome c oxidase subunit 6B1).	Enriched in NSM, AFD, ASER, anterior gonadal sheath cell, posterior gonadal sheath cell, male-specific anatomical entity, intestine and neuron according to RNA-seq, single-cell RNA-seq and microarray. Affected by aak-2, daf-12, daf-16, npr-1, jmjd-3.1, jmjd-1.2, emb-4, sma-4, lin-22, smo-1, nuo-6, pmt-2, atf-7, ints-1, ints-5, pid-3, cfp-1, egl-43, unc-30 and sir-2.1 according to RNA-seq, tiling …	WBPaper00038491|pmid21647448, WBPaper00046494|pmid25713357, WBPaper00055090|pmid30120140
chrI	11910421	11910956	536	2	173071	NM_060622	WBGene00011156	rbm-3.2	RRM domain-containing protein	WBGene00011156	rbm-3.2	Caenorhabditis elegans	protein_coding_gene	R09B3.3	CELE_R09B3.3	R09B3.3.1	N.A.	CE16308	CE16308|HMMPANTHER:PTHR45735|HMMPANTHER:PTHR45735:SF2|PFSCAN:PS50102|SMART:SM00360|SMART:SM00361|PFAM:PF00076|SUPERFAMILY:SSF54928|INTERPRO:IPR000504|INTERPRO:IPR003954|INTERPRO:IPR012677|INTERPRO:IPR035979	O45713	O45713	TF354331	NM_060622.10	NP_493023.1	I 12.93	sjj_R09B3.3|I-5P20, mv_R09B3.3, cenix:199-a4	N.A.	N.A.	gk666944|Substitution|Missense, gk790572|Substitution|Missense	ccar-1|Physical, cey-1|Physical, comt-3|Physical, dhc-1|Genetic, elks-1|Physical, F54D10.7|Physical, myrf-2|Physical, nmad-1|Physical, pan-1|Physical, pid-3|Physical, sip-1|Physical, spc-1|Physical, spe-39|Physical, spn-4|Genetic, tofu-6|Physical, tost-1|Physical, vps-45|Physical	N.A.	ABplaapaap, ABplpappaa, ABplpppppp, ABpraapaap, ABprpppppp, ADA, ADF, ADL, AFD, ASE, ASER, ASG, ASH, ASI, ASJ, ASK, AUA, AVJ, AWA, AWB, AWC, AWC-ON, body wall muscle cell, CAN, excretory gland cell, germ line, hermaphrodite distal tip cell, I4 neuron, intestine, M cell, male distal tip cell, MSaapaapa, MSpapaapa, RIC, RIG, somatic gonad precursor, sperm, URB	N.A.	1-day post-L4 adult hermaphrodite Ce, 10-days post-L4 adult hermaphrodite Ce, 2-days post-L4 adult hermaphrodite Ce, 3-days post-L4 adult hermaphrodite Ce, 3-fold embryo Ce, 4-days post-L4 adult hermaphrodite Ce, 6-days post-L4 adult hermaphrodite Ce, 7-10 days post-L4 adult hermaphrodite Ce, adult Ce, adult hermaphrodite Ce, adult male Ce, all stages Ce, dauer larva Ce, embryo Ce, L1 larva Ce, L…	N.A.	N.A.	mRNA binding, mRNA cleavage and polyadenylation specificity factor complex, nucleic acid binding, pre-mRNA cleavage required for polyadenylation, protein binding, RNA binding	N.A.	Predicted to enable mRNA binding activity. Predicted to be involved in pre-mRNA cleavage required for polyadenylation. Predicted to be part of mRNA cleavage and polyadenylation specificity factor complex.	Enriched in intestine, germ line, AFD, ASER, somatic gonad precursor, body wall muscle cell, ADF, ADL, ASE, ASG, ASH, ASI, ASJ, ASK, AWA, AWB, AWC, ABplpappaa, MSaapaapa, MSpapaapa, M cell, ABpraapaap, ABplaapaap, ABplpppppp, ABprpppppp, ADA, AUA, AVJ, AWC-ON, CAN, hermaphrodite distal tip cell, male distal tip cell, excretory gland cell, I4 neuron, RIC, RIG, sperm and URB according to tiling arr…	WBPaper00038491|pmid21647448, WBPaper00055090|pmid30120140, WBPaper00060801|pmid33369608
chrI	7519240	7519339	100	1	24104255	NR_101583	WBGene00219835	C26C6.14	ncRNA	WBGene00219835	C26C6.14	Caenorhabditis elegans	ncRNA_gene	C26C6.14	cel-inc51, CELE_C26C6.14	C26C6.14	N.A.	N.A.	N.A.	N.A.	N.A.	N.A.	NR_101583.1	N.A.	I 2.098528	N.A.	N.A.	N.A.	N.A.	N.A.	N.A.	N.A.	N.A.	N.A.	N.A.	N.A.	N.A.	N.A.	Is affected by dlc-1 based on RNA-seq studies.	Affected by dlc-1 according to RNA-seq.	N.A.
chrIV	17079848	17087329	7482	2	178482	NM_070625	WBGene00013803	snx-13	PX domain-containing protein;PXA domain-containing protein;Sorting NeXin	WBGene00013803	snx-13	Caenorhabditis elegans	protein_coding_gene	Y116A8C.26	CELE_Y116A8C.26	Y116A8C.26a.1, Y116A8C.26b.1, Y116A8C.26c.1, Y116A8C.26d.1	CEOP4632	CE48040, CE41041, CE46880, CE50671	CE48040|HMMPANTHER:PTHR22775|HMMPANTHER:PTHR22775:SF3|PFSCAN:PS51207|PFSCAN:PS50132|PFSCAN:PS50195|SMART:SM00313|SMART:SM00312|SMART:SM00315|PFAM:PF00787|PFAM:PF00615|PFAM:PF02194|PFAM:PF08628|SUPERFAMILY:SSF64268|SUPERFAMILY:SSF48097|INTERPRO:IPR001683|INTERPRO:IPR003114|INTERPRO:IPR013937|INTERPRO:IPR016137|INTERPRO:IPR036305|INTERPRO:IPR036871|INTERPRO:IPR044926, CE41041|HMMPANTHER:PTHR22775|H…	A0A0K3AUG5, Q9U2U6, A5HWB0, H1UBK0	Q9U2U6	TF324055	NM_070625.8, NM_001313045.3, NM_001372974.2, NM_001268990.3	NP_001255919.1, NP_001299974.1, NP_503026.3, NP_001359711.1	IV 16.13	sjj_Y116A8C.26|IV-8I05, mv_Y116A8C.26, cenix:47-b6	accumulated germline cell corpses	N.A.	gk222691|Substitution|Missense, gk222705|Substitution|Missense, gk363614|Substitution|Missense, gk373289|Substitution|Missense, gk401765|Substitution|Missense, gk430096|Substitution|Nonsense, gk450125|Substitution|Missense, gk485208|Substitution|Missense, gk488224|Substitution|Missense, gk577814|Substitution|Missense, gk584558|Substitution|Missense, gk641465|Substitution|Missense, gk648711|Substi…	alp-1|Physical, dlg-1|Physical	N.A.	AVA, germ line, intestine, neuron, OLL, PVD	N.A.	1-day post-L4 adult hermaphrodite Ce, 2-days post-L4 adult hermaphrodite Ce, 3-days post-L4 adult hermaphrodite Ce, 3-fold embryo Ce, 6-days post-L4 adult hermaphrodite Ce, 7-10 days post-L4 adult hermaphrodite Ce, adult Ce, adult hermaphrodite Ce, all stages Ce, dauer larva Ce, embryo Ce, L1 larva Ce, L2 larva Ce, L2d larva Ce, L3 larva Ce, L4 larva Ce, L4-adult lethargus Ce, larva Ce, prolifera…	N.A.	HGNC:21335|EnsEMBL-Compara;Hieranoid;Panther;OrthoFinder;SonicParanoid;PhylomeDB;Inparanoid;OMA;OrthoInspector	early endosome, integral component of membrane, intracellular membrane-bounded organelle, membrane, phosphatidylinositol binding	N.A.	Predicted to enable phosphatidylinositol binding activity. Predicted to be located in early endosome. Is an ortholog of human SNX13 (sorting nexin 13).	Enriched in PVD, OLL, neuron, AVA, germ line and intestine according to microarray, tiling array and RNA-seq. Affected by isp-1, cox-5B, jmjd-3.1, jmjd-1.2, glh-4, glh-1, pgl-1, pgl-3, sma-2, sma-4, pmt-2, pals-22, sek-1, iff-1, cfp-1, meg-3, set-6, baz-2, hlh-11, sir-2.1, eri-1, ain-2, daf-16, fbf-1, tdp-1 and hlh-29 according to microarray and RNA-seq. Affected by rotenone, D-glucose, Alovudine…	WBPaper00031805|pmid18425118, WBPaper00038491|pmid21647448, WBPaper00041771|pmid23195953, WBPaper00055090|pmid30120140, WBPaper00061460|pmid34081703
chrI	1340703	1341084	382	1	266820	NM_058441	WBGene00004888	smo-1	Small ubiquitin-related modifier	WBGene00004888	smo-1	Caenorhabditis elegans	protein_coding_gene	K12C11.2	SMT3, SMT3, K12C11.f, K12C11.f, CELE_K12C11.2	K12C11.2.1	N.A.	CE18056	CE18056|HMMPANTHER:PTHR10562|HMMPANTHER:PTHR10562:SF14|PFSCAN:PS50053|SMART:SM00213|PFAM:PF11976|SUPERFAMILY:SSF54236|INTERPRO:IPR000626|INTERPRO:IPR022617|INTERPRO:IPR029071	P55853	P55853	TF315116	NM_058441.7	NP_490842.1	I -14.70 +/- 0.01	cenix:235-d3, mv_K12C11.2, mv_K12C11.f, sjj_K12C11.2|I-1O13	blistered, body elongation variant, cytoplasmic processing body variant, dumpy, ectopic expression transgene, embryonic lethal, embryonic lethal late emb, everted vulva, gonad development variant, gonad morphology variant, hypersensitive to protein aggregation induced paralysis, late embryonic arrest, lethal, male gonad development variant, male somatic gonad development variant, morphology pheno…	cell junction variant, desynapsis defective, germ cell development variant, protein aggregation variant, protein expression ectopic, protein subcellular localization variant, protein transport variant, somatic gonad morphology variant, sterile, synapsis defective, vulva morphology variant	gk102906|Substitution|Missense, gk630875|Substitution|Missense, gk702291|Substitution|Missense	hmgs-1|Physical;Regulatory, lin-15A|Physical;Genetic, lin-15B|Physical;Genetic, lin-1|Physical;Genetic, nhr-25|Physical;Regulatory, aagr-1|Physical, aagr-2|Physical, aagr-3|Physical, aagr-4|Physical, aak-2|Physical, aakg-2|Physical, aars-2|Physical, aass-1|Physical, aat-1|Physical, aat-3|Physical, abce-1|Physical, abcf-2|Physical, abcf-3|Physical, abhd-3.1|Physical, AC3.5|Physical, acaa-2|Physica…	anchor cell, anterior distal tip cell, body wall musculature, dorsal nerve cord, germ line, gonadal sheath cell, hypodermis, intestine, lateral nerve cord, nerve ring, nervous system, P3.p hermaphrodite, P4.p hermaphrodite, P5.p hermaphrodite, P6.p hermaphrodite, P7.p hermaphrodite, P8.p hermaphrodite, pharyngeal-intestinal valve, pharynx, posterior distal tip cell, rectal epithelium, reproductiv…	ABalpappaa, ABalpppppa, ABalpppppp, ABarapapaa, ABplaapaap, ABplapappp, ABpraaappa, ABpraaappp, ABpraapaap, ABprapappp, ABprpapppa, ADF, ADL, AFD, ASE, ASER, ASG, ASH, ASI, ASJ, ASK, AWA, AWB, AWC, germ line, I4 neuron, intestine, MSpaapaa, NSM, somatic gonad precursor	adult Ce, elongating embryo Ce, enclosing embryo Ce, fully-elongated embryo Ce, gastrulating embryo Ce, L1 larva Ce, L2 larva Ce, L3 larva Ce, L4 larva Ce, larva Ce	1-day post-L4 adult hermaphrodite Ce, 10-days post-L4 adult hermaphrodite Ce, 11-15 days post-L4 adult hermaphrodite Ce, 2-days post-L4 adult hermaphrodite Ce, 20-days post-L4 adult hermaphrodite Ce, 3-days post-L4 adult hermaphrodite Ce, 3-fold embryo Ce, 4-days post-L4 adult hermaphrodite Ce, 5-days post-L4 adult hermaphrodite Ce, 6-days post-L4 adult hermaphrodite Ce, 7-10 days post-L4 adult h…	orofacial cleft 10|By Orthology	HGNC:12502|Hieranoid;Panther;OrthoFinder;SonicParanoid;Inparanoid;OMA;OrthoInspector, HGNC:33148|Hieranoid;Panther;OrthoFinder;SonicParanoid;PhylomeDB;Inparanoid;OMA;OrthoInspector	chromosome, cytoplasm, cytoskeleton, embryo development ending in birth or egg hatching, identical protein binding, microtubule organizing center, mitotic metaphase plate congression, mitotic sister chromatid separation, multicellular organismal locomotion, muscle cell cellular homeostasis, negative regulation of transcription by RNA polymerase II, negative regulation of transcription, DNA-templa…	smo-1 encodes the C. elegans ortholog of SUMO, a small ubiquitin-like moiety that, when attached to protein substrates, regulates their subcellular localization and activity\; smo-1 is an essential gene: loss of its activity results in embryonic and larval lethality\; in addition, smo-1 mutants have defects in synaptonemal complex disassembly and bivalent formation, enhance meiotic defects of zhp…	Enables identical protein binding activity. Involved in several processes, including chromosome organization\; multicellular organismal locomotion\; and muscle cell cellular homeostasis. Predicted to be located in PML body. Expressed in several structures, including P3.p hermaphrodite\; P4.p hermaphrodite\; P8.p hermaphrodite\; hermaphrodite somatic gonadal cell\; and ventral nerve cord. Human or…	Enriched in germ line, AFD, ASER, somatic gonad precursor, ADF, ADL, ASE, ASG, ASH, ASI, ASJ, ASK, AWA, AWB, AWC, ABarapapaa, ABalpappaa, MSpaapaa, ABpraaappa, ABalpppppa, ABpraaappp, ABalpppppp, ABprpapppa, ABpraapaap, ABplaapaap, ABprapappp, ABplapappp, I4 neuron, NSM and intestine according to RNA-seq, single-cell RNA-seq and microarray. Affected by let-7, gld-1, alg-3, alg-4, tatn-1, lem-2, e…	WBPaper00002815|pmid9175795, WBPaper00006514|pmid15107848, WBPaper00010203|pmid N.A., WBPaper00018964|pmid N.A., WBPaper00019709|pmid N.A., WBPaper00023983|pmid N.A., WBPaper00024467|pmid15466489, WBPaper00025140|pmid15689373, WBPaper00026279|pmid N.A., WBPaper00026636|pmid15990876, WBPaper00026872|pmid16103211, WBPaper00027236|pmid18050486, WBPaper00027315|pmid18050424, WBPaper00028008|pmid N.A.…
chrV	10896880	10897135	256	2	179510	NM_073377	WBGene00001303	sec-61.G	Protein transport protein Sec61 subunit gamma	WBGene00001303	sec-61.G	Caenorhabditis elegans	protein_coding_gene	F32D8.6	oar-1, emo-1, CELE_F32D8.6	F32D8.6.1	CEOP5537	CE05785	CE05785|HMMPANTHER:PTHR12309:SF5|HMMPANTHER:PTHR12309|SCANPROSITE:PS01067|TIGRFAM:TIGR00327|PFAM:PF00584|SUPERFAMILY:SSF103456|INTERPRO:IPR001901|INTERPRO:IPR008158|INTERPRO:IPR023391	Q19967	Q19967	TF300232	NM_001392601.1	NP_001379136.1	V 2.83 +/- 0.00	sjj_F32D8.6, mv_F32D8.6, cenix:139-d1, mv_AAC47274	avoids bacterial lawn, distal tip cell morphology variant, embryonic lethal, larval arrest, maternal sterile, molt defect, reduced brood size, slow growth, transgene expression increased	diakinesis progression during oogenesis variant, embryonic lethal, sterile	gk572940|Substitution|Missense	pid-5|Physical, smo-1|Physical, spe-39|Physical, vps-45|Physical	germ line, head	ABplpppapa, ABprpppapa, AFD, anterior gonadal sheath cell, anterior spermatheca, ASER, body wall musculature, dorsal nerve cord, hermaphrodite distal tip cell, hypodermis, intestine, lateral nerve cord, male distal tip cell, male-specific anatomical entity, marginal cell, mc1DL, mc1DR, mc1V, mc3, nerve ring, pharynx, PLM, posterior gonadal sheath cell, Posterior spermatheca, PVW, somatic neuron, …	adult Ce	1-day post-L4 adult hermaphrodite Ce, 10-days post-L4 adult hermaphrodite Ce, 2-days post-L4 adult hermaphrodite Ce, 20-days post-L4 adult hermaphrodite Ce, 3-days post-L4 adult hermaphrodite Ce, 3-fold embryo Ce, 6-days post-L4 adult hermaphrodite Ce, 7-10 days post-L4 adult hermaphrodite Ce, adult Ce, adult hermaphrodite Ce, adult male Ce, all stages Ce, blastula embryo Ce, dauer larva Ce, embr…	N.A.	HGNC:18277|EnsEMBL-Compara;Hieranoid;Panther;OrthoFinder;SonicParanoid;PhylomeDB;Inparanoid;OMA;OrthoInspector	cell differentiation, endoplasmic reticulum membrane, endoplasmic reticulum, integral component of membrane, intracellular protein transport, membrane, oocyte growth, oogenesis, ovulation, post-translational protein targeting to membrane, translocation, protein targeting, protein transmembrane transporter activity, protein transport, protein-transporting ATPase activity, Sec61 translocon complex,…	emo-1 encodes an ortholog of S. cerevisiae Sec61p gamma subunit, which is required for translocation of secreted and membrane proteins into the endoplasmic reticulum\; EMO-1 is required for oogenesis and ovulation.	Predicted to enable protein-transporting ATPase activity. Involved in oocyte growth and ovulation. Predicted to be located in endoplasmic reticulum membrane. Predicted to be integral component of membrane. Predicted to be part of Sec61 translocon complex and Ssh1 translocon complex. Expressed in germ line. Is an ortholog of human SEC61G (SEC61 translocon subunit gamma).	Enriched in body wall musculature, vulval muscle, ventral nerve cord, nerve ring, dorsal nerve cord, somatic neuron, tail neuron, lateral nerve cord, pharynx, hypodermis, AFD, ASER, PLM, mc1V, mc1DR, mc1DL, mc3, ABprpppapa, ABplpppapa, marginal cell, hermaphrodite distal tip cell, male distal tip cell, anterior gonadal sheath cell, posterior gonadal sheath cell, PVW, anterior spermatheca, Posteri…	WBPaper00002519|pmid8707849, WBPaper00002644|pmid9013925, WBPaper00003792|pmid10791339, WBPaper00003831|pmid10588660, WBPaper00003990|pmid10822256, WBPaper00005541|pmid12391315, WBPaper00006236|pmid14551256, WBPaper00006404|pmid14718919, WBPaper00010929|pmid N.A., WBPaper00012575|pmid N.A., WBPaper00012622|pmid N.A., WBPaper00014929|pmid N.A., WBPaper00015283|pmid N.A., WBPaper00017564|pmid N.A.,…
chrIV	2641312	2642019	708	1	177047	NM_067837	WBGene00022075	Y69A2AR.3	Complex I-9kD	WBGene00022075	Y69A2AR.3	Caenorhabditis elegans	protein_coding_gene	Y69A2AR.3	CELE_Y69A2AR.3	Y69A2AR.3.1	CEOP4064	CE27518	CE27518|PFAM:PF15880|INTERPRO:IPR026193	Q95XG6	Q95XG6	TF314773	NM_067837.5	NP_500238.1	IV -6.796419	N.A.	N.A.	N.A.	gk196488|Substitution|Missense	myrf-2|Physical, spe-39|Physical, vps-45|Physical	N.A.	AFD, ASER, hypodermis, Psub1	N.A.	1-day post-L4 adult hermaphrodite Ce, 2-cell embryo Ce, 2-days post-L4 adult hermaphrodite Ce, 3-days post-L4 adult hermaphrodite Ce, 3-fold embryo Ce, 6-days post-L4 adult hermaphrodite Ce, adult Ce, adult hermaphrodite Ce, all stages Ce, blastula embryo Ce, dauer larva Ce, embryo Ce, L1 larva Ce, L2 larva Ce, L2d larva Ce, L3 larva Ce, L4 larva Ce, larva Ce	N.A.	N.A.	membrane, mitochondrial respiratory chain complex I, mitochondrion	N.A.	Predicted to be located in membrane and mitochondrion. Predicted to be part of mitochondrial respiratory chain complex I.	Enriched in hypodermis, Psub1, AFD and ASER according to tiling array and RNA-seq. Affected by cyc-1, aak-2, lin-15B, rsr-2, let-7, gld-1, prg-1, crtc-1, hyl-2, hsf-1, mir-34, morc-1, sma-2, sma-4, lin-22, pmt-2, unc-70, mex-1, cfp-1, set-6, baz-2, let-418, unc-30, cdk-4, cyd-1, gei-8 and daf-16 according to microarray, RNA-seq and proteomic study. Affected by rotenone, D-glucose, Psoralens, metf…	N.A.
chrI	535808	536493	686	1	171646	NM_001306344	WBGene00022042	icd-2	Nascent polypeptide-associated complex subunit alpha	WBGene00022042	icd-2	Caenorhabditis elegans	protein_coding_gene	Y65B4BR.5	CELE_Y65B4BR.5	Y65B4BR.5.1	CEOP1934	CE22740	CE22740|PhosphoPep:Y65B4BR.5|HMMPANTHER:PTHR21713|HMMPANTHER:PTHR21713:SF1|PFSCAN:PS51151|PIRSF:PIRSF015901|SMART:SM01407|PFAM:PF19026|PFAM:PF01849|INTERPRO:IPR002715|INTERPRO:IPR016641|INTERPRO:IPR038187|INTERPRO:IPR044034	Q86S66	Q86S66	N.A.	NM_058348.6	NP_490749.1	I -18.96	sjj_Y65B4B_10.d|I-8A11, smd_Y65B4B_10.d, sjj_Y65B4B_10.b|I-8A07, mv_Y65B4BR.5, cenix:77-d3	avoids bacterial lawn, cytoplasmic processing body variant, distal tip cell migration variant, dumpy, embryonic lethal, extended life span, fat content increased, gonad development variant, growth variant, high incidence male progeny, larval arrest, locomotion variant, male gonad development variant, male somatic gonad development variant, maternal sterile, molt defect, no induction of antimicrob…	lethal, sterile	tm3125|Deletion|Inframe_deletion, gk101148|Substitution|Missense, gk323931|Substitution|Missense, gk335333|Substitution|Missense, gk640085|Substitution|Missense, gk721933|Substitution|Missense	icd-1|Physical;Regulatory, aak-2|Physical, atf-6|Genetic, cdc-42|Physical, dcr-1|Physical, dlg-1|Physical, erh-2|Physical, exp-2|Physical, F49E8.7|Physical, hsp-4|Regulatory, icd-2|Physical, icd-2|Physical, ire-1|Genetic, let-413|Physical, lgl-1|Physical, madf-9|Physical, mdl-1|Regulatory, mdt-11|Physical, met-2|Physical, mut-16|Physical, myrf-1|Physical, myrf-2|Physical, nmad-1|Physical, nrde-2|…	intestinal cell, muscle cell	anterior spermatheca, germ line, hermaphrodite distal tip cell, M cell, male distal tip cell, muscle cell, NSM, OLL, Posterior spermatheca, PVD, sensory neuron, somatic gonad precursor	N.A.	1-day post-L4 adult hermaphrodite Ce, 2-days post-L4 adult hermaphrodite Ce, 3-days post-L4 adult hermaphrodite Ce, 3-fold embryo Ce, 4-days post-L4 adult hermaphrodite Ce, 6-days post-L4 adult hermaphrodite Ce, 7-10 days post-L4 adult hermaphrodite Ce, adult Ce, adult hermaphrodite Ce, adult male Ce, all stages Ce, blastula embryo Ce, dauer larva Ce, embryo Ce, L1 larva Ce, L2 larva Ce, L2d larv…	N.A.	HGNC:7629|EnsEMBL-Compara;PhylomeDB;Panther;OrthoInspector, HGNC:22196|OrthoFinder;Panther;PhylomeDB;OrthoInspector, HGNC:24688|EnsEMBL-Compara;Hieranoid;Panther;SonicParanoid;PhylomeDB;Inparanoid;OMA;OrthoInspector, HGNC:23290|Hieranoid;Panther;SonicParanoid;PhylomeDB;Inparanoid;OMA;OrthoInspector	cytoplasm, nascent polypeptide-associated complex, protein binding, protein targeting to membrane, protein transport, unfolded protein binding	N.A.	Predicted to enable unfolded protein binding activity. Predicted to be involved in protein targeting to membrane. Predicted to be located in cytoplasm. Predicted to be part of nascent polypeptide-associated complex. Expressed in intestinal cell. Is an ortholog of human NACA4P (NACA family member 4, pseudogene).	Enriched in PVD, OLL, NSM, germ line, somatic gonad precursor, sensory neuron, M cell, hermaphrodite distal tip cell, male distal tip cell, anterior spermatheca, Posterior spermatheca and muscle cell according to microarray, RNA-seq and single-cell RNA-seq. Affected by dcr-1, atx-3, daf-12, daf-2, daf-16, tatn-1, ZK1236.1, cdc-48.2, lin-35, glp-1, glh-4, glh-1, pgl-1, pgl-3, emb-4, sma-2, sma-4, …	WBPaper00028360|pmid16897684, WBPaper00029254|pmid17411345, WBPaper00038491|pmid21647448, WBPaper00041512|pmid22957041, WBPaper00043951|pmid23604074, WBPaper00048178|pmid N.A., WBPaper00048416|pmid26223767, WBPaper00049828|pmid27405932, WBPaper00055090|pmid30120140, WBPaper00056909|pmid31214513
chrIV	7790104	7791228	1125	2	177566	NM_171383	WBGene00004703	rsp-6	putative splicing factor, arginine/serine-rich 6	WBGene00004703	rsp-6	Caenorhabditis elegans	protein_coding_gene	C33H5.12	srp-1, CeSRp20, CELE_C33H5.12	C33H5.12b, C33H5.12c, C33H5.12a.1	CEOP4252	CE04155	CE04155|HMMPANTHER:PTHR23147|HMMPANTHER:PTHR23147:SF76|PFSCAN:PS50102|SMART:SM00360|PFAM:PF00076|SUPERFAMILY:SSF54928|INTERPRO:IPR000504|INTERPRO:IPR012677|INTERPRO:IPR035979	Q18409	Q18409	TF351858	NM_171383.6, NR_131573.1, NR_131574.1	NP_741446.1	IV 3.48 +/- 0.00	sjj_C33H5.12|IV-3P06, cenix:84-c7, mv_C33H5.12	cell proliferation increased, dumpy, embryonic lethal, embryonic lethal late emb, embryonic morphology variant, excess intestinal cells, exploded through vulva, gonad development variant, gonad morphology variant, gut obstructed, intestinal morphology variant, larval arrest, larval lethal, locomotion variant, multivulva, oogenesis variant, protruding vulva, slow growth, somatic gonad morphology v…	body morphology variant, dendritic termini number reduced, fertility reduced, mRNA levels increased, RNA processing variant	gk206104|Substitution|Nonsense, gk206106|Substitution|Missense, gk206107|Substitution|Missense, gk764516|Substitution|Missense	ain-1|Physical, csr-1|Physical, mpk-1|Physical, nrde-2|Physical, rbm-39|Physical, rnp-5|Physical, zen-4|Physical	Cell, intestine, PVDL, PVDR	AVK, germ line, head mesodermal cell, NSM	adult Ce, embryo Ce	1-day post-L4 adult hermaphrodite Ce, 10-days post-L4 adult hermaphrodite Ce, 2-days post-L4 adult hermaphrodite Ce, 20-days post-L4 adult hermaphrodite Ce, 3-days post-L4 adult hermaphrodite Ce, 3-fold embryo Ce, 4-days post-L4 adult hermaphrodite Ce, 5-days post-L4 adult hermaphrodite Ce, 6-days post-L4 adult hermaphrodite Ce, 7-10 days post-L4 adult hermaphrodite Ce, 7-days post-L4 adult herma…	ovary epithelial cancer|By Orthology, bipolar disorder|By Orthology, clear cell renal cell carcinoma|By Orthology	HGNC:10785|Panther;OrthoFinder;SonicParanoid;Inparanoid;OMA;OrthoInspector, HGNC:10789|Hieranoid;Panther;OrthoFinder;SonicParanoid;Inparanoid;OMA;OrthoInspector	cell differentiation, gonad development, mRNA binding, mRNA processing, mRNA splicing, via spliceosome, nuclear speck, nucleic acid binding, nucleus, regulation of DNA-templated transcription, termination, RNA binding, RNA splicing, sex differentiation	rsp-6 encodes an RNA binding protein that is the C. elegans ortholog of the vertebrate SFRS3\/SRp20 pre-mRNA splicing factors\; although loss of rsp-6 activity alone results in no obvious abnormalities, RNAi experiments targeting multiple RSP proteins indicate that, in combination with other RSP proteins, RSP-6 plays a role in embryonic and larval development, germline sex determination (sperm-oo…	Predicted to enable mRNA binding activity. Involved in gonad development and regulation of DNA-templated transcription, termination. Located in nucleus. Expressed in several structures, including PVDL and PVDR. Human ortholog(s) of this gene implicated in bipolar disorder\; clear cell renal cell carcinoma\; and ovary epithelial cancer. Is an ortholog of human SRSF7 (serine and arginine rich splic…	Enriched in germ line, NSM, AVK and head mesodermal cell according to proteomic study, RNA-seq, tiling array and single-cell RNA-seq. Affected by cyc-1, daf-16, smg-2, tatn-1, gld-2, clk-1, rsks-1, npr-1, jmjd-3.1, hsf-1, ifg-1, alg-1, alg-2, fog-2, emb-4, sma-2, sma-4, lin-22, daf-2, isp-1, nuo-6, pry-1, aak-1, aak-2, iff-1, set-6, baz-2, egl-43, mut-16, srbc-48, cox-5B, bcat-1, hlh-11, sir-2.1,…	WBPaper00003988|pmid10747030, WBPaper00004261|pmid10906451, WBPaper00010247|pmid N.A., WBPaper00022755|pmid N.A., WBPaper00028451|pmid16943775, WBPaper00029295|pmid17437990, WBPaper00032289|pmid18946043, WBPaper00038491|pmid21647448, WBPaper00040135|pmid21874007, WBPaper00046432|pmid25673135, WBPaper00049828|pmid27405932, WBPaper00055090|pmid30120140, WBPaper00061991|pmid34593637, WBPaper00064064…
chrIV	17088059	17088570	512	1	178483	NM_070626	WBGene00004914	snr-1	Small nuclear ribonucleoprotein Sm D3	WBGene00004914	snr-1	Caenorhabditis elegans	protein_coding_gene	Y116A8C.42	CELE_Y116A8C.42	Y116A8C.42.1	N.A.	CE23346	CE23346|HMMPANTHER:PTHR23338|HMMPANTHER:PTHR23338:SF17|SMART:SM00651|PFAM:PF01423|SUPERFAMILY:SSF50182|INTERPRO:IPR001163|INTERPRO:IPR010920|INTERPRO:IPR027141	Q17348	Q17348	TF354302	NM_070626.7	NP_503027.1	IV 16.13 +/- 0.01	mv_Y116A8C.42, sjj_Y116A8C.42|IV-8K09, cenix:38-f4	accumulated germline cell corpses, apoptosis increased, apoptosis variant, avoids bacterial lawn, cell membrane organization biogenesis variant, cell proliferation increased, cell secretion variant, chromosome condensation variant, diakinesis progression during oogenesis variant, diplotene progression during oogenesis variant, embryo osmotic integrity defective early emb, embryonic arrest, embryo…	N.A.	gk222707|Substitution|Missense, gk222708|Substitution|Missense, gk312454|Substitution|Missense, gk454462|Substitution|Missense, gk796658|Substitution|Missense, gk894757|Substitution|Missense, gk918485|Substitution|Missense	gpdh-1|Regulatory, gyf-1|Physical, hsp-6|Regulatory, icln-1|Physical, let-711|Physical, lin-15A|Genetic, lin-53|Physical, nrde-2|Physical, pid-3|Physical, rde-8|Physical, rsr-2|Physical, sart-3|Physical, sec-6|Physical, smo-1|Physical, zen-4|Physical	anal depressor muscle, body region, body wall musculature, coelomocyte, germ line, gonad, head, hypodermis, mu_int_L, mu_int_R, pharyngeal-intestinal valve, pharynx, seam cell, tail	ABalpapppa, ABalppppppa, ABarapappa, ABarppaapp, ABarpppapp, ABplaapapa, ABplpaapap, ABpraaapppa, ABpraapapa, ABprpaapap, AFD, Caapa, DA neuron, germ line, I5 neuron, NSM, retrovesicular ganglion, SAB, somatic gonad precursor, VA neuron	adult Ce, embryo Ce, L1 larva Ce, L2 larva Ce, L3 larva Ce, L4 larva Ce, larva Ce	1-day post-L4 adult hermaphrodite Ce, 10-days post-L4 adult hermaphrodite Ce, 2-days post-L4 adult hermaphrodite Ce, 20-days post-L4 adult hermaphrodite Ce, 3-days post-L4 adult hermaphrodite Ce, 3-fold embryo Ce, 6-days post-L4 adult hermaphrodite Ce, 7-10 days post-L4 adult hermaphrodite Ce, adult Ce, adult hermaphrodite Ce, adult male Ce, all stages Ce, blastula embryo Ce, dauer larva Ce, embr…	systemic lupus erythematosus|By Orthology	HGNC:11160|EnsEMBL-Compara;Hieranoid;Panther;OrthoFinder;SonicParanoid;PhylomeDB;Inparanoid;OMA;OrthoInspector	catalytic step 2 spliceosome, commitment complex, cytoplasm, cytosol, mRNA processing, nucleus, P granule, pICln-Sm protein complex, precatalytic spliceosome, ribonucleoprotein complex, RNA binding, RNA processing, RNA splicing, SMN-Sm protein complex, spliceosomal complex, spliceosomal snRNP assembly, spliceosomal tri-snRNP complex, U1 snRNP, U12-type spliceosomal complex, U2 snRNP, U4 snRNP, U5…	snr-1 encodes an ortholog of human small nuclear ribonucleoprotein Sm D3, a protein that forms part of a heptameric complex required for the biogenesis and function of the snRNPs that catalyze mRNA splicing\; in combination with the gene that encodes the human Sm B ortholog (snr-2) snr-1 affects embryonic viability and the nuclear association and localization of P granules in embryos based on an …	Predicted to enable RNA binding activity. Predicted to be involved in spliceosomal snRNP assembly. Located in P granule. Expressed in germ line\; gonad\; head\; and tail. Human ortholog(s) of this gene implicated in systemic lupus erythematosus. Is an ortholog of human SNRPD3 (small nuclear ribonucleoprotein D3 polypeptide).	Enriched in NSM, AFD, germ line, somatic gonad precursor, ABprpaapap, ABplpaapap, ABpraaapppa, ABalppppppa, Caapa, ABarapappa, ABalpapppa, ABarppaapp, ABarpppapp, ABpraapapa, ABplaapapa, I5 neuron, DA neuron, SAB, retrovesicular ganglion and VA neuron according to RNA-seq, single-cell RNA-seq and microarray. Affected by rsr-2, let-7, gld-1, tatn-1, clk-1, npr-1, cox-5B, jmjd-3.1, jmjd-1.2, hsf-1,…	WBPaper00005457|pmid12225665, WBPaper00026926|pmid16254074, WBPaper00038491|pmid21647448, WBPaper00040897|pmid22426005, WBPaper00046572|pmid25753661, WBPaper00049828|pmid27405932, WBPaper00055090|pmid30120140, WBPaper00064034|pmid35536193
chrI	4583942	4584491	550	2	172061	NM_058997	WBGene00004479	rps-10	S10_plectin domain-containing protein	WBGene00004479	rps-10	Caenorhabditis elegans	protein_coding_gene	D1007.6	CELE_D1007.6	D1007.6.1	CEOP1184	CE09041	CE09041|HMMPANTHER:PTHR12146|PFAM:PF03501|INTERPRO:IPR005326|INTERPRO:IPR036388|INTERPRO:IPR037447	O01869	O01869	TF319100	NM_058997.8	NP_491398.1	I -1.04	mv_G_YK2460, sjj_D1007.6|I-2A19, cenix:122-h2	apoptosis fails to occur, apoptosis reduced, cell membrane organization biogenesis variant, diplotene absent during oogenesis, early larval arrest, embryonic lethal, extended life span, germ cell compartment expansion absent, germ cell compartment expansion variant, germ cell compartment morphology variant, gonad small, larval arrest, locomotion variant, lysosome-related organelle morphology vari…	N.A.	gk379171|Substitution|Missense	C15H9.4|Physical, cdc-42|Physical, cep-1|Genetic, csr-1|Physical, dlg-1|Physical, dve-1|Physical, erh-2|Physical, glh-1|Physical, hcp-3|Physical, lin-53|Physical, madf-9|Physical, myrf-1|Physical, myrf-2|Physical, nrde-2|Physical, pah-1|Physical, pan-1|Physical, pid-3|Physical, pqn-59|Physical, prg-1|Physical, rack-1|Physical, rps-3|Physical, sip-1|Physical, smo-1|Physical, spc-1|Physical, tofu-6…	N.A.	ADA, ADE, AFD, anterior spermatheca, ASER, excretory cell, excretory gland cell, germ line, hermaphrodite distal tip cell, I4 neuron, IL2DL, IL2DR, IL2VL, IL2VR, M cell, m2L, m2R, male distal tip cell, NSM, PLM, Posterior spermatheca, RIG, RIH, somatic gonad precursor	N.A.	1-day post-L4 adult hermaphrodite Ce, 10-days post-L4 adult hermaphrodite Ce, 11-15 days post-L4 adult hermaphrodite Ce, 2-days post-L4 adult hermaphrodite Ce, 20-days post-L4 adult hermaphrodite Ce, 3-days post-L4 adult hermaphrodite Ce, 6-days post-L4 adult hermaphrodite Ce, adult Ce, adult hermaphrodite Ce, adult male Ce, all stages Ce, dauer larva Ce, embryo Ce, L1 larva Ce, L2 larva Ce, L2d …	Diamond-Blackfan anemia 9|By Orthology	HGNC:10383|Hieranoid;Panther;OrthoFinder;SonicParanoid;PhylomeDB;Inparanoid;OMA;OrthoInspector, HGNC:15795|Hieranoid;Panther;OrthoFinder;SonicParanoid;PhylomeDB;Inparanoid;OMA;OrthoInspector	cytosolic small ribosomal subunit, determination of adult lifespan, protein binding, RNA binding, structural constituent of ribosome	rps-10 encodes a small (40S) ribosomal subunit S10 protein\; loss of rps-10 activity in adult animals extends lifespan.	Predicted to enable RNA binding activity. Predicted to be a structural constituent of ribosome. Involved in determination of adult lifespan. Predicted to be part of cytosolic small ribosomal subunit. Human ortholog(s) of this gene implicated in Diamond-Blackfan anemia 9. Is an ortholog of human RPS10 (ribosomal protein S10) and RPS10P5 (ribosomal protein S10 pseudogene 5).	Enriched in germ line, AFD, ASER, PLM, somatic gonad precursor, excretory cell, M cell, ADA, ADE, hermaphrodite distal tip cell, male distal tip cell, excretory gland cell, I4 neuron, IL2VR, IL2VL, IL2DR, IL2DL, m2R, m2L, NSM, RIG, RIH, anterior spermatheca and Posterior spermatheca according to proteomic study, RNA-seq and single-cell RNA-seq. Affected by aak-2, daf-12, K10D11.2, daf-2, let-7, g…	WBPaper00028451|pmid16943775, WBPaper00029008|pmid17266679, WBPaper00035215|pmid19763173, WBPaper00038491|pmid21647448, WBPaper00055090|pmid30120140
chrIII	2172848	2172957	110	1	260237	NR_000277	WBGene00003292	mir-64	ncRNA	WBGene00003292	mir-64	Caenorhabditis elegans	miRNA_gene	Y48G9A.13	cel-mir-64, Cel-Mir-65-P2, CELE_Y48G9A.13	Y48G9A.13, Y48G9A.13a, Y48G9A.13b	N.A.	N.A.	N.A.	N.A.	N.A.	N.A.	NR_000277.2	N.A.	III -15.063450	N.A.	N.A.	gene expression level high, gene expression level reduced, male tail sensory ray development variant, protein phosphorylation reduced	N.A.	N.A.	N.A.	N.A.	adult Ce, embryo Ce, L1 larva Ce, L2 larva Ce, L3 larva Ce, L4 larva Ce	N.A.	Parkinson's disease|By Experiment	N.A.	N.A.	mir-64 encodes a microRNA (miRNA), a small noncoding RNA that is likely involved in post-transcriptional regulation of gene expression\; miR-64 is expressed at high levels during all developmental stages and in glp-4 mutant hermaphrodites lacking a germline\; miR-64 is also detected in him-8 mutants, starved L1 larvae, and dauer larvae\; miR-64 does not appear to have orthologs in other species, …	Is affected by several genes including eat-2\; prg-1\; and alg-1 based on RNA-seq studies. Is affected by multi-walled carbon nanotube based on RNA-seq studies. Used to study Parkinson's disease.	Affected by prg-1, eat-2, glh-1, alg-1, alg-2, alg-5, mir-71 and mrps-5 according to RNA-seq. Affected by multi-walled carbon nanotube according to RNA-seq.	WBPaper00004927|pmid11679671, WBPaper00005825|pmid12672692, WBPaper00024441|pmid15317971, WBPaper00031335|pmid18085825, WBPaper00031700|pmid18413715, WBPaper00033207|pmid19460142, WBPaper00035654|pmid20091141, WBPaper00035664|pmid20096582, WBPaper00037982|pmid21210060
chrII	11978434	11979543	1110	2	174837	NM_001129179	WBGene00012471	Y17G7B.20	Uncharacterized protein	WBGene00012471	Y17G7B.20	Caenorhabditis elegans	protein_coding_gene	Y17G7B.20	CELE_Y17G7B.20	Y17G7B.20a.1, Y17G7B.20a.2, Y17G7B.20a.3, Y17G7B.20b.1, Y17G7B.20c.1, Y17G7B.20c.2, Y17G7B.20c.3	CEOP2582	N.A.	N.A.	A8XJ46, A8XJ47, Q8I4E8	Q8I4E8	TF105008	NM_001129179.3, NM_001393207.1, NM_001393206.1	NP_001122651.1, NP_001379323.1, NP_001379482.1	II 5.451933	N.A.	dumpy, sick, slow growth, small, sterile progeny, transgene expression increased	N.A.	tm10035|Deletion|Frameshift, gk156354|Substitution|Missense, gk156355|Substitution|Missense, gk156356|Substitution|Missense, gk156357|Substitution|Missense, gk402501|Substitution|Missense, gk432171|Substitution|Missense, gk621837|Substitution|Missense, gk631634|Substitution|Missense, gk650280|Substitution|Missense, gk717795|Substitution|Missense, gk746783|Substitution|Missense, gk770901|Substitut…	acdh-2|Regulatory, Y17G7B.20|Physical, Y17G7B.20|Physical	N.A.	ABalpapaap, ABalppppppa, ABarappaap, ABarpapaaa, ABplaaaaaa, ABplaapaaa, ABplaapaap, ABplpaaaap, ABplpaaapa, ABplpappaa, ABplppaapa, ABpraaapppa, ABpraapaaa, ABpraapaap, ABprpaaaap, ABprpaaapa, ABprppaapa, AVK, body wall muscle cell, coelomocyte, germ line, I4 neuron, m2L, m2R, MCL, MCR, MI neuron, NSM, OLL, PVD, sensory neuron	N.A.	1-cell embryo Ce, 1-day post-L4 adult hermaphrodite Ce, 2-days post-L4 adult hermaphrodite Ce, 3-days post-L4 adult hermaphrodite Ce, 3-fold embryo Ce, 4-cell embryo Ce, 4-days post-L4 adult hermaphrodite Ce, 6-days post-L4 adult hermaphrodite Ce, 7-10 days post-L4 adult hermaphrodite Ce, adult Ce, adult hermaphrodite Ce, adult male Ce, all stages Ce, dauer larva Ce, embryo Ce, L1 larva Ce, L2 la…	N.A.	N.A.	N.A.	N.A.	Enriched in several structures, including AVK\; coelomocyte\; germ line\; pharyngeal neurons\; and sensory neurons based on microarray\; tiling array\; RNA-seq\; and single-cell RNA-seq studies. Is affected by several genes including daf-12\; hsf-1\; and gld-1 based on microarray and RNA-seq studies. Is affected by four chemicals including Aspirin\; Rifampin\; and Sirolimus based on RNA-seq and m…	Enriched in PVD, OLL, body wall muscle cell, coelomocyte, NSM, germ line, AVK, sensory neuron, ABpraaapppa, ABalppppppa, ABplpappaa, ABpraapaap, ABplaapaap, ABplpaaaap, ABprpaaaap, ABalpapaap, ABarappaap, ABpraapaaa, ABplaapaaa, ABprppaapa, ABplppaapa, ABplpaaapa, ABprpaaapa, ABarpapaaa, ABplaaaaaa, I4 neuron, m2R, m2L, MCR, MCL and MI neuron according to microarray, tiling array, RNA-seq and sin…	N.A.
chrII	10658148	10658614	467	2	174645	NM_063899	WBGene00010896	snu-13	NHP2-like protein 1 homolog	WBGene00010896	snu-13	Caenorhabditis elegans	protein_coding_gene	M28.5	phi-9, CELE_M28.5	M28.5.1	CEOP2500	CE02283	CE02283|HMMPANTHER:PTHR23105:SF158|HMMPANTHER:PTHR23105|PRINTS:PR00883|PRINTS:PR00881|SCANPROSITE:PS01082|PFAM:PF01248|SUPERFAMILY:SSF55315|INTERPRO:IPR002415|INTERPRO:IPR004038|INTERPRO:IPR018492|INTERPRO:IPR029064	Q21568	Q21568	TF300184	NM_001393180.1	NP_001379076.1	II 3.12	sjj_M28.5|II-7M22, mv_G_YK2227, cenix:210-f11	cell proliferation increased, embryonic lethal, excess intestinal cells, larval arrest, larval lethal, lethal, maternal sterile, organism morphology variant, pattern of transgene expression variant, protein aggregation variant, receptor mediated endocytosis defective, sick, transgene subcellular localization variant	N.A.	tm6242|Deletion|Frameshift, gk153379|Substitution|Missense, gk153380|Substitution|Missense, gk549064|Substitution|Missense, gk931481|Substitution|Missense	ain-1|Physical, alg-1|Physical, cdc-42|Physical, dlg-1|Physical, fog-1|Regulatory, gld-1|Regulatory, let-413|Physical, myrf-1|Physical, myrf-2|Physical, par-3|Physical, pid-3|Physical, sip-1|Physical, smo-1|Physical, spc-1|Physical, spe-39|Physical, vps-45|Physical, zen-4|Physical	N.A.	DA neuron, germ line, I5 neuron, intestine, M cell, NSM, retrovesicular ganglion, SAB, somatic gonad precursor, VA neuron	N.A.	1-day post-L4 adult hermaphrodite Ce, 10-days post-L4 adult hermaphrodite Ce, 11-15 days post-L4 adult hermaphrodite Ce, 2-days post-L4 adult hermaphrodite Ce, 20-days post-L4 adult hermaphrodite Ce, 3-days post-L4 adult hermaphrodite Ce, 3-fold embryo Ce, 5-days post-L4 adult hermaphrodite Ce, 6-days post-L4 adult hermaphrodite Ce, 7-10 days post-L4 adult hermaphrodite Ce, adult Ce, adult hermap…	N.A.	HGNC:7819|EnsEMBL-Compara;Hieranoid;Panther;OrthoFinder;SonicParanoid;PhylomeDB;Inparanoid;OMA;OrthoInspector	box C/D RNP complex, maturation of LSU-rRNA, maturation of SSU-rRNA, mRNA processing, mRNA splicing, via spliceosome, nucleolus, nucleus, precatalytic spliceosome, ribonucleoprotein complex, RNA binding, RNA splicing, small-subunit processome, spliceosomal complex, U4/U6 x U5 tri-snRNP complex	N.A.	Predicted to enable RNA binding activity. Predicted to be involved in mRNA splicing, via spliceosome\; maturation of LSU-rRNA\; and maturation of SSU-rRNA. Predicted to be located in nucleolus. Predicted to be part of ribonucleoprotein complex. Is an ortholog of human SNU13 (small nuclear ribonucleoprotein 13).	Enriched in germ line, NSM, somatic gonad precursor, M cell, I5 neuron, DA neuron, SAB, retrovesicular ganglion, intestine and VA neuron according to RNA-seq, single-cell RNA-seq and microarray. Affected by K10D11.2, daf-2, daf-16, let-7, gld-1, tatn-1, clk-1, cox-5B, jmjd-3.1, jmjd-1.2, hsf-1, rbr-2, mir-34, glh-4, glh-1, pgl-1, pgl-3, atm-1, smo-1, isp-1, nuo-6, pry-1, nhl-2, mina-1, aak-1, aak…	WBPaper00031949|pmid18547420, WBPaper00038491|pmid21647448, WBPaper00049828|pmid27405932, WBPaper00055090|pmid30120140
chrV	15000768	15001968	1201	2	179999	NM_074290	WBGene00001423	fib-1	rRNA 2'-O-methyltransferase fibrillarin	WBGene00001423	fib-1	Caenorhabditis elegans	protein_coding_gene	T01C3.7	CELE_T01C3.7	T01C3.7.1, T01C3.7.2	CEOP5428	CE12920	CE12920|PhosphoPep:T01C3.7|HMMPANTHER:PTHR10335|HMMPANTHER:PTHR10335:SF4|PRINTS:PR00052|SCANPROSITE:PS00566|SMART:SM01206|PFAM:PF01269|SUPERFAMILY:SSF53335|INTERPRO:IPR000692|INTERPRO:IPR029063	Q22053	Q22053	TF300639	NM_074290.7	NP_506691.1	V 7.13 +/- 0.00	sjj_T01C3.7|V-9D24, cenix:11-g4, mv_T01C3.7	cytoplasmic processing body variant, diakinesis region organization variant, diplotene region organization variant, embryonic lethal, germ cell compartment expansion variant, gonad degenerate, gonad migration variant, gonad small, larval arrest, larval lethal, maternal sterile, nuclei small, oocyte number decreased, pachytene region organization variant, rachis absent, rachis narrow, sick, slow e…	N.A.	gk254868|Substitution|Missense, gk254872|Substitution|Missense, gk254873|Substitution|Missense, gk376729|Substitution|Missense, gk392535|Substitution|Missense, gk545551|Substitution|Missense, gk565835|Substitution|Missense, gk675991|Substitution|Missense, gk697786|Substitution|Missense, gk783890|Substitution|Missense, gk906378|Substitution|Missense, gk917613|Substitution|Missense, gk936898|Substi…	alg-1|Physical, apm-1|Regulatory, aps-1|Regulatory, cdc-42|Physical, cey-1|Physical, chc-1|Regulatory, dlg-1|Physical, erh-2|Physical, gld-1|Physical, glh-1|Physical, let-413|Physical, lgl-1|Physical, lin-53|Physical, myrf-1|Physical, myrf-2|Physical, ncl-1|Regulatory, nol-56|Physical, nrde-2|Physical, nxf-1|Physical, pan-1|Physical, par-3|Physical, pid-3|Physical, rsr-2|Physical, sec-6|Physical,…	N.A.	germ line, hermaphrodite-specific anatomical entity, intestine, M cell, somatic gonad precursor	N.A.	1-cell embryo Ce, 1-day post-L4 adult hermaphrodite Ce, 10-days post-L4 adult hermaphrodite Ce, 11-15 days post-L4 adult hermaphrodite Ce, 14-days post-L4 adult hermaphrodite Ce, 15-days post-L4 adult hermaphrodite Ce, 16-18 days post-L4 adult hermaphrodite Ce, 2-days post-L4 adult hermaphrodite Ce, 20-days post-L4 adult hermaphrodite Ce, 3-days post-L4 adult hermaphrodite Ce, 3-fold embryo Ce, 6…	N.A.	HGNC:3599|EnsEMBL-Compara;Hieranoid;Panther;OrthoFinder;SonicParanoid;Inparanoid;OMA;OrthoInspector, HGNC:35458|EnsEMBL-Compara;Panther;OrthoFinder;SonicParanoid;PhylomeDB;Inparanoid	box C/D RNA 3'-end processing, box C/D RNP complex, Cajal body, histone glutamine methylation, histone-glutamine methyltransferase activity, methylation, methyltransferase activity, nucleologenesis, nucleolus, nucleoplasm, nucleus, positive regulation of translation, ribonucleoprotein complex, RNA binding, rRNA methylation, rRNA methyltransferase activity, rRNA processing, small-subunit processom…	fib-1 encodes the C. elegans ortholog of fibrillarin and Saccharomyces cerevisiae Nop1p, an essential component of the U3 SnoRNP\; FIB-1 localizes to the nucleolus.	Predicted to enable RNA binding activity\; histone-glutamine methyltransferase activity\; and rRNA methyltransferase activity. Involved in nucleologenesis and positive regulation of translation. Located in nucleolus and nucleoplasm. Is an ortholog of human FBL (fibrillarin).	Enriched in germ line, somatic gonad precursor, M cell, hermaphrodite-specific anatomical entity and intestine according to RNA-seq, single-cell RNA-seq and microarray. Affected by zfp-1, cyc-1, aak-2, K10D11.2, rsr-2, daf-2, daf-16, eat-2, tatn-1, csr-1, clk-1, tdp-1, cdc-48.2, lin-35, cox-5B, jmjd-3.1, unc-75, hsf-1, rbr-2, lmn-1, mir-34, dep-1, dpy-21, glh-4, glh-1, pgl-1, pgl-3, emb-4, sma-4,…	WBPaper00002153|pmid7732590, WBPaper00005697|pmid12560808, WBPaper00006468|pmid14872060, WBPaper00030479|pmid N.A., WBPaper00031746|pmid N.A., WBPaper00031949|pmid18547420, WBPaper00032197|pmid18804378, WBPaper00033966|pmid N.A., WBPaper00035928|pmid20149852, WBPaper00035940|pmid19840506, WBPaper00037974|pmid21196318, WBPaper00038491|pmid21647448, WBPaper00041088|pmid22577294, WBPaper00041268|pmi…
chrI	14468479	14468940	462	2	173309	NM_170948	WBGene00004489	rps-20	40S ribosomal protein S20	WBGene00004489	rps-20	Caenorhabditis elegans	protein_coding_gene	Y105E8A.16	Y105E8E.s, Y105E8E.s, CELE_Y105E8A.16	Y105E8A.16.1	CEOP1732	CE29835	CE29835|PhosphoPep:Y105E8A.16|HMMPANTHER:PTHR11700:SF8|HMMPANTHER:PTHR11700|PRINTS:PR00971|SMART:SM01403|TIGRFAM:TIGR01046|PFAM:PF00338|SUPERFAMILY:SSF54999|INTERPRO:IPR001848|INTERPRO:IPR005729|INTERPRO:IPR027486|INTERPRO:IPR036838	Q8WQA8	Q8WQA8	TF300222	NM_170948.8	NP_740944.1	I 25.72 +/- 0.00	mv_Y105E8E.s, sjj_Y105E8C.e|I-7O07, cenix:172-f1	apoptosis reduced, avoids bacterial lawn, diplotene absent during oogenesis, early larval arrest, embryonic lethal, embryonic terminal arrest variable emb, extended life span, germ cell compartment expansion absent, germ cell compartment expansion variant, gonad small, gonad vesiculated, larval arrest, larval lethal, maternal sterile, no oocytes, nuclei small, oocyte number decreased, pachytene p…	N.A.	gk129339|Substitution|Missense, gk333159|Substitution|Missense, gk350966|Substitution|Missense, gk933645|Substitution|Missense	alg-1|Physical, cacn-1|Physical, cdc-42|Physical, csr-1|Physical, dlg-1|Physical, erh-2|Physical, hmg-3|Physical, let-413|Physical, lgl-1|Physical, malt-1|Physical, myrf-1|Physical, myrf-2|Physical, nmad-1|Physical, nrde-2|Physical, pan-1|Physical, par-3|Physical, pid-3|Physical, pqn-59|Physical, prg-1|Physical, sec-6|Physical, smo-1|Physical, spc-1|Physical, tofu-6|Physical, tost-1|Physical, unc…	N.A.	ADA, AFD, anterior spermatheca, ASER, AVG, CAN, excretory cell, excretory gland cell, germ line, hermaphrodite distal tip cell, hypodermis, I4 neuron, M cell, male distal tip cell, muscle cell, OLL, PLM, Posterior spermatheca, PVD, RIG, somatic gonad precursor	N.A.	1-day post-L4 adult hermaphrodite Ce, 10-days post-L4 adult hermaphrodite Ce, 11-15 days post-L4 adult hermaphrodite Ce, 14-days post-L4 adult hermaphrodite Ce, 15-days post-L4 adult hermaphrodite Ce, 16-18 days post-L4 adult hermaphrodite Ce, 2-days post-L4 adult hermaphrodite Ce, 20-days post-L4 adult hermaphrodite Ce, 3-days post-L4 adult hermaphrodite Ce, 3-fold embryo Ce, 6-days post-L4 adul…	N.A.	HGNC:10405|EnsEMBL-Compara;Hieranoid;Panther;OrthoFinder;SonicParanoid;Inparanoid;OMA;OrthoInspector	cytosolic small ribosomal subunit, ribonucleoprotein complex, ribosome, small ribosomal subunit, structural constituent of ribosome, translation	rps-20 encodes a small ribosomal subunit S20 protein.	Predicted to be a structural constituent of ribosome. Predicted to be involved in translation. Predicted to be located in ribosome. Predicted to be part of cytosolic small ribosomal subunit. Is an ortholog of human RPS20 (ribosomal protein S20).	Enriched in hypodermis, PVD, OLL, AFD, ASER, PLM, germ line, somatic gonad precursor, excretory cell, M cell, ADA, AVG, CAN, hermaphrodite distal tip cell, male distal tip cell, excretory gland cell, I4 neuron, RIG, anterior spermatheca, Posterior spermatheca and muscle cell according to tiling array, RNA-seq, single-cell RNA-seq and microarray. Affected by nhr-40, aak-2, atx-3, nhr-49, daf-12, Z…	WBPaper00035228|pmid19805813, WBPaper00038491|pmid21647448, WBPaper00055090|pmid30120140
chrIII	1617375	1618922	1548	2	175315	NM_065027	WBGene00021248	Y22D7AL.10	10 kDa heat shock protein, mitochondrial	WBGene00021248	Y22D7AL.10	Caenorhabditis elegans	protein_coding_gene	Y22D7AL.10	CELE_Y22D7AL.10	Y22D7AL.10.1	N.A.	CE27242	CE27242|HMMPANTHER:PTHR10772|HMMPANTHER:PTHR10772:SF0|PRINTS:PR00297|SCANPROSITE:PS00681|SMART:SM00883|PFAM:PF00166|SUPERFAMILY:SSF50129|INTERPRO:IPR011032|INTERPRO:IPR020818|INTERPRO:IPR037124	Q965Q1	Q965Q1	TF313814	NM_065027.9	NP_497428.1	III -20.168060	N.A.	embryonic lethal, extended life span, transgene expression increased	N.A.	N.A.	hsp-60|Physical;Regulatory, dcr-1|Physical, dlg-1|Physical, hsp-16.2|Regulatory, hsp-4|Regulatory, hsp-6|Regulatory, myrf-1|Physical, pan-1|Physical, pid-3|Physical, pqn-59|Physical, sec-6|Physical, smo-1|Physical, tost-1|Physical, zen-4|Physical	N.A.	ASER, body wall musculature, germ line, intestine, muscle cell, neuron	N.A.	1-cell embryo Ce, 1-day post-L4 adult hermaphrodite Ce, 10-days post-L4 adult hermaphrodite Ce, 11-15 days post-L4 adult hermaphrodite Ce, 2-days post-L4 adult hermaphrodite Ce, 20-days post-L4 adult hermaphrodite Ce, 3-days post-L4 adult hermaphrodite Ce, 3-fold embryo Ce, 4-days post-L4 adult hermaphrodite Ce, 6-days post-L4 adult hermaphrodite Ce, 7-10 days post-L4 adult hermaphrodite Ce, adul…	N.A.	HGNC:5269|EnsEMBL-Compara;Hieranoid;Panther;OrthoFinder;SonicParanoid;PhylomeDB;Inparanoid;OMA;OrthoInspector	ATP binding, ATP-dependent protein folding chaperone, chaperone binding, chaperone cofactor-dependent protein refolding, metal ion binding, mitochondrial matrix, protein folding, unfolded protein binding	N.A.	Predicted to enable chaperone binding activity\; metal ion binding activity\; and unfolded protein binding activity. Predicted to be involved in chaperone cofactor-dependent protein refolding. Predicted to be located in mitochondrial matrix. Is an ortholog of human HSPE1 (heat shock protein family E (Hsp10) member 1).	Enriched in ASER, germ line, neuron, muscle cell, intestine and body wall musculature according to RNA-seq, single-cell RNA-seq and microarray. Affected by dcr-1, wrn-1, crtc-1, aak-2, htz-1, lin-35, daf-16, jmjd-3.1, jmjd-1.2, hsf-1, lin-28, mir-34, glh-4, glh-1, pgl-1, pgl-3, emb-4, sma-2, sma-4, lin-22, smo-1, daf-2, nhl-2, hsp-6, sek-1, aak-1, smn-1, pid-3, tost-1, spc-1, unc-70, iff-1, set-2…	WBPaper00038491|pmid21647448, WBPaper00055090|pmid30120140
chrI	14758786	14759247	462	2	13183089	NM_001265502	WBGene00043308	tmem-107	Transmembrane protein 107	WBGene00043308	tmem-107	Caenorhabditis elegans	protein_coding_gene	F39B2.9	CELE_F39B2.9	F39B2.9.1	N.A.	CE16014	CE16014|HMMPANTHER:PTHR34341|PFAM:PF14995|INTERPRO:IPR029248	H2L2K0	H2L2K0	N.A.	NM_001265502.3	NP_001252431.1	I 26.737909	mv_F39B2.9, sjj_F39B2.9|I-7G24	N.A.	N.A.	oq100|Deletion|Frameshift, gk129939|Substitution|Missense, gk348350|Substitution|Missense, gk519406|Substitution|Missense, gk698507|Substitution|Missense, gk773856|Substitution|Missense	N.A.	ciliated neuron	ABalaappppa, ABalapaappa, ABalapapapa, ABalapappaa, ABalapppapa, ABalappppaa, ABalppapppa, ABalpppappp, ABalppppapa, ABarapppppa, ABarpapaapp, ABplaaaaapp, ABplaapappp, ABplapaaaap, ABplapppapp, ABplpaaappa, ABpraaaappp, ABpraaapapa, ABpraapappp, ABprapaaaap, ABprapppapp, ABprpaaappa, ADEL, ADER, ADFL, ADFR, AFDL, AFDR, ASEL, ASER, ASGL, ASGR, ASHL, ASHR, ASIL, ASIR, ASJL, ASJR, ASKL, ASKR, AUAL,…	N.A.	1-day post-L4 adult hermaphrodite Ce, 3-days post-L4 adult hermaphrodite Ce, 3-fold embryo Ce, adult hermaphrodite Ce, all stages Ce, blastula embryo Ce, embryo Ce, L1 larva Ce, L2 larva Ce, L3 larva Ce, L4 larva Ce, larva Ce	N.A.	N.A.	cell projection organization, ciliary transition zone, dendrite development, integral component of membrane, membrane, MKS complex, non-motile cilium assembly, protein localization to ciliary transition zone	N.A.	Involved in dendrite development\; non-motile cilium assembly\; and protein localization to ciliary transition zone. Located in ciliary transition zone. Expressed in ciliated neurons.	Enriched in NSM, ADER, ADEL, ADFR, ADFL, AWBR, AWBL, AFDR, AFDL, ASER, ASEL, ASGR, ASGL, AWAR, AWAL, ASHR, ASHL, ASIR, ASIL, ABpraapappp, ABplaapappp, ASJR, ASJL, ASKR, ASKL, ABpraaaappp, ABalpppappp, AUAR, AUAL, AWCR, AWCL, BAGR, BAGL, CEPVR, CEPVL, CEPDR, CEPDL, IL1VR, IL1VL, IL1R, IL1L, IL1DR, IL1DL, ABalapaappa, ABarapppppa, ABalppapppa, ABalappppaa, ABalapappaa, ABalaappppa, IL2VR, IL2VL, IL…	WBPaper00048909|pmid26595381, WBPaper00054643|pmid28401750, WBPaper00062114|pmid34739033, WBPaper00063946|pmid35417689
chrV	7776579	7777143	565	1	179154	NM_072606	WBGene00004499	rps-30	40S ribosomal protein S30	WBGene00004499	rps-30	Caenorhabditis elegans	protein_coding_gene	C26F1.4	CELE_C26F1.4	C26F1.4.1	CEOP5164	CE06878	CE06878|HMMPANTHER:PTHR12650:SF30|HMMPANTHER:PTHR12650|SMART:SM00213|PFAM:PF04758|PFAM:PF00240|SUPERFAMILY:SSF54236|INTERPRO:IPR000626|INTERPRO:IPR006846|INTERPRO:IPR029071	Q18231	Q18231	TF313779	NM_072606.7	NP_505007.1	V 0.89 +/- 0.00	cenix:128-d9, sjj_C26F1.4, mv_C26F1.4, sjj2_C26F1.4.1|V-16A11	larval arrest, maternal sterile, pleiotropic defects severe early emb, slow growth, transgene expression reduced	lethal, sterile	gk240038|Substitution|Missense, gk240041|Substitution|Missense, gk440328|Substitution|Missense, gk488852|Substitution|Missense, gk780550|Substitution|Missense, gk814991|Substitution|Missense	alg-1|Physical, cdc-42|Physical, cdc-48.2|Genetic, cey-4|Physical, ckb-2|Regulatory, dep-1|Physical, dlg-1|Physical, glh-1|Physical, hda-1|Physical, let-413|Physical, lgl-1|Physical, myrf-1|Physical, myrf-2|Physical, par-3|Physical, pid-2|Physical, pid-3|Physical, rpn-2|Physical, rps-3|Physical, sip-1|Physical, spc-1|Physical, tofu-6|Physical	N.A.	ADA, AFD, anterior spermatheca, ASER, excretory gland cell, germ line, hermaphrodite distal tip cell, I4 neuron, intestine, M cell, m2L, m2R, male distal tip cell, MI neuron, NSM, PLM, Posterior spermatheca, Psub1, RIG, somatic gonad precursor	N.A.	1-day post-L4 adult hermaphrodite Ce, 2-cell embryo Ce, 2-days post-L4 adult hermaphrodite Ce, 3-days post-L4 adult hermaphrodite Ce, 6-days post-L4 adult hermaphrodite Ce, adult Ce, adult hermaphrodite Ce, adult male Ce, all stages Ce, blastula embryo Ce, dauer larva Ce, embryo Ce, L1 larva Ce, L2 larva Ce, L2d larva Ce, L3 larva Ce, L4 larva Ce, oocyte-laying stage adult hermaphrodite Ce	N.A.	HGNC:3597|OrthoFinder;Hieranoid	cytosolic small ribosomal subunit, ribonucleoprotein complex, ribosome, structural constituent of ribosome, translation	rps-30 encodes two proteins, a small ribosomal subunit S30 protein and ubiquitin, which is cleaved from the ribosomal protein posttranslationally\; by homology, S30 is predicted to function in protein biosynthesis and ubiquitin in protein degradation\; in C. elegans, loss of rps-30 function via RNA-mediated interference (RNAi) does not result in any obvious abnormalities.	Predicted to be a structural constituent of ribosome. Predicted to be involved in translation. Predicted to be located in ribosome. Predicted to be part of cytosolic small ribosomal subunit. Is an ortholog of human FAU (FAU ubiquitin like and ribosomal protein S30 fusion).	Enriched in Psub1, AFD, ASER, PLM, germ line, somatic gonad precursor, M cell, ADA, hermaphrodite distal tip cell, male distal tip cell, excretory gland cell, I4 neuron, m2R, m2L, MI neuron, NSM, RIG, anterior spermatheca, Posterior spermatheca and intestine according to RNA-seq, single-cell RNA-seq and microarray. Affected by aak-2, let-7, gld-1, ash-2, wdr-5.1, cox-5B, jmjd-3.1, jmjd-1.2, dep-1…	WBPaper00038491|pmid21647448, WBPaper00055090|pmid30120140
chrII	9060731	9060812	82	1	24104934	NR_101730	WBGene00220090	T24B8.22	ncRNA	WBGene00220090	T24B8.22	Caenorhabditis elegans	ncRNA_gene	T24B8.22	cel-inc145, CELE_T24B8.22	T24B8.22	N.A.	N.A.	N.A.	N.A.	N.A.	N.A.	NR_101730.1	N.A.	II 0.996008	N.A.	N.A.	N.A.	N.A.	N.A.	N.A.	N.A.	N.A.	N.A.	N.A.	N.A.	N.A.	N.A.	Is affected by several genes including daf-2\; set-2\; and unc-70 based on microarray and RNA-seq studies.	Affected by daf-2, unc-70, olrn-1, set-2 and swsn-1 according to microarray and RNA-seq.	N.A.
chrI	10433044	10435231	2188	2	172920	NM_001026538	WBGene00003902	pab-1	Polyadenylate-binding protein	WBGene00003902	pab-1	Caenorhabditis elegans	protein_coding_gene	Y106G6H.2	CELE_Y106G6H.2	Y106G6H.2.1, Y106G6H.2.2, Y106G6H.2.3	N.A.	CE20412	CE20412|HMMPANTHER:PTHR24012:SF712|HMMPANTHER:PTHR24012|PFSCAN:PS50102|PFSCAN:PS51309|SMART:SM00517|SMART:SM00360|SMART:SM00361|TIGRFAM:TIGR01628|PFAM:PF00658|PFAM:PF00076|SUPERFAMILY:SSF54928|SUPERFAMILY:SSF63570|INTERPRO:IPR000504|INTERPRO:IPR002004|INTERPRO:IPR003954|INTERPRO:IPR006515|INTERPRO:IPR012677|INTERPRO:IPR035979|INTERPRO:IPR036053	Q9U302	Q9U302	N.A.	NM_001383718.2	NP_001369814.1	I 5.03 +/- 0.01	cenix:141-a12, sjj_Y106G6H.2|I-5O21, mv_Y106G6H.2	avoids bacterial lawn, body wall muscle sarcomere morphology variant, cell membrane organization biogenesis variant, cell proliferation increased, chromosome condensation variant, diplotene progression during oogenesis variant, distal tip cell morphology variant, early larval arrest, embryo osmotic integrity defective early emb, embryonic lethal, endosome biogenesis variant, excess intestinal cel…	germline proliferation variant, sterile	ar232|Substitution|Nonsense, bn116|Substitution|Nonsense, bn119|Substitution|Nonsense, gk120661|Substitution|Missense, gk120662|Substitution|Missense, gk120663|Substitution|Missense, gk321703|Substitution|Missense, gk478301|Substitution|Missense, gk498438|Substitution|Missense, gk659614|Substitution|Missense, gk661238|Substitution|Nonsense, gk703108|Substitution|Missense, gk724677|Substitution|Mi…	ain-1|Physical, ain-2|Physical, alg-1|Physical, atx-2|Physical, car-1|Physical, cdc-42|Physical, cfp-1|Physical, cgh-1|Physical, csr-1|Physical, dlg-1|Physical, dve-1|Physical, erh-2|Physical, gck-1|Physical, gld-1|Physical, glh-1|Physical, glp-1|Regulatory, kle-2|Physical, let-413|Physical, lgl-1|Physical, msp-152|Regulatory, myrf-1|Physical, myrf-2|Physical, nmad-1|Physical, nrde-2|Physical, nx…	intestine, neuron	ABarpaaa, ABplpappaa, AUA, AVL, body wall muscle cell, CAN, ccAL, ccAR, ccD, ccDL, ccDR, ccPL, ccPR, dopaminergic neuron, DVB, germ line, hypodermis, M cell, MI neuron, neuron, OLL, PHC, PVD, RIA, sensory neuron, somatic gonad precursor	N.A.	1-cell embryo Ce, 1-day post-L4 adult hermaphrodite Ce, 11-15 days post-L4 adult hermaphrodite Ce, 14-days post-L4 adult hermaphrodite Ce, 15-days post-L4 adult hermaphrodite Ce, 16-18 days post-L4 adult hermaphrodite Ce, 2-days post-L4 adult hermaphrodite Ce, 3-days post-L4 adult hermaphrodite Ce, 4-days post-L4 adult hermaphrodite Ce, 6-days post-L4 adult hermaphrodite Ce, 7-10 days post-L4 adu…	N.A.	HGNC:8556|Hieranoid;Panther;OrthoFinder;SonicParanoid;PhylomeDB;Inparanoid;OMA;OrthoInspector, HGNC:8557|Hieranoid;Panther;OrthoFinder;SonicParanoid;PhylomeDB;Inparanoid;OMA;OrthoInspector, HGNC:8554|Hieranoid;Panther;OrthoFinder;SonicParanoid;PhylomeDB;Inparanoid;OMA;OrthoInspector, HGNC:15797|Hieranoid;Panther;OrthoFinder;SonicParanoid;PhylomeDB;Inparanoid;OMA;OrthoInspector, HGNC:31955|OrthoFi…	cytoplasm, cytoplasmic stress granule, cytosol, establishment of mitotic spindle localization, germ cell development, germ cell proliferation, mRNA 3'-UTR binding, mRNA binding, mRNA metabolic process, nematode larval development, nucleic acid binding, nucleus, P granule, P-body, poly(A) binding, poly(U) RNA binding, polysome, positive regulation of germ cell proliferation, positive regulation of…	pab-1 encodes a polyadenylate-binding protein (i.e., poly(A)-binding protein, or PAB)\; pab-1 is essential for germline proliferation, regulation of adult lifespan, and normal body size\; PAB-1 forms a complex with ATX-2, the C. elegans ataxin 2 ortholog, which is also required for germline development\; PAB-1 has been successfully used as an epitope-tagged transgenic reagent for tissue-specific …	Enables mRNA binding activity and protein C-terminus binding activity. Involved in several processes, including gamete generation\; positive regulation of reproductive process\; and regulation of cell cycle. Located in P granule and P-body. Part of polysome. Expressed in intestine. Is an ortholog of several human genes including PABPC1 (poly(A) binding protein cytoplasmic 1)\; PABPC3 (poly(A) bin…	Enriched in PVD, OLL, body wall muscle cell, dopaminergic neuron, hypodermis, germ line, somatic gonad precursor, sensory neuron, ABarpaaa, ABplpappaa, M cell, AUA, AVL, CAN, ccPR, ccPL, ccAR, ccAL, ccD, ccDR, ccDL, DVB, MI neuron, PHC, RIA and neuron according to microarray, tiling array, proteomic study, RNA-seq and single-cell RNA-seq. Affected by K10D11.2, daf-2, daf-16, alg-3, alg-4, bar-1, …	WBPaper00005636|pmid12454651, WBPaper00006028|pmid12906791, WBPaper00010086|pmid N.A., WBPaper00010762|pmid N.A., WBPaper00012525|pmid N.A., WBPaper00024364|pmid15342467, WBPaper00024924|pmid15687263, WBPaper00024994|pmid15693946, WBPaper00026640|pmid15996007, WBPaper00026846|pmid16207815, WBPaper00027222|pmid18050445, WBPaper00027261|pmid18050413, WBPaper00027281|pmid18050488, WBPaper00028381|pm…
chrV	6099172	6100509	1338	2	178997	NM_072174	WBGene00000802	crt-1	Calreticulin	WBGene00000802	crt-1	Caenorhabditis elegans	protein_coding_gene	Y38A10A.5	CELE_Y38A10A.5	Y38A10A.5.1	N.A.	CE21562	CE21562|HMMPANTHER:PTHR11073|HMMPANTHER:PTHR11073:SF42|PIRSF:PIRSF002356|PRINTS:PR00626|SCANPROSITE:PS00805|SCANPROSITE:PS00804|SCANPROSITE:PS00803|PFAM:PF00262|SUPERFAMILY:SSF63887|SUPERFAMILY:SSF49899|INTERPRO:IPR001580|INTERPRO:IPR009033|INTERPRO:IPR009169|INTERPRO:IPR013320	P27798	P27798	TF338438	NM_072174.6	NP_504575.1	V -0.35 +/- 0.00	mv_CAA42159, sjj_Y38A10A.5|V-4H05, cenix:76-b8, cenix:52-g6	body wall muscle sarcomere morphology variant, germ cell morphology variant, growth variant, intestinal degeneration, larval lethal, lethal, locomotion variant, mitochondria alignment variant, muscle detached, neuron degeneration variant, no induction of antimicrobial peptide expression after infection, protein expression reduced, reduced brood size, transgene expression increased, transgene subc…	ER stress response variant, necrotic cell death decreased, organism oxidative stress response hypersensitive, organism oxidative stress response variant, reduced brood size, tunicamycin hypersensitive, unfolded protein response variant	bz29|Substitution|Nonsense, bz30|Substitution|Nonsense, bz31|Substitution|Missense, bz50|Substitution|Missense, gk236520|Substitution|Missense, gk236521|Substitution|Missense, gk236522|Substitution|Missense, gk236523|Substitution|Missense, gk236524|Substitution|Missense, gk236525|Substitution|Missense, gk480641|Substitution|Missense, gk501705|Substitution|Missense, gk522985|Substitution|Missense,…	ced-3|Physical;Genetic, ire-1|Genetic;Regulatory, mec-4|Genetic;Regulatory, alg-1|Physical, atf-6|Regulatory, dlg-1|Physical, dve-1|Physical, hsp-3|Regulatory, hsp-4|Regulatory, itr-1|Genetic, lin-53|Physical, mrt-2|Physical, myrf-1|Physical, myrf-2|Physical, pan-1|Physical, pdi-2|Regulatory, pdi-3|Regulatory, pgp-5|Regulatory, pid-2|Physical, pid-3|Physical, pik-1|Physical, prmt-1|Physical, ran-…	body wall musculature, coelomocyte, excretory cell, excretory gland cell, head neuron, hypodermis, intestinal cell, intestine, neuron, pharyngeal muscle cell, pharynx, sperm, uterus	AIZ, anterior spermatheca, body wall muscle cell, C, ccAL, ccAR, ccD, ccDL, ccDR, ccPL, ccPR, coelomocyte, excretory gland cell, g1AL, g1AR, g1P, hermaphrodite distal tip cell, IL2DL, IL2DR, IL2VL, IL2VR, male distal tip cell, marginal cell, MCL, MCR, Posterior spermatheca, SIA, VB1, VB10, VB11, VB2, VB3, VB4, VB5, VB6, VB7, VB8, VB9	adult Ce, embryo Ce, L1 larva Ce, L2 larva Ce, L3 larva Ce, L4 larva Ce	1-cell embryo Ce, 1-day post-L4 adult hermaphrodite Ce, 10-days post-L4 adult hermaphrodite Ce, 11-15 days post-L4 adult hermaphrodite Ce, 2-days post-L4 adult hermaphrodite Ce, 20-days post-L4 adult hermaphrodite Ce, 3-days post-L4 adult hermaphrodite Ce, 3-fold embryo Ce, 5-days post-L4 adult hermaphrodite Ce, 6-days post-L4 adult hermaphrodite Ce, 7-10 days post-L4 adult hermaphrodite Ce, adul…	neuroendocrine tumor|By Orthology, colon cancer|By Orthology, hepatocellular carcinoma|By Orthology, lung cancer|By Orthology, colon carcinoma|By Orthology, essential thrombocythemia|By Orthology, thrombocytosis|By Orthology, ovarian cancer|By Orthology, gallbladder cancer|By Orthology, pancreatic ductal adenocarcinoma|By Orthology, pancreatic ductal carcinoma|By Orthology, esophagus squamous cel…	HGNC:1455|EnsEMBL-Compara;Hieranoid;Panther;OrthoFinder;SonicParanoid;PhylomeDB;Inparanoid;OMA;OrthoInspector, HGNC:20407|OrthoFinder;EnsEMBL-Compara;PhylomeDB;Panther	calcium ion binding, carbohydrate binding, cytoplasm, defecation, endoplasmic reticulum lumen, endoplasmic reticulum membrane, endoplasmic reticulum unfolded protein response, endoplasmic reticulum, hemidesmosome assembly, IRE1-mediated unfolded protein response, metal ion binding, multicellular organismal reproductive process, negative regulation of oxidative stress-induced neuron death, program…	crt-1 encodes an ortholog of calreticulin (a calcium-binding molecularchaperone of the endoplasmic reticulum)\; crt-1 is dispensable forviability, but required for normal sperm development, male matingefficiency, some forms of necrotic cell death, and hermaphrodite fertilityat high temperatures (which may reflect a stress response)\; crt-1expression is induced by stress\; CRT-1 protein binds Ca(2…	Enables calcium ion binding activity. Involved in several processes, including IRE1-mediated unfolded protein response\; hemidesmosome assembly\; and negative regulation of oxidative stress-induced neuron death. Located in cytoplasm. Expressed in several structures, including coelomocyte\; excretory system\; intestine\; pharynx\; and sperm. Used to study Parkinson's disease. Human ortholog(s) of …	Enriched in C, body wall muscle cell, coelomocyte, g1AR, g1AL, g1P, marginal cell, AIZ, ccPR, ccPL, ccAR, ccAL, ccD, ccDR, ccDL, hermaphrodite distal tip cell, male distal tip cell, excretory gland cell, IL2VR, IL2VL, IL2DR, IL2DL, MCR, MCL, SIA, anterior spermatheca, Posterior spermatheca, VB1, VB2, VB11, VB10, VB9, VB8, VB7, VB6, VB5, VB4 and VB3 according to RNA-seq and single-cell RNA-seq. Af…	WBPaper00001627|pmid1627827, WBPaper00002006|pmid8041603, WBPaper00004858|pmid11553721, WBPaper00005513|pmid12410314, WBPaper00005753|pmid12610523, WBPaper00005787|pmid12663863, WBPaper00006076|pmid12971899, WBPaper00006465|pmid15028283, WBPaper00010059|pmid N.A., WBPaper00010302|pmid N.A., WBPaper00010464|pmid N.A., WBPaper00017693|pmid N.A., WBPaper00018261|pmid N.A., WBPaper00018906|pmid N.A.,…
chrIII	5705604	5706122	519	2	175796	NM_065830	WBGene00004435	rpl-23	60S ribosomal protein L23	WBGene00004435	rpl-23	Caenorhabditis elegans	protein_coding_gene	B0336.10	CELE_B0336.10	B0336.10.1, B0336.10.2	CEOP3328	CE00778	CE00778|HMMPANTHER:PTHR11761:SF22|HMMPANTHER:PTHR11761|SCANPROSITE:PS00049|SMART:SM01374|PFAM:PF00238|SUPERFAMILY:SSF50193|INTERPRO:IPR000218|INTERPRO:IPR036853	P48158	P48158	TF300913	NM_065830.8	NP_498231.1	III -1.45	cenix:310-c5, TH:329b6, sjj_B0336.10|III-3C05, mv_G_YK1745, cenix:329-b6, cenix:310-d10	avoids bacterial lawn, cytoplasmic processing body variant, diplotene region organization variant, embryonic lethal, extended life span, germ cell compartment expansion variant, germ cell compartment morphology variant, germ cell compartment multinucleate, germ cell compartment size variant, giant oocytes, gonad morphology variant, gonad vesiculated, larval arrest, maternal sterile, molt defect, …	N.A.	ve616|Deletion|Inframe_deletion	myrf-1|Physical;Regulatory, cacn-1|Physical, csr-1|Physical, dlg-1|Physical, gld-1|Physical, glh-1|Physical, hrde-1|Physical, hsp-6|Regulatory, lin-53|Physical, mlh-1|Physical, nmad-1|Physical, nrde-2|Physical, pan-1|Physical, pid-3|Physical, prg-1|Physical, rpn-10|Physical, sec-6|Physical, sip-1|Physical, smo-1|Physical, spc-1|Physical, tebp-1|Physical, tofu-6|Physical	body wall musculature, excretory cell, head neuron, intestine, nervous system, pharynx	anterior gonadal sheath cell, anterior spermatheca, body wall musculature, CAN, dorsal nerve cord, excretory gland cell, germ line, hermaphrodite distal tip cell, I4 neuron, lateral nerve cord, M cell, m2L, m2R, male distal tip cell, nerve ring, NSM, pharynx, posterior gonadal sheath cell, Posterior spermatheca, RIG, somatic gonad precursor, somatic neuron, tail neuron, ventral nerve cord, vulval…	adult Ce, larva Ce	1-day post-L4 adult hermaphrodite Ce, 10-days post-L4 adult hermaphrodite Ce, 11-15 days post-L4 adult hermaphrodite Ce, 2-days post-L4 adult hermaphrodite Ce, 20-days post-L4 adult hermaphrodite Ce, 3-days post-L4 adult hermaphrodite Ce, 6-days post-L4 adult hermaphrodite Ce, adult Ce, adult hermaphrodite Ce, all stages Ce, dauer larva Ce, embryo Ce, L1 larva Ce, L2 larva Ce, L2d larva Ce, L3 la…	N.A.	HGNC:10316|EnsEMBL-Compara;Hieranoid;Panther;OrthoFinder;SonicParanoid;Inparanoid;OMA;OrthoInspector	cytosolic large ribosomal subunit, large ribosomal subunit rRNA binding, ribonucleoprotein complex, ribosome, structural constituent of ribosome, translation	rpl-23 encodes a large ribosomal subunit L23 protein.	Predicted to enable large ribosomal subunit rRNA binding activity. Predicted to be a structural constituent of ribosome. Predicted to be involved in translation. Predicted to be located in ribosome. Predicted to be part of cytosolic large ribosomal subunit. Is an ortholog of human RPL23 (ribosomal protein L23).	Enriched in ventral nerve cord, body wall musculature, vulval muscle, nerve ring, dorsal nerve cord, somatic neuron, tail neuron, lateral nerve cord, pharynx, germ line, somatic gonad precursor, M cell, CAN, hermaphrodite distal tip cell, male distal tip cell, excretory gland cell, anterior gonadal sheath cell, posterior gonadal sheath cell, I4 neuron, m2R, m2L, NSM, RIG, anterior spermatheca and…	WBPaper00004403|pmid11099034, WBPaper00005654|pmid12529635, WBPaper00024704|pmid15654727, WBPaper00025088|pmid15837805, WBPaper00035149|pmid19703296, WBPaper00038491|pmid21647448, WBPaper00040293|pmid21989027, WBPaper00049828|pmid27405932, WBPaper00055090|pmid30120140
chrIII	7941154	7941534	381	1	259333	NM_171199	WBGene00016209	C29E4.12	Protein FMC1 homolog	WBGene00016209	C29E4.12	Caenorhabditis elegans	protein_coding_gene	C29E4.12	CELE_C29E4.12	C29E4.12.1	CEOP3466	CE30619	CE30619|HMMPANTHER:PTHR31716|INTERPRO:IPR037667	Q8MNU8	Q8MNU8	TF321497	NM_171199.6	NP_741234.1	III -0.479860	N.A.	chromosome segregation variant, embryonic lethal, sister chromatid segregation defective early emb, transgene expression increased, unfolded protein response variant	N.A.	gk578957|Substitution|Missense, gk853573|Substitution|Missense	actl-1|Physical, atp-2|Physical	N.A.	ABalpappaa, ABarapapaa, AFD, ASER, germ line, MSaapaapa, MSpapaapa, somatic gonad precursor	N.A.	1-day post-L4 adult hermaphrodite Ce, 3-days post-L4 adult hermaphrodite Ce, 3-fold embryo Ce, 6-days post-L4 adult hermaphrodite Ce, adult Ce, adult hermaphrodite Ce, adult male Ce, all stages Ce, dauer larva Ce, embryo Ce, L1 larva Ce, L2 larva Ce, L3 larva Ce, L4 larva Ce	N.A.	HGNC:26946|Panther;EnsEMBL-Compara;Hieranoid;OrthoFinder;SonicParanoid;PhylomeDB;Inparanoid;OMA;OrthoInspector, HGNC:44671|EnsEMBL-Compara;Hieranoid;Panther;OrthoFinder;SonicParanoid;PhylomeDB;Inparanoid;OMA;OrthoInspector	mitochondrion	N.A.	Predicted to be located in mitochondrion. Is an ortholog of human FMC1 (formation of mitochondrial complex V assembly factor 1 homolog) and FMC1-LUC7L2 (FMC1-LUC7L2 readthrough).	Enriched in AFD, ASER, germ line, somatic gonad precursor, MSaapaapa, MSpapaapa, ABarapapaa and ABalpappaa according to RNA-seq and single-cell RNA-seq. Affected by mab-5, aak-2, lin-15B, tdp-1, npr-1, cox-5B, jmjd-3.1, jmjd-1.2, hsf-1, glp-1, daf-2, set-26, hpl-2, pmt-2, pry-1, pfd-6, ints-5, iff-1, set-6, baz-2, set-2, cdk-4 and cyd-1 according to RNA-seq, microarray and proteomic study. Affect…	WBPaper00038491|pmid21647448, WBPaper00055090|pmid30120140
chrII	11967182	11967515	334	2	174835	NM_064149	WBGene00012221	W03C9.5	Uncharacterized protein	WBGene00012221	W03C9.5	Caenorhabditis elegans	protein_coding_gene	W03C9.5	CELE_W03C9.5	W03C9.5.1	CEOP2580	N.A.	N.A.	Q23145	Q23145	N.A.	NM_064149.6	NP_496550.1	II 4.761885	N.A.	accumulated germline cell corpses, accumulated somatic cell corpses, antibody staining increased, autophagy variant, cell acidification defective, cell development variant, cleavage furrow initiation defective early emb, dumpy, embryonic lethal, engulfment variant, fat content reduced, integrity of membranous organelles defective early emb, locomotion variant, lysosome-related organelle morpholog…	autophagy variant, embryonic morphology defective early emb, phagosome maturation defective	gk667568|Substitution|Missense	comt-3|Physical	N.A.	germ line, hypodermis, intestine, neuron, OLL, PVD, ventral nerve cord	N.A.	1-day post-L4 adult hermaphrodite Ce, 2-days post-L4 adult hermaphrodite Ce, 3-days post-L4 adult hermaphrodite Ce, 3-fold embryo Ce, 7-10 days post-L4 adult hermaphrodite Ce, adult Ce, adult hermaphrodite Ce, adult male Ce, all stages Ce, blastula embryo Ce, dauer larva Ce, embryo Ce, L1 larva Ce, L2 larva Ce, L2d larva Ce, L3 larva Ce, L4 larva Ce, larva Ce	N.A.	N.A.	N.A.	N.A.	Enriched in several structures, including germ line\; hypodermis\; intestine\; mechanosensory neurons\; and ventral nerve cord based on tiling array\; RNA-seq\; and microarray studies. Is affected by several genes including daf-2\; hsf-1\; and sir-2.1 based on microarray and RNA-seq studies. Is affected by nine chemicals including hydrogen sulfide\; rotenone\; and D-glucose based on microarray an…	Enriched in ventral nerve cord, hypodermis, PVD, OLL, germ line, intestine and neuron according to tiling array, RNA-seq and microarray. Affected by cgh-1, cyc-1, isp-1, gld-2, jmjd-3.1, hsf-1, mir-34, glh-4, glh-1, pgl-1, pgl-3, ins-11, hpl-2, nhl-2, ints-5, sin-3, cfp-1, set-6, baz-2, egl-43, rnp-6, atfs-1, endu-2, sir-2.1, eri-1, ain-2, rnp-8, daf-2, tdp-1 and nuo-6 according to microarray and…	N.A.
chrII	1402571	1403077	507	1	173517	NM_061564	WBGene00021785	Y51H7C.7	Uncharacterized protein	WBGene00021785	Y51H7C.7	Caenorhabditis elegans	protein_coding_gene	Y51H7C.7	Y51H7C.m, Y51H7C.m, CELE_Y51H7C.7	Y51H7C.7.1	CEOP2048	N.A.	N.A.	Q9N3J4	Q9N3J4	TF314651	NM_061564.4	NP_493965.1	II -15.457610	N.A.	N.A.	lethal, sterile	gk133680|Substitution|Missense, gk133681|Substitution|Missense, gk772844|Substitution|Missense	tag-343|Physical	N.A.	germ line, hypodermis, NSM	N.A.	1-day post-L4 adult hermaphrodite Ce, 2-days post-L4 adult hermaphrodite Ce, 3-days post-L4 adult hermaphrodite Ce, 4-days post-L4 adult hermaphrodite Ce, 6-days post-L4 adult hermaphrodite Ce, 7-10 days post-L4 adult hermaphrodite Ce, adult Ce, adult hermaphrodite Ce, adult male Ce, all stages Ce, blastula embryo Ce, dauer larva Ce, embryo Ce, L1 larva Ce, L2 larva Ce, L2d larva Ce, L3 larva Ce,…	N.A.	HGNC:29911|EnsEMBL-Compara;Hieranoid;Panther;OrthoFinder;PhylomeDB;Inparanoid;OrthoInspector	DNA binding, exosome (RNase complex), maturation of 5.8S rRNA, nucleolus, regulation of gene expression, RNA binding	N.A.	Predicted to enable DNA binding activity and RNA binding activity. Predicted to be involved in maturation of 5.8S rRNA and regulation of gene expression. Predicted to be located in nucleolus. Predicted to be part of exosome (RNase complex). Is an ortholog of human C1D (C1D nuclear receptor corepressor).	Enriched in hypodermis, NSM and germ line according to tiling array and RNA-seq. Affected by cyc-1, cid-1, tatn-1, gld-2, clk-1, jmjd-3.1, glp-1, glh-4, glh-1, pgl-1, pgl-3, emb-4, daf-2, nuo-6, sek-1, aak-1, aak-2, iff-1, srbc-48, set-2, unc-30, sir-2.1, dys-1, fbf-1, mir-243 and gei-8 according to microarray, RNA-seq and proteomic study. Affected by rotenone, Zidovudine, Rifampin, allantoin, Cr…	WBPaper00038491|pmid21647448, WBPaper00055090|pmid30120140
chrIV	13239679	13239880	202	2	178279	NM_001047495	WBGene00004424	rpl-12	60S ribosomal protein L12	WBGene00004424	rpl-12	Caenorhabditis elegans	protein_coding_gene	JC8.3	CELE_JC8.3	JC8.3b, JC8.3a.1, JC8.3c.1	CEOP4535	CE17986, CE39743	CE17986|PhosphoPep:JC8.3a|HMMPANTHER:PTHR11661:SF2|HMMPANTHER:PTHR11661|SCANPROSITE:PS00359|SMART:SM00649|PFAM:PF03946|PFAM:PF00298|SUPERFAMILY:SSF46906|SUPERFAMILY:SSF54747|INTERPRO:IPR000911|INTERPRO:IPR020783|INTERPRO:IPR020784|INTERPRO:IPR036769|INTERPRO:IPR036796, CE39743|HMMPANTHER:PTHR11661:SF2|HMMPANTHER:PTHR11661|SCANPROSITE:PS00359|PFAM:PF00298|SUPERFAMILY:SSF46906|INTERPRO:IPR000911|IN…	P61866	P61866	TF300123	NM_070141.10, NR_002385.1, NM_001047495.6	NP_001040960.1, NP_502542.1	IV 8.48	sjj_JC8.3|IV-7E03, mv_JC8.3, cenix:118-h5	apoptosis fails to occur, apoptosis reduced, cell secretion variant, diplotene absent during oogenesis, embryonic lethal, germ cell compartment expansion absent, germ cell compartment expansion variant, gonad small, gonad vesiculated, larval lethal, maternal sterile, no oocytes, nuclei small, oocyte number decreased, pachytene progression during oogenesis variant, pachytene region organization va…	lethal, sterile	gk395545|Substitution|Missense, gk496055|Substitution|Missense, gk684030|Substitution|Missense	csr-1|Physical, glh-1|Physical, hcp-3|Physical, hsp-16.2|Physical, icd-1|Physical, lin-10|Physical, myrf-1|Physical, myrf-2|Physical, nrde-2|Physical, pan-1|Physical, pid-3|Physical, pqn-59|Physical, prg-1|Physical, rpl-12|Regulatory, rpl-12|Regulatory, rpl-1|Regulatory, rpl-3|Regulatory, rpl-7A|Regulatory, sec-6|Physical, sip-1|Physical, smg-1|Regulatory, smg-2|Regulatory, smo-1|Physical, spc-1|…	amphid neuron, anal depressor muscle, anal sphincter muscle, body wall musculature, coelomocyte, excretory cell, excretory gland cell, head neuron, hypodermis, intestine, mu_int_L, mu_int_R, nerve ring, nervous system, neuron, Pharyngeal gland cell, pharyngeal-intestinal valve, pharynx, rectal epithelium, rectal gland cell, reproductive system, seam cell, tail neuron, uterus, ventral cord neuron,…	anterior spermatheca, AVG, body wall musculature, CAN, ccAL, ccAR, ccD, ccDL, ccDR, ccPL, ccPR, DVC, excretory cell, excretory gland cell, germ line, hermaphrodite distal tip cell, intestine, M cell, male distal tip cell, OLL, pharynx, PHB, Posterior spermatheca, PVD, RIG, somatic gonad precursor, Z1, Z4	adult Ce, larva Ce	1-day post-L4 adult hermaphrodite Ce, 10-days post-L4 adult hermaphrodite Ce, 11-15 days post-L4 adult hermaphrodite Ce, 16-18 days post-L4 adult hermaphrodite Ce, 2-days post-L4 adult hermaphrodite Ce, 20-days post-L4 adult hermaphrodite Ce, 3-days post-L4 adult hermaphrodite Ce, 3-fold embryo Ce, 6-days post-L4 adult hermaphrodite Ce, adult Ce, adult hermaphrodite Ce, adult male Ce, all stages …	systemic lupus erythematosus|By Orthology	HGNC:10302|EnsEMBL-Compara;Hieranoid;Panther;OrthoFinder;SonicParanoid;PhylomeDB;Inparanoid;OMA;OrthoInspector	cytosolic large ribosomal subunit, large ribosomal subunit rRNA binding, large ribosomal subunit, regulation of alternative mRNA splicing, via spliceosome, ribonucleoprotein complex, ribosome, RNA binding, structural constituent of ribosome, translation	rpl-12 encodes a large ribosomal subunit L12 protein required in mass RNAi assays for embryonic viability, fertility, normally rapid growth, and general health\; the rpl-12 transcription unit has a nonsense transcript that is up-regulated in vivo by smg[-] mutations, indicating that rpl-12 is a natural substrate for SMG-mediated nonsense suppresssion\; several other natural mRNA substrates of SMG…	Predicted to enable large ribosomal subunit rRNA binding activity. Predicted to be a structural constituent of ribosome. Involved in regulation of alternative mRNA splicing, via spliceosome. Predicted to be located in ribosome. Predicted to be part of cytosolic large ribosomal subunit. Expressed in intestine. Human ortholog(s) of this gene implicated in systemic lupus erythematosus. Is an ortholo…	Enriched in germ line, intestine, body wall musculature, pharynx, PVD, OLL, somatic gonad precursor, excretory cell, M cell, Z4, Z1, AVG, CAN, ccPR, ccPL, ccAR, ccAL, ccD, ccDR, ccDL, hermaphrodite distal tip cell, male distal tip cell, DVC, excretory gland cell, PHB, RIG, anterior spermatheca and Posterior spermatheca according to proteomic study, Chronogram analysis, tiling array, RNA-seq, sing…	WBPaper00004313|pmid10970881, WBPaper00018175|pmid N.A., WBPaper00024418|pmid15314158, WBPaper00028451|pmid16943775, WBPaper00030791|pmid17562857, WBPaper00033013|pmid19302704, WBPaper00033152|pmid19417104, WBPaper00035228|pmid19805813, WBPaper00038491|pmid21647448, WBPaper00042599|pmid N.A., WBPaper00049828|pmid27405932, WBPaper00055090|pmid30120140, WBPaper00060662|pmid33225240
chrIII	1079682	1080338	657	2	175272	NM_171861	WBGene00004277	rab-18	Ras-related protein Rab-18	WBGene00004277	rab-18	Caenorhabditis elegans	protein_coding_gene	Y92C3B.3	pra-1, CELE_Y92C3B.3	Y92C3B.3a.1, Y92C3B.3a.2, Y92C3B.3b.1, Y92C3B.3b.2	CEOP3052	CE34438, CE27340	CE34438|HMMPANTHER:PTHR47977|HMMPANTHER:PTHR47977:SF23|PFSCAN:PS51421|PFSCAN:PS51419|PRINTS:PR00449|SMART:SM00175|SMART:SM00173|SMART:SM00176|SMART:SM00174|TIGRFAM:TIGR00231|PFAM:PF00071|SUPERFAMILY:SSF52540|INTERPRO:IPR001806|INTERPRO:IPR005225|INTERPRO:IPR027417, CE27340|HMMPANTHER:PTHR47977|HMMPANTHER:PTHR47977:SF23|PFSCAN:PS51420|PFSCAN:PS51419|PFSCAN:PS51421|PRINTS:PR00449|SCANPROSITE:PS0067…	Q8MXS1	Q8MXS1	TF313448	NM_171861.6, NM_171081.7	NP_741092.1, NP_741093.2	III -24.43 +/- 0.16	sjj2_Y92C3B.3a|III-8I09, cenix:179-c5, mv_Y92C3B.a	embryonic lethal, germ cell development variant, larval arrest, larval lethal, masculinization of germline, oocyte morphology variant, oocytes disorganized, spindle orientation variant AB or P1 early emb, sterile, tumorous germline	fat content reduced, lethal, plate tap reflex variant, slow growth, sterile	gk165987|Substitution|Missense, gk314359|Substitution|Missense, gk347297|Substitution|Missense, gk384668|Substitution|Missense, gk421337|Substitution|Missense, gk813958|Substitution|Missense, gk927030|Substitution|Missense, h16913|Substitution|Missense	actl-1|Physical, csr-1|Physical, elks-1|Physical, tbc-2|Physical, zen-4|Physical	N.A.	ABalaaaala, ABalaapaaa, ABarppaapp, ABarpppapp, germ line	N.A.	1-cell embryo Ce, 1-day post-L4 adult hermaphrodite Ce, 10-days post-L4 adult hermaphrodite Ce, 2-days post-L4 adult hermaphrodite Ce, 20-days post-L4 adult hermaphrodite Ce, 3-days post-L4 adult hermaphrodite Ce, 3-fold embryo Ce, 4-cell embryo Ce, 6-days post-L4 adult hermaphrodite Ce, 7-10 days post-L4 adult hermaphrodite Ce, adult Ce, adult hermaphrodite Ce, adult male Ce, all stages Ce, daue…	Warburg micro syndrome 3|By Orthology	HGNC:14244|Hieranoid;Panther;OrthoFinder;SonicParanoid;PhylomeDB;Inparanoid;OMA;OrthoInspector	Golgi apparatus, GTP binding, GTPase activity, intracellular protein transport, lipid droplet organization, nucleotide binding, protein transport	rab-18 encodes a small GTPase homologous to the Rab GTPases that function in endocytosis, membrane fusion, and vesicular trafficking events\; the precise biological role and expression pattern of rab-18 are not yet known.	Predicted to enable GTPase activity. Predicted to be involved in intracellular protein transport and lipid droplet organization. Predicted to be located in Golgi apparatus. Human ortholog(s) of this gene implicated in Warburg micro syndrome 3. Is an ortholog of human RAB18 (RAB18, member RAS oncogene family).	Enriched in germ line, ABalaaaala, ABalaapaaa, ABarppaapp and ABarpppapp according to RNA-seq and single-cell RNA-seq. Affected by cyc-1, aak-2, K10D11.2, smg-2, gld-2, clk-1, cox-5B, jmjd-3.1, jmjd-1.2, lin-22, daf-2, nuo-6, dlc-1, pfd-6, sek-1, cfp-1, set-2, csr-1, mrps-5, egl-43, hlh-11, daf-16 and mir-35 according to microarray, RNA-seq and proteomic study. Affected by hydrogen sulfide, roten…	WBPaper00002652|pmid9001248, WBPaper00015788|pmid N.A., WBPaper00027296|pmid18050472, WBPaper00029101|pmid17289575, WBPaper00030935|pmid17762880, WBPaper00038487|pmid21642964, WBPaper00038491|pmid21647448, WBPaper00049828|pmid27405932, WBPaper00055090|pmid30120140, WBPaper00057238|pmid31444285, WBPaper00058991|pmid32550463, WBPaper00062463|pmid35112996, WBPaper00063982|pmid35445028
chrI	2876936	2878037	1102	1	171854	NM_058662	WBGene00022114	Y71F9AL.9	Uncharacterized protein	WBGene00022114	Y71F9AL.9	Caenorhabditis elegans	protein_coding_gene	Y71F9AL.9	CELE_Y71F9AL.9	Y71F9AL.9.1	CEOP1068	CE22858	CE22858|PhosphoPep:Y71F9AL.9|HMMPANTHER:PTHR15623:SF11|HMMPANTHER:PTHR15623|SUPERFAMILY:SSF46934|INTERPRO:IPR009060|INTERPRO:IPR009816	Q9N4I3	Q9N4I3	TF320553	NM_001381536.1	NP_001368006.1	I -5.308138	N.A.	N.A.	N.A.	gk106148|Substitution|Missense, gk106149|Substitution|Missense, gk378465|Substitution|Missense, gk863106|Substitution|Missense, gk958147|Substitution|Missense, h9331|Substitution|Missense	alg-1|Physical, cdc-42|Physical, dlg-1|Physical, hmg-3|Physical, hmg-4|Physical, let-413|Physical, lgl-1|Physical, met-2|Physical, mut-16|Physical, myrf-1|Physical, myrf-2|Physical, nrde-2|Physical, pan-1|Physical, par-3|Physical, pid-3|Physical, pqn-59|Physical, rde-10|Physical, sec-6|Physical, tofu-6|Physical, zen-4|Physical	body wall musculature, head neuron, hypodermis, mu_int_L, mu_int_R, nerve ring, nervous system, pharynx, seam cell, uterine muscle, ventral cord neuron, vulval muscle	anal depressor muscle, body wall musculature, germ line, hermaphrodite distal tip cell, intestine, male distal tip cell, pharynx, vulval muscle	adult Ce, larva Ce	1-cell embryo Ce, 1-day post-L4 adult hermaphrodite Ce, 11-15 days post-L4 adult hermaphrodite Ce, 2-days post-L4 adult hermaphrodite Ce, 3-days post-L4 adult hermaphrodite Ce, 3-fold embryo Ce, 6-days post-L4 adult hermaphrodite Ce, 7-10 days post-L4 adult hermaphrodite Ce, adult Ce, adult hermaphrodite Ce, adult male Ce, all stages Ce, dauer larva Ce, embryo Ce, L1 larva Ce, L2 larva Ce, L3 lar…	N.A.	HGNC:24574|OrthoFinder;EnsEMBL-Compara;Panther;OrthoInspector, HGNC:18650|OrthoFinder;Panther;OrthoInspector	cytoplasm	N.A.	Predicted to be located in cytoplasm. Is an ortholog of human SPATS2L (spermatogenesis associated serine rich 2 like).	Enriched in germ line, body wall musculature, vulval muscle, intestine, pharynx, anal depressor muscle, hermaphrodite distal tip cell and male distal tip cell according to proteomic study, Chronogram analysis and single-cell RNA-seq. Affected by cid-1, aak-2, atx-3, daf-12, cdc-48.2, npr-1, jmjd-3.1, jmjd-1.2, hsf-1, glh-4, glh-1, pgl-1, pgl-3, sma-2, sma-4, hmg-3, hmg-4, dlc-1, rpl-33, rpl-5, sm…	WBPaper00038491|pmid21647448, WBPaper00056909|pmid31214513
chrIII	11718988	11719440	453	2	176605	NM_067116	WBGene00001235	elb-1	ELongin B	WBGene00001235	elb-1	Caenorhabditis elegans	protein_coding_gene	Y41C4A.10	3L686, CELE_Y41C4A.10	Y41C4A.10.1	CEOP3728	CE20250	CE20250|HMMPANTHER:PTHR13248|HMMPANTHER:PTHR13248:SF4|SUPERFAMILY:SSF54236|INTERPRO:IPR029071|INTERPRO:IPR039049	G5ECR7	G5ECR7	TF325964	NM_067116.7	NP_499517.1	III 12.01 +/- 0.03	TH:341e6, sjj_Y41C4A.10|III-6E17, cenix:341-e6, cenix:329-f5, TH:329f5, mv_G_YK3313	anaphase bridging, centrosome pair and associated pronuclear rotation variant, chromosome condensation variant, chromosome segregation variant, cleavage furrow defective, cortical blebs present, dead eggs laid, egg laying variant, embryonic lethal, germline proliferation variant, larval arrest, late larval arrest, lethal, locomotion variant, male tail morphology variant, meiosis variant, multiple…	N.A.	gk509665|Substitution|Missense	lrr-1|Physical;Regulatory, agef-1|Physical, atn-1|Physical, cdc-48.2|Genetic, ckb-2|Regulatory, csr-1|Physical, daf-16|Physical, elc-1|Physical, elc-2|Physical, enri-2|Physical, glh-1|Physical, lmn-1|Physical, mut-16|Physical, pik-1|Physical, smo-1|Physical, spk-1|Physical	N.A.	germ line, intestine	N.A.	1-day post-L4 adult hermaphrodite Ce, 2-days post-L4 adult hermaphrodite Ce, 3-days post-L4 adult hermaphrodite Ce, 3-fold embryo Ce, 4-days post-L4 adult hermaphrodite Ce, 6-days post-L4 adult hermaphrodite Ce, adult Ce, adult hermaphrodite Ce, adult male Ce, all stages Ce, blastula embryo Ce, dauer larva Ce, embryo Ce, L1 larva Ce, L2 larva Ce, L2d larva Ce, L3 larva Ce, L4 larva Ce	N.A.	HGNC:11619|EnsEMBL-Compara;Hieranoid;Panther;OrthoFinder;PhylomeDB;Inparanoid;OMA;OrthoInspector	Cul2-RING ubiquitin ligase complex, elongin complex, protein binding, protein domain specific binding, transcription elongation from RNA polymerase II promoter, VCB complex	elb-1 encodes an Elongin B ortholog required for chromosome condensationand segregation during mitosis and meiotic division II, and also for cellproliferation (probably through degradation of CKI-1)\; elb-1(RNAi) animalstend to arrest at the second meiotic cell division, with escapers showingmany other defects in chromosomal dynamics and cell cycle control such asabnormal pronuclear rotation and …	Enables protein domain specific binding activity. Predicted to be involved in transcription elongation from RNA polymerase II promoter. Part of Cul2-RING ubiquitin ligase complex. Is an ortholog of human ELOB (elongin B).	Enriched in germ line and intestine according to RNA-seq and microarray. Affected by zfp-1, aak-2, let-7, gld-1, ZK1236.1, npr-1, jmjd-1.2, lin-28, glh-4, glh-1, pgl-1, pgl-3, emb-4, sma-2, sma-4, smo-1, iff-1, set-6, baz-2, mut-16, set-2, nath-10, sir-2.1, ain-1, fbf-1 and gei-8 according to microarray, RNA-seq and proteomic study. Affected by rotenone, Zidovudine, Psoralens, allantoin, Sirolimu…	WBPaper00024321|pmid15215209, WBPaper00024458|pmid15326288, WBPaper00026616|pmid15973501, WBPaper00027315|pmid18050424, WBPaper00030834|pmid17609115, WBPaper00037728|pmid20978077, WBPaper00038491|pmid21647448, WBPaper00041771|pmid23195953, WBPaper00048493|pmid26321128, WBPaper00055090|pmid30120140
chrX	14490006	14490148	143	2	13223862	NR_072536	WBGene00198748	M163.19	ncRNA	WBGene00198748	M163.19	Caenorhabditis elegans	ncRNA_gene	M163.19	CELE_M163.19	M163.19	N.A.	N.A.	N.A.	N.A.	N.A.	N.A.	NR_072536.1	N.A.	X 16.709249	N.A.	N.A.	N.A.	N.A.	N.A.	N.A.	N.A.	N.A.	N.A.	N.A.	N.A.	N.A.	N.A.	N.A.	N.A.	N.A.
chrI	2064305	2064559	255	1	171763	NM_058522	WBGene00021347	rpb-10	DNA-directed RNA polymerases I, II, and III subunit RPABC5	WBGene00021347	rpb-10	Caenorhabditis elegans	protein_coding_gene	Y37E3.3	CELE_Y37E3.3	Y37E3.3.1	CEOP1028	CE26662	CE26662|HMMPANTHER:PTHR23431:SF4|HMMPANTHER:PTHR23431|PIRSF:PIRSF005653|SCANPROSITE:PS01112|PFAM:PF01194|SUPERFAMILY:SSF46924|INTERPRO:IPR000268|INTERPRO:IPR023580|Metal_ion_binding_site	Q9GR61	Q9GR61	TF103046	NM_058522.5	NP_490923.1	I -12.22 +/- 0.03	cenix:235-b10, sjj2_Y37E3.3|I-9O13	embryonic lethal	N.A.	N.A.	hda-1|Physical, pik-1|Physical	N.A.	AFD, dopaminergic neuron, germ line, hypodermis, neuron, OLL, PVD, somatic gonad precursor	N.A.	1-day post-L4 adult hermaphrodite Ce, 2-days post-L4 adult hermaphrodite Ce, 3-days post-L4 adult hermaphrodite Ce, 3-fold embryo Ce, 7-10 days post-L4 adult hermaphrodite Ce, adult Ce, adult hermaphrodite Ce, adult male Ce, all stages Ce, blastula embryo Ce, dauer larva Ce, embryo Ce, L1 larva Ce, L2 larva Ce, L2d larva Ce, L3 larva Ce, L4 larva Ce, L4-adult lethargus Ce, larva Ce	N.A.	HGNC:9199|EnsEMBL-Compara;Hieranoid;Panther;OrthoFinder;SonicParanoid;PhylomeDB;Inparanoid;OMA;OrthoInspector	DNA binding, DNA-directed 5'-3' RNA polymerase activity, DNA-directed RNA polymerase complex, metal ion binding, nucleus, RNA polymerase I complex, RNA polymerase II, core complex, RNA polymerase III complex, transcription by RNA polymerase I, transcription by RNA polymerase II, transcription, DNA-templated, tRNA transcription by RNA polymerase III, zinc ion binding	Y37E3.3 encodes the C. elegans ortholog of the RNA polymerase II Rbp10 subunit\; loss of Y37E3.3 activity via large-scale RNAi results in early embryonic lethality.	Predicted to enable zinc ion binding activity. Predicted to contribute to DNA-directed 5'-3' RNA polymerase activity. Predicted to be involved in tRNA transcription by RNA polymerase III\; transcription by RNA polymerase I\; and transcription by RNA polymerase II. Predicted to be located in nucleus. Predicted to be part of RNA polymerase I complex\; RNA polymerase II, core complex\; and RNA polym…	Enriched in dopaminergic neuron, hypodermis, PVD, OLL, AFD, germ line, somatic gonad precursor and neuron according to tiling array, RNA-seq and microarray. Affected by aak-2, tatn-1, clk-1, cox-5B, jmjd-3.1, jmjd-1.2, glh-4, glh-1, pgl-1, pgl-3, emb-4, sma-2, sma-4, daf-2, isp-1, nuo-6, aak-1, unc-70, mex-3, srbc-48, hda-1, tdp-1 and daf-16 according to RNA-seq, microarray and proteomic study. A…	WBPaper00018667|pmid N.A., WBPaper00029038|pmid18050436, WBPaper00038491|pmid21647448, WBPaper00055090|pmid30120140
chrIV	6910158	6910307	150	1	13196376	NR_056013	WBGene00196846	T22D1.19	ncRNA	WBGene00196846	T22D1.19	Caenorhabditis elegans	ncRNA_gene	T22D1.19	CELE_T22D1.19	T22D1.19	N.A.	N.A.	N.A.	N.A.	N.A.	N.A.	NR_056013.1	N.A.	IV 3.249359	N.A.	N.A.	N.A.	N.A.	N.A.	N.A.	N.A.	N.A.	N.A.	N.A.	N.A.	N.A.	N.A.	N.A.	N.A.	N.A.
chrIV	7486545	7486916	372	1	186326	NM_068801	WBGene00001936	his-62	putative histone H2B 4	WBGene00001936	his-62	Caenorhabditis elegans	protein_coding_gene	F55G1.3	CELE_F55G1.3	F55G1.3.1	N.A.	CE05165	CE05165|HMMPANTHER:PTHR23428:SF125|HMMPANTHER:PTHR23428|PRINTS:PR00621|SCANPROSITE:PS00357|SMART:SM00427|PFAM:PF00125|SUPERFAMILY:SSF47113|INTERPRO:IPR000558|INTERPRO:IPR007125|INTERPRO:IPR009072	Q27876	Q27876	N.A.	NM_068801.3	NP_501202.1	IV 3.34 +/- 0.00	cenix:221-d6, sjj_F55G1.3|IV-3B10, mv_F55G1.3	embryonic lethal, larval arrest, protruding vulva, RAB-11 recycling endosome localization variant, RAB-11 recycling endosome morphology variant, sister chromatid segregation defective early emb, thin, transgene subcellular localization variant	N.A.	gk205583|Substitution|Missense, gk205584|Substitution|Missense, gk543837|Substitution|Missense	hmg-4|Physical	N.A.	AFD, ALA, AS1, AS10, AS11, AS2, AS3, AS4, AS5, AS6, AS7, AS8, AS9, AVDL, AVDR, AVHL, AVHR, AVL, DVC, excretory gland cell, germ line, intestine, MC neuron, MCL, MCR, NSM, PVPL, PVPR, somatic gonad precursor, VC1, VC2, VC3, VC4, VC5, VC6	N.A.	1-day post-L4 adult hermaphrodite Ce, 10-days post-L4 adult hermaphrodite Ce, 2-days post-L4 adult hermaphrodite Ce, 20-days post-L4 adult hermaphrodite Ce, 3-days post-L4 adult hermaphrodite Ce, 3-fold embryo Ce, 4-days post-L4 adult hermaphrodite Ce, 5-days post-L4 adult hermaphrodite Ce, 6-days post-L4 adult hermaphrodite Ce, 7-10 days post-L4 adult hermaphrodite Ce, adult Ce, adult hermaphrod…	N.A.	HGNC:4747|EnsEMBL-Compara;Hieranoid;Panther;SonicParanoid;Inparanoid;OMA;OrthoInspector, HGNC:4751|EnsEMBL-Compara;Hieranoid;Panther;SonicParanoid;Inparanoid;OMA;OrthoInspector, HGNC:4746|EnsEMBL-Compara;Hieranoid;Panther;SonicParanoid;Inparanoid;OMA;OrthoInspector, HGNC:4748|EnsEMBL-Compara;Hieranoid;Panther;SonicParanoid;Inparanoid;OMA;OrthoInspector, HGNC:4749|EnsEMBL-Compara;Hieranoid;Panther…	DNA binding, nucleosome, protein heterodimerization activity, structural constituent of chromatin	his-62 encodes an H2B histone.	Predicted to enable DNA binding activity and protein heterodimerization activity. Predicted to be a structural constituent of chromatin. Predicted to be part of nucleosome. Is an ortholog of several human genes including H2BC3 (H2B clustered histone 3)\; H2BC5 (H2B clustered histone 5)\; and H2BC8 (H2B clustered histone 8).	Enriched in NSM, AFD, germ line, somatic gonad precursor, ALA, AVDR, AVDL, AVHR, AVHL, AVL, DVC, excretory gland cell, MC neuron, MCR, MCL, PVPR, PVPL, AS11, AS10, AS9, AS8, AS7, AS6, AS5, AS4, AS3, AS2, AS1, VC5, VC4, VC6, VC3, VC2, VC1 and intestine according to RNA-seq, single-cell RNA-seq and microarray. Affected by lin-35, lin-39, clk-1, daf-2, ham-3, jmjd-1.2, kgb-1, daf-12, daf-16, sma-2, …	WBPaper00025088|pmid15837805, WBPaper00030768|pmid17570845, WBPaper00038491|pmid21647448, WBPaper00055090|pmid30120140, WBPaper00057312|pmid31440537
chrIII	10740981	10742425	1445	2	176501	NM_066966	WBGene00006536	tbb-1	Tubulin beta chain	WBGene00006536	tbb-1	Caenorhabditis elegans	protein_coding_gene	K01G5.7	TUBB7, CELE_K01G5.7	K01G5.7.1	CEOP3700	CE16197	CE16197|HMMPANTHER:PTHR11588|HMMPANTHER:PTHR11588:SF404|PRINTS:PR01163|PRINTS:PR01161|SCANPROSITE:PS00228|SCANPROSITE:PS00227|SMART:SM00864|SMART:SM00865|PFAM:PF00091|PFAM:PF03953|SUPERFAMILY:SSF52490|SUPERFAMILY:SSF55307|INTERPRO:IPR000217|INTERPRO:IPR002453|INTERPRO:IPR003008|INTERPRO:IPR008280|INTERPRO:IPR018316|INTERPRO:IPR023123|INTERPRO:IPR036525|INTERPRO:IPR037103	O17921	O17921	N.A.	NM_066966.9	NP_499367.1	III 5.08 +/- 0.01	cenix:340-d5, cenix:320-e11, mv_G_YK1720, TH:340d5, TH:320e11, sjj_K01G5.7|III-5B12	avoids bacterial lawn, decreased recruitment of actin upon wounding, distal tip cell migration variant, embryonic lethal, larval arrest, lethal, mitosis variant, mitotic spindle defective early emb, no induction of antimicrobial peptide expression after infection, pronuclear migration defective early emb, RAB-11 recycling endosome localization variant, reduced brood size, slow growth, spindle ori…	axon outgrowth variant, commisure growth variant	gk184740|Substitution|Missense, gk184743|Substitution|Missense, gk184744|Substitution|Missense, gk313536|Substitution|Missense, gk328247|Substitution|Missense, gk526354|Substitution|Missense, gk578993|Substitution|Nonsense, gk742162|Substitution|Missense, gk861056|Substitution|Missense, gk957149|Substitution|Nonsense	tbb-2|Genetic;Regulatory, akir-1|Physical, csr-1|Physical, dlg-1|Physical, dyn-1|Physical, erh-2|Physical, gck-1|Physical, glh-1|Physical, hmg-4|Physical, lin-53|Physical, lit-1|Physical, myrf-1|Physical, myrf-2|Physical, nrde-2|Physical, pid-3|Physical, prg-1|Physical, sec-6|Physical, sip-1|Physical, smo-1|Physical, spc-1|Physical, spe-39|Physical, tofu-6|Physical, vps-45|Physical, wago-1|Physic…	body wall musculature, CANL, CANR, coelomocyte, epithelial cell, excretory gland cell, head neuron, intestinal cell, intestine, muscle cell, nervous system, Pharyngeal gland cell, pharynx, rectal gland cell, tail neuron, touch receptor neuron, uv1, ventral nerve cord	ABplaapappp, ABplapaaap, ABplapappp, ABpraapappp, ABprapaaap, ABprapappp, DVB, germ line	N.A.	1-cell embryo Ce, 1-day post-L4 adult hermaphrodite Ce, 10-days post-L4 adult hermaphrodite Ce, 2-days post-L4 adult hermaphrodite Ce, 3-fold embryo Ce, 6-days post-L4 adult hermaphrodite Ce, 7-10 days post-L4 adult hermaphrodite Ce, adult Ce, adult hermaphrodite Ce, adult male Ce, all stages Ce, blastula embryo Ce, dauer larva Ce, embryo Ce, L1 larva Ce, L2 larva Ce, L2d larva Ce, L3 larva Ce, L…	hypomyelinating leukodystrophy 6|By Orthology, torsion dystonia 4|By Orthology, complex cortical dysplasia with other brain malformations 6|By Orthology, congenital symmetric circumferential skin creases 1|By Orthology	HGNC:20774|OMA;EnsEMBL-Compara;Panther, HGNC:20778|OMA;EnsEMBL-Compara;Panther	cytoplasm, cytoskeleton, GTP binding, GTPase activity, microtubule cytoskeleton organization, microtubule, microtubule-based process, mitotic cell cycle, nucleotide binding, spindle microtubule, structural constituent of cytoskeleton	This gene encodes a homolog of mammalian beta-tubulin (TUBB) that is expressed at high levels in the germline\; TBB-1 is redundant for embryonic viability, due to its paralog TBB-2.	Predicted to enable GTP binding activity. Predicted to be a structural constituent of cytoskeleton. Predicted to be involved in microtubule cytoskeleton organization and mitotic cell cycle. Located in spindle microtubule. Expressed in several structures, including excretory gland cell\; intestine\; nervous system\; pharynx\; and uv1. Human ortholog(s) of this gene implicated in brain disease (mul…	Enriched in germ line, ABpraapappp, ABplaapappp, ABprapaaap, ABplapaaap, ABprapappp, ABplapappp and DVB according to proteomic study, RNA-seq and single-cell RNA-seq. Affected by cnb-1, daf-12, K10D11.2, let-7, gld-1, alg-3, alg-4, tatn-1, lem-2, emr-1, prg-1, clk-1, daf-2, jmjd-3.1, jmjd-1.2, lmn-1, mir-34, glh-4, glh-1, pgl-1, pgl-3, morc-1, atm-1, emb-4, sma-2, sma-4, smo-1, isp-1, nuo-6, hmg-…	WBPaper00004588|pmid11252172, WBPaper00006237|pmid12937270, WBPaper00006305|pmid14565976, WBPaper00013420|pmid15083533, WBPaper00016963|pmid N.A., WBPaper00018071|pmid N.A., WBPaper00019293|pmid N.A., WBPaper00025044|pmid15781712, WBPaper00025088|pmid15837805, WBPaper00026640|pmid15996007, WBPaper00027253|pmid18023119, WBPaper00029395|pmid17507392, WBPaper00031548|pmid18299348, WBPaper00033090|pm…
chrIII	5940991	5943542	2552	1	175840	NM_171868	WBGene00006727	ubq-1	Ubiquitin-related	WBGene00006727	ubq-1	Caenorhabditis elegans	protein_coding_gene	F25B5.4	CELE_F25B5.4	F25B5.4.1, F25B5.4.2	N.A.	CE01921	CE01921|HMMPANTHER:PTHR10666:SF350|HMMPANTHER:PTHR10666|PFSCAN:PS50053|PRINTS:PR00348|SCANPROSITE:PS00299|SMART:SM00213|PFAM:PF00240|SUPERFAMILY:SSF54236|INTERPRO:IPR000626|INTERPRO:IPR019956|INTERPRO:IPR029071	P0CG71	P0CG71	N.A.	NM_171139.8	NP_741157.1	III -1.43 +/- 0.00	sjj_F25B5.4|III-3K09, TH:301e11, TH:301e11_1, smd_F25B5.4, cenix:301-e11, mv_F25B5.4, cenix:301-e11_1, WBPaper00038381:F25B5_1_1	accumulated germline cell corpses, apoptosis increased, cell membrane organization biogenesis variant, chromosome condensation variant, dead eggs laid, diakinesis progression during oogenesis variant, diplotene region organization variant, embryonic lethal, germ cell compartment anucleate, germ cell compartment expansion variant, germ cell compartment morphology variant, germ cell compartment mul…	N.A.	gk175684|Substitution|Missense, gk175685|Substitution|Missense, gk175688|Substitution|Missense, gk175689|Substitution|Missense, gk175690|Substitution|Missense, gk175691|Substitution|Missense, gk175692|Substitution|Missense, gk175693|Substitution|Missense, gk175695|Substitution|Missense, gk175696|Substitution|Missense, gk380670|Substitution|Missense, gk400670|Substitution|Missense, gk512241|Substi…	bar-1|Physical, cav-1|Physical, cdc-42|Physical, daf-16|Physical, dct-1|Physical, dkf-1|Physical, dlg-1|Physical, dmd-4|Physical, eel-1|Physical, elt-2|Regulatory, F13G3.10|Physical, F26F2.1|Regulatory, grl-1|Physical, hgrs-1|Physical, hsp-16.2|Physical, igdb-2|Physical, let-413|Physical, lgl-1|Physical, lin-53|Physical, myrf-2|Physical, pals-5|Regulatory, par-3|Physical, rde-10|Physical, rnt-1|R…	body wall musculature, hypodermis, neuron, pharyngeal muscle cell	ABalaappppa, ABalapaappa, ABalapappaa, ABalappppaa, ABalppapppa, ABarapppppa, AIZ, AVG, AVK, DB1, DD1, DD2, DD3, DD4, DD5, DD6, germ line, I5 neuron, M5 neuron, MI neuron, NSM, PDE, SIA, VB1, VB10, VB11, VB2, VB3, VB4, VB5, VB6, VB7, VB8, VB9, VD1, VD10, VD11, VD12, VD13, VD2, VD3, VD4, VD5, VD6, VD7, VD8, VD9	adult Ce, all stages Ce, embryo Ce, L1 larva Ce, L2 larva Ce, L3 larva Ce, L4 larva Ce	1-cell embryo Ce, 1-day post-L4 adult hermaphrodite Ce, 14-days post-L4 adult hermaphrodite Ce, 15-days post-L4 adult hermaphrodite Ce, 16-18 days post-L4 adult hermaphrodite Ce, 2-days post-L4 adult hermaphrodite Ce, 3-days post-L4 adult hermaphrodite Ce, 5-days post-L4 adult hermaphrodite Ce, 6-days post-L4 adult hermaphrodite Ce, 7-10 days post-L4 adult hermaphrodite Ce, adult Ce, adult hermap…	N.A.	HGNC:12468|EnsEMBL-Compara;Hieranoid;SonicParanoid;Inparanoid;OMA;OrthoInspector	cytoplasm, modification-dependent protein catabolic process, nucleus, programmed cell death involved in cell development, protein tag, protein ubiquitination, ubiquitin protein ligase binding, ubiquitin-dependent protein catabolic process	N.A.	Predicted to enable protein tag and ubiquitin protein ligase binding activity. Involved in programmed cell death involved in cell development and ubiquitin-dependent protein catabolic process. Predicted to be located in cytoplasm and nucleus. Expressed in body wall musculature. Is an ortholog of human UBC (ubiquitin C).	Enriched in NSM, germ line, AVK, ABalapaappa, ABarapppppa, ABalppapppa, ABalappppaa, ABalapappaa, ABalaappppa, AIZ, AVG, DB1, I5 neuron, M5 neuron, MI neuron, PDE, SIA, VB1, VB2, VB11, VB10, VB9, VB8, VB7, VB6, VB5, VB4, VB3, VD13, VD12, VD11, VD10, VD9, VD8, VD7, VD6, VD5, VD4, VD3, VD2, VD1, DD6, DD5, DD4, DD3, DD2 and DD1 according to RNA-seq and single-cell RNA-seq. Affected by cyc-1, isp-1, …	WBPaper00001530|pmid1739435, WBPaper00001535|pmid1315299, WBPaper00001801|pmid7690036, WBPaper00002284|pmid7556908, WBPaper00004363|pmid10993680, WBPaper00004403|pmid11099034, WBPaper00014098|pmid N.A., WBPaper00014103|pmid N.A., WBPaper00014342|pmid N.A., WBPaper00015440|pmid N.A., WBPaper00020985|pmid N.A., WBPaper00020992|pmid N.A., WBPaper00026602|pmid15916954, WBPaper00027315|pmid18050424, W…
chrIII	7180252	7180616	365	1	176007	NM_066172	WBGene00004450	rpl-36	60S ribosomal protein L36	WBGene00004450	rpl-36	Caenorhabditis elegans	protein_coding_gene	F37C12.4	CELE_F37C12.4	F37C12.4.1	CEOP3416	CE30781	CE30781|HMMPANTHER:PTHR10114|SCANPROSITE:PS01190|PFAM:PF01158|INTERPRO:IPR000509|INTERPRO:IPR038097	P49181	P49181	TF314463	NM_066172.10	NP_498573.2	III -0.78 +/- 0.00	cenix:311-a2, cenix:329-h10, WBPaper00038381:F37C12_1_1, cenix:341-a6, TH:341a6, sjj_F37C12.4|III-3F14, mv_G_YK3706, cenix:310-h8, TH:311a2	avoids bacterial lawn, diplotene region organization variant, embryonic lethal, germ cell compartment expansion variant, germline nuclear positioning variant, gonad vesiculated, larval arrest, maternal sterile, oocyte morphology variant, oocyte number decreased, organism heat response variant, pachytene region organization variant, paraquat hypersensitive, pleiotropic defects severe early emb, si…	N.A.	gk542390|Substitution|Missense, gk570377|Substitution|Missense, gk856889|Substitution|Missense	cacn-1|Physical, csr-1|Physical, dhc-1|Genetic, erh-2|Physical, glh-1|Physical, gst-4|Regulatory, hsp-16.2|Regulatory, hsp-4|Regulatory, hsp-60|Regulatory, hsp-6|Regulatory, isp-1|Genetic, kgb-1|Genetic, lgg-1|Physical, mafr-1|Physical, myrf-1|Physical, myrf-2|Physical, nmad-1|Physical, nrde-2|Physical, pan-1|Physical, pid-3|Physical, pid-5|Physical, prg-1|Physical, rnf-1|Physical, rpl-13|Physica…	N.A.	anterior gonadal sheath cell, anterior spermatheca, CAN, excretory gland cell, germ line, hermaphrodite distal tip cell, I4 neuron, intestine, M cell, m2L, m2R, male distal tip cell, MI neuron, NSM, PDB, posterior gonadal sheath cell, Posterior spermatheca, RIG, RIH, somatic gonad precursor, URX	N.A.	1-day post-L4 adult hermaphrodite Ce, 10-days post-L4 adult hermaphrodite Ce, 11-15 days post-L4 adult hermaphrodite Ce, 16-18 days post-L4 adult hermaphrodite Ce, 2-days post-L4 adult hermaphrodite Ce, 20-days post-L4 adult hermaphrodite Ce, 3-days post-L4 adult hermaphrodite Ce, 4-days post-L4 adult hermaphrodite Ce, 5-days post-L4 adult hermaphrodite Ce, 6-days post-L4 adult hermaphrodite Ce, …	N.A.	HGNC:13631|EnsEMBL-Compara;Hieranoid;Panther;OrthoFinder;SonicParanoid;PhylomeDB;Inparanoid;OMA;OrthoInspector	cytoplasm, cytoplasmic translation, cytosol, cytosolic large ribosomal subunit, protein binding, ribonucleoprotein complex, ribosome, structural constituent of ribosome, translation	rpl-36 encodes a large ribosomal subunit L36 protein\; by homology, RPL-36 is predicted to function in protein biosynthesis\; in C. elegans, RPL-36 activity is required for embryonic and germline development and normal postembryonic growth rates.	Predicted to be a structural constituent of ribosome. Predicted to be involved in cytoplasmic translation. Predicted to be located in cytosol and ribosome. Predicted to be part of cytosolic large ribosomal subunit. Is an ortholog of human RPL36 (ribosomal protein L36).	Affected by 20-hydroxyecdysone according to proteomic study. Enriched in germ line, somatic gonad precursor, M cell, CAN, hermaphrodite distal tip cell, male distal tip cell, excretory gland cell, anterior gonadal sheath cell, posterior gonadal sheath cell, I4 neuron, m2R, m2L, MI neuron, NSM, PDB, RIG, RIH, anterior spermatheca, Posterior spermatheca, URX and intestine according to RNA-seq, sing…	WBPaper00006028|pmid12906791, WBPaper00035228|pmid19805813, WBPaper00038491|pmid21647448, WBPaper00049828|pmid27405932, WBPaper00055090|pmid30120140
chrIII	3396590	3397449	860	1	175441	NM_065300	WBGene00010303	cri-3	Conserved regulator of innate immunity protein 3	WBGene00010303	cri-3	Caenorhabditis elegans	protein_coding_gene	F59A2.3	CELE_F59A2.3	F59A2.3.1, F59A2.3.2	CEOP3108	CE17940	CE17940|HMMPANTHER:PTHR10826:SF1|HMMPANTHER:PTHR10826|PFAM:PF02330|SUPERFAMILY:SSF54529|INTERPRO:IPR003428|INTERPRO:IPR036561	Q21018	Q21018	TF315160	NM_001393306.1	NP_001379055.1	III -7.04 +/- 0.01	cenix:320-d10, TH:320D10, sjj_F59A2.3|III-1B10, mv_F59A2.3	dauer constitutive, exploded through vulva, locomotion variant, organism development variant, slow growth, transgene expression reduced	N.A.	gk322917|Substitution|Missense, gk347076|Substitution|Missense, gk461843|Substitution|Missense, gk498526|Substitution|Missense, gk577131|Substitution|Missense, gk618328|Substitution|Missense, gk755401|Substitution|Missense, gk857988|Substitution|Missense, h8311|Substitution|Missense	daf-14|Genetic, dlg-1|Physical, dve-1|Physical, glh-1|Physical, let-756|Genetic, lin-37|Physical, lin-53|Physical, myrf-1|Physical, nrde-2|Physical, pid-2|Physical, pid-3|Physical, pid-5|Physical, pik-1|Physical, scrm-1|Physical, sec-6|Physical, smo-1|Physical, swsn-2.2|Physical	N.A.	body wall muscle cell, germ line, hermaphrodite-specific anatomical entity, intestine, OLL, PVD, somatic gonad precursor	N.A.	1-day post-L4 adult hermaphrodite Ce, 10-days post-L4 adult hermaphrodite Ce, 11-15 days post-L4 adult hermaphrodite Ce, 2-days post-L4 adult hermaphrodite Ce, 20-days post-L4 adult hermaphrodite Ce, 3-days post-L4 adult hermaphrodite Ce, 3-fold embryo Ce, 4-days post-L4 adult hermaphrodite Ce, 6-days post-L4 adult hermaphrodite Ce, 7-10 days post-L4 adult hermaphrodite Ce, adult Ce, adult hermap…	combined oxidative phosphorylation deficiency 33|By Orthology	HGNC:1243|EnsEMBL-Compara;Hieranoid;Panther;OrthoFinder;PhylomeDB;Inparanoid;OMA;OrthoInspector	mature ribosome assembly, mitochondrial matrix, mitochondrion, protein binding	N.A.	Predicted to be involved in mature ribosome assembly. Predicted to be located in mitochondrial matrix. Human ortholog(s) of this gene implicated in combined oxidative phosphorylation deficiency 33. Is an ortholog of human C1QBP (complement C1q binding protein).	Enriched in germ line, body wall muscle cell, PVD, OLL, somatic gonad precursor, hermaphrodite-specific anatomical entity and intestine according to proteomic study, tiling array, RNA-seq, single-cell RNA-seq and microarray. Affected by daf-2, rde-4, zfp-1, clk-1, cyc-1, lin-39, gld-4, wrn-1, lin-35, lmn-1, lin-28, cebp-1, glh-4, glh-1, pgl-1, pgl-3, emb-4, sma-2, sma-4, lin-22, smo-1, nuo-6, pmt…	WBPaper00038491|pmid21647448, WBPaper00049828|pmid27405932, WBPaper00055090|pmid30120140, WBPaper00061547|pmid34166401
chrI	3788042	3788862	821	1	171949	NM_001025846	WBGene00004425	rpl-13	60S ribosomal protein L13	WBGene00004425	rpl-13	Caenorhabditis elegans	protein_coding_gene	C32E8.2	CELE_C32E8.2	C32E8.2b, C32E8.2a.1	CEOP1782	CE08526	CE08526|PhosphoPep:C32E8.2a|HMMPANTHER:PTHR11722|HMMPANTHER:PTHR11722:SF0|SCANPROSITE:PS01104|PFAM:PF01294|INTERPRO:IPR001380	P91128	P91128	TF300073	NM_001025846.6, NR_136367.1	NP_001021017.1	I -2.59 +/- 0.01	mv_C32E8.2, cenix:73-e8, cenix:146-c4, sjj_C32E8.2|I-1H19	apoptosis reduced, cytoplasmic processing body variant, diplotene absent during oogenesis, embryonic lethal, foraging behavior variant, germ cell compartment expansion absent, germ cell compartment expansion variant, gonad small, larval arrest, maternal sterile, no oocytes, nuclei small, oocyte number decreased, pachytene progression during oogenesis variant, pachytene region organization variant…	N.A.	gk107939|Substitution|Missense, gk903431|Substitution|Missense, gk903432|Substitution|Missense	cdc-48.2|Genetic, cfp-1|Physical, ckb-2|Regulatory, csr-1|Physical, erh-2|Physical, glh-1|Physical, hcp-3|Physical, icd-1|Physical, lin-53|Physical, mafr-1|Physical, mars-1|Physical, myrf-1|Physical, myrf-2|Physical, nmad-1|Physical, nrde-2|Physical, pan-1|Physical, pid-3|Physical, pqn-59|Physical, prg-1|Physical, rpl-1|Physical, rpl-36|Physical, sec-6|Physical, sip-1|Physical, smk-1|Physical, sm…	N.A.	anterior gonadal sheath cell, anterior spermatheca, CAN, excretory gland cell, germ line, hermaphrodite distal tip cell, I4 neuron, intestine, M cell, m2L, m2R, male distal tip cell, MCL, MCR, PDB, posterior gonadal sheath cell, Posterior spermatheca, RIG, somatic gonad precursor	N.A.	1-cell embryo Ce, 1-day post-L4 adult hermaphrodite Ce, 10-days post-L4 adult hermaphrodite Ce, 11-15 days post-L4 adult hermaphrodite Ce, 14-days post-L4 adult hermaphrodite Ce, 15-days post-L4 adult hermaphrodite Ce, 16-18 days post-L4 adult hermaphrodite Ce, 2-days post-L4 adult hermaphrodite Ce, 20-days post-L4 adult hermaphrodite Ce, 3-days post-L4 adult hermaphrodite Ce, 6-days post-L4 adul…	N.A.	HGNC:10303|EnsEMBL-Compara;Hieranoid;Panther;OrthoFinder;SonicParanoid;Inparanoid;OMA;OrthoInspector	cytoplasm, cytosol, cytosolic large ribosomal subunit, ribonucleoprotein complex, ribosome, RNA binding, structural constituent of ribosome, translation	rpl-13 encodes a large ribosomal subunit L13 protein.	Predicted to enable RNA binding activity. Predicted to be a structural constituent of ribosome. Predicted to be involved in translation. Predicted to be located in cytosol. Predicted to be part of cytosolic large ribosomal subunit. Is an ortholog of human RPL13 (ribosomal protein L13).	Enriched in germ line, somatic gonad precursor, M cell, CAN, hermaphrodite distal tip cell, male distal tip cell, excretory gland cell, anterior gonadal sheath cell, posterior gonadal sheath cell, I4 neuron, m2R, m2L, MCR, MCL, PDB, RIG, anterior spermatheca, Posterior spermatheca and intestine according to proteomic study, RNA-seq, single-cell RNA-seq and microarray. Affected by lin-35, atx-3, d…	WBPaper00004402|pmid11099033, WBPaper00005423|pmid12176360, WBPaper00028451|pmid16943775, WBPaper00038491|pmid21647448, WBPaper00049828|pmid27405932, WBPaper00055090|pmid30120140
chrIV	13777949	13778748	800	1	178342	NM_070254	WBGene00004430	rpl-18	60S ribosomal protein L18	WBGene00004430	rpl-18	Caenorhabditis elegans	protein_coding_gene	Y45F10D.12	CELE_Y45F10D.12	Y45F10D.12.1	CEOP4560	CE16650	CE16650|HMMPANTHER:PTHR10934:SF2|HMMPANTHER:PTHR10934|PFAM:PF17135|SUPERFAMILY:SSF52080|INTERPRO:IPR000039|INTERPRO:IPR021131|INTERPRO:IPR036227	O45946	O45946	TF300202	NM_070254.8	NP_502655.1	IV 10.83 +/- 0.01	cenix:76-e9, sjj_Y45F10D.12|IV-7G08, mv_G_YK1611	apoptosis reduced, avoids bacterial lawn, cell membrane organization biogenesis variant, cytoplasmic processing body variant, diplotene region organization variant, early larval arrest, embryonic lethal, germ cell compartment expansion variant, larval arrest, maternal sterile, molt defect, mRNA surveillance defective, nonsense mRNA accumulation, nuclei enlarged, oocyte number decreased, pachytene…	N.A.	gk217084|Substitution|Missense, gk217085|Substitution|Missense, gk354943|Substitution|Missense, gk388452|Substitution|Missense, gk509776|Substitution|Missense, gk555234|Substitution|Missense, gk619143|Substitution|Missense, gk763298|Substitution|Missense, gk858714|Substitution|Missense	cfp-1|Physical, csr-1|Physical, dve-1|Physical, glh-1|Physical, hsp-6|Regulatory, icd-1|Physical, lec-1|Physical, lin-53|Physical, mars-1|Physical, myrf-1|Physical, myrf-2|Physical, nrde-2|Physical, pan-1|Physical, pid-3|Physical, pqn-59|Physical, prg-1|Physical, sec-6|Physical, sip-1|Physical, smo-1|Physical, spc-1|Physical, tofu-6|Physical, tost-1|Physical	N.A.	ADA, ADE, anterior gonadal sheath cell, anterior spermatheca, excretory gland cell, germ line, hermaphrodite distal tip cell, I4 neuron, M cell, M1 neuron, m2L, m2R, male distal tip cell, MCL, MCR, NSM, PLM, posterior gonadal sheath cell, Posterior spermatheca, RIG, RIH, sensory neuron, somatic gonad precursor, URB	N.A.	1-cell embryo Ce, 1-day post-L4 adult hermaphrodite Ce, 10-days post-L4 adult hermaphrodite Ce, 11-15 days post-L4 adult hermaphrodite Ce, 14-days post-L4 adult hermaphrodite Ce, 15-days post-L4 adult hermaphrodite Ce, 16-18 days post-L4 adult hermaphrodite Ce, 2-days post-L4 adult hermaphrodite Ce, 20-days post-L4 adult hermaphrodite Ce, 24-cell embryo Ce, 3-days post-L4 adult hermaphrodite Ce, …	Diamond-Blackfan anemia 18|By Orthology	HGNC:10310|EnsEMBL-Compara;Hieranoid;Panther;OrthoFinder;SonicParanoid;PhylomeDB;Inparanoid;OMA;OrthoInspector	cytoplasm, cytosolic large ribosomal subunit, ribonucleoprotein complex, ribosome, RNA binding, structural constituent of ribosome, translation	rpl-18 encodes a large ribosomal subunit L18 protein.	Predicted to enable RNA binding activity. Predicted to be a structural constituent of ribosome. Predicted to be involved in translation. Predicted to be located in cytoplasm and ribosome. Predicted to be part of cytosolic large ribosomal subunit. Human ortholog(s) of this gene implicated in Diamond-Blackfan anemia 18. Is an ortholog of human RPL18 (ribosomal protein L18).	Enriched in NSM, PLM, germ line, somatic gonad precursor, sensory neuron, M cell, ADA, ADE, hermaphrodite distal tip cell, male distal tip cell, excretory gland cell, anterior gonadal sheath cell, posterior gonadal sheath cell, I4 neuron, M1 neuron, m2R, m2L, MCR, MCL, RIG, RIH, anterior spermatheca, Posterior spermatheca and URB according to RNA-seq and single-cell RNA-seq. Affected by atx-3, le…	WBPaper00005356|pmid12124626, WBPaper00005559|pmid12385749, WBPaper00035228|pmid19805813, WBPaper00038491|pmid21647448, WBPaper00049828|pmid27405932, WBPaper00055090|pmid30120140, WBPaper00059048|pmid31910362
chrIII	6970139	6971680	1542	2	175975	NM_066119	WBGene00001168	eef-1A.1	Elongation factor 1-alpha	WBGene00001168	eef-1A.1	Caenorhabditis elegans	protein_coding_gene	F31E3.5	eln-1, glp-3, eft-3, CELE_F31E3.5	F31E3.5.1	N.A.	CE01270	CE01270|PhosphoPep:R03G5.1|HMMPANTHER:PTHR23115|HMMPANTHER:PTHR23115:SF236|PFSCAN:PS51722|PRINTS:PR00315|SCANPROSITE:PS00301|TIGRFAM:TIGR00483|PFAM:PF03143|PFAM:PF00009|PFAM:PF03144|SUPERFAMILY:SSF50447|SUPERFAMILY:SSF50465|SUPERFAMILY:SSF52540|INTERPRO:IPR000795|INTERPRO:IPR004160|INTERPRO:IPR004161|INTERPRO:IPR004539|INTERPRO:IPR009000|INTERPRO:IPR009001|INTERPRO:IPR027417	P53013	P53013	N.A.	NM_066119.9	NP_498520.1	III -0.87 +/- 0.00	cenix:340-g9, mv_F31E3.5, sjj_F31E3.5|III-3N15, WBPaper00038381:F31E3_1_1, TH:304E11, TH:340G9, cenix:304-e11	apoptosis fails to occur, apoptosis reduced, cell membrane organization biogenesis variant, chromosome condensation variant, diplotene absent during oogenesis, embryonic lethal, extended life span, fewer germ cells, foraging behavior variant, germ cell arrest, germ cell compartment expansion absent, germ cell compartment expansion variant, germ cell morphology variant, gonad morphology variant, g…	21U RNA expression variant, germline proliferation variant, no germ line, sterile	ar229|Substitution|Missense, gk177574|Substitution|Missense, gk177576|Substitution|Missense, gk177578|Substitution|Missense, gk177580|Substitution|Missense, gk177582|Substitution|Missense, gk309778|Substitution|Missense, gk346738|Substitution|Missense, gk365682|Substitution|Missense, gk372446|Substitution|Missense, gk408378|Substitution|Missense, gk631074|Substitution|Missense, gk794698|Substitut…	hmg-4|Physical;Regulatory, cdap-2|Physical, cdc-42|Physical, clh-1|Physical, cyp-34A9|Regulatory, dlg-1|Physical, dve-1|Physical, elf-1|Regulatory, elt-2|Regulatory, ets-9|Regulatory, fbf-1|Physical, gcs-1|Regulatory, gei-13|Regulatory, glh-1|Physical, gst-4|Regulatory, hbl-1|Regulatory, hel-1|Regulatory, hsp-16.2|Regulatory, hsp-60|Regulatory, hsp-70|Regulatory, icd-1|Physical, igdb-2|Physical, …	body wall musculature, hypodermis, intestine, muscle cell, neuron, pharynx	anterior gonadal sheath cell, anterior spermatheca, CAN, ccAL, ccAR, ccD, ccDL, ccDR, ccPL, ccPR, excretory cell, excretory gland cell, germ line, hermaphrodite distal tip cell, intestine, M cell, male distal tip cell, posterior gonadal sheath cell, Posterior spermatheca, somatic gonad precursor	adult Ce, embryo Ce, larva Ce	1-cell embryo Ce, 1-day post-L4 adult hermaphrodite Ce, 14-days post-L4 adult hermaphrodite Ce, 15-days post-L4 adult hermaphrodite Ce, 16-18 days post-L4 adult hermaphrodite Ce, 2-days post-L4 adult hermaphrodite Ce, 3-days post-L4 adult hermaphrodite Ce, 3-fold embryo Ce, 7-10 days post-L4 adult hermaphrodite Ce, adult Ce, adult hermaphrodite Ce, adult male Ce, all stages Ce, blastula embryo Ce…	ovarian cancer|By Orthology, autosomal dominant intellectual developmental disorder 38|By Orthology, developmental and epileptic encephalopathy 33|By Orthology	HGNC:3189|Hieranoid;Panther;OrthoFinder;SonicParanoid;PhylomeDB;Inparanoid;OMA;OrthoInspector, HGNC:3192|Hieranoid;Panther;OrthoFinder;SonicParanoid;PhylomeDB;Inparanoid;OMA;OrthoInspector, HGNC:3200|Hieranoid;Panther;OrthoFinder;SonicParanoid;PhylomeDB;Inparanoid;OMA;OrthoInspector	cytoplasm, GTP binding, GTPase activity, nucleotide binding, translation elongation factor activity, translation factor activity, RNA binding, translation, translational elongation	eef-1A.1 encodes a translation elongation factor 1-alpha homolog that is required for embryonic viability, fertility, and germline maintenance\; EEF-1A.1 is identical to EEF-1A.2	Enables GTPase activity. Predicted to be involved in translational elongation. Predicted to be located in cytoplasm. Expressed in hypodermis\; intestine\; muscle cell\; and neurons. Human ortholog(s) of this gene implicated in Alzheimer's disease\; autosomal dominant non-syndromic intellectual disability 38\; developmental and epileptic encephalopathy 33\; and ovarian cancer. Is an ortholog of hu…	Enriched in germ line, somatic gonad precursor, M cell, CAN, ccPR, ccPL, ccAR, ccAL, ccD, ccDR, ccDL, hermaphrodite distal tip cell, male distal tip cell, excretory cell, excretory gland cell, anterior gonadal sheath cell, posterior gonadal sheath cell, intestine, anterior spermatheca and Posterior spermatheca according to RNA-seq and single-cell RNA-seq. Affected by daf-2, sti-1, lec-6, daf-12, …	WBPaper00002044|pmid7607073, WBPaper00002649|pmid9017394, WBPaper00003990|pmid10822256, WBPaper00004313|pmid10970881, WBPaper00005046|pmid11782949, WBPaper00005423|pmid12176360, WBPaper00006401|pmid14729485, WBPaper00010589|pmid N.A., WBPaper00011969|pmid N.A., WBPaper00012606|pmid N.A., WBPaper00015440|pmid N.A., WBPaper00018646|pmid N.A., WBPaper00021859|pmid N.A., WBPaper00023043|pmid N.A., WB…
chrIV	14822839	14824330	1492	2	178407	NM_001268910	WBGene00013311	sec-61.A	Plug_translocon domain-containing protein	WBGene00013311	sec-61.A	Caenorhabditis elegans	protein_coding_gene	Y57G11C.15	sec-61, CELE_Y57G11C.15	Y57G11C.15a.1, Y57G11C.15b.1	N.A.	CE14954, CE46476	CE14954|HMMPANTHER:PTHR10906:SF10|HMMPANTHER:PTHR10906|PIRSF:PIRSF004557|SCANPROSITE:PS00756|SCANPROSITE:PS00755|TIGRFAM:TIGR00967|PFAM:PF00344|PFAM:PF10559|SUPERFAMILY:SSF103491|INTERPRO:IPR002208|INTERPRO:IPR019561|INTERPRO:IPR023201, CE46476|HMMPANTHER:PTHR10906|HMMPANTHER:PTHR10906:SF10|PIRSF:PIRSF004557|SCANPROSITE:PS00755|SCANPROSITE:PS00756|TIGRFAM:TIGR00967|PFAM:PF00344|PFAM:PF10559|SUPER…	G3MU88, O18239	O18239	TF300348	NM_001268910.3, NM_001268909.4	NP_001255838.1, NP_001255839.1	IV 12.53	sjj2_Y57G11C.15|IV-9C18, cenix:36-c9, sjj_Y57G11C.15, mv_Y57G11C.15	accumulated germline cell corpses, apoptosis variant, cell membrane organization biogenesis variant, chromosome condensation variant, diakinesis progression during oogenesis variant, diplotene region organization variant, embryonic lethal, germ cell compartment anucleate, germ cell compartment expansion variant, germ cell compartment morphology variant, germline nuclear positioning variant, mater…	lethal, sterile	gk218881|Substitution|Missense, gk218882|Substitution|Missense, gk218885|Substitution|Missense, gk218886|Substitution|Missense, gk218887|Substitution|Missense, gk218888|Substitution|Missense, gk414918|Substitution|Missense, gk646253|Substitution|Missense, gk778169|Substitution|Missense, gk883979|Substitution|Missense, gk955903|Substitution|Missense, gk956191|Substitution|Missense	dlg-1|Physical, elks-1|Physical, glh-1|Physical, igdb-2|Physical, myrf-1|Physical, nmad-1|Physical, nrde-2|Physical, ooc-5|Physical, pan-1|Physical, ptrn-1|Physical, vit-1|Physical, vit-2|Physical, zen-4|Physical	N.A.	ABplpppaaa, ABplpppapa, ABplppppaa, ABplppppap, ABprpppaaa, ABprpppapa, ABprppppaa, ABprppppap, anterior gonadal sheath cell, anterior spermatheca, AVK, body wall muscle cell, CAN, ccAL, ccAR, ccD, ccDL, ccDR, ccPL, ccPR, head mesodermal cell, hermaphrodite distal tip cell, intestine, K cell, K' cell, male distal tip cell, marginal cell, mc1DL, mc1DR, mc1V, mc2DL, mc2DR, mc2V, mc3, MSaaaaapa, MSp…	N.A.	1-cell embryo Ce, 1-day post-L4 adult hermaphrodite Ce, 10-days post-L4 adult hermaphrodite Ce, 11-15 days post-L4 adult hermaphrodite Ce, 2-days post-L4 adult hermaphrodite Ce, 20-days post-L4 adult hermaphrodite Ce, 3-days post-L4 adult hermaphrodite Ce, 6-days post-L4 adult hermaphrodite Ce, 7-10 days post-L4 adult hermaphrodite Ce, adult Ce, adult hermaphrodite Ce, adult male Ce, all stages C…	familial juvenile hyperuricemic nephropathy|By Orthology	HGNC:18276|EnsEMBL-Compara;Hieranoid;Panther;OrthoFinder;SonicParanoid;PhylomeDB;Inparanoid;OMA;OrthoInspector, HGNC:17702|EnsEMBL-Compara;Hieranoid;Panther;OrthoFinder;SonicParanoid;PhylomeDB;Inparanoid;OMA;OrthoInspector	integral component of membrane, membrane, post-translational protein targeting to membrane, translocation, protein transmembrane transporter activity, protein transport, ribosome binding, Sec61 translocon complex, signal sequence binding, SRP-dependent cotranslational protein targeting to membrane, translocation	N.A.	Predicted to enable protein transmembrane transporter activity\; ribosome binding activity\; and signal sequence binding activity. Predicted to be involved in SRP-dependent cotranslational protein targeting to membrane, translocation and post-translational protein targeting to membrane, translocation. Predicted to be located in membrane. Predicted to be integral component of membrane. Predicted t…	Enriched in PVD, OLL, intestine, AVK, body wall muscle cell, head mesodermal cell, MSpppaaa, K' cell, K cell, mc1V, mc1DR, mc1DL, mc2V, mc2DR, mc2DL, mc3, ABprpppapa, ABplpppapa, ABplppppap, ABprppppap, ABplpppaaa, ABprpppaaa, MSaaaaapa, ABplppppaa, ABprppppaa, marginal cell, pm5, pm4, pm3, pm6, pm7, tail precursor cell, CAN, ccPR, ccPL, ccAR, ccAL, ccD, ccDR, ccDL, hermaphrodite distal tip cell,…	WBPaper00031214|pmid18007599, WBPaper00032322|pmid18977290, WBPaper00033545|pmid N.A., WBPaper00038491|pmid21647448, WBPaper00055090|pmid30120140
chrIII	12687017	12687906	890	2	176688	NM_067248	WBGene00004700	rsp-3	putative splicing factor, arginine/serine-rich 3	WBGene00004700	rsp-3	Caenorhabditis elegans	protein_coding_gene	Y111B2A.18	CeSF2\/ASF, CeSF2, Y111B2G.i, Y111B2G.i, CELE_Y111B2A.18	Y111B2A.18.1, Y111B2A.18.2	N.A.	CE31089	CE31089|PhosphoPep:Y111B2A.18|HMMPANTHER:PTHR23147:SF44|HMMPANTHER:PTHR23147|PFSCAN:PS50102|SMART:SM00360|PFAM:PF00076|SUPERFAMILY:SSF54928|INTERPRO:IPR000504|INTERPRO:IPR012677|INTERPRO:IPR035979	Q9NEW6	Q9NEW6	TF106261	NM_001383015.1	NP_001370111.1	III 18.19 +/- 0.01	TH:337F9, cenix:337-f9, sjj_Y111B2D.h|III-6K04, cenix:76-d7, mv_Y111B2G.i, cenix:333-b2	cell proliferation increased, early larval lethal, embryonic lethal, embryonic lethal late emb, embryonic morphology variant, excess intestinal cells, larval arrest, lethal, locomotion variant, pattern of transgene expression variant, protruding vulva, receptor mediated endocytosis defective, sterile, two fold arrest, unfertilized oocytes laid	dendritic termini number reduced	gk188888|Substitution|Missense, gk188889|Substitution|Missense, gk188890|Substitution|Missense, gk188892|Substitution|Missense, gk484385|Substitution|Missense, gk526788|Substitution|Missense, gk597412|Substitution|Missense, gk630233|Substitution|Missense, gk639329|Substitution|Missense, gk656799|Substitution|Missense, gk859144|Substitution|Missense, gk879138|Substitution|Missense, gk930414|Substi…	cey-1|Physical, cfp-1|Physical, csr-1|Physical, dlg-1|Physical, malt-1|Physical, nrde-2|Physical, pik-1|Physical, smo-1|Physical, spk-1|Physical	body wall musculature, gonad, head neuron, nervous system, pharynx, PVDL, PVDR, tail neuron, ventral cord neuron	ABalppppppp, ABpraaapppp, arc ant V, germ line, NSM	adult Ce, adult hermaphrodite Ce, larva Ce	1-cell embryo Ce, 1-day post-L4 adult hermaphrodite Ce, 10-days post-L4 adult hermaphrodite Ce, 2-days post-L4 adult hermaphrodite Ce, 20-days post-L4 adult hermaphrodite Ce, 3-days post-L4 adult hermaphrodite Ce, 3-fold embryo Ce, 7-10 days post-L4 adult hermaphrodite Ce, adult Ce, adult hermaphrodite Ce, adult male Ce, all stages Ce, embryo Ce, L1 larva Ce, L2 larva Ce, L2d larva Ce, L3 larva C…	colon cancer|By Orthology, myositis|By Orthology, lung squamous cell carcinoma|By Orthology, lung non-small cell carcinoma|By Orthology, lung adenocarcinoma|By Orthology, clear cell renal cell carcinoma|By Orthology, chronic myeloid leukemia|By Orthology, myeloid leukemia|By Orthology, cervix uteri carcinoma in situ|By Orthology, stomach cancer|By Orthology, urinary bladder cancer|By Orthology	HGNC:10780|Hieranoid;Panther;OrthoFinder;SonicParanoid;PhylomeDB;Inparanoid;OMA;OrthoInspector, HGNC:10791|Hieranoid;Panther;OrthoFinder;SonicParanoid;PhylomeDB;Inparanoid;OrthoInspector	alternative mRNA splicing, via spliceosome, embryo development ending in birth or egg hatching, mRNA processing, mRNA splice site selection, mRNA splicing, via spliceosome, nuclear speck, nucleic acid binding, nucleus, protein binding, RNA binding, RNA splicing	rsp-3 encodes an ortholog of human SF2\/ASF and member of the SR protein family of nuclear phosphoproteins that are required for constitutive splicing and influence alternative splicing regulation\; rsp-3 affects the development of oocytes together with rsr-1, and is required for late embryonic viability\; SPK-1 binds directly to and phosphorylates the RS domain of RSP-3 in vitro\; the rsp-3 mRNA…	Predicted to enable RNA binding activity. Involved in embryo development. Predicted to be located in nuclear speck. Expressed in PVDL\; PVDR\; and gonad. Human ortholog(s) of this gene implicated in several diseases, including gastrointestinal system cancer (multiple)\; lung non-small cell carcinoma (multiple)\; and urinary system cancer (multiple). Is an ortholog of human SRSF1 (serine and argin…	Enriched in germ line, NSM, arc ant V, ABpraaapppp and ABalppppppp according to proteomic study, RNA-seq and single-cell RNA-seq. Affected by cid-1, aak-2, tatn-1, bar-1, gld-2, cox-5B, jmjd-3.1, jmjd-1.2, emb-4, sma-4, smo-1, daf-2, isp-1, nuo-6, pfd-6, nhl-2, unc-70, cfp-1, sftb-1, mrps-5, mut-16, srbc-48, rnp-6, set-2, hlh-11, unc-30, sir-2.1, mut-2, slr-2, fbf-1, cdk-4, cyd-1, cdk-2, cye-1 an…	WBPaper00003988|pmid10747030, WBPaper00004476|pmid11091073, WBPaper00005023|pmid11747818, WBPaper00005943|pmid12783458, WBPaper00011886|pmid N.A., WBPaper00018645|pmid N.A., WBPaper00027229|pmid18050427, WBPaper00028451|pmid16943775, WBPaper00029295|pmid17437990, WBPaper00032014|pmid18620082, WBPaper00032289|pmid18946043, WBPaper00038491|pmid21647448, WBPaper00041771|pmid23195953, WBPaper00046432…
chrIV	4389808	4389957	150	1	13192904	NR_053091	WBGene00196315	Y24D9A.11	ncRNA	WBGene00196315	Y24D9A.11	Caenorhabditis elegans	ncRNA_gene	Y24D9A.11	CELE_Y24D9A.11	Y24D9A.11	N.A.	N.A.	N.A.	N.A.	N.A.	N.A.	NR_053091.1	N.A.	IV 0.197676	N.A.	N.A.	N.A.	gk471803|Substitution|Missense	N.A.	N.A.	N.A.	N.A.	N.A.	N.A.	N.A.	N.A.	N.A.	Is affected by sod-2 and rrf-3 based on RNA-seq studies. Is affected by Tunicamycin based on microarray studies.	Affected by sod-2 and rrf-3 according to RNA-seq. Affected by Tunicamycin according to microarray.	N.A.
chrV	15186683	15187360	678	2	180027	NM_074348	WBGene00000883	cyn-7	Peptidyl-prolyl cis-trans isomerase 7	WBGene00000883	cyn-7	Caenorhabditis elegans	protein_coding_gene	Y75B12B.2	cyp-7, CELE_Y75B12B.2	Y75B12B.2.1	N.A.	CE20371	CE20371|PhosphoPep:Y75B12B.2|HMMPANTHER:PTHR11071|HMMPANTHER:PTHR11071:SF222|PFSCAN:PS50072|PIRSF:PIRSF001467|PRINTS:PR00153|SCANPROSITE:PS00170|PFAM:PF00160|SUPERFAMILY:SSF50891|INTERPRO:IPR002130|INTERPRO:IPR024936|INTERPRO:IPR029000	P52015	P52015	TF312801	NM_074348.11	NP_506749.1	V 7.51 +/- 0.01	cenix:191-e7, sjj_Y75B12B.2, mv_AAC47125	embryonic lethal, extended life span, protein aggregation variant, transgene subcellular localization variant	N.A.	gk949332|Deletion|Inframe_deletion, gk255305|Substitution|Missense, gk351616|Substitution|Missense, gk358382|Substitution|Missense, gk494251|Substitution|Missense, gk553958|Substitution|Missense, gk632958|Substitution|Missense, gk743080|Substitution|Missense, gk750047|Substitution|Nonsense	alg-1|Physical, csr-1|Physical, dlg-1|Physical, glh-1|Physical, icd-1|Physical, myrf-1|Physical, ned-8|Physical, pan-1|Physical, pid-2|Physical, pid-3|Physical, sec-6|Physical, smo-1|Physical, spc-1|Physical, spe-39|Physical, tofu-6|Physical, ulp-3|Physical, vps-45|Physical	N.A.	anterior spermatheca, body wall musculature, DA neuron, DB1, dorsal nerve cord, germ line, I4 neuron, I5 neuron, intestine, lateral nerve cord, M cell, m2L, m2R, MCL, MCR, nerve ring, neuron, NSM, pharynx, Posterior spermatheca, PVC, retrovesicular ganglion, SAB, somatic gonad precursor, somatic neuron, spermatheca, tail neuron, VA neuron, ventral nerve cord, vulval muscle	N.A.	1-day post-L4 adult hermaphrodite Ce, 10-days post-L4 adult hermaphrodite Ce, 11-15 days post-L4 adult hermaphrodite Ce, 14-days post-L4 adult hermaphrodite Ce, 15-days post-L4 adult hermaphrodite Ce, 16-18 days post-L4 adult hermaphrodite Ce, 2-days post-L4 adult hermaphrodite Ce, 20-days post-L4 adult hermaphrodite Ce, 3-days post-L4 adult hermaphrodite Ce, 3-fold embryo Ce, 4-days post-L4 adul…	human immunodeficiency virus infectious disease|By Orthology, aggressive periodontitis|By Orthology, cholangiocarcinoma|By Orthology, nasopharynx carcinoma|By Orthology, Bell's palsy|By Orthology	HGNC:9253|EnsEMBL-Compara;SonicParanoid;Inparanoid;OMA;OrthoInspector, HGNC:9259|Hieranoid;SonicParanoid;Inparanoid;OMA;OrthoInspector, HGNC:33996|OMA;EnsEMBL-Compara;SonicParanoid;Inparanoid, HGNC:33998|OMA;EnsEMBL-Compara;SonicParanoid;Inparanoid, HGNC:24369|OMA;EnsEMBL-Compara;SonicParanoid;Inparanoid, HGNC:33995|EnsEMBL-Compara;SonicParanoid;Inparanoid;OMA;OrthoInspector, HGNC:33999|OMA;EnsEM…	cyclosporin A binding, cytoplasm, intracellular membrane-bounded organelle, isomerase activity, peptidyl-prolyl cis-trans isomerase activity, protein folding, protein peptidyl-prolyl isomerization	cyn-7 encodes a cyclophilin A isoform\; while not tested for peptidyl-prolyl isomerase activity in vitro, it is very similar to CYN-3 and closely resembles the prototypical CypA, and is therefore likely to be a member of the cytosolic CsA-binding cyclophilin subfamily\; CYN-7 was required for embryonic viability in one set of mass RNAi assays.	Predicted to enable cyclosporin A binding activity and peptidyl-prolyl cis-trans isomerase activity. Predicted to be involved in protein folding and protein peptidyl-prolyl isomerization. Predicted to be located in cytoplasm and intracellular membrane-bounded organelle. Human ortholog(s) of this gene implicated in several diseases, including Bell's palsy\; aggressive periodontitis\; and gastroint…	Enriched in germ line, body wall musculature, vulval muscle, ventral nerve cord, nerve ring, dorsal nerve cord, somatic neuron, tail neuron, lateral nerve cord, pharynx, spermatheca, somatic gonad precursor, M cell, DB1, I4 neuron, m2R, m2L, MCR, MCL, NSM, PVC, anterior spermatheca, Posterior spermatheca, I5 neuron, DA neuron, SAB, retrovesicular ganglion, intestine, VA neuron and neuron accordin…	WBPaper00002472|pmid8694762, WBPaper00005232|pmid11847225, WBPaper00005559|pmid12385749, WBPaper00024704|pmid15654727, WBPaper00026884|pmid18629211, WBPaper00031376|pmid18174190, WBPaper00033244|pmid N.A., WBPaper00038491|pmid21647448, WBPaper00049828|pmid27405932, WBPaper00055090|pmid30120140
chrI	4645737	4646957	1221	2	172074	NM_059015	WBGene00004415	rpl-4	60S ribosomal protein L4	WBGene00004415	rpl-4	Caenorhabditis elegans	protein_coding_gene	B0041.4	CELE_B0041.4	B0041.4.1	CEOP1196	CE07669	CE07669|PhosphoPep:B0041.4|HMMPANTHER:PTHR19431|HMMPANTHER:PTHR19431:SF0|SCANPROSITE:PS00939|PFAM:PF14374|PFAM:PF00573|SUPERFAMILY:SSF52166|INTERPRO:IPR002136|INTERPRO:IPR023574|INTERPRO:IPR025755|INTERPRO:IPR045240	O02056	O02056	TF300593	NM_059015.8	NP_491416.1	I -1.03 +/- 0.00	mv_B0041.4, sjj2_B0041.4.1|I-9G14, cenix:73-e7, sjj_B0041.4|I-2E11	accumulated germline cell corpses, apoptosis increased, cell membrane organization biogenesis variant, chromosome condensation variant, development phenotype, diakinesis region organization variant, diplotene region organization variant, embryonic lethal, extended life span, germ cell compartment anucleate, germ cell compartment expansion variant, germ cell compartment morphology variant, gonad d…	N.A.	gk109656|Substitution|Missense, gk920583|Substitution|Missense, h10041|Substitution|Missense, h11166|Substitution|Missense	cacn-1|Physical, cey-4|Physical, cfp-1|Physical, comt-3|Physical, csr-1|Physical, daf-16|Physical, elks-1|Physical, erh-2|Physical, gck-1|Physical, gld-1|Physical, glh-1|Physical, icd-1|Physical, itsn-1|Physical, lec-1|Physical, mafr-1|Physical, mars-1|Physical, mxt-1|Physical, myrf-1|Physical, myrf-2|Physical, nrde-2|Physical, pab-1|Physical, pab-2|Physical, pan-1|Physical, pid-3|Physical, pqn-5…	N.A.	anterior spermatheca, CAN, excretory cell, excretory gland cell, germ line, hermaphrodite distal tip cell, I4 neuron, intestine, M cell, m2L, m2R, male distal tip cell, MCL, MCR, MI neuron, NSM, OLL, Posterior spermatheca, PVD, RIG, RIH, somatic gonad precursor, URB	N.A.	1-cell embryo Ce, 1-day post-L4 adult hermaphrodite Ce, 10-days post-L4 adult hermaphrodite Ce, 11-15 days post-L4 adult hermaphrodite Ce, 14-days post-L4 adult hermaphrodite Ce, 15-days post-L4 adult hermaphrodite Ce, 16-18 days post-L4 adult hermaphrodite Ce, 2-days post-L4 adult hermaphrodite Ce, 20-days post-L4 adult hermaphrodite Ce, 3-days post-L4 adult hermaphrodite Ce, 3-fold embryo Ce, 5…	N.A.	HGNC:10353|EnsEMBL-Compara;Hieranoid;Panther;OrthoFinder;SonicParanoid;PhylomeDB;Inparanoid;OMA;OrthoInspector	cytosolic large ribosomal subunit, determination of adult lifespan, ribonucleoprotein complex, ribosome, RNA binding, structural constituent of ribosome, translation	rpl-4 encodes a large ribosomal subunit L4 protein.	Predicted to enable RNA binding activity. Predicted to be a structural constituent of ribosome. Involved in determination of adult lifespan. Predicted to be located in ribosome. Predicted to be part of cytosolic large ribosomal subunit. Is an ortholog of human RPL4 (ribosomal protein L4).	Enriched in intestine, PVD, OLL, germ line, somatic gonad precursor, excretory cell, M cell, CAN, hermaphrodite distal tip cell, male distal tip cell, excretory gland cell, I4 neuron, m2R, m2L, MCR, MCL, MI neuron, NSM, RIG, RIH, anterior spermatheca, Posterior spermatheca and URB according to Chronogram analysis, tiling array, RNA-seq and single-cell RNA-seq. Affected by isp-1, atx-3, daf-12, da…	WBPaper00004402|pmid11099033, WBPaper00004540|pmid11137018, WBPaper00024370|pmid15351708, WBPaper00025088|pmid15837805, WBPaper00029008|pmid17266679, WBPaper00038491|pmid21647448, WBPaper00041022|pmid22546897, WBPaper00049828|pmid27405932, WBPaper00055090|pmid30120140, WBPaper00057312|pmid31440537, WBPaper00058597|pmid31511882, WBPaper00060235|pmid32883755, WBPaper00061750|pmid34321666, WBPaper00…
chrIII	6206825	6207930	1106	1	175879	NM_065948	WBGene00004472	rps-3	40S ribosomal protein S3	WBGene00004472	rps-3	Caenorhabditis elegans	protein_coding_gene	C23G10.3	CELE_C23G10.3	C23G10.3.1	CEOP3356	CE01810	CE01810|HMMPANTHER:PTHR11760:SF36|HMMPANTHER:PTHR11760|PFSCAN:PS50823|SCANPROSITE:PS00548|TIGRFAM:TIGR01008|PFAM:PF07650|PFAM:PF00189|SUPERFAMILY:SSF54814|SUPERFAMILY:SSF54821|INTERPRO:IPR001351|INTERPRO:IPR004044|INTERPRO:IPR005703|INTERPRO:IPR009019|INTERPRO:IPR015946|INTERPRO:IPR036419	P48152	P48152	TF300901	NM_065948.6	NP_498349.1	III -1.41 +/- 0.00	cenix:341-h3, WBPaper00038381:C23G10_1_1, mv_G_YK1666, cenix:301-g12, sjj_C23G10.3|III-3C02, TH:301g12, TH:341h3	apoptosis reduced, avoids bacterial lawn, dauer constitutive, diplotene absent during oogenesis, diplotene region organization variant, early larval arrest, embryonic lethal, extended life span, fat content reduced, germ cell compartment expansion variant, larval arrest, larval lethal, life span phenotype, maternal sterile, molt defect, nuclei small, oocyte morphology variant, oocytes small, pach…	N.A.	gk176169|Substitution|Missense, gk176171|Substitution|Missense, gk459002|Substitution|Missense, gk580636|Substitution|Missense, gk743489|Substitution|Missense, gk834388|Substitution|Missense, gk849389|Substitution|Missense, gk878591|Substitution|Missense, snx2558|Substitution|Missense, snx4390|Substitution|Missense, snx698|Substitution|Missense	abu-15|Physical, csr-1|Physical, erh-2|Physical, glh-1|Physical, icd-1|Physical, magi-1|Physical, mars-1|Physical, myrf-1|Physical, myrf-2|Physical, nrde-2|Physical, pan-1|Physical, pid-3|Physical, pqn-59|Physical, pqn-71|Physical, prg-1|Physical, rps-10|Physical, rps-30|Physical, sip-1|Physical, smk-1|Physical, smo-1|Physical, spc-1|Physical, T23D8.3|Physical, tofu-6|Physical, tost-1|Physical, w…	N.A.	anterior spermatheca, CAN, excretory gland cell, germ line, hermaphrodite distal tip cell, I4 neuron, intestine, M cell, m2L, m2R, male distal tip cell, MCL, MCR, MI neuron, NSM, OLL, Posterior spermatheca, PVD, RIG, somatic gonad precursor	N.A.	1-day post-L4 adult hermaphrodite Ce, 10-days post-L4 adult hermaphrodite Ce, 11-15 days post-L4 adult hermaphrodite Ce, 14-days post-L4 adult hermaphrodite Ce, 15-days post-L4 adult hermaphrodite Ce, 16-18 days post-L4 adult hermaphrodite Ce, 2-days post-L4 adult hermaphrodite Ce, 20-days post-L4 adult hermaphrodite Ce, 3-days post-L4 adult hermaphrodite Ce, 5-days post-L4 adult hermaphrodite Ce…	N.A.	HGNC:10420|EnsEMBL-Compara;Hieranoid;Panther;OrthoFinder;SonicParanoid;PhylomeDB;Inparanoid;OMA;OrthoInspector	cytoplasm, cytosolic small ribosomal subunit, nucleus, positive regulation of apoptotic signaling pathway, ribonucleoprotein complex, ribosome, RNA binding, small ribosomal subunit, structural constituent of ribosome, translation	rps-3 encodes a small ribosomal subunit S3 protein that contains a KH RNA-binding domain and by homology,is predicted to function in protein biosynthesis\; in C. elegans, RPS-3 activity is required for embryonic and germline development, as well as the overall health of the animal.	Predicted to be a structural constituent of ribosome. Predicted to be involved in positive regulation of apoptotic signaling pathway. Predicted to be located in nucleus. Predicted to be part of cytosolic small ribosomal subunit. Is an ortholog of human RPS3 (ribosomal protein S3).	Enriched in PVD, OLL, germ line, somatic gonad precursor, M cell, CAN, hermaphrodite distal tip cell, male distal tip cell, excretory gland cell, I4 neuron, m2R, m2L, MCR, MCL, MI neuron, NSM, RIG, anterior spermatheca, Posterior spermatheca and intestine according to tiling array, RNA-seq, single-cell RNA-seq and microarray. Affected by daf-2, bir-1, cox-5B, jmjd-3.1, jmjd-1.2, dep-1, emb-4, erh…	WBPaper00029254|pmid17411345, WBPaper00035228|pmid19805813, WBPaper00038491|pmid21647448, WBPaper00049828|pmid27405932, WBPaper00055090|pmid30120140
chrII	8028060	8028245	186	2	13185981	NR_051413	WBGene00201642	C08B11.13	ncRNA	WBGene00201642	C08B11.13	Caenorhabditis elegans	ncRNA_gene	C08B11.13	CELE_C08B11.13	C08B11.13	N.A.	N.A.	N.A.	N.A.	N.A.	N.A.	NR_051413.1	N.A.	II 0.647328	N.A.	N.A.	N.A.	N.A.	N.A.	N.A.	AVK	N.A.	1-day post-L4 adult hermaphrodite Ce, L1 larva Ce	N.A.	N.A.	N.A.	N.A.	Enriched in AVK based on RNA-seq studies. Is affected by cep-1 based on RNA-seq studies.	Enriched in AVK according to RNA-seq. Affected by cep-1 according to RNA-seq.	N.A.
chrI	14790332	14790797	466	1	173347	NM_061177	WBGene00006730	uev-1	Ubiquitin-conjugating enzyme E2	WBGene00006730	uev-1	Caenorhabditis elegans	protein_coding_gene	F39B2.2	mms-2, CELE_F39B2.2	F39B2.2.1	CEOP1764	CE16008	CE16008|HMMPANTHER:PTHR24068|HMMPANTHER:PTHR24068:SF323|PFSCAN:PS50127|SMART:SM00212|PFAM:PF00179|SUPERFAMILY:SSF54495|INTERPRO:IPR000608|INTERPRO:IPR016135	O45495	O45495	TF316971	NM_061177.6	NP_493578.1	I 26.88 +/- 0.14	mv_F39B2.2, cenix:85-f3, sjj_F39B2.2|I-7G10	N.A.	N.A.	gk351824|Substitution|Missense, od10|Substitution|Nonsense	actl-1|Physical, B0432.8|Physical, eef-2|Physical, glr-1|Regulatory, K12D12.5|Physical, lin-35|Physical, met-2|Physical, ndk-1|Physical, nhr-91|Physical, rml-1|Physical, sip-1|Physical, ubc-13|Physical, ubc-1|Physical, vps-34|Physical	anus, distal tip cell, germ line, intestine, motor neuron, muscle cell, neuron, pharynx, tail, ventral cord neuron, ventral nerve cord, vulva	ABarppaapp, ABarpppapp, ABplapaaapa, ABplppaaaap, ABplpppaapa, ABprapaaapa, ABprppaaaap, ABprpppaapa, ALML, ALMR, AVAL, AVAR, AVEL, AVER, BDUL, BDUR, DA1, DA2, DA3, DA4, DA5, DA6, DA7, DA8, DA9, DB1, DB2, DB3, DB4, DB5, DB6, DB7, DD1, DD2, DD3, DD4, DD5, DD6, germ line, GLRDL, GLRDR, GLRL, GLRR, GLRVL, GLRVR, head mesodermal cell, intestine, MSpaaaaa, MSpaapaa, MSpppaaa, PLM, PVR, RIVL, RIVR, RMD…	adult Ce, embryo Ce, L1 larva Ce, L2 larva Ce, L3 larva Ce, L4 larva Ce	1-day post-L4 adult hermaphrodite Ce, 11-15 days post-L4 adult hermaphrodite Ce, 2-days post-L4 adult hermaphrodite Ce, 3-fold embryo Ce, 6-days post-L4 adult hermaphrodite Ce, 7-10 days post-L4 adult hermaphrodite Ce, adult Ce, adult hermaphrodite Ce, adult male Ce, all stages Ce, blastula embryo Ce, embryo Ce, L1 larva Ce, L2 larva Ce, L2d larva Ce, L3 larva Ce, L4 larva Ce	N.A.	HGNC:12494|Hieranoid;Panther;OrthoFinder;SonicParanoid;PhylomeDB;Inparanoid;OMA;OrthoInspector, HGNC:12495|EnsEMBL-Compara;Hieranoid;Panther;OrthoFinder;SonicParanoid;PhylomeDB;Inparanoid;OMA;OrthoInspector, HGNC:33521|Hieranoid;Panther;OrthoFinder;SonicParanoid;PhylomeDB;Inparanoid;OMA;OrthoInspector	cell projection, cytoplasm, cytosol, dendrite, neuron projection, nucleus, perikaryon, postreplication repair, protein K63-linked ubiquitination, protein polyubiquitination, regulation of locomotion involved in locomotory behavior, regulation of protein localization to cell surface, ubiquitin conjugating enzyme binding	uev-1 encodes a ubiquitin-conjugating enzyme (UBC or E2) variant that contains the characteristic UBC motif, but lacks the critical active-site cysteine residue necessary for catalytic activity\; UEV-1 activity is required cell autonomously for normal trafficking of the GLR-1 glutamate receptor and consequently, for normal locomotory behavior\; UEV-1 physically interacts with the UBC-13 ubiquitin…	Enables ubiquitin conjugating enzyme binding activity. Involved in regulation of locomotion involved in locomotory behavior and regulation of protein localization to cell surface. Located in cytosol\; neuron projection\; and nucleus. Expressed in several structures, including anus\; distal tip cell\; germ line\; neurons\; and ventral nerve cord. Is an ortholog of human UBE2V2 (ubiquitin conjugati…	Enriched in PLM, germ line, BDUR, BDUL, ALMR, ALML, AVAR, AVAL, AVER, AVEL, DA9, DA8, DA7, DA6, DA5, DA4, DA3, DA2, DA1, DB7, DB6, DB5, DB4, DB3, DB2, DB1, DD6, DD5, DD4, DD3, DD2, DD1, GLRVR, GLRVL, GLRR, GLRL, GLRDR, GLRDL, head mesodermal cell, MSpppaaa, MSpaapaa, MSpaaaaa, ABplapaaapa, ABprapaaapa, ABarppaapp, ABarpppapp, ABplpppaapa, ABprpppaapa, PVR, ABprppaaaap, ABplppaaaap, RIVR, RIVL, RM…	WBPaper00005337|pmid11806825, WBPaper00024570|pmid15530417, WBPaper00028691|pmid N.A., WBPaper00030888|pmid17663792, WBPaper00032573|pmid N.A., WBPaper00033175|pmid19452197, WBPaper00036408|pmid20592265, WBPaper00037956|pmid21179194, WBPaper00038491|pmid21647448, WBPaper00039035|pmid N.A., WBPaper00040970|pmid22494772, WBPaper00041364|pmid22887816, WBPaper00044960|pmid24595290, WBPaper00053288|pm…
chrIV	13882242	13882584	343	1	178352	NM_001268834	WBGene00004443	rpl-29	60S ribosomal protein L29	WBGene00004443	rpl-29	Caenorhabditis elegans	protein_coding_gene	B0513.3	CELE_B0513.3	B0513.3a.1, B0513.3b.1	CEOP4568	CE15559	CE15559|HMMPANTHER:PTHR12884:SF0|HMMPANTHER:PTHR12884|PFAM:PF01779|INTERPRO:IPR002673	D3YT71, O45226	O45226	N.A.	NM_001268835.3, NM_001268834.2	NP_001255764.1, NP_001255763.1	IV 10.90 +/- 0.00	mv_B0513.3, sjj_B0513.3|IV-7G20, cenix:218-f3	sterile F1	slow growth	gk597476|Substitution|Missense, gk825961|Substitution|Missense	dlg-1|Physical, hda-1|Physical, let-413|Physical, mdt-28|Physical, mut-16|Physical, pid-3|Physical, spc-1|Physical, tofu-6|Physical	N.A.	ADA, ASER, CAN, germ line, hermaphrodite distal tip cell, intestine, M cell, m2L, m2R, male distal tip cell, PVC, RID, RIG, RIH, somatic gonad precursor	N.A.	1-day post-L4 adult hermaphrodite Ce, 10-days post-L4 adult hermaphrodite Ce, 2-days post-L4 adult hermaphrodite Ce, 20-days post-L4 adult hermaphrodite Ce, 3-days post-L4 adult hermaphrodite Ce, 4-days post-L4 adult hermaphrodite Ce, 6-days post-L4 adult hermaphrodite Ce, 7-10 days post-L4 adult hermaphrodite Ce, 7-days post-L4 adult hermaphrodite Ce, adult Ce, adult hermaphrodite Ce, adult male…	N.A.	HGNC:10331|EnsEMBL-Compara;Panther;OrthoFinder;SonicParanoid;PhylomeDB;OrthoInspector	cytoplasmic translation, cytosolic large ribosomal subunit, ribonucleoprotein complex, ribosome, structural constituent of ribosome, translation	rpl-29 encodes a large ribosomal subunit L29 protein\; by homology, RPL-29 is predicted to function in protein biosynthesis\; in C. elegans, loss of rpl-29 function via RNA-mediated interference (RNAi) does not result in any obvious abnormalities.	Predicted to be a structural constituent of ribosome. Predicted to be involved in cytoplasmic translation. Predicted to be located in ribosome. Predicted to be part of cytosolic large ribosomal subunit. Is an ortholog of human RPL29 (ribosomal protein L29).	Enriched in germ line, ASER, somatic gonad precursor, M cell, ADA, CAN, hermaphrodite distal tip cell, male distal tip cell, m2R, m2L, PVC, RID, RIG, RIH and intestine according to proteomic study, RNA-seq, single-cell RNA-seq and microarray. Affected by cyc-1, daf-12, let-7, gld-1, tatn-1, jmjd-3.1, jmjd-1.2, hsf-1, lin-28, glh-4, glh-1, pgl-1, pgl-3, hrde-1, emb-4, sma-2, sma-4, pmt-2, F01D4.5,…	WBPaper00002874|pmid9275196, WBPaper00025088|pmid15837805, WBPaper00035149|pmid19703296, WBPaper00038491|pmid21647448, WBPaper00055090|pmid30120140
chrI	9751182	9751333	152	1	24104701	NR_101607	WBGene00219998	K02A11.12	ncRNA	WBGene00219998	K02A11.12	Caenorhabditis elegans	snoRNA_gene	K02A11.12	cel-inc69, CELE_K02A11.12	K02A11.12	N.A.	N.A.	N.A.	N.A.	N.A.	N.A.	NR_101607.1	N.A.	I 3.890762	N.A.	N.A.	N.A.	N.A.	N.A.	N.A.	N.A.	N.A.	N.A.	N.A.	N.A.	N.A.	N.A.	Is affected by cep-1 based on RNA-seq studies.	Affected by cep-1 according to RNA-seq.	N.A.
chrI	10553194	10553794	601	2	172939	NM_060360	WBGene00009119	ndk-1	Nucleoside diphosphate kinase	WBGene00009119	ndk-1	Caenorhabditis elegans	protein_coding_gene	F25H2.5	CELE_F25H2.5	F25H2.5.1, F25H2.5.2	N.A.	CE09650	CE09650|PhosphoPep:F25H2.5|HMMPANTHER:PTHR11349:SF103|HMMPANTHER:PTHR11349|PRINTS:PR01243|SCANPROSITE:PS00469|SMART:SM00562|PFAM:PF00334|SUPERFAMILY:SSF54919|INTERPRO:IPR001564|INTERPRO:IPR034907|INTERPRO:IPR036850|Active_site	Q93576	Q93576	TF106373	NM_001392936.1	NP_001379178.1	I 5.05 +/- 0.00	sjj_F25H2.5|I-5E18, mv_F25H2.5, cenix:134-f12	embryonic lethal, extended life span, fertility reduced, larval arrest, larval lethal, life span phenotype, pattern of transgene expression variant, protruding vulva, receptor mediated endocytosis defective, reduced brood size, sick, sterile, sterile F1, sterile progeny	lethal, sterile	tm525|Deletion|Frameshift, gk120892|Substitution|Missense, gk360868|Substitution|Missense, gk599576|Substitution|Missense, gk620895|Substitution|Missense, gk724099|Substitution|Missense, gk759869|Substitution|Missense	dlg-1|Physical, dyn-1|Physical, enri-2|Physical, erh-2|Physical, feh-1|Regulatory, hcp-3|Physical, ksr-1|Physical, ksr-2|Physical, myrf-1|Physical, myrf-2|Physical, ndk-1|Physical, ndk-1|Physical, pan-1|Physical, pid-3|Physical, pik-1|Physical, sec-6|Physical, sip-1|Physical, smo-1|Physical, spc-1|Physical, tofu-6|Physical, tost-1|Physical, uev-1|Physical	anal depressor muscle, body wall musculature, excretory cell, head, head neuron, hypodermis, intestine, nervous system, neuron, pharynx, rectal epithelium, reproductive system, tail neuron, ventral cord neuron, vulval muscle	AFD, anal depressor muscle, anterior gonadal sheath cell, anterior spermatheca, ASEL, ASG, AWB, AWC-OFF, AWC-ON, AWCL, AWCR, body wall musculature, CAN, ccAL, ccAR, ccD, ccDL, ccDR, ccPL, ccPR, excretory cell, excretory gland cell, FLP, germ line, hermaphrodite distal tip cell, hypodermis, intestine, M cell, male distal tip cell, muscle cell, NSM, OLL, pharynx, posterior gonadal sheath cell, Post…	adult Ce, embryo Ce, larva Ce	1-cell embryo Ce, 1-day post-L4 adult hermaphrodite Ce, 10-days post-L4 adult hermaphrodite Ce, 14-days post-L4 adult hermaphrodite Ce, 15-days post-L4 adult hermaphrodite Ce, 16-18 days post-L4 adult hermaphrodite Ce, 2-cell embryo Ce, 2-days post-L4 adult hermaphrodite Ce, 20-days post-L4 adult hermaphrodite Ce, 3-days post-L4 adult hermaphrodite Ce, 3-fold embryo Ce, 6-days post-L4 adult herma…	neuroblastoma|By Orthology, breast cancer|By Orthology, squamous cell carcinoma|By Orthology, ovary epithelial cancer|By Orthology, arteriosclerosis|By Orthology, ovarian cancer|By Orthology, teratoma|By Orthology, breast carcinoma|By Orthology, pancreatic ductal carcinoma|By Orthology, ovarian carcinoma|By Orthology, renal cell carcinoma|By Orthology, congestive heart failure|By Orthology, prost…	HGNC:7849|Hieranoid;Panther;OrthoFinder;SonicParanoid;Inparanoid;OMA;OrthoInspector, HGNC:7850|EnsEMBL-Compara;Hieranoid;Panther;OrthoFinder;SonicParanoid;Inparanoid;OMA;OrthoInspector, HGNC:7851|OrthoFinder;Panther;PhylomeDB, HGNC:7852|OrthoFinder;Panther;PhylomeDB, HGNC:31358|EnsEMBL-Compara;Hieranoid;Panther;OrthoFinder;SonicParanoid;Inparanoid;OMA;OrthoInspector, HGNC:33531|EnsEMBL-Compara;Hi…	ATP binding, CTP biosynthetic process, GTP biosynthetic process, identical protein binding, kinase activity, nucleoside diphosphate kinase activity, nucleoside diphosphate phosphorylation, nucleotide binding, phosphorylation, positive regulation of MAPK cascade, positive regulation of vulval development, protein binding, regulation of cell migration, regulation of engulfment of apoptotic cell, tr…	N.A.	Enables identical protein binding activity. Involved in several processes, including positive regulation of MAPK cascade\; positive regulation of vulval development\; and regulation of engulfment of apoptotic cell. Expressed in head. Human ortholog(s) of this gene implicated in several diseases, including carcinoma (multiple)\; prostatic hypertrophy\; and teratoma. Is an ortholog of human NME1-NM…	Enriched in body wall musculature, vulval muscle, intestine, pharynx, anal depressor muscle, hypodermis, PVD, OLL, NSM, Psub1, germ line, somatic gonad precursor, AWCR, AWCL, excretory cell, M cell, Z4, Z1, AFD, ASEL, ASG, AWB, AWC-OFF, AWC-ON, CAN, ccPR, ccPL, ccAR, ccAL, ccD, ccDR, ccDL, hermaphrodite distal tip cell, male distal tip cell, excretory gland cell, FLP, anterior gonadal sheath cell…	WBPaper00024325|pmid15274122, WBPaper00027108|pmid16481471, WBPaper00031674|pmid18401706, WBPaper00035098|pmid19645718, WBPaper00038491|pmid21647448, WBPaper00038664|pmid N.A., WBPaper00043986|pmid23900546, WBPaper00045025|pmid24658123, WBPaper00045279|pmid24829611, WBPaper00049595|pmid27109352, WBPaper00053078|pmid28920944, WBPaper00055090|pmid30120140, WBPaper00056558|pmid30952991, WBPaper00057…
chrV	10352710	10352836	127	2	4926989	NR_003477	WBGene00044963	K07C5.11	ncRNA	WBGene00044963	K07C5.11	Caenorhabditis elegans	snoRNA_gene	K07C5.11	CeN139 gene, CELE_K07C5.11	K07C5.11	N.A.	N.A.	N.A.	N.A.	N.A.	N.A.	NR_003477.1	N.A.	V 2.509980	N.A.	maternal sterile, protruding vulva	N.A.	ve565|Deletion|Frameshift	N.A.	N.A.	N.A.	N.A.	N.A.	N.A.	N.A.	N.A.	N.A.	Is affected by several genes including pgl-1\; cep-1\; and glh-1 based on RNA-seq studies.	Affected by cep-1, glh-4, glh-1, pgl-1, pgl-3, hmg-3, ints-8, ints-9, nfki-1 and swsn-1 according to RNA-seq.	N.A.
chrIII	794309	794669	361	1	175235	NM_064862	WBGene00004498	rps-29	40S ribosomal protein S29	WBGene00004498	rps-29	Caenorhabditis elegans	protein_coding_gene	B0412.4	CELE_B0412.4	B0412.4.1	CEOP3036	CE26849	CE26849|HMMPANTHER:PTHR12010:SF2|HMMPANTHER:PTHR12010|SCANPROSITE:PS00527|PFAM:PF00253|INTERPRO:IPR001209|INTERPRO:IPR039744|INTERPRO:IPR043140	P90983	P90983	TF300217	NM_001393266.1	NP_001379573.1	III -25.94 +/- 0.03	WBPaper00038381:B0412_1_1, mv_G_YK3285, TH:329b10, sjj_B0412.4|III-1C08, cenix:236-d5, cenix:329-b10	avoids bacterial lawn, cytoplasmic processing body variant, diplotene region organization variant, dumpy, early larval arrest, embryonic lethal, extended life span, germ cell compartment expansion variant, germ cell compartment morphology variant, germ cell development variant, germline nuclear positioning variant, gonad arm morphology variant, gonad development variant, gonad migration variant, …	N.A.	gk359581|Substitution|Missense, gk444448|Substitution|Missense	cdc-42|Physical, cep-1|Genetic, dlg-1|Physical, let-413|Physical, lgl-1|Physical, par-3|Physical, pid-3|Physical, pid-5|Physical, sip-1|Physical, smo-1|Physical, spc-1|Physical	body wall musculature, excretory cell, gonadal sheath cell, head neuron, mu_int_L, mu_int_R, nervous system, neuron, pharynx, reproductive system, tail neuron, ventral cord neuron, vulva	ADA, ADE, anterior spermatheca, ASER, body wall musculature, germ line, hermaphrodite distal tip cell, I4 neuron, intestine, M cell, M1 neuron, m2L, m2R, male distal tip cell, MI neuron, NSM, PDB, pharynx, Posterior spermatheca, PVC, PVM, PVR, RIG, RIH, somatic gonad precursor	adult Ce, larva Ce	1-day post-L4 adult hermaphrodite Ce, 10-days post-L4 adult hermaphrodite Ce, 11-15 days post-L4 adult hermaphrodite Ce, 2-days post-L4 adult hermaphrodite Ce, 20-days post-L4 adult hermaphrodite Ce, 3-days post-L4 adult hermaphrodite Ce, 3-fold embryo Ce, 4-days post-L4 adult hermaphrodite Ce, 5-days post-L4 adult hermaphrodite Ce, 6-days post-L4 adult hermaphrodite Ce, adult Ce, adult hermaphro…	Diamond-Blackfan anemia 13|By Orthology	HGNC:10419|EnsEMBL-Compara;Hieranoid;Panther;OrthoFinder;SonicParanoid;PhylomeDB;Inparanoid;OMA;OrthoInspector	cellular anatomical entity, cytosolic small ribosomal subunit, ribonucleoprotein complex, ribosome, structural constituent of ribosome, translation, zinc ion binding	rps-29 encodes a small ribosomal subunit S29 protein\; by homology, RPS-29 is predicted to function in protein biosynthesis\; in C. elegans, RPS-29 activity is broadly required for embryonic and germline development, normal body coloration and morphology, normal postembryonic growth rates, and the overall health of the animal.	Predicted to enable zinc ion binding activity. Predicted to be a structural constituent of ribosome. Predicted to be involved in translation. Predicted to be located in ribosome. Predicted to be part of cytosolic small ribosomal subunit. Human ortholog(s) of this gene implicated in Diamond-Blackfan anemia 13. Is an ortholog of human RPS29 (ribosomal protein S29).	Enriched in intestine, body wall musculature, pharynx, ASER, germ line, somatic gonad precursor, M cell, ADA, ADE, hermaphrodite distal tip cell, male distal tip cell, I4 neuron, M1 neuron, m2R, m2L, MI neuron, NSM, PDB, PVC, PVM, PVR, RIG, RIH, anterior spermatheca and Posterior spermatheca according to Chronogram analysis, RNA-seq, single-cell RNA-seq and microarray. Affected by aak-2, atx-3, n…	WBPaper00010022|pmid N.A., WBPaper00024230|pmid15194189, WBPaper00028564|pmid17023606, WBPaper00035215|pmid19763173, WBPaper00036019|pmid20308279, WBPaper00038491|pmid21647448, WBPaper00055090|pmid30120140
chrI	6789162	6789736	575	2	172401	NM_059543	WBGene00016493	C37A2.7	60S acidic ribosomal protein P2	WBGene00016493	C37A2.7	Caenorhabditis elegans	protein_coding_gene	C37A2.7	CELE_C37A2.7	C37A2.7.1	CEOP1352	CE30433	CE30433|PhosphoPep:C37A2.7|HMMPANTHER:PTHR21141|HMMPANTHER:PTHR21141:SF80|PFAM:PF00428|INTERPRO:IPR038716|INTERPRO:IPR044076	O01504	O01504	TF320650	NM_059543.8	NP_491944.2	I 1.320881	N.A.	cytoplasmic processing body variant, embryonic lethal, organism development variant, reduced brood size, slow growth, sterile, transgene expression increased, transgene induced cosuppression variant, transgene subcellular localization variant	N.A.	gk374346|Substitution|Missense, gk609441|Substitution|Missense, gk662468|Substitution|Missense	cacn-1|Physical, csr-1|Physical, elks-1|Physical, enri-2|Physical, erh-2|Physical, myrf-1|Physical, myrf-2|Physical, pan-1|Physical, pid-2|Physical, pid-3|Physical, prg-1|Physical, rla-0|Physical, rla-1|Physical, rpa-2|Genetic, sec-6|Physical, smo-1|Physical, tofu-6|Physical, wago-1|Physical	N.A.	ADA, AFD, anterior gonadal sheath cell, anterior spermatheca, ASER, CAN, germ line, hermaphrodite distal tip cell, I4 neuron, intestine, M cell, m2L, m2R, male distal tip cell, PLM, posterior gonadal sheath cell, Posterior spermatheca, Psub1, RIG, somatic gonad precursor	N.A.	1-day post-L4 adult hermaphrodite Ce, 10-days post-L4 adult hermaphrodite Ce, 11-15 days post-L4 adult hermaphrodite Ce, 2-cell embryo Ce, 2-days post-L4 adult hermaphrodite Ce, 20-days post-L4 adult hermaphrodite Ce, 3-days post-L4 adult hermaphrodite Ce, 3-fold embryo Ce, 4-cell embryo Ce, 4-days post-L4 adult hermaphrodite Ce, 6-days post-L4 adult hermaphrodite Ce, adult Ce, adult hermaphrodit…	N.A.	HGNC:10377|EnsEMBL-Compara;Hieranoid;Panther;OrthoFinder;SonicParanoid;Inparanoid;OMA;OrthoInspector	cytoplasmic translational elongation, cytosolic large ribosomal subunit, cytosolic ribosome, ribonucleoprotein complex, ribosome, structural constituent of ribosome	N.A.	Predicted to be a structural constituent of ribosome. Predicted to be involved in cytoplasmic translational elongation. Predicted to be located in cytosolic ribosome. Predicted to be part of cytosolic large ribosomal subunit. Is an ortholog of human RPLP2 (ribosomal protein lateral stalk subunit P2).	Enriched in Psub1, AFD, ASER, PLM, germ line, somatic gonad precursor, M cell, ADA, CAN, hermaphrodite distal tip cell, male distal tip cell, anterior gonadal sheath cell, posterior gonadal sheath cell, I4 neuron, m2R, m2L, RIG, anterior spermatheca, Posterior spermatheca and intestine according to RNA-seq, single-cell RNA-seq and microarray. Affected by aak-2, daf-12, daf-2, daf-16, let-7, gld-1…	WBPaper00028381|pmid16884526, WBPaper00038491|pmid21647448, WBPaper00049828|pmid27405932, WBPaper00055090|pmid30120140
chrII	6489067	6489452	386	2	174072	NM_001330951	WBGene00004916	snr-3	Sm domain-containing protein;putative small nuclear ribonucleoprotein Sm D1	WBGene00004916	snr-3	Caenorhabditis elegans	protein_coding_gene	T28D9.10	CELE_T28D9.10	T28D9.10a.1, T28D9.10b.1	N.A.	CE02065, CE51626	CE02065|HMMPANTHER:PTHR23338:SF52|HMMPANTHER:PTHR23338|SMART:SM00651|PFAM:PF01423|SUPERFAMILY:SSF50182|INTERPRO:IPR001163|INTERPRO:IPR010920|INTERPRO:IPR027141, CE51626|HMMPANTHER:PTHR23338|HMMPANTHER:PTHR23338:SF52|PFAM:PF01423|SUPERFAMILY:SSF50182|INTERPRO:IPR001163|INTERPRO:IPR010920|INTERPRO:IPR027141	Q10013, M1ZJ32	Q10013	N.A.	NM_062905.8, NM_001330951.3	NP_495306.1, NP_001317766.1	II -0.22 +/- 0.00	sjj_T28D9.10|II-5C19, cenix:135-f1, mv_T28D9.10	avoids bacterial lawn, cell proliferation increased, clear, embryonic arrest, embryonic lethal, excess intestinal cells, germ cell development variant, larval arrest, multivulva, no induction of antimicrobial peptide expression after infection, P granule localization defective, protein aggregation variant, protein subcellular localization variant, reduced brood size, sick, slow embryonic developm…	N.A.	gk458906|Substitution|Missense, gk589803|Substitution|Missense, h15565|Substitution|Missense	akir-1|Physical, dcr-1|Physical, glh-1|Physical, gpdh-1|Regulatory, hda-1|Physical, hsp-70|Regulatory, icln-1|Physical, lin-15A|Genetic, pid-3|Physical, pik-1|Physical, prg-1|Physical, rsr-2|Physical, sacy-1|Physical, sart-3|Physical, sec-6|Physical, tcer-1|Physical	gonad	ABalpapaap, ABalpappaa, ABalppppaa, ABalppppapa, ABalpppppa, ABalppppppa, ABarapapaa, ABarappaap, ABarppaapp, ABarpppapp, ABplaapaaa, ABplaapaap, ABplaapapa, ABplapaaaa, ABplapaaap, ABplapaaapa, ABplapappp, ABplapapppp, ABplapppaa, ABplpaaaaa, ABplpaapap, ABplpppaapa, ABpraaapaa, ABpraaapapa, ABpraaappa, ABpraaapppa, ABpraapaaa, ABpraapaap, ABpraapapa, ABprapaaaa, ABprapaaap, ABprapaaapa, ABprapa…	adult Ce, embryo Ce	1-day post-L4 adult hermaphrodite Ce, 10-days post-L4 adult hermaphrodite Ce, 2-days post-L4 adult hermaphrodite Ce, 20-days post-L4 adult hermaphrodite Ce, 3-days post-L4 adult hermaphrodite Ce, 3-fold embryo Ce, 5-days post-L4 adult hermaphrodite Ce, 6-days post-L4 adult hermaphrodite Ce, 7-10 days post-L4 adult hermaphrodite Ce, adult Ce, adult hermaphrodite Ce, adult male Ce, all stages Ce, b…	proteinuria|By Orthology, systemic lupus erythematosus|By Orthology, nasopharynx carcinoma|By Orthology, nephritis|By Orthology	HGNC:11158|EnsEMBL-Compara;Hieranoid;Panther;OrthoFinder;SonicParanoid;PhylomeDB;Inparanoid;OMA;OrthoInspector	catalytic step 2 spliceosome, commitment complex, cytoplasm, cytosol, intracellular organelle, mRNA processing, nucleus, P granule, pICln-Sm protein complex, precatalytic spliceosome, ribonucleoprotein complex, RNA binding, RNA processing, RNA splicing, SMN-Sm protein complex, spliceosomal complex, spliceosomal snRNP assembly, spliceosomal tri-snRNP complex, U1 snRNP, U12-type spliceosomal comple…	snr-3 encodes an ortholog of human small nuclear ribonucleoprotein Sm D1, a protein that forms part of a heptameric complex required for biogenesis and function of the snRNPs that catalyze mRNA splicing\; in combination with the gene that encodes the human Sm D2 ortholog (snr-4), snr-3 affects embryonic viability and nuclear association and localization of P granules in embryos, based on an RNAi …	Predicted to enable RNA binding activity. Predicted to be involved in spliceosomal snRNP assembly. Located in P granule. Expressed in gonad. Human ortholog(s) of this gene implicated in several diseases, including nasopharynx carcinoma\; nephritis\; and systemic lupus erythematosus. Is an ortholog of human SNRPD1 (small nuclear ribonucleoprotein D1 polypeptide).	Enriched in germ line, somatic gonad precursor, ABplapaaaa, ABprapaaaa, ABpraaapaa, ABalppppaa, ABprpaapap, ABplpaapap, ABpraaapppa, ABalppppppa, AQR, PVR, PQR, IL2 neuron, IL1 neuron, CEP, ADE, PDE, BAG, FLP, OLL, OLQ, PHA, PHB, ABarapapaa, ABalpappaa, MSpaapaa, ABpraaappa, ABalpppppa, ABplapaaapa, ABprapaaapa, ABprapaaap, ABplapaaap, ABarppaapp, ABarpppapp, ABpraapapa, ABplaapapa, ABplpaaaaa, A…	WBPaper00005457|pmid12225665, WBPaper00027057|pmid16439208, WBPaper00038491|pmid21647448, WBPaper00046572|pmid25753661, WBPaper00049828|pmid27405932, WBPaper00055090|pmid30120140
chrIII	6972260	6973615	1356	1	175976	NM_066120	WBGene00004340	rfc-4	Replication factor C subunit 4	WBGene00004340	rfc-4	Caenorhabditis elegans	protein_coding_gene	F31E3.3	CELE_F31E3.3	F31E3.3.1	N.A.	CE01268	CE01268|HMMPANTHER:PTHR11669:SF62|HMMPANTHER:PTHR11669|SMART:SM00382|PFAM:PF00004|SUPERFAMILY:SSF52540|INTERPRO:IPR003593|INTERPRO:IPR003959|INTERPRO:IPR027417	P53016	P53016	TF314424	NM_066120.8	NP_498521.1	III -0.86 +/- 0.00	TH:306g12, cenix:306-g12, mv_F31E3.3, sjj_F31E3.3|III-3N11, TH:340h10, cenix:340-h10	cell cell contacts abnormal in four cell embryo, cytokinesis fails early emb, ectopic cleavage furrow early emb, embryonic lethal, EMS anterior extension fails early emb, exaggerated asynchrony early emb, excessive blebbing early emb, multiple nuclei early emb, nucleus reforms cell division remnant early emb, pace of P lineage defective early emb, slow growth, sterile progeny	N.A.	gk417155|Substitution|Missense, gk458163|Substitution|Missense, gk522270|Substitution|Missense, gk719046|Substitution|Missense, otn9772|Substitution|Missense	ain-1|Physical, csr-1|Physical, enri-1|Physical, F44B9.8|Physical, hda-1|Physical, hpr-17|Physical, K09A11.1|Physical, let-711|Physical, mbk-2|Physical, nhl-2|Physical, nrde-3|Physical, rfc-1|Physical, rfc-3|Physical, rpn-9|Physical, smo-1|Physical, wdr-5.1|Physical, Y57G11C.22|Physical, zen-4|Physical	N.A.	ABalpappaa, ABalpapppa, ABarapapaa, ABarapappa, ABplapaaap, ABplpappaa, ABprapaaap, ADE, ADF, ADL, AFD, AQR, ASE, ASG, ASH, ASI, ASJ, ASK, AWA, AWB, AWC, BAG, CEP, FLP, germ line, IL1 neuron, IL2 neuron, MSaapapa, MSpapapa, OLL, OLQ, PDE, PHA, PHB, PQR, PVR, somatic gonad precursor	N.A.	1-day post-L4 adult hermaphrodite Ce, 10-days post-L4 adult hermaphrodite Ce, 2-days post-L4 adult hermaphrodite Ce, 20-days post-L4 adult hermaphrodite Ce, 3-days post-L4 adult hermaphrodite Ce, 3-fold embryo Ce, 4-days post-L4 adult hermaphrodite Ce, 5-days post-L4 adult hermaphrodite Ce, 6-days post-L4 adult hermaphrodite Ce, 7-10 days post-L4 adult hermaphrodite Ce, adult Ce, adult hermaphrod…	N.A.	HGNC:9972|EnsEMBL-Compara;Hieranoid;Panther;OrthoFinder;SonicParanoid;PhylomeDB;Inparanoid;OrthoInspector	ATP binding, ATP hydrolysis activity, DNA clamp loader activity, DNA repair, DNA replication factor C complex, DNA replication, DNA-templated DNA replication, nucleotide binding, nucleus, protein binding	N.A.	Predicted to enable ATP binding activity and ATP hydrolysis activity. Predicted to contribute to DNA clamp loader activity. Involved in DNA replication. Predicted to be located in nucleus. Predicted to be part of DNA replication factor C complex. Is an ortholog of human RFC4 (replication factor C subunit 4).	Enriched in germ line, somatic gonad precursor, ADF, ADL, AFD, ASE, ASG, ASH, ASI, ASJ, ASK, AWA, AWB, AWC, AQR, PVR, PQR, IL2 neuron, IL1 neuron, CEP, ADE, PDE, BAG, FLP, OLL, OLQ, PHA, PHB, ABplpappaa, MSpapapa, MSaapapa, ABarapappa, ABalpapppa, ABarapapaa, ABalpappaa, ABprapaaap and ABplapaaap according to proteomic study, RNA-seq and single-cell RNA-seq. Affected by cgh-1, cyc-1, daf-12, tatn…	WBPaper00005880|pmid12747829, WBPaper00026952|pmid16314527, WBPaper00038491|pmid21647448, WBPaper00055090|pmid30120140
chrIII	12225714	12226054	341	2	190705	NM_001136372	WBGene00013553	Y75B8A.18	Uncharacterized protein	WBGene00013553	Y75B8A.18	Caenorhabditis elegans	protein_coding_gene	Y75B8A.18	CELE_Y75B8A.18	Y75B8A.18a.1, Y75B8A.18b.1	CEOP3756	N.A.	N.A.	B2FDA5, B2FDA6	B2FDA5	N.A.	NM_067189.8, NM_001136372.3	NP_001129844.1, NP_499590.2	III 16.145210	N.A.	N.A.	N.A.	gk454358|Substitution|Missense, gk539451|Substitution|Missense, gk545776|Substitution|Missense, gk565198|Substitution|Missense	N.A.	N.A.	ABalaaaala, ABalaaaarl, ABalaaaarr, ABalaapaaa, ABalaapppp, ABalaappppa, ABalapaaaa, ABalapaapp, ABalapaappa, ABalapapap, ABalapapapa, ABalapappaa, ABalappapa, ABalapppaa, ABalapppap, ABalapppapa, ABalappppa, ABalappppaa, ABalpapaap, ABalpappaa, ABalpapppa, ABalppappa, ABalppappp, ABalppapppa, ABalpppapa, ABalpppappp, ABalppppaa, ABalppppapa, ABalpppppa, ABalpppppp, ABalppppppa, ABalppppppp, ABar…	N.A.	1-day post-L4 adult hermaphrodite Ce, 2-days post-L4 adult hermaphrodite Ce, 3-days post-L4 adult hermaphrodite Ce, 3-fold embryo Ce, 4-days post-L4 adult hermaphrodite Ce, 5-days post-L4 adult hermaphrodite Ce, 6-days post-L4 adult hermaphrodite Ce, 7-10 days post-L4 adult hermaphrodite Ce, adult Ce, adult hermaphrodite Ce, adult male Ce, all stages Ce, blastula embryo Ce, dauer larva Ce, embryo…	N.A.	N.A.	N.A.	N.A.	Enriched in AFD\; germ line\; hypodermis\; intestine\; and pharyngeal muscle cell based on tiling array and RNA-seq studies. Is affected by several genes including age-1\; dpy-10\; and clk-1 based on microarray and RNA-seq studies. Is affected by eleven chemicals including hydrogen sulfide\; rotenone\; and mianserin based on microarray and RNA-seq studies.	Enriched in hypodermis, intestine, pharyngeal muscle cell, AFD, germ line, ABarpaaa, ABplapaaaa, ABprapaaaa, ABpraaapaa, ABalppppaa, ABalaaaala, ABalaapaaa, ABprpaapap, ABplpaapap, ABpraaapppa, ABalppppppa, ABpraapappp, ABplaapappp, ABpraaaappp, ABalpppappp, ABalapaaaa, ABalappapa, ADF, ADL, ASE, ASG, ASH, ASI, ASJ, ASK, AWA, AWB, AWC, AQR, PVR, PQR, IL2 neuron, IL1 neuron, CEP, ADE, PDE, BAG, FL…	N.A.
chrI	13951750	13951876	127	2	13182893	NR_050709	WBGene00200705	Y71A12B.30	ncRNA	WBGene00200705	Y71A12B.30	Caenorhabditis elegans	ncRNA_gene	Y71A12B.30	CELE_Y71A12B.30	Y71A12B.30	N.A.	N.A.	N.A.	N.A.	N.A.	N.A.	NR_050709.1	N.A.	I 22.381990	N.A.	N.A.	N.A.	N.A.	N.A.	N.A.	N.A.	N.A.	N.A.	N.A.	N.A.	N.A.	N.A.	N.A.	N.A.	N.A.
chrII	6347263	6347686	424	2	174050	NM_062876	WBGene00002980	lgg-1	Protein lgg-1	WBGene00002980	lgg-1	Caenorhabditis elegans	protein_coding_gene	C32D5.9	2G636, atg-8.1, CELE_C32D5.9	C32D5.9.1	CEOP2240	CE01849	CE01849|HMMPANTHER:PTHR10969:SF33|HMMPANTHER:PTHR10969|PFAM:PF02991|SUPERFAMILY:SSF54236|INTERPRO:IPR004241|INTERPRO:IPR029071	Q09490	Q09490	TF314556	NM_062876.8	NP_495277.1	II -0.38 +/- 0.00	sjj_C32D5.9|II-4P03, sjj2_C32D5.9.1|II-10K04, mv_C32D5.9, cenix:203-d3	autophagy reduced, autophagy variant, dauer body morphology variant, dauer development phenotype, embryonic lethal, embryonic lethal late emb, exopher production in muscle decreased, extended life span, growth variant, L1 lethal, larval arrest, life span phenotype, necrotic cell death variant, neuron degeneration, organism starvation hypersensitive, P granule localization defective, pathogen indu…	accumulated cell corpses, accumulated somatic cell corpses, autophagy variant, embryonic morphology defective early emb, engulfment failure by killer cell, larval lethal, lethal, persistence of paternal mitochondria, phagosome maturation defective, phosphatidylinositol 3-phosphate levels reduced, sterile, transgene subcellular localization variant	tm3489|Deletion|Frameshift, bp500|Substitution|Nonsense, bp523|Substitution|Missense, gk597252|Substitution|Missense, gk777923|Substitution|Missense, gk792260|Substitution|Missense	atg-7|Physical;Regulatory, dut-1|Genetic;Regulatory, glp-1|Genetic;Regulatory, lipl-4|Genetic;Regulatory, sepa-1|Physical;Regulatory, unc-51|Physical;Regulatory, acds-10|Physical, acs-5|Physical, ain-1|Physical, allo-1|Physical, anc-1|Physical, atad-3|Physical, atf-2|Regulatory, atg-13|Physical, atg-18|Regulatory, atg-3|Physical, atg-4.1|Physical, atg-4.2|Physical, atp-2|Physical, atp-3|Physical,…	body wall musculature, Cell, germ cell, gonad, head, head neuron, hypodermis, intestine, nerve ring, nervous system, neuron, pharynx, seam cell, tail, tail neuron, touch receptor neuron, ventral cord neuron, ventral nerve cord, vulva, vulval muscle	AFD, AIZ, ASER, AVG, germ line, intestine, neuron, NSM, PDE, sensory neuron, VB1, VB10, VB11, VB2, VB3, VB4, VB5, VB6, VB7, VB8, VB9	adult Ce, embryo Ce, larva Ce	1-day post-L4 adult hermaphrodite Ce, 10-days post-L4 adult hermaphrodite Ce, 2-days post-L4 adult hermaphrodite Ce, 20-days post-L4 adult hermaphrodite Ce, 3-days post-L4 adult hermaphrodite Ce, 4-days post-L4 adult hermaphrodite Ce, 6-days post-L4 adult hermaphrodite Ce, 7-10 days post-L4 adult hermaphrodite Ce, adult Ce, adult hermaphrodite Ce, adult male Ce, all stages Ce, blastula embryo Ce,…	N.A.	HGNC:4067|Hieranoid;Panther;OrthoFinder;SonicParanoid;PhylomeDB;Inparanoid;OMA;OrthoInspector, HGNC:4068|EnsEMBL-Compara;Panther;OrthoFinder;SonicParanoid;PhylomeDB;Inparanoid;OrthoInspector, HGNC:4069|OrthoFinder;EnsEMBL-Compara;PhylomeDB;Panther	autophagosome assembly, autophagosome membrane, autophagosome, autophagy of mitochondrion, autophagy, cell projection, cellular response to nitrogen starvation, cellular response to toxic substance, cytoplasm, cytoplasmic vesicle, cytosol, dauer larval development, defense response to Gram-positive bacterium, dendrite, determination of adult lifespan, GABA receptor binding, lysosomal lumen, lysos…	lgg-1 encodes the C. elegans ortholog of Saccharomyces cerevisiae Atg8p and mammalian MAP-LC3\; by homology, LGG-1 is predicted to be required for the degradation of cellular components by autophagy\; loss of lgg-1 function via RNAi indicates that, like several other C. elegans genes involved in autophagy, lgg-1 is essential for normal dauer morphogenesis and life-span extension\; a GFP::LGG-1 re…	Predicted to enable GABA receptor binding activity and ubiquitin protein ligase binding activity. Involved in several processes, including defense response to other organism\; plasma membrane repair\; and positive regulation of autophagosome assembly. Located in bounding membrane of organelle\; neuron projection\; and neuronal cell body. Expressed in several structures, including egg-laying appar…	Enriched in NSM, AFD, ASER, germ line, sensory neuron, AIZ, AVG, PDE, VB1, VB2, VB11, VB10, VB9, VB8, VB7, VB6, VB5, VB4, VB3, intestine and neuron according to RNA-seq, single-cell RNA-seq and microarray. Affected by cgh-1, isp-1, aak-2, csr-1, clk-1, cox-5B, hsf-1, kgb-1, hlh-30, mir-34, cebp-1, glh-4, glh-1, pgl-1, pgl-3, emb-4, nlg-1, sma-2, sma-4, lin-22, daf-2, nuo-6, eat-2, unc-70, iff-1, …	WBPaper00006070|pmid12958363, WBPaper00011904|pmid N.A., WBPaper00024811|pmid N.A., WBPaper00025861|pmid N.A., WBPaper00025945|pmid N.A., WBPaper00026086|pmid N.A., WBPaper00027091|pmid16467519, WBPaper00028380|pmid16884547, WBPaper00029139|pmid17327275, WBPaper00029395|pmid17507392, WBPaper00030896|pmid17675890, WBPaper00031028|pmid17890369, WBPaper00031045|pmid17901876, WBPaper00031459|pmid1821…
chrIII	13463231	13464339	1109	1	176773	NM_001027628	WBGene00006439	ant-1.1	ADP/ATP translocase	WBGene00006439	ant-1.1	Caenorhabditis elegans	protein_coding_gene	T27E9.1	tag-61, wan-1, CELE_T27E9.1	T27E9.1.1, T27E9.1b:wp275, T27E9.1c:wp275	CEOP3800	CE14263	CE14263|PhosphoPep:T27E9.1|HMMPANTHER:PTHR45635|HMMPANTHER:PTHR45635:SF17|PFSCAN:PS50920|PRINTS:PR00926|PRINTS:PR00927|PFAM:PF00153|SUPERFAMILY:SSF103506|INTERPRO:IPR002067|INTERPRO:IPR002113|INTERPRO:IPR018108|INTERPRO:IPR023395	O45865	O45865	N.A.	NM_001027628.8	NP_001022799.1	III 21.22 +/- 0.00	cenix:341-d10, mv_T27E9.1, TH:321g6, TH:341d10, cenix:321-g6, sjj_T27E9.1|III-6N21	anterior pharynx extra cells, apoptosis reduced, avoids bacterial lawn, cell corpse number decreased, dauer constitutive, early larval arrest, embryonic lethal, extended life span, foraging behavior variant, general pace of development defective early emb, larval arrest, maternal sterile, mRNA levels increased, nicotine hypersensitive, no induction of antimicrobial peptide expression after infect…	N.A.	gk172|Deletion|Frameshift, gk190526|Substitution|Missense, gk410549|Substitution|Missense, gk599319|Substitution|Missense, gk607797|Substitution|Missense	ced-4|Physical;Genetic, actl-1|Physical, ant-1.1|Physical, ant-1.1|Physical, ant-1.3|Physical, cdap-2|Physical, cdc-42|Physical, ced-3|Genetic, ced-9|Physical, cfp-1|Physical, daf-12|Genetic, daf-3|Physical, dlg-1|Physical, glh-1|Physical, goa-1|Physical, hsp-16.2|Regulatory, hsp-4|Regulatory, hsp-60|Regulatory, hsp-6|Regulatory, igdb-2|Physical, jip-1|Physical, lec-1|Physical, let-413|Physical, …	anterior distal tip cell, body wall musculature, gonadal sheath cell, hypodermis, intestine, neuron, pharynx, posterior distal tip cell, vulva	anterior gonadal sheath cell, anterior spermatheca, AWC-OFF, CAN, ccAL, ccAR, ccD, ccDL, ccDR, ccPL, ccPR, CEM, germ line, hermaphrodite distal tip cell, HOB, IL2 neuron, intestine, male distal tip cell, posterior gonadal sheath cell, Posterior spermatheca, ray neuron type B, RIA	adult Ce, embryo Ce, L1 larva Ce, L2 larva Ce, L3 larva Ce, L4 larva Ce	1-cell embryo Ce, 1-day post-L4 adult hermaphrodite Ce, 11-15 days post-L4 adult hermaphrodite Ce, 14-days post-L4 adult hermaphrodite Ce, 15-days post-L4 adult hermaphrodite Ce, 16-18 days post-L4 adult hermaphrodite Ce, 2-days post-L4 adult hermaphrodite Ce, 3-days post-L4 adult hermaphrodite Ce, 3-fold embryo Ce, 5-days post-L4 adult hermaphrodite Ce, 6-days post-L4 adult hermaphrodite Ce, 7-1…	mitochondrial myopathy|By Orthology, mitochondrial metabolism disease|By Experiment, hypertrophic cardiomyopathy|By Orthology, chronic progressive external ophthalmoplegia|By Orthology, mitochondrial DNA depletion syndrome 12a|By Orthology, mitochondrial DNA depletion syndrome 12b|By Orthology, dilated cardiomyopathy 1H|By Orthology, autosomal dominant progressive external ophthalmoplegia with mi…	HGNC:10990|EnsEMBL-Compara;Hieranoid;SonicParanoid;Inparanoid;OMA;OrthoInspector, HGNC:10991|EnsEMBL-Compara;Hieranoid;SonicParanoid;Inparanoid;OMA;OrthoInspector, HGNC:10992|EnsEMBL-Compara;Hieranoid;SonicParanoid;Inparanoid;OMA;OrthoInspector	ATP:ADP antiporter activity, determination of adult lifespan, integral component of membrane, membrane, mitochondrial ADP transmembrane transport, mitochondrial ATP transmembrane transport, mitochondrial inner membrane, mitochondrion organization, mitochondrion, negative regulation of mitochondrial outer membrane permeabilization involved in apoptotic signaling pathway, positive regulation of apo…	ant-1.1 encodes one of four C. elegans mitochondrial adenine nucleotide transporters\; by homology, ANT-1.1 is predicted to facilitate ADP\/ATP exchange between the cytosol and mitochondria\; ant-1.1 is an essential gene, required for embryogenesis as well as for normal postembryonic body size and adult lifespan\; in addition, ANT-1.1 plays a critical role in promoting somatic and germline progra…	Predicted to enable ATP:ADP antiporter activity. Involved in determination of adult lifespan\; mitochondrion organization\; and positive regulation of apoptotic process. Located in mitochondrion. Expressed in several structures, including body wall musculature\; hermaphrodite somatic gonadal cell\; intestine\; pharynx\; and vulva. Used to study mitochondrial metabolism disease. Human ortholog(s) …	Enriched in HOB, IL2 neuron, CEM, ray neuron type B, germ line, AWC-OFF, CAN, ccPR, ccPL, ccAR, ccAL, ccD, ccDR, ccDL, hermaphrodite distal tip cell, male distal tip cell, anterior gonadal sheath cell, posterior gonadal sheath cell, intestine, RIA, anterior spermatheca and Posterior spermatheca according to RNA-seq and single-cell RNA-seq. Affected by sti-1, daf-12, K10D11.2, lec-1, let-7, gld-1,…	WBPaper00029402|pmid17512141, WBPaper00031899|pmid18498090, WBPaper00033208|pmid19467242, WBPaper00035218|pmid19770033, WBPaper00038491|pmid21647448, WBPaper00043844|pmid N.A., WBPaper00049531|pmid27129311, WBPaper00055090|pmid30120140, WBPaper00056095|pmid30686527, WBPaper00056909|pmid31214513, WBPaper00061870|pmid34467850
chrIV	653538	654571	1034	2	176891	NM_067563	WBGene00004427	rpl-15	60S ribosomal protein L15	WBGene00004427	rpl-15	Caenorhabditis elegans	protein_coding_gene	K11H12.2	CELE_K11H12.2	K11H12.2.1	CEOP4032	CE12148	CE12148|HMMPANTHER:PTHR11847|HMMPANTHER:PTHR11847:SF4|SCANPROSITE:PS01194|SMART:SM01384|PFAM:PF00827|SUPERFAMILY:SSF54189|INTERPRO:IPR000439|INTERPRO:IPR012678|INTERPRO:IPR024794	P91374	P91374	TF300050	NM_067563.8	NP_499964.1	IV -23.70 +/- 0.01	mv_G_YK2043, cenix:116-d1, sjj_K11H12.2|IV-1A14	apoptosis fails to occur, apoptosis reduced, diplotene absent during oogenesis, embryonic lethal, germ cell compartment expansion absent, germ cell compartment expansion variant, gonad small, gonad vesiculated, larval arrest, larval lethal, maternal sterile, molt defect, no oocytes, nuclei small, oocyte number decreased, pachytene progression during oogenesis variant, pachytene region organizatio…	N.A.	gk602880|Substitution|Missense, gk651842|Substitution|Missense, gk802230|Substitution|Missense	alg-1|Physical, csr-1|Physical, dep-1|Physical, elks-1|Physical, enri-2|Physical, glh-1|Physical, myrf-1|Physical, nrde-2|Physical, pid-3|Physical, pqn-59|Physical, prg-1|Physical, sec-6|Physical, sip-1|Physical, smo-1|Physical, spc-1|Physical, tofu-6|Physical, wago-1|Physical	N.A.	anterior spermatheca, CAN, excretory cell, excretory gland cell, germ line, hermaphrodite distal tip cell, I4 neuron, M cell, m2L, m2R, male distal tip cell, NSM, Posterior spermatheca, RIG, somatic gonad precursor	N.A.	1-cell embryo Ce, 1-day post-L4 adult hermaphrodite Ce, 10-days post-L4 adult hermaphrodite Ce, 11-15 days post-L4 adult hermaphrodite Ce, 16-18 days post-L4 adult hermaphrodite Ce, 2-days post-L4 adult hermaphrodite Ce, 20-days post-L4 adult hermaphrodite Ce, 3-days post-L4 adult hermaphrodite Ce, 3-fold embryo Ce, 5-days post-L4 adult hermaphrodite Ce, 6-days post-L4 adult hermaphrodite Ce, 7-1…	Diamond-Blackfan anemia 12|By Orthology	HGNC:10306|EnsEMBL-Compara;Hieranoid;Panther;OrthoFinder;SonicParanoid;PhylomeDB;Inparanoid;OMA;OrthoInspector	cytoplasmic translation, cytosolic large ribosomal subunit, ribonucleoprotein complex, ribosome, RNA binding, structural constituent of ribosome, translation	rpl-15 encodes a large ribosomal subunit L15 protein.	Predicted to enable RNA binding activity. Predicted to be a structural constituent of ribosome. Predicted to be involved in cytoplasmic translation. Predicted to be located in ribosome. Predicted to be part of cytosolic large ribosomal subunit. Human ortholog(s) of this gene implicated in Diamond-Blackfan anemia 12. Is an ortholog of human RPL15 (ribosomal protein L15).	Enriched in germ line, somatic gonad precursor, excretory cell, M cell, CAN, hermaphrodite distal tip cell, male distal tip cell, excretory gland cell, I4 neuron, m2R, m2L, NSM, RIG, anterior spermatheca and Posterior spermatheca according to RNA-seq and single-cell RNA-seq. Affected by atx-3, daf-12, let-7, gld-1, rsks-1, cox-5B, jmjd-3.1, jmjd-1.2, hsf-1, dep-1, glh-4, glh-1, pgl-1, pgl-3, atm-…	WBPaper00038491|pmid21647448, WBPaper00049828|pmid27405932, WBPaper00055090|pmid30120140
chrIV	2890927	2891494	568	1	24105155	NM_001276811	WBGene00235102	dib-1	Thioredoxin-like protein	WBGene00235102	dib-1	Caenorhabditis elegans	protein_coding_gene	Y54G2A.75	CELE_Y54G2A.75	Y54G2A.75.1	N.A.	CE48128	CE48128|HMMPANTHER:PTHR12052|HMMPANTHER:PTHR12052:SF9|PIRSF:PIRSF017199|SMART:SM01410|PFAM:PF02966|SUPERFAMILY:SSF52833|INTERPRO:IPR004123|INTERPRO:IPR036249	L8E6I4	L8E6I4	N.A.	NM_001276811.4	NP_001263740.1	IV -6.724021	sjj2_Y54G2A.5a.1|IV-10C05	early embryonic lethal, embryonic lethal	N.A.	gk388437|Substitution|Missense	N.A.	N.A.	AFD, germ line, PLM	N.A.	1-day post-L4 adult hermaphrodite Ce, 2-days post-L4 adult hermaphrodite Ce, 3-fold embryo Ce, 6-days post-L4 adult hermaphrodite Ce, 7-10 days post-L4 adult hermaphrodite Ce, adult Ce, adult hermaphrodite Ce, all stages Ce, blastula embryo Ce, embryo Ce, L1 larva Ce, L2d larva Ce, L3 larva Ce, L4 larva Ce	Burn-McKeown syndrome|By Orthology	HGNC:30551|EnsEMBL-Compara;Hieranoid;Panther;OrthoFinder;SonicParanoid;PhylomeDB;Inparanoid;OMA;OrthoInspector	mRNA processing, mRNA splicing, via spliceosome, nucleus, RNA splicing, spliceosomal complex, U4/U6 x U5 tri-snRNP complex, U5 snRNP	N.A.	Predicted to be involved in mRNA splicing, via spliceosome. Predicted to be located in nucleus. Predicted to be part of U4\/U6 x U5 tri-snRNP complex\; U5 snRNP\; and spliceosomal complex. Human ortholog(s) of this gene implicated in Burn-McKeown syndrome. Is an ortholog of human TXNL4A (thioredoxin like 4A).	Enriched in AFD, PLM and germ line according to RNA-seq. Affected by sma-4, daf-2, pfd-6, aak-1, aak-2, sin-3, sftb-1, set-2, hlh-11, fbf-1, mir-243, gld-1 and tdp-1 according to RNA-seq and microarray. Affected by Zidovudine according to RNA-seq.	WBPaper00055090|pmid30120140
chrII	9056534	9056829	296	2	174443	NM_001267266	WBGene00004446	rpl-32	60S ribosomal protein L32	WBGene00004446	rpl-32	Caenorhabditis elegans	protein_coding_gene	T24B8.1	CELE_T24B8.1	T24B8.1a.1, T24B8.1b.1	N.A.	CE03709, CE43313	CE03709|PhosphoPep:T24B8.1a|HMMPANTHER:PTHR23413|HMMPANTHER:PTHR23413:SF1|SCANPROSITE:PS00580|SMART:SM01393|PFAM:PF01655|SUPERFAMILY:SSF52042|INTERPRO:IPR001515|INTERPRO:IPR036351, CE43313|HMMPANTHER:PTHR23413|HMMPANTHER:PTHR23413:SF1|SMART:SM01393|PFAM:PF01655|SUPERFAMILY:SSF52042|INTERPRO:IPR001515|INTERPRO:IPR036351	Q22716, B7WN95	Q22716	TF314947	NM_001267266.3, NM_001267265.5	NP_001254194.1, NP_001254195.1	II 1.00	cenix:238-h1, sjj_T24B8.1, mv_T24B8.1	avoids bacterial lawn, larval arrest, maternal sterile, molt defect, slow growth, transgene expression variant	lethal, sterile	N.A.	alg-1|Physical, cdc-42|Physical, cey-4|Physical, chd-1|Physical, csr-1|Physical, dlg-1|Physical, elks-1|Physical, glh-1|Physical, let-413|Physical, lgl-1|Physical, myrf-1|Physical, myrf-2|Physical, nrde-2|Physical, pan-1|Physical, par-3|Physical, pid-3|Physical, pid-5|Physical, prg-1|Physical, sart-3|Physical, sec-6|Physical, sip-1|Physical, spc-1|Physical, tofu-6|Physical, tost-1|Physical, usip-…	anterior distal tip cell, body wall musculature, excretory cell, head neuron, intestine, nerve ring, nervous system, neuron, pharynx, posterior distal tip cell, reproductive system, seam cell, tail neuron, ventral cord neuron	ADA, AFD, anterior spermatheca, ASER, body wall musculature, CAN, dorsal nerve cord, excretory gland cell, germ line, hermaphrodite distal tip cell, I4 neuron, lateral nerve cord, M cell, m2L, m2R, male distal tip cell, nerve ring, pharynx, PLM, Posterior spermatheca, Psub1, RIG, RIH, somatic gonad precursor, somatic neuron, tail neuron, ventral nerve cord, vulval muscle	adult Ce, larva Ce	1-day post-L4 adult hermaphrodite Ce, 10-days post-L4 adult hermaphrodite Ce, 11-15 days post-L4 adult hermaphrodite Ce, 16-18 days post-L4 adult hermaphrodite Ce, 2-cell embryo Ce, 2-days post-L4 adult hermaphrodite Ce, 20-days post-L4 adult hermaphrodite Ce, 24-cell embryo Ce, 3-days post-L4 adult hermaphrodite Ce, 3-fold embryo Ce, 6-days post-L4 adult hermaphrodite Ce, adult Ce, adult hermaph…	N.A.	HGNC:10336|EnsEMBL-Compara;Hieranoid;Panther;OrthoFinder;SonicParanoid;PhylomeDB;Inparanoid;OMA;OrthoInspector	cytosolic large ribosomal subunit, ribonucleoprotein complex, ribosome, structural constituent of ribosome, translation	rpl-32 encodes a large ribosomal subunit L32 protein.	Predicted to be a structural constituent of ribosome. Predicted to be involved in translation. Predicted to be located in ribosome. Predicted to be part of cytosolic large ribosomal subunit. Is an ortholog of human RPL32 (ribosomal protein L32).	Enriched in body wall musculature, vulval muscle, ventral nerve cord, nerve ring, dorsal nerve cord, somatic neuron, tail neuron, lateral nerve cord, pharynx, Psub1, AFD, ASER, PLM, germ line, somatic gonad precursor, M cell, ADA, CAN, hermaphrodite distal tip cell, male distal tip cell, excretory gland cell, I4 neuron, m2R, m2L, RIG, RIH, anterior spermatheca and Posterior spermatheca according …	WBPaper00038491|pmid21647448, WBPaper00055090|pmid30120140, WBPaper00061547|pmid34166401, WBPaper00062311|pmid34941747
chrII	11451663	11452945	1283	2	174747	NM_064040	WBGene00004699	rsp-2	putative splicing factor, arginine/serine-rich 2	WBGene00004699	rsp-2	Caenorhabditis elegans	protein_coding_gene	W02B12.2	srp-4, CeSRp40, CELE_W02B12.2	W02B12.2.1	N.A.	CE03762	CE03762|HMMPANTHER:PTHR23003:SF36|HMMPANTHER:PTHR23003|PFSCAN:PS50102|SMART:SM00360|PFAM:PF00076|SUPERFAMILY:SSF54928|INTERPRO:IPR000504|INTERPRO:IPR012677|INTERPRO:IPR035979	Q23120	Q23120	TF351335	NM_064040.7	NP_496441.1	II 3.47 +/- 0.00	mv_W02B12.2, sjj_W02B12.2|II-7F16, cenix:116-d12, smd_W02B12.2	cell proliferation increased, dumpy, early larval arrest, embryonic lethal, embryonic lethal late emb, embryonic morphology variant, excess intestinal cells, exploded through vulva, larval arrest, larval lethal, protein aggregation variant, protruding vulva, reduced brood size, slow growth, somatic gonad morphology variant, sperm morphology variant, spermatogenesis variant, sterile F1, transgene …	N.A.	gk155167|Substitution|Missense, gk321495|Substitution|Missense, gk386094|Substitution|Missense, gk396403|Substitution|Missense, gk412034|Substitution|Missense, gk429994|Substitution|Missense, gk450563|Substitution|Missense, gk453599|Substitution|Missense, gk456650|Substitution|Missense, gk716284|Substitution|Nonsense, gk786626|Substitution|Missense, gk868406|Substitution|Missense	csr-1|Physical, dlg-1|Physical, malt-1|Physical, nrde-2|Physical, zen-4|Physical	Cell	ABalapapapa, ABalapppapa, ABplaapappp, ABplpaaappa, ABpraapappp, ABprpaaappa, ASGL, ASGR, AWAL, AWAR, CAN, CANL, CANR, germ line, neuron, NSM, OLL, PVD	adult Ce, embryo Ce	1-day post-L4 adult hermaphrodite Ce, 10-days post-L4 adult hermaphrodite Ce, 2-days post-L4 adult hermaphrodite Ce, 20-days post-L4 adult hermaphrodite Ce, 3-days post-L4 adult hermaphrodite Ce, 5-days post-L4 adult hermaphrodite Ce, 6-days post-L4 adult hermaphrodite Ce, 7-10 days post-L4 adult hermaphrodite Ce, adult Ce, adult hermaphrodite Ce, adult male Ce, all stages Ce, blastula embryo Ce,…	colon adenocarcinoma|By Orthology, lung cancer|By Orthology, breast cancer|By Orthology, skin cancer|By Orthology, clear cell renal cell carcinoma|By Orthology, proliferative diabetic retinopathy|By Orthology, spermatogenic failure 3|By Orthology	HGNC:10787|OMA;Panther;OrthoInspector, HGNC:10788|OMA;Panther;OrthoInspector	cell differentiation, gonad development, gonadal mesoderm development, mRNA binding, mRNA processing, mRNA splicing, via spliceosome, nematode larval development, nuclear speck, nucleic acid binding, nucleus, regulation of growth rate, RNA binding, RNA splicing, spermatogenesis	rsp-2 encodes the C. elegans ortholog of the vertebrate SRp40 splicing factor and member of the SR protein family of nuclear phosphoproteins that are required for constitutive splicing and influence alternative splicing regulation.	Predicted to enable mRNA binding activity. Involved in developmental process involved in reproduction\; nematode larval development\; and regulation of growth rate. Located in nucleus. Expressed widely. Human ortholog(s) of this gene implicated in several diseases, including Huntington's disease\; clear cell renal cell carcinoma\; and proliferative diabetic retinopathy. Is an ortholog of human SR…	Enriched in germ line, PVD, OLL, NSM, AWAR, AWAL, ASGR, ASGL, ABpraapappp, ABplaapappp, CANR, CANL, ABalapppapa, ABalapapapa, ABplpaaappa, ABprpaaappa, CAN and neuron according to proteomic study, microarray, RNA-seq and single-cell RNA-seq. Affected by zfp-1, cyc-1, let-7, gld-1, lem-2, emr-1, gld-2, rsks-1, npr-1, jmjd-3.1, jmjd-1.2, mir-34, sma-4, smg-2, isp-1, nuo-6, aak-1, aak-2, smn-1, unc-…	WBPaper00003988|pmid10747030, WBPaper00004261|pmid10906451, WBPaper00029295|pmid17437990, WBPaper00030791|pmid17562857, WBPaper00032249|pmid18842128, WBPaper00032289|pmid18946043, WBPaper00038491|pmid21647448, WBPaper00049828|pmid27405932, WBPaper00055090|pmid30120140, WBPaper00063034|pmid N.A.
chrIII	12978009	12978521	513	2	176718	NM_067294	WBGene00006728	ubq-2	Ubiquitin	WBGene00006728	ubq-2	Caenorhabditis elegans	protein_coding_gene	ZK1010.1	rpl-40.1, rpl-40, ubiB, CELE_ZK1010.1	ZK1010.1.1	CEOP3768	CE15495	CE15495|HMMPANTHER:PTHR10666|HMMPANTHER:PTHR10666:SF368|PFSCAN:PS50053|PRINTS:PR00348|SCANPROSITE:PS00299|SMART:SM01377|SMART:SM00213|PFAM:PF00240|PFAM:PF01020|SUPERFAMILY:SSF54236|INTERPRO:IPR000626|INTERPRO:IPR001975|INTERPRO:IPR019956|INTERPRO:IPR029071|INTERPRO:IPR038587	P49632	P49632	TF352129	NM_067294.6	NP_499695.1	III 20.69 +/- 0.00	cenix:341-f5, mv_AAC37252, TH:329a6, sjj_ZK1010.1|III-6B07, TH:341f5, cenix:329-a6	apoptosis fails to occur, apoptosis reduced, cell membrane organization biogenesis variant, diplotene absent during oogenesis, embryonic lethal, embryonic polarity variant, germ cell compartment expansion absent, germ cell compartment expansion variant, gonad small, gonad vesiculated, larval arrest, maternal sterile, no oocytes, nuclei small, oocyte number decreased, pachytene progression during …	N.A.	gk633371|Substitution|Missense, gk702483|Substitution|Missense, gk929213|Substitution|Missense, gk929214|Substitution|Missense	cey-4|Physical, cfp-1|Physical, dve-1|Physical, elt-2|Regulatory, erh-2|Physical, F26F2.1|Regulatory, lin-53|Physical, madf-9|Physical, mut-16|Physical, myrf-1|Physical, myrf-2|Physical, nrde-2|Physical, pals-5|Regulatory, pan-1|Physical, par-2|Regulatory, par-3|Regulatory, pid-3|Physical, prx-14|Physical, prx-5|Physical, rde-10|Physical, rde-8|Physical, spc-1|Physical, tofu-6|Physical, tost-1|Ph…	anterior distal tip cell, body wall musculature, gonadal sheath cell, hypodermis, intestine, nerve ring, pharyngeal-intestinal valve, pharynx, posterior distal tip cell, spermatheca, uterus, ventral cord neuron, vulA, vulB1, vulB2, vulC, vulD, vulE, vulF	ADA, AFD, anterior spermatheca, ASER, cephalic sheath cell, excretory cell, germ line, hermaphrodite distal tip cell, I4 neuron, M cell, m2L, m2R, male distal tip cell, MCL, MCR, neuron, NSM, PLM, Posterior spermatheca, RIG, somatic gonad precursor	adult Ce, dauer larva Ce, embryo Ce, L1 larva Ce, L2 larva Ce, L3 larva Ce, L4 larva Ce	1-day post-L4 adult hermaphrodite Ce, 10-days post-L4 adult hermaphrodite Ce, 11-15 days post-L4 adult hermaphrodite Ce, 2-days post-L4 adult hermaphrodite Ce, 20-days post-L4 adult hermaphrodite Ce, 24-cell embryo Ce, 3-days post-L4 adult hermaphrodite Ce, 3-fold embryo Ce, 6-days post-L4 adult hermaphrodite Ce, adult Ce, adult hermaphrodite Ce, adult male Ce, all stages Ce, dauer larva Ce, embr…	colon carcinoma|By Orthology	HGNC:12458|EnsEMBL-Compara;Hieranoid;OrthoFinder;SonicParanoid;Inparanoid;OMA;OrthoInspector	cytoplasm, cytosolic small ribosomal subunit, modification-dependent protein catabolic process, nucleus, polarity specification of anterior/posterior axis, protein tag, protein ubiquitination, ribonucleoprotein complex, ribosome, structural constituent of ribosome, translation, ubiquitin protein ligase binding	ubq-2 encodes a bifunctional protein that contains two domains\; an N-terminal ubiquitin peptide, and a C-terminal large ribosomal subunit protein L40 peptide.	Predicted to enable protein tag and ubiquitin protein ligase binding activity. Predicted to be a structural constituent of ribosome. Involved in polarity specification of anterior\/posterior axis. Predicted to be located in cytoplasm and nucleus. Predicted to be part of cytosolic small ribosomal subunit. Expressed in several structures, including hermaphrodite gonad\; intestine\; pharyngeal-intes…	Enriched in cephalic sheath cell, AFD, ASER, PLM, germ line, somatic gonad precursor, excretory cell, M cell, ADA, hermaphrodite distal tip cell, male distal tip cell, I4 neuron, m2R, m2L, MCR, MCL, NSM, RIG, anterior spermatheca, Posterior spermatheca and neuron according to tiling array, RNA-seq, single-cell RNA-seq and microarray. Affected by aak-2, daf-12, K10D11.2, tatn-1, ZK1236.1, jmjd-1.2…	WBPaper00002284|pmid7556908, WBPaper00004403|pmid11099034, WBPaper00005095|pmid11832245, WBPaper00006435|pmid14993261, WBPaper00014731|pmid N.A., WBPaper00027315|pmid18050424, WBPaper00028290|pmid10960098, WBPaper00038491|pmid21647448, WBPaper00046720|pmid25913452, WBPaper00055090|pmid30120140, WBPaper00061750|pmid34321666
chrI	14759936	14760546	611	1	173342	NM_061170	WBGene00004495	rps-26	40S ribosomal protein S26	WBGene00004495	rps-26	Caenorhabditis elegans	protein_coding_gene	F39B2.6	CELE_F39B2.6	F39B2.6.1	N.A.	CE16012	CE16012|HMMPANTHER:PTHR12538|SCANPROSITE:PS00733|PFAM:PF01283|INTERPRO:IPR000892|INTERPRO:IPR038551	O45499	O45499	TF300234	NM_001383766.2	NP_001370049.1	I 26.77 +/- 0.03	WBPaper00038381:F39B2_1_1, mv_F39B2.6, cenix:74-g9, sjj_F39B2.6|I-7G18	apoptosis fails to occur, apoptosis reduced, avoids bacterial lawn, cell membrane organization biogenesis variant, diplotene absent during oogenesis, dumpy, early larval arrest, embryonic lethal, embryonic terminal arrest variable emb, extended life span, germ cell compartment expansion absent, germ cell compartment expansion variant, germ cell compartment morphology variant, gonad small, gonad v…	N.A.	gk129940|Substitution|Missense, gk129941|Substitution|Missense, gk129943|Substitution|Missense, gk888888|Substitution|Missense	ani-1|Physical, cep-1|Genetic, cey-4|Physical, csr-1|Physical, glh-1|Physical, hsp-60|Regulatory, hsp-6|Regulatory, icd-1|Physical, myrf-1|Physical, nrde-2|Physical, pan-1|Physical, pid-3|Physical, prg-1|Physical, sec-6|Physical, smo-1|Physical, spc-1|Physical, tofu-6|Physical	N.A.	ADA, ADE, anterior gonadal sheath cell, anterior spermatheca, excretory gland cell, germ line, hermaphrodite distal tip cell, I4 neuron, intestine, M cell, m2L, m2R, male distal tip cell, MCL, MCR, MI neuron, NSM, posterior gonadal sheath cell, Posterior spermatheca, RIG, RIH, somatic gonad precursor, URB, URX	N.A.	1-day post-L4 adult hermaphrodite Ce, 10-days post-L4 adult hermaphrodite Ce, 11-15 days post-L4 adult hermaphrodite Ce, 2-days post-L4 adult hermaphrodite Ce, 20-days post-L4 adult hermaphrodite Ce, 24-cell embryo Ce, 3-days post-L4 adult hermaphrodite Ce, 3-fold embryo Ce, 5-days post-L4 adult hermaphrodite Ce, 6-days post-L4 adult hermaphrodite Ce, 7-10 days post-L4 adult hermaphrodite Ce, 7-d…	Diamond-Blackfan anemia 10|By Orthology	HGNC:10414|EnsEMBL-Compara;Hieranoid;Panther;OrthoFinder;SonicParanoid;PhylomeDB;Inparanoid;OMA;OrthoInspector, HGNC:31817|Hieranoid;Panther;OrthoFinder;SonicParanoid;PhylomeDB;Inparanoid;OMA;OrthoInspector	cytoplasm, cytoplasmic side of rough endoplasmic reticulum membrane, cytoplasmic translation, cytosol, cytosolic small ribosomal subunit, determination of adult lifespan, endoplasmic reticulum, mRNA binding, polysomal ribosome, ribonucleoprotein complex, ribosome, rough endoplasmic reticulum, structural constituent of ribosome, translation	rps-26 encodes a small ribosomal subunit S26 protein\; by homology, RPS-26 is predicted to function in protein biosynthesis\; in C. elegans, RPS-26 activity is required for embryonic, larval, and germline development, as well as normal locomotion and body morphology.	Predicted to enable mRNA binding activity. Predicted to be a structural constituent of ribosome. Involved in determination of adult lifespan. Predicted to be located in cytoplasmic side of rough endoplasmic reticulum membrane. Predicted to be part of cytosolic small ribosomal subunit and polysomal ribosome. Human ortholog(s) of this gene implicated in Diamond-Blackfan anemia 10. Is an ortholog of…	Enriched in germ line, somatic gonad precursor, M cell, ADA, ADE, hermaphrodite distal tip cell, male distal tip cell, excretory gland cell, anterior gonadal sheath cell, posterior gonadal sheath cell, I4 neuron, m2R, m2L, MCR, MCL, MI neuron, NSM, RIG, RIH, anterior spermatheca, Posterior spermatheca, URB, URX and intestine according to RNA-seq, single-cell RNA-seq and microarray. Affected by cl…	WBPaper00006475|pmid14726532, WBPaper00006510|pmid15084750, WBPaper00028564|pmid17023606, WBPaper00029008|pmid17266679, WBPaper00035215|pmid19763173, WBPaper00038491|pmid21647448, WBPaper00049531|pmid27129311, WBPaper00049828|pmid27405932, WBPaper00055090|pmid30120140
chrII	8602793	8603286	494	1	174379	NM_063423	WBGene00004440	rpl-26	60S ribosomal protein L26	WBGene00004440	rpl-26	Caenorhabditis elegans	protein_coding_gene	F28C6.7	CELE_F28C6.7	F28C6.7a.1, F28C6.7b.1, F28C6.7b.2, F28C6.7c.1	CEOP2372	CE03278, CE20731, CE32883	CE03278|PhosphoPep:F28C6.7a|HMMPANTHER:PTHR11143:SF10|HMMPANTHER:PTHR11143|SCANPROSITE:PS01108|SMART:SM00739|TIGRFAM:TIGR01080|PFAM:PF00467|PFAM:PF16906|SUPERFAMILY:SSF50104|INTERPRO:IPR005756|INTERPRO:IPR005824|INTERPRO:IPR008991|INTERPRO:IPR014722, CE20731|PhosphoPep:F28C6.7b|HMMPANTHER:PTHR11143:SF10|HMMPANTHER:PTHR11143|SCANPROSITE:PS01108|SMART:SM00739|TIGRFAM:TIGR01080|PFAM:PF00467|PFAM:PF1…	Q19869	Q19869	TF300236	NM_182165.8, NM_001381531.3, NM_063422.8	NP_495823.1, NP_001366756.1, NP_871965.1	II 0.83 +/- 0.00	mv_F28C6.7b, mv_F28C6.7a, cenix:210-d11, cenix:210-e11, WBPaper00038381:F28C6_1_1, sjj_F28C6.7a|II-6C16	apoptosis fails to occur, apoptosis reduced, diplotene absent during oogenesis, embryonic arrest, embryonic lethal, germ cell compartment expansion absent, germ cell compartment expansion variant, gonad small, gonad vesiculated, larval arrest, lysosome-related organelle morphology variant, maternal sterile, no oocytes, nuclei small, oocyte number decreased, pachytene progression during oogenesis …	N.A.	gk630992|Substitution|Missense, gk860979|Substitution|Missense, h16126|Substitution|Missense	csr-1|Physical, elks-1|Physical, erh-2|Physical, glh-1|Physical, hda-1|Physical, hsp-6|Regulatory, icd-1|Physical, lin-53|Physical, myrf-1|Physical, myrf-2|Physical, ned-8|Physical, nrde-2|Physical, pan-1|Physical, pid-3|Physical, pqn-59|Physical, prg-1|Physical, rde-10|Physical, sart-3|Physical, sec-6|Physical, smo-1|Physical, spc-1|Physical, tofu-6|Physical, tost-1|Physical, ulp-3|Physical, usi…	N.A.	AFD, anterior spermatheca, ASER, CAN, excretory gland cell, germ line, hermaphrodite distal tip cell, I4 neuron, M cell, m2L, m2R, male distal tip cell, muscle cell, NSM, PLM, Posterior spermatheca, RIG, RIH, somatic gonad precursor, URB	N.A.	1-day post-L4 adult hermaphrodite Ce, 10-days post-L4 adult hermaphrodite Ce, 11-15 days post-L4 adult hermaphrodite Ce, 14-days post-L4 adult hermaphrodite Ce, 15-days post-L4 adult hermaphrodite Ce, 16-18 days post-L4 adult hermaphrodite Ce, 2-days post-L4 adult hermaphrodite Ce, 20-days post-L4 adult hermaphrodite Ce, 3-days post-L4 adult hermaphrodite Ce, 3-fold embryo Ce, 6-days post-L4 adul…	Diamond-Blackfan anemia 11|By Orthology	HGNC:10327|EnsEMBL-Compara;Hieranoid;Panther;SonicParanoid;PhylomeDB;Inparanoid;OMA;OrthoInspector, HGNC:17050|EnsEMBL-Compara;Hieranoid;Panther;SonicParanoid;PhylomeDB;Inparanoid;OMA;OrthoInspector	cytoplasmic translation, cytosolic large ribosomal subunit, large ribosomal subunit, ribonucleoprotein complex, ribosomal large subunit biogenesis, ribosome, RNA binding, structural constituent of ribosome, translation	rpl-26 encodes a large ribosomal subunit L26 protein\; by homology, RPL-26 is predicted to function in protein biosynthesis\; in C. elegans, RPL-26 activity is required for embryonic and germline development and normal rates of postembryonic growth.	Predicted to enable RNA binding activity. Predicted to be a structural constituent of ribosome. Predicted to be involved in cytoplasmic translation and ribosomal large subunit biogenesis. Predicted to be located in ribosome. Predicted to be part of cytosolic large ribosomal subunit. Human ortholog(s) of this gene implicated in Diamond-Blackfan anemia 11. Is an ortholog of human RPL26 (ribosomal p…	Enriched in AFD, ASER, PLM, germ line, somatic gonad precursor, M cell, CAN, hermaphrodite distal tip cell, male distal tip cell, excretory gland cell, I4 neuron, m2R, m2L, NSM, RIG, RIH, anterior spermatheca, Posterior spermatheca, URB and muscle cell according to RNA-seq, single-cell RNA-seq and microarray. Affected by tax-6, cyc-1, aak-2, atx-3, daf-2, daf-16, let-7, gld-1, tdp-1, lin-35, cox-…	WBPaper00038491|pmid21647448, WBPaper00042599|pmid N.A., WBPaper00049828|pmid27405932, WBPaper00055090|pmid30120140
chrIII	5679330	5680148	819	1	175786	NM_065820	WBGene00004481	rps-12	40S ribosomal protein S12	WBGene00004481	rps-12	Caenorhabditis elegans	protein_coding_gene	F54E7.2	CELE_F54E7.2	F54E7.2.1, F54E7.2.2, F54E7.2.3, F54E7.2.4	CEOP3316	CE26896	CE26896|PhosphoPep:F54E7.2|HMMPANTHER:PTHR11843|HMMPANTHER:PTHR11843:SF0|PRINTS:PR00972|SCANPROSITE:PS01189|PFAM:PF01248|SUPERFAMILY:SSF55315|INTERPRO:IPR000530|INTERPRO:IPR004038|INTERPRO:IPR029064	P49196	P49196	TF300196	NM_065820.8	NP_498221.1	III -1.46 +/- 0.00	mv_F54E7.2, sjj_F54E7.2|III-2P24, TH:309h4, cenix:309-h4	avoids bacterial lawn, cytoplasmic processing body variant, diplotene region organization variant, dumpy, early larval arrest, embryonic lethal, extended life span, germ cell compartment expansion variant, germline nuclear positioning variant, gonad morphology variant, gonad vesiculated, larval arrest, larval lethal, maternal sterile, mRNA surveillance defective, nonsense mRNA accumulation, nucle…	N.A.	gk175190|Substitution|Missense, gk419498|Substitution|Missense, gk589868|Substitution|Missense, gk722129|Substitution|Missense, h10902|Substitution|Missense	bar-1|Genetic, ced-3|Physical, cey-4|Physical, csr-1|Physical, dcr-1|Physical, egl-15|Genetic, erh-2|Physical, glh-1|Physical, icd-1|Physical, let-756|Genetic, myrf-1|Physical, myrf-2|Physical, nmad-1|Physical, nrde-2|Physical, pan-1|Physical, pid-2|Physical, pid-3|Physical, pqn-59|Physical, prg-1|Physical, sec-6|Physical, smo-1|Physical, spc-1|Physical, tofu-6|Physical, wago-1|Physical	N.A.	ADA, ADE, anterior gonadal sheath cell, anterior spermatheca, CAN, excretory cell, excretory gland cell, germ line, hermaphrodite distal tip cell, intestine, M cell, male distal tip cell, neuron, NSM, posterior gonadal sheath cell, Posterior spermatheca, Psub1, RID, RIG, RIH, RMG, somatic gonad precursor, URB, URX	N.A.	1-day post-L4 adult hermaphrodite Ce, 10-days post-L4 adult hermaphrodite Ce, 11-15 days post-L4 adult hermaphrodite Ce, 14-days post-L4 adult hermaphrodite Ce, 15-days post-L4 adult hermaphrodite Ce, 16-18 days post-L4 adult hermaphrodite Ce, 2-cell embryo Ce, 2-days post-L4 adult hermaphrodite Ce, 20-days post-L4 adult hermaphrodite Ce, 24-cell embryo Ce, 3-days post-L4 adult hermaphrodite Ce, …	N.A.	HGNC:10385|EnsEMBL-Compara;Hieranoid;Panther;OrthoFinder;SonicParanoid;PhylomeDB;Inparanoid;OMA;OrthoInspector	cytosolic small ribosomal subunit, ribonucleoprotein complex, ribosome, structural constituent of ribosome, translation	rps-12 encodes a small ribosomal subunit S12 protein\; by homology, RPS-12 is predicted to function in protein biosynthesis\; in C. elegans, RPS-12 activity is required for embryonic and germline development, normal movement, and the overall health of the animal.	Predicted to be a structural constituent of ribosome. Predicted to be involved in translation. Predicted to be located in ribosome. Predicted to be part of cytosolic small ribosomal subunit. Is an ortholog of human RPS12 (ribosomal protein S12).	Enriched in NSM, Psub1, germ line, somatic gonad precursor, excretory cell, M cell, ADA, ADE, CAN, hermaphrodite distal tip cell, male distal tip cell, excretory gland cell, anterior gonadal sheath cell, posterior gonadal sheath cell, RID, RIG, RIH, RMG, anterior spermatheca, Posterior spermatheca, URB, URX, intestine and neuron according to RNA-seq, proteomic study, single-cell RNA-seq and micro…	WBPaper00024230|pmid15194189, WBPaper00028564|pmid17023606, WBPaper00029197|pmid17371877, WBPaper00038356|pmid21525958, WBPaper00038491|pmid21647448, WBPaper00049828|pmid27405932, WBPaper00055090|pmid30120140
chrIV	2927711	2928418	708	2	177074	NM_067872	WBGene00021888	manf-1	Mesencephalic astrocyte-derived neurotrophic factor homolog	WBGene00021888	manf-1	Caenorhabditis elegans	protein_coding_gene	Y54G2A.23	Y54G2A.o, Y54G2A.o, CELE_Y54G2A.23	Y54G2A.23.1	CEOP4072	CE30049	CE30049|HMMPANTHER:PTHR12990|HMMPANTHER:PTHR12990:SF5|PFAM:PF20145|PFAM:PF10208|SUPERFAMILY:SSF68906|INTERPRO:IPR019345|INTERPRO:IPR036361|INTERPRO:IPR045332|INTERPRO:IPR045333	Q9N3B0	Q9N3B0	TF314252	NM_067872.9	NP_500273.2	IV -6.69	cenix:232-e12, sjj2_Y54G2A.23.1|IV-9J23	N.A.	ER stress response variant, neuron degeneration enhanced, protein aggregation variant, slow growth, unfolded protein response variant	gk196988|Substitution|Missense, gk480966|Substitution|Missense, gk712256|Substitution|Missense, gk717957|Substitution|Missense, gk820602|Substitution|Missense, gk838799|Substitution|Missense, gk847180|Substitution|Missense, gk902095|Substitution|Missense	N.A.	anus, body wall musculature, Cell, excretory gland cell, hypodermis, intestine, nervous system, pharyngeal muscle cell, pharynx, rectal valve cell, somatic cell, spermatheca, vulval muscle	anterior spermatheca, ASER, germ line, Posterior spermatheca	adult Ce, all stages Ce, embryo Ce, L1 larva Ce, L4 larva Ce, larva Ce	1-day post-L4 adult hermaphrodite Ce, 10-days post-L4 adult hermaphrodite Ce, 20-days post-L4 adult hermaphrodite Ce, 4-cell embryo Ce, 4-days post-L4 adult hermaphrodite Ce, 6-days post-L4 adult hermaphrodite Ce, adult Ce, adult hermaphrodite Ce, adult male Ce, all stages Ce, blastula embryo Ce, dauer larva Ce, embryo Ce, L1 larva Ce, L2 larva Ce, L2d larva Ce, L3 larva Ce, L4 larva Ce	breast cancer|By Orthology, squamous cell carcinoma|By Orthology, pancreatic cancer|By Orthology, lung non-small cell carcinoma|By Orthology, renal cell carcinoma|By Orthology, Parkinsonism|By Orthology	HGNC:15461|EnsEMBL-Compara;Hieranoid;Panther;OrthoFinder;SonicParanoid;PhylomeDB;Inparanoid;OrthoInspector, HGNC:24913|EnsEMBL-Compara;Hieranoid;Panther;OrthoFinder;SonicParanoid;PhylomeDB;Inparanoid;OMA;OrthoInspector	ATF6-mediated unfolded protein response, developmental growth, dopaminergic neuron differentiation, endoplasmic reticulum lumen, endoplasmic reticulum, extracellular region, extracellular space, lipid binding, negative regulation of neuron death, neuron projection development, regulation of response to endoplasmic reticulum stress, sulfatide binding	Y54G2A.23 is orthologous to the human genes CDNF (Conserved Dopamine Neurotrophic Factor), also known as ARMETL1 (Arginine-Rich Protein Mutated In Early Stage Tumors-Like 1) and MANF (Mesencephalic Astrocyte-derived Neurotrophic Factor)\; CDNF is involved in the survival and function of dopaminergic neurons.	Enables sulfatide binding activity. Involved in developmental growth\; negative regulation of neuron death\; and regulation of response to endoplasmic reticulum stress. Predicted to be located in endoplasmic reticulum and extracellular space. Expressed in several structures, including anus\; excretory gland cell\; pharynx\; rectal valve cell\; and somatic cell. Human ortholog(s) of this gene impl…	Enriched in ASER, germ line, anterior spermatheca and Posterior spermatheca according to RNA-seq and single-cell RNA-seq. Affected by aak-2, let-7, gld-1, gld-2, clk-1, npr-1, hsf-1, set-25, met-2, lin-28, mir-34, emb-4, sma-2, sma-4, elt-2, elt-7, daf-2, isp-1, nuo-6, spc-1, unc-70, iff-1, cfp-1, set-2, sin-3, mrps-5, set-6, baz-2, cox-5B, hlh-11 and unc-30 according to RNA-seq, proteomic study …	WBPaper00038491|pmid21647448, WBPaper00053758|pmid29497057, WBPaper00055090|pmid30120140, WBPaper00055101|pmid30147641, WBPaper00056823|pmid31138438, WBPaper00059347|pmid32095531, WBPaper00060970|pmid33524011
chrIII	11919189	11920220	1032	2	176625	NM_067152	WBGene00000369	ccf-1	CCR4-NOT transcription complex subunit 7	WBGene00000369	ccf-1	Caenorhabditis elegans	protein_coding_gene	Y56A3A.20	CELE_Y56A3A.20	Y56A3A.20.1	CEOP3740	CE22588	CE22588|HMMPANTHER:PTHR10797|HMMPANTHER:PTHR10797:SF0|PFAM:PF04857|SUPERFAMILY:SSF53098|INTERPRO:IPR006941|INTERPRO:IPR012337|INTERPRO:IPR036397|INTERPRO:IPR039637|Metal_ion_binding_site	Q17345	Q17345	TF314185	NM_067152.7	NP_499553.1	III 13.47 +/- 0.02	cenix:341-c12, TH:332d1, mv_Y56A3A.20, mv_AAA87454, TH:332F3, cenix:178-a6, TH:341c12, sjj_Y56A3A.20|III-6K17, cenix:332-f3, cenix:332-d1	apoptosis reduced, cell membrane organization biogenesis variant, chromosome condensation variant, diplotene progression during oogenesis variant, dumpy, embryo osmotic integrity defective early emb, embryonic development variant, embryonic lethal, embryonic morphology variant, germ cell compartment anucleate, germ cell compartment morphology variant, germ cell compartment size variant, germline …	N.A.	gk187199|Substitution|Missense, gk187200|Substitution|Missense, gk187201|Substitution|Missense, gk187202|Substitution|Missense, gk430672|Substitution|Missense, gk528778|Substitution|Missense, gk536278|Substitution|Missense, gk680965|Substitution|Missense, gk824295|Substitution|Missense	ain-1|Physical, ccr-4|Physical, enri-1|Physical, fbf-1|Physical, fbf-2|Physical, gld-1|Regulatory, hda-1|Physical, let-711|Physical, lin-41|Physical, mbk-2|Physical, meg-2|Physical, par-2|Physical, puf-8|Physical, smo-1|Physical, zen-4|Physical	germ line	AFD, AVK, germ line, intestine, neuron, NSM, OLL, PVD	adult Ce, embryo Ce, L1 larva Ce, L2 larva Ce, L3 larva Ce, L4 larva Ce	1-cell embryo Ce, 1-day post-L4 adult hermaphrodite Ce, 10-days post-L4 adult hermaphrodite Ce, 2-days post-L4 adult hermaphrodite Ce, 20-days post-L4 adult hermaphrodite Ce, 6-days post-L4 adult hermaphrodite Ce, 7-10 days post-L4 adult hermaphrodite Ce, adult Ce, adult hermaphrodite Ce, adult male Ce, all stages Ce, blastula embryo Ce, dauer larva Ce, embryo Ce, L1 larva Ce, L2 larva Ce, L3 lar…	N.A.	HGNC:9207|Hieranoid;Panther;OrthoFinder;SonicParanoid;Inparanoid;OMA;OrthoInspector, HGNC:14101|EnsEMBL-Compara;Hieranoid;Panther;OrthoFinder;SonicParanoid;PhylomeDB;Inparanoid;OMA;OrthoInspector	CCR4-NOT complex, CCR4-NOT core complex, cytoplasm, exonuclease activity, exonucleolytic catabolism of deadenylated mRNA, gene silencing by RNA, hydrolase activity, metal ion binding, mRNA catabolic process, nuclear-transcribed mRNA poly(A) tail shortening, nuclease activity, nucleic acid binding, nucleic acid phosphodiester bond hydrolysis, nucleus, oogenesis, P granule, P-body, poly(A)-specific…	N.A.	Predicted to enable poly(A)-specific ribonuclease activity. Involved in nuclear-transcribed mRNA poly(A) tail shortening and oogenesis. Located in P granule and P-body. Part of CCR4-NOT complex. Expressed in germ line. Is an ortholog of human CNOT7 (CCR4-NOT transcription complex subunit 7).	Enriched in PVD, OLL, NSM, AFD, germ line, AVK, intestine and neuron according to microarray and RNA-seq. Affected by aak-2, let-7, gld-1, lem-2, emr-1, csr-1, gld-2, rsks-1, npr-1, glh-4, glh-1, pgl-1, pgl-3, lin-41, emb-4, sma-2, sma-4, nhl-2, iff-1, meg-3, mrps-5, set-6, baz-2, hlh-11, unc-30, smo-1, hda-1, sir-2.1, slr-2, fbf-1, mir-243 and tdp-1 according to RNA-seq, proteomic study and micr…	WBPaper00018722|pmid N.A., WBPaper00026675|pmid16039072, WBPaper00026846|pmid16207815, WBPaper00032091|pmid18692039, WBPaper00032912|pmid19221201, WBPaper00038491|pmid21647448, WBPaper00043886|pmid23843623, WBPaper00049531|pmid27129311, WBPaper00052136|pmid N.A., WBPaper00055090|pmid30120140, WBPaper00055505|pmid16715093, WBPaper00058597|pmid31511882, WBPaper00062824|pmid N.A.
chrIII	4753050	4754046	997	2	175628	NM_065577	WBGene00004469	rps-0	40S ribosomal protein SA	WBGene00004469	rps-0	Caenorhabditis elegans	protein_coding_gene	B0393.1	CELE_B0393.1	B0393.1.1	CEOP3897	CE00854	CE00854|HMMPANTHER:PTHR11489|HMMPANTHER:PTHR11489:SF9|PRINTS:PR00395|SCANPROSITE:PS00963|SCANPROSITE:PS00962|TIGRFAM:TIGR01012|PFAM:PF00318|SUPERFAMILY:SSF52313|INTERPRO:IPR001865|INTERPRO:IPR005707|INTERPRO:IPR023591	P46769	P46769	TF300100	NM_065577.9	NP_497978.1	III -2.59 +/- 0.00	mv_G_YK1628, cenix:300-b9, TH:340a12, sjj_B0393.1|III-2M04, cenix:173-c2, cenix:340-a12, smd_B0393.1:2, TH:300b9	apoptosis reduced, avoids bacterial lawn, diplotene absent during oogenesis, diplotene region organization variant, early larval arrest, embryonic lethal, extended life span, germ cell compartment expansion variant, germ cell compartment morphology variant, germ cell compartment multinucleate, germ cell compartment size variant, germ cell partition morphology variant, germline nuclear positioning…	N.A.	tm4750|Deletion|Frameshift, gk173369|Substitution|Missense, gk173370|Substitution|Missense, gk173371|Substitution|Missense, gk312568|Substitution|Missense, gk371467|Substitution|Missense, gk877544|Substitution|Missense, gk893988|Substitution|Missense, gk904974|Substitution|Missense	actl-1|Physical, ain-2|Physical, atp-2|Physical, bar-1|Genetic, cacn-1|Physical, calm-1|Physical, csr-1|Physical, daf-16|Regulatory, daf-2|Genetic, glh-1|Physical, hcp-3|Physical, icd-1|Physical, kin-4|Physical, M01E5.3|Physical, mars-1|Physical, myrf-1|Physical, myrf-2|Physical, nrde-2|Physical, pan-1|Physical, pid-3|Physical, pqn-59|Physical, prg-1|Physical, rde-8|Physical, rps-21|Physical, sip…	anal depressor muscle, body wall musculature, hypodermis, intestine, mu_int_L, mu_int_R, nervous system, pharynx, tail, tail neuron	anterior spermatheca, body wall musculature, CAN, dorsal nerve cord, excretory gland cell, germ line, hermaphrodite distal tip cell, I4 neuron, lateral nerve cord, M cell, m2L, m2R, male distal tip cell, MCL, MCR, nerve ring, neuron, pharynx, Posterior spermatheca, RIG, somatic gonad precursor, somatic neuron, tail neuron, ventral nerve cord, vulval muscle	adult Ce, larva Ce	1-cell embryo Ce, 1-day post-L4 adult hermaphrodite Ce, 10-days post-L4 adult hermaphrodite Ce, 11-15 days post-L4 adult hermaphrodite Ce, 16-18 days post-L4 adult hermaphrodite Ce, 2-days post-L4 adult hermaphrodite Ce, 20-days post-L4 adult hermaphrodite Ce, 3-days post-L4 adult hermaphrodite Ce, 3-fold embryo Ce, 5-days post-L4 adult hermaphrodite Ce, 6-days post-L4 adult hermaphrodite Ce, adu…	N.A.	HGNC:6502|EnsEMBL-Compara;Hieranoid;Panther;OrthoFinder;SonicParanoid;PhylomeDB;Inparanoid;OMA;OrthoInspector	cytoplasm, cytoplasmic translation, cytosolic small ribosomal subunit, protein binding, ribonucleoprotein complex, ribosomal small subunit assembly, ribosome, small ribosomal subunit, structural constituent of ribosome, translation	rps-0 encodes a small ribosomal subunit SA protein that appears to function as both a ribosomal component and a laminin receptor\; by homology, RPS-0 is predicted to play roles in protein biosynthesis and cell adhesion\; in C. elegans, RPS-0 activity is required for embryonic and germline development, vulval morphogenesis, and the overall health of the animal.	Predicted to be a structural constituent of ribosome. Predicted to be involved in cytoplasmic translation and ribosomal small subunit assembly. Predicted to be located in cytoplasm and ribosome. Predicted to be part of cytosolic small ribosomal subunit. Expressed in tail. Is an ortholog of human RPSA (ribosomal protein SA).	Enriched in ventral nerve cord, body wall musculature, vulval muscle, nerve ring, dorsal nerve cord, somatic neuron, tail neuron, lateral nerve cord, pharynx, germ line, somatic gonad precursor, M cell, CAN, hermaphrodite distal tip cell, male distal tip cell, excretory gland cell, I4 neuron, m2R, m2L, MCR, MCL, RIG, anterior spermatheca, Posterior spermatheca and neuron according to Chronogram a…	WBPaper00013628|pmid9718729, WBPaper00025088|pmid15837805, WBPaper00026640|pmid15996007, WBPaper00035228|pmid19805813, WBPaper00038491|pmid21647448, WBPaper00038848|pmid N.A., WBPaper00039068|pmid N.A., WBPaper00049828|pmid27405932, WBPaper00055090|pmid30120140
chrIV	11110216	11111044	829	2	178012	NM_069676	WBGene00004474	rps-5	40S ribosomal protein S5	WBGene00004474	rps-5	Caenorhabditis elegans	protein_coding_gene	T05E11.1	CELE_T05E11.1	T05E11.1.1	CEOP4408	CE06360	CE06360|HMMPANTHER:PTHR11205:SF34|HMMPANTHER:PTHR11205|PIRSF:PIRSF002122|SCANPROSITE:PS00052|TIGRFAM:TIGR01028|PFAM:PF00177|SUPERFAMILY:SSF47973|INTERPRO:IPR000235|INTERPRO:IPR005716|INTERPRO:IPR023798|INTERPRO:IPR036823	P49041	P49041	TF300872	NM_069676.6	NP_502077.1	IV 4.88 +/- 0.00	WBPaper00038381:T05E11_1_1, mv_T05E11.1, smd_9T05E11.1, sjj_T05E11.1|IV-5L14, cenix:100-f10	apoptosis fails to occur, apoptosis reduced, avoids bacterial lawn, cell membrane organization biogenesis variant, chromosome condensation variant, cytoplasmic processing body variant, diplotene absent during oogenesis, early larval arrest, embryonic lethal, extended life span, germ cell compartment expansion absent, germ cell compartment expansion variant, germ cell compartment morphology varian…	N.A.	gk212078|Substitution|Missense, gk327578|Substitution|Missense, gk489282|Substitution|Missense, gk933844|Substitution|Missense, gk938565|Substitution|Missense	alg-1|Physical, ced-3|Physical, cep-1|Genetic, csr-1|Physical, dep-1|Physical, glh-1|Physical, hcp-3|Physical, hmg-3|Physical, hsp-16.2|Physical, lec-1|Physical, mafr-1|Physical, mars-1|Physical, met-2|Physical, myrf-1|Physical, myrf-2|Physical, nrde-2|Physical, pan-1|Physical, pid-3|Physical, pqn-54|Physical, prg-1|Physical, rde-8|Physical, rps-25|Physical, sip-1|Physical, smo-1|Physical, spc-1|…	N.A.	anal depressor muscle, anterior gonadal sheath cell, anterior spermatheca, body wall musculature, CAN, dopaminergic neuron, excretory cell, excretory gland cell, germ line, hermaphrodite distal tip cell, hypodermis, I4 neuron, intestine, M cell, m2L, m2R, male distal tip cell, MCL, MCR, MI neuron, NSM, OLL, pharynx, posterior gonadal sheath cell, Posterior spermatheca, PVD, RIG, RIH, somatic gona…	N.A.	1-cell embryo Ce, 1-day post-L4 adult hermaphrodite Ce, 10-days post-L4 adult hermaphrodite Ce, 11-15 days post-L4 adult hermaphrodite Ce, 14-days post-L4 adult hermaphrodite Ce, 15-days post-L4 adult hermaphrodite Ce, 16-18 days post-L4 adult hermaphrodite Ce, 2-days post-L4 adult hermaphrodite Ce, 20-days post-L4 adult hermaphrodite Ce, 24-cell embryo Ce, 3-days post-L4 adult hermaphrodite Ce, …	N.A.	HGNC:10426|EnsEMBL-Compara;Hieranoid;Panther;OrthoFinder;SonicParanoid;PhylomeDB;Inparanoid;OMA;OrthoInspector	cytosolic small ribosomal subunit, mRNA binding, ribonucleoprotein complex, ribosomal small subunit assembly, ribosome, rRNA binding, small ribosomal subunit, structural constituent of ribosome, translation	rps-5 encodes a small ribosomal subunit S5 protein.	Predicted to enable mRNA binding activity and rRNA binding activity. Predicted to be a structural constituent of ribosome. Predicted to be involved in ribosomal small subunit assembly and translation. Predicted to be located in ribosome. Predicted to be part of cytosolic small ribosomal subunit. Is an ortholog of human RPS5 (ribosomal protein S5).	Enriched in body wall musculature, vulval muscle, intestine, pharynx, anal depressor muscle, dopaminergic neuron, hypodermis, PVD, OLL, germ line, somatic gonad precursor, excretory cell, M cell, CAN, hermaphrodite distal tip cell, male distal tip cell, excretory gland cell, anterior gonadal sheath cell, posterior gonadal sheath cell, I4 neuron, m2R, m2L, MCR, MCL, MI neuron, NSM, RIG, RIH, anter…	WBPaper00003822|pmid10580003, WBPaper00003858|pmid10611325, WBPaper00004890|pmid11566890, WBPaper00005411|pmid12183367, WBPaper00005725|pmid12458202, WBPaper00006475|pmid14726532, WBPaper00035215|pmid19763173, WBPaper00035228|pmid19805813, WBPaper00038491|pmid21647448, WBPaper00049828|pmid27405932, WBPaper00055090|pmid30120140
chrI	12964814	12966263	1450	2	173167	NM_001025879	WBGene00006529	tba-2	Tubulin alpha-2 chain	WBGene00006529	tba-2	Caenorhabditis elegans	protein_coding_gene	C47B2.3	Alpha-tubulin, TUBA4B, mel-45, CELE_C47B2.3	C47B2.3.1, C47B2.3.2	CEOP1680	CE17563	CE17563|HMMPANTHER:PTHR11588|HMMPANTHER:PTHR11588:SF182|PRINTS:PR01162|PRINTS:PR01161|SCANPROSITE:PS00227|SMART:SM00864|SMART:SM00865|PFAM:PF03953|PFAM:PF00091|SUPERFAMILY:SSF52490|SUPERFAMILY:SSF55307|INTERPRO:IPR000217|INTERPRO:IPR002452|INTERPRO:IPR003008|INTERPRO:IPR008280|INTERPRO:IPR018316|INTERPRO:IPR023123|INTERPRO:IPR036525|INTERPRO:IPR037103	P34690	P34690	N.A.	NM_001025879.7	NP_001021050.1	I 16.78 +/- 0.10	mv_BAA03610, cenix:182-c8, sjj_C47B2.3|I-6H17	avoids bacterial lawn, centriole biogenesis variant, cytokinesis variant emb, decreased recruitment of actin upon wounding, distal tip cell migration variant, embryonic lethal, exploded through vulva, germ cell development variant, gonad arm morphology variant, gonad development variant, larval arrest, larval lethal, lethal, linker cell detached, linker cell migration variant, lysosome-related or…	lethal	tm6995|Deletion|Frameshift, gk126091|Substitution|Missense, gk126092|Substitution|Missense, gk684748|Substitution|Missense, gk768447|Substitution|Missense, gk799056|Substitution|Missense, gk839284|Substitution|Missense, sb116|Substitution|Missense, sb117|Substitution|Missense, sb25|Substitution|Missense, sb27|Substitution|Missense, sb51|Substitution|Missense	akir-1|Physical, ced-3|Physical, col-19|Regulatory, csr-1|Physical, dlg-1|Physical, glh-1|Physical, lnkn-1|Regulatory, M05D6.2|Physical, mafr-1|Physical, mei-1|Genetic, mei-2|Genetic, mel-26|Genetic, myrf-1|Physical, myrf-2|Physical, nmad-1|Physical, pan-1|Physical, prg-1|Physical, sas-5|Regulatory, smo-1|Physical, spc-1|Physical, spe-39|Physical, tba-1|Genetic, tbb-2|Physical, tofu-6|Physical, v…	ALA, body wall musculature, Cell, head neuron, I1L, I1R, I2L, I2R, I3 neuron, intestine, neuron, pharyngeal muscle cell, pharynx, PLML, PLMR, PVT, tail neuron, touch receptor neuron, ventral cord neuron, ventral nerve cord	ABalpppppp, ABplaapaap, ABplapappp, ABplpappaa, ABpraaappp, ABpraapaap, ABprapappp, AVK, DA neuron, DA1, DA2, DA3, DA4, DA5, DA6, DA7, DA8, DA9, DB1, DB2, DB3, DB4, DB5, DB6, DB7, g1AL, g1AR, g1P, germ line, hermaphrodite distal tip cell, I4 neuron, I5 neuron, male distal tip cell, MCL, MCR, MSaaaaapa, muscle cell, neuron, NSM, PDE, pm3, pm4, pm5, pm7, PVC, PVP, retrovesicular ganglion, SAB, VA n…	adult Ce, embryo Ce, L1 larva Ce, L2 larva Ce, L3 larva Ce, L4 larva Ce	1-cell embryo Ce, 1-day post-L4 adult hermaphrodite Ce, 10-days post-L4 adult hermaphrodite Ce, 11-15 days post-L4 adult hermaphrodite Ce, 14-days post-L4 adult hermaphrodite Ce, 15-days post-L4 adult hermaphrodite Ce, 16-18 days post-L4 adult hermaphrodite Ce, 2-days post-L4 adult hermaphrodite Ce, 20-days post-L4 adult hermaphrodite Ce, 3-fold embryo Ce, 6-days post-L4 adult hermaphrodite Ce, a…	thrombocytopenia|By Orthology	HGNC:12410|OMA;EnsEMBL-Compara, HGNC:23534|EnsEMBL-Compara;Panther	centrosome localization, cytoplasm, cytoskeleton, embryo development ending in birth or egg hatching, establishment of mitotic spindle orientation, GTP binding, microtubule cytoskeleton organization, microtubule, microtubule-based process, mitotic cell cycle, nucleotide binding, protein localization, regulation of cytokinesis, structural constituent of cytoskeleton	tba-2 encodes an alpha-tubulin.	Predicted to enable GTP binding activity. Predicted to be a structural constituent of cytoskeleton. Involved in several processes, including centrosome localization\; establishment of mitotic spindle orientation\; and regulation of cytokinesis. Predicted to be located in cytoplasm and microtubule. Expressed in several structures, including body wall musculature\; intestine\; neurons\; pharynx\; a…	Enriched in NSM, germ line, AVK, ABplpappaa, g1P, g1AR, g1AL, ABpraaappp, ABalpppppp, ABpraapaap, ABplaapaap, MSaaaaapa, ABprapappp, ABplapappp, pm5, pm4, pm3, pm7, DA9, DA8, DA7, DA6, DA5, DA4, DA3, DA2, DA1, DB1, DB7, DB6, DB5, DB4, DB3, DB2, hermaphrodite distal tip cell, male distal tip cell, I4 neuron, MCR, MCL, PDE, PVC, PVP, VA12, VA11, VA10, VA9, VA8, VA7, VA6, VA5, VA4, VA3, VA2, VA1, VB…	WBPaper00002176|pmid7742369, WBPaper00002958|pmid9409829, WBPaper00003414|pmid9885292, WBPaper00004402|pmid11099033, WBPaper00006059|pmid12956950, WBPaper00006237|pmid12937270, WBPaper00006310|pmid14697201, WBPaper00010264|pmid N.A., WBPaper00010342|pmid N.A., WBPaper00010889|pmid N.A., WBPaper00013420|pmid15083533, WBPaper00015124|pmid N.A., WBPaper00015440|pmid N.A., WBPaper00015548|pmid N.A., …
chrV	19119402	19119455	54	1	13218415	NR_070211	WBGene00196812	Y39B6A.74	ncRNA	WBGene00196812	Y39B6A.74	Caenorhabditis elegans	ncRNA_gene	Y39B6A.74	CELE_Y39B6A.74	Y39B6A.74	N.A.	N.A.	N.A.	N.A.	N.A.	N.A.	NR_070211.1	N.A.	V 20.197861	N.A.	N.A.	N.A.	N.A.	N.A.	N.A.	N.A.	N.A.	N.A.	N.A.	N.A.	N.A.	N.A.	N.A.	N.A.	N.A.
chrIV	14033942	14034090	149	2	13200287	NR_058154	WBGene00199919	Y37A1B.335	ncRNA	WBGene00199919	Y37A1B.335	Caenorhabditis elegans	ncRNA_gene	Y37A1B.335	CELE_Y37A1B.335	Y37A1B.335	N.A.	N.A.	N.A.	N.A.	N.A.	N.A.	NR_058154.1	N.A.	IV 11.172740	N.A.	N.A.	N.A.	N.A.	N.A.	N.A.	AVK	N.A.	1-day post-L4 adult hermaphrodite Ce, L1 larva Ce	N.A.	N.A.	N.A.	N.A.	Enriched in AVK based on RNA-seq studies. Is affected by cep-1 based on RNA-seq studies.	Enriched in AVK according to RNA-seq. Affected by cep-1 according to RNA-seq.	N.A.
chrI	636936	637807	872	1	171654	NM_058361	WBGene00022027	vps-20	uncharacterized protein	WBGene00022027	vps-20	Caenorhabditis elegans	protein_coding_gene	Y65B4A.3	Y65B4A.d, Y65B4A.d, Y65B4A.h, Y65B4A.h, CELE_Y65B4A.3	Y65B4A.3.1	N.A.	CE22731	CE22731|HMMPANTHER:PTHR22761|HMMPANTHER:PTHR22761:SF5|PFAM:PF03357|INTERPRO:IPR005024	Q9BL60	Q9BL60	TF105929	NM_058361.7	NP_490762.1	I -18.65 +/- 0.06	sjj_Y65B4A_182.c|I-7P18, mv_Y65B4A.h, mv_Y65B4A.d, cenix:215-f6	aldicarb resistant, avoids bacterial lawn, Bacillus thuringiensis toxin hypersensitive, cell secretion variant, dumpy, larval arrest, larval lethal, locomotion variant, organism development variant, paralyzed, pattern of transgene expression variant, pore forming toxin hypersensitive, RAB-11 recycling endosome localization variant, RAB-11 recycling endosome morphology variant, shortened life span…	N.A.	gk101366|Substitution|Missense, gk101367|Substitution|Missense, gk871733|Substitution|Missense	bar-1|Genetic, daf-2|Genetic, did-2|Physical, egl-15|Genetic, istr-1|Physical, let-60|Genetic, let-756|Genetic, sem-5|Genetic, sma-6|Genetic, vps-22|Physical, vps-25|Physical, vps-60|Physical	N.A.	AFD, ASER, germ line, hypodermis, intestine, rect_D, rect_VL, rect_VR	N.A.	1-day post-L4 adult hermaphrodite Ce, 3-days post-L4 adult hermaphrodite Ce, 5-days post-L4 adult hermaphrodite Ce, adult Ce, adult hermaphrodite Ce, adult male Ce, all stages Ce, blastula embryo Ce, dauer larva Ce, embryo Ce, L1 larva Ce, L2 larva Ce, L3 larva Ce, L4 larva Ce, larva Ce	N.A.	HGNC:25675|EnsEMBL-Compara;Hieranoid;Panther;OrthoFinder;Inparanoid;OMA;OrthoInspector	ESCRT III complex, late endosome to vacuole transport via multivesicular body sorting pathway, multivesicular body, vacuolar transport, vesicle budding from membrane	N.A.	Predicted to be involved in late endosome to vacuole transport via multivesicular body sorting pathway and vesicle budding from membrane. Predicted to be located in multivesicular body. Predicted to be part of ESCRT III complex. Is an ortholog of human CHMP6 (charged multivesicular body protein 6).	Enriched in hypodermis, AFD, ASER, germ line, rect_VR, rect_VL, rect_D and intestine according to tiling array, RNA-seq, single-cell RNA-seq and microarray. Affected by lem-2, emr-1, daf-16, cox-5B, jmjd-3.1, jmjd-1.2, hlh-30, mir-34, emb-4, sma-4, mina-1, sin-3, set-6, baz-2, bcat-1, spr-1, sir-2.1, fbf-1, rnp-8, tdp-1 and lin-35 according to RNA-seq and microarray. Affected by rotenone, Cry5B, …	WBPaper00031212|pmid18006689, WBPaper00038491|pmid21647448, WBPaper00038585|pmid N.A., WBPaper00039823|pmid21688204, WBPaper00040674|pmid21835927, WBPaper00046327|pmid25588614, WBPaper00055090|pmid30120140, WBPaper00056973|pmid31250303
chrIII	4475947	4476814	868	1	175584	NM_065509	WBGene00004470	rps-1	40S ribosomal protein S3a	WBGene00004470	rps-1	Caenorhabditis elegans	protein_coding_gene	F56F3.5	CELE_F56F3.5	F56F3.5.1	N.A.	CE00664	CE00664|HMMPANTHER:PTHR11830|HMMPANTHER:PTHR11830:SF28|SCANPROSITE:PS01191|SMART:SM01397|PFAM:PF01015|INTERPRO:IPR001593	P48154	P48154	TF300037	NM_065509.9	NP_497910.1	III -3.16 +/- 0.00	mv_F56F3.5, TH:300g3, cenix:341-e11, cenix:300-g3	apoptosis fails to occur, apoptosis reduced, avoids bacterial lawn, dauer lifespan extended, diplotene absent during oogenesis, early larval arrest, embryonic lethal, germ cell compartment expansion absent, germ cell compartment expansion variant, gonad small, gonad vesiculated, larval arrest, lysosome-related organelle morphology variant, maternal sterile, molt defect, no oocytes, nuclei small, …	N.A.	gk172832|Substitution|Missense, gk172833|Substitution|Missense, gk172834|Substitution|Missense, gk172836|Substitution|Missense, gk172837|Substitution|Missense, gk328541|Substitution|Missense, gk570342|Substitution|Missense, gk707639|Substitution|Missense, gk742787|Substitution|Missense, h3333|Substitution|Missense	cacn-1|Physical, calm-1|Physical, cdc-48.2|Genetic, cep-1|Genetic, cey-4|Physical, cfp-1|Physical, csr-1|Physical, enri-2|Physical, erh-2|Physical, glh-1|Physical, hcp-3|Physical, hsp-16.2|Physical, icd-1|Physical, lec-1|Physical, mafr-1|Physical, myrf-1|Physical, myrf-2|Physical, nmad-1|Physical, nrde-2|Physical, pan-1|Physical, pid-3|Physical, pid-5|Physical, pqn-59|Physical, prg-1|Physical, se…	N.A.	ADA, anterior spermatheca, CAN, excretory cell, excretory gland cell, germ line, hermaphrodite distal tip cell, I4 neuron, intestine, M cell, M1 neuron, m2L, m2R, male distal tip cell, MI neuron, NSM, Posterior spermatheca, RIG, RIH, somatic gonad precursor, URB, URX	N.A.	1-day post-L4 adult hermaphrodite Ce, 10-days post-L4 adult hermaphrodite Ce, 11-15 days post-L4 adult hermaphrodite Ce, 14-days post-L4 adult hermaphrodite Ce, 15-days post-L4 adult hermaphrodite Ce, 16-18 days post-L4 adult hermaphrodite Ce, 2-days post-L4 adult hermaphrodite Ce, 20-days post-L4 adult hermaphrodite Ce, 3-days post-L4 adult hermaphrodite Ce, 3-fold embryo Ce, 5-days post-L4 adul…	N.A.	HGNC:10421|EnsEMBL-Compara;Hieranoid;Panther;OrthoFinder;SonicParanoid;PhylomeDB;Inparanoid;OMA;OrthoInspector	cytoplasm, cytosol, cytosolic small ribosomal subunit, ribonucleoprotein complex, ribosome, structural constituent of ribosome, translation	rps-1 encodes a small ribosomal subunit S3A protein.	Predicted to be a structural constituent of ribosome. Predicted to be involved in translation. Predicted to be located in cytosol. Predicted to be part of cytosolic small ribosomal subunit. Is an ortholog of human RPS3A (ribosomal protein S3A).	Enriched in germ line, somatic gonad precursor, excretory cell, M cell, ADA, CAN, hermaphrodite distal tip cell, male distal tip cell, excretory gland cell, I4 neuron, M1 neuron, m2R, m2L, MI neuron, NSM, RIG, RIH, anterior spermatheca, Posterior spermatheca, URB, URX and intestine according to RNA-seq, single-cell RNA-seq and microarray. Affected by sma-2, atx-3, daf-12, lec-1, daf-2, let-7, gld…	WBPaper00024704|pmid15654727, WBPaper00035215|pmid19763173, WBPaper00038491|pmid21647448, WBPaper00049828|pmid27405932, WBPaper00050442|pmid27833098, WBPaper00055090|pmid30120140
chrI	1155402	1156020	619	2	171691	NM_170798	WBGene00000165	aps-3	Clat_adaptor_s domain-containing protein	WBGene00000165	aps-3	Caenorhabditis elegans	protein_coding_gene	Y48G8AL.14	apt-8, CELE_Y48G8AL.14	Y48G8AL.14.1	CEOP1939	CE30461	CE30461|HMMPANTHER:PTHR11753|HMMPANTHER:PTHR11753:SF10|SCANPROSITE:PS00989|PFAM:PF01217|SUPERFAMILY:SSF64356|INTERPRO:IPR011012|INTERPRO:IPR016635|INTERPRO:IPR022775	Q8T874	Q8T874	TF300189	NM_001392848.1	NP_001380048.1	I -16.94 +/- 0.00	cenix:237-e4, WBPaper00038381:Y48G8AL_1_1, sjj_Y48G8A_3945.e|I-7H16, sjj2_Y48G8AL.14|I-9G06	apoptosis reduced, dumpy, embryonic lethal, germline nuclear positioning variant, larval arrest, lysosome-related organelle localization variant, lysosome-related organelle morphology variant, maternal sterile, oocyte number decreased, oogenesis variant, rachis morphology variant, sterile, transgene subcellular localization variant	N.A.	gk523799|Substitution|Missense, gk716184|Substitution|Missense, gk725746|Substitution|Missense, otn1105|Substitution|Missense	ser-1|Physical	N.A.	AFD, body wall muscle cell, DA neuron, germ line, neuron, VA neuron	N.A.	1-day post-L4 adult hermaphrodite Ce, 10-days post-L4 adult hermaphrodite Ce, 2-days post-L4 adult hermaphrodite Ce, 20-days post-L4 adult hermaphrodite Ce, 3-days post-L4 adult hermaphrodite Ce, 3-fold embryo Ce, 4-cell embryo Ce, 6-days post-L4 adult hermaphrodite Ce, 7-10 days post-L4 adult hermaphrodite Ce, adult Ce, adult hermaphrodite Ce, all stages Ce, blastula embryo Ce, dauer larva Ce, e…	N.A.	HGNC:2013|EnsEMBL-Compara;Hieranoid;Panther;OrthoFinder;SonicParanoid;PhylomeDB;Inparanoid;OMA;OrthoInspector, HGNC:571|EnsEMBL-Compara;Hieranoid;Panther;OrthoFinder;SonicParanoid;PhylomeDB;Inparanoid;OMA;OrthoInspector	cytoplasmic vesicle membrane, intracellular membrane-bounded organelle, membrane, protein transport, vesicle-mediated transport	aps-3 encodes an adaptin orthologous to the sigma3 subunit of the heterotetrameric adaptor protein complex 3 (AP-3)\; by homology, APS-3 is predicted to play a role in intracellular membrane trafficking and specifically, may be involved in transport of lysosomal membrane proteins from tubular sorting endosomes to lysosomes\; loss of aps-3 activity via large-scale RNAi screens in the sensitized rr…	Predicted to be involved in vesicle-mediated transport. Predicted to be located in intracellular membrane-bounded organelle. Is an ortholog of human AP3S1 (adaptor related protein complex 3 subunit sigma 1) and AP3S2 (adaptor related protein complex 3 subunit sigma 2).	Enriched in DA neuron, VA neuron, neuron, body wall muscle cell, AFD and germ line according to tiling array and RNA-seq. Affected by cyc-1, tatn-1, csr-1, gld-2, clk-1, htz-1, npr-1, cox-5B, hsf-1, flp-6, mir-34, glh-4, glh-1, pgl-1, pgl-3, emb-4, sma-4, daf-2, nuo-6, adr-2, dlc-1, eat-2, pmt-2, atfs-1, nhl-2, iff-1, wdr-5.1, set-2, hlh-11 and unc-30 according to microarray and RNA-seq. Affected…	WBPaper00004907|pmid11598180, WBPaper00026639|pmid15995364, WBPaper00029101|pmid17289575, WBPaper00031800|pmid18419309, WBPaper00032502|pmid19151087, WBPaper00038491|pmid21647448, WBPaper00055090|pmid30120140
chrV	15395713	15397067	1355	1	180040	NM_001028941	WBGene00000868	cyb-3	G2/mitotic-specific cyclin-B3	WBGene00000868	cyb-3	Caenorhabditis elegans	protein_coding_gene	T06E6.2	cyb-2, CELE_T06E6.2	T06E6.2a.1, T06E6.2a.2, T06E6.2b.1	N.A.	CE45171, CE45189	CE45171|HMMPANTHER:PTHR10177:SF214|HMMPANTHER:PTHR10177|PIRSF:PIRSF001771|SMART:SM00385|SMART:SM01332|PFAM:PF00134|PFAM:PF02984|SUPERFAMILY:SSF47954|INTERPRO:IPR004367|INTERPRO:IPR006671|INTERPRO:IPR013763|INTERPRO:IPR015452|INTERPRO:IPR036915|INTERPRO:IPR039361, CE45189|HMMPANTHER:PTHR10177|HMMPANTHER:PTHR10177:SF214|PIRSF:PIRSF001771|SMART:SM01332|SMART:SM00385|PFAM:PF00134|PFAM:PF02984|SUPERFA…	Q10654	Q10654	TF101001	NM_074424.10, NM_001028941.4	NP_001024112.2, NP_506825.4	V 7.98 +/- 0.01	cenix:143-g1, mv_T06E6.2, sjj_T06E6.2|V-10K05, cenix:10-c6, mv_AAA84395	cell cycle slow early emb, cell cycle timing defective early emb, cell membrane organization biogenesis variant, chromosome condensation variant, cytokinesis fails early emb, early embryonic lethal, ectopic cleavage furrow early emb, embryonic lethal, excessive blebbing early emb, gametogenesis variant, germ cell compartment expansion absent, germ cell compartment expansion variant, germ cell com…	N.A.	gk255702|Substitution|Missense, gk255703|Substitution|Missense, gk345764|Substitution|Missense, gk498711|Substitution|Missense, gk515641|Substitution|Missense, gk550638|Substitution|Missense, gk572963|Substitution|Missense, gk633983|Substitution|Missense, gk753318|Substitution|Missense, gk797788|Substitution|Missense, gk888300|Substitution|Missense, gk902776|Substitution|Missense	zyg-11|Genetic;Regulatory, cdk-1|Physical, dhc-1|Regulatory, dpl-1|Regulatory, efl-1|Regulatory, npp-5|Genetic, par-2|Genetic, par-3|Physical, smo-1|Physical	AB, EMS, germ cell, germ line, gonad, male gonad, Psub1, Psub2	ABalapapap, ABalapppaa, ABalapppap, ABalpapaap, ABalpappaa, ABalpppapa, ABalpppppp, ABarapapaa, ABarappaap, ABplaapaap, ABplapaaaa, ABplapappp, ABplpaaaaa, ABplpaaapp, ABplpappaa, ABplpppapa, ABplppppap, ABplpppppp, ABpraaaapa, ABpraaappp, ABpraapaap, ABprapaaaa, ABprapappp, ABprpaaaaa, ABprpaaapp, ABprpppapa, ABprppppap, ABprpppppp, ADE, ADF, ADL, AFD, AQR, ASE, ASG, ASH, ASI, ASJ, ASK, AWA, AWB…	2-cell embryo Ce, 4-cell embryo Ce, adult Ce, embryo Ce, L1 larva Ce, L2 larva Ce, L3 larva Ce, L4 larva Ce, newly molted young adult hermaphrodite Ce	1-cell embryo Ce, 1-day post-L4 adult hermaphrodite Ce, 10-days post-L4 adult hermaphrodite Ce, 2-days post-L4 adult hermaphrodite Ce, 20-days post-L4 adult hermaphrodite Ce, 3-days post-L4 adult hermaphrodite Ce, 3-fold embryo Ce, 4-days post-L4 adult hermaphrodite Ce, 5-days post-L4 adult hermaphrodite Ce, 6-days post-L4 adult hermaphrodite Ce, 7-10 days post-L4 adult hermaphrodite Ce, adult Ce…	N.A.	HGNC:18709|EnsEMBL-Compara;Panther;OrthoFinder;PhylomeDB;OrthoInspector	cell cycle, cell division, centrosome cycle, centrosome, cyclin-dependent protein kinase holoenzyme complex, cyclin-dependent protein serine/threonine kinase regulator activity, cytoplasm, kinetochore organization, meiotic cell cycle, meiotic sister chromatid segregation, mitotic cell cycle phase transition, mitotic cell cycle, mitotic sister chromatid segregation, nematode male tail tip morphoge…	cyb-3 encodes one of four C. elegans cyclin B family members that is most closely related to the B3-type cyclins\; cyb-3 is required for a number of dynein-related mitotic processes and specifically for initiation of anaphase chromosome segregation\; cyb-3 is also required for completion of meiosis II and proper pronuclear migration, centrosome maturation, and pronuclear condensation in the ferti…	Enables cyclin-dependent protein serine\/threonine kinase regulator activity. Involved in several processes, including chromosome organization\; regulation of cell cycle\; and sexual reproduction. Acts upstream of or within nematode male tail tip morphogenesis. Located in cytoplasm and nucleus. Expressed in several structures, including EMS\; Psub2\; germ cell\; germ line\; and male gonad. Is an …	Enriched in cephalic sheath cell, germ line, ABplapaaaa, ABprapaaaa, body wall muscle cell, ADF, ADL, AFD, ASE, ASG, ASH, ASI, ASJ, ASK, AWA, AWB, AWC, AQR, PVR, PQR, IL2 neuron, IL1 neuron, CEP, ADE, PDE, BAG, FLP, OLL, OLQ, PHA, PHB, ABplpappaa, ABarapapaa, ABalpappaa, ABalpppapa, ABpraaaapa, ABalapppaa, ABpraaappp, ABalpppppp, ABplpaaaaa, ABprpaaaaa, ABprpaaapp, ABplpaaapp, ABalapapap, ABalapp…	WBPaper00004349|pmid11030340, WBPaper00010444|pmid N.A., WBPaper00024430|pmid15215208, WBPaper00026430|pmid N.A., WBPaper00026516|pmid N.A., WBPaper00026975|pmid16343905, WBPaper00027048|pmid16421191, WBPaper00027080|pmid16461272, WBPaper00027234|pmid18050422, WBPaper00028560|pmid17021038, WBPaper00028806|pmid17115027, WBPaper00029328|pmid17466069, WBPaper00033122|pmid19368797, WBPaper00034233|pm…
chrII	11545714	11546971	1258	1	3564910	NM_064067	WBGene00001031	dnj-13	J domain-containing protein	WBGene00001031	dnj-13	Caenorhabditis elegans	protein_coding_gene	F54D5.8	CELE_F54D5.8	F54D5.8.1	CEOP2560	CE03412	CE03412|HMMPANTHER:PTHR24078:SF525|HMMPANTHER:PTHR24078|PFSCAN:PS50076|PRINTS:PR00625|SCANPROSITE:PS00636|SMART:SM00271|PFAM:PF00226|PFAM:PF01556|SUPERFAMILY:SSF49493|SUPERFAMILY:SSF46565|INTERPRO:IPR001623|INTERPRO:IPR002939|INTERPRO:IPR008971|INTERPRO:IPR036869	Q20774	Q20774	N.A.	NM_001381610.3	NP_001366737.1	II 3.75 +/- 0.01	cenix:201-c11, mv_F54D5.8, sjj_F54D5.8|II-7L08	head morphology variant, protein aggregation variant, protruding vulva, reduced brood size, sterile	lethal, sterile	gk155360|Substitution|Missense, gk390504|Substitution|Missense, gk612321|Substitution|Missense, gk704713|Substitution|Missense, gk748814|Substitution|Missense, gk873969|Substitution|Missense	ain-1|Physical, alg-1|Physical, cdc-37|Physical, csr-1|Physical, dlg-1|Physical, dnj-12|Physical, dnj-13|Physical, dnj-13|Physical, dnj-19|Physical, enri-2|Physical, glh-1|Physical, hsp-1|Physical, malt-1|Physical, nrde-2|Physical, sec-6|Physical, smo-1|Physical, unc-23|Genetic, zen-4|Physical	N.A.	AFD, AVK, DD neuron, germ line, NSM, PLM, RIS, somatic gonad precursor, VB1, VB10, VB11, VB2, VB3, VB4, VB5, VB6, VB7, VB8, VB9	N.A.	1-cell embryo Ce, 1-day post-L4 adult hermaphrodite Ce, 10-days post-L4 adult hermaphrodite Ce, 2-days post-L4 adult hermaphrodite Ce, 20-days post-L4 adult hermaphrodite Ce, 3-days post-L4 adult hermaphrodite Ce, 6-days post-L4 adult hermaphrodite Ce, adult Ce, adult hermaphrodite Ce, adult male Ce, all stages Ce, blastula embryo Ce, dauer larva Ce, embryo Ce, L1 larva Ce, L2 larva Ce, L2d larva…	N.A.	HGNC:5270|EnsEMBL-Compara;Hieranoid;OrthoFinder;SonicParanoid;PhylomeDB;Inparanoid;OrthoInspector, HGNC:14886|Hieranoid;OrthoFinder;SonicParanoid;PhylomeDB;Inparanoid;OMA;OrthoInspector, HGNC:14887|Hieranoid;Panther;OrthoFinder;SonicParanoid;PhylomeDB;Inparanoid;OMA;OrthoInspector	ATPase activator activity, chaperone binding, chaperone cofactor-dependent protein refolding, cytosol, negative regulation of transcription by RNA polymerase II, protein folding, unfolded protein binding	This gene encodes a protein containing a DnaJ ('J') domain.	Enables ATPase activator activity. Predicted to be involved in chaperone cofactor-dependent protein refolding and negative regulation of transcription by RNA polymerase II. Predicted to be located in cytosol. Is an ortholog of human DNAJB5 (DnaJ heat shock protein family (Hsp40) member B5).	Enriched in NSM, AFD, PLM, germ line, AVK, somatic gonad precursor, RIS, VB1, VB11, VB10, VB9, VB8, VB7, VB6, VB5, VB4, VB3, VB2 and DD neuron according to RNA-seq, single-cell RNA-seq and microarray. Affected by cyc-1, alg-1, cid-1, egl-5, daf-12, let-7, gld-1, tatn-1, lem-2, emr-1, clk-1, htz-1, ham-3, jmjd-1.2, hsf-1, set-25, met-2, mir-34, glp-1, glh-4, glh-1, pgl-1, pgl-3, emb-4, sma-2, sma-…	WBPaper00038491|pmid21647448, WBPaper00038729|pmid N.A., WBPaper00040951|pmid22479492, WBPaper00045536|pmid25053410, WBPaper00048970|pmid26245380, WBPaper00055090|pmid30120140, WBPaper00061869|pmid34469721, WBPaper00062082|pmid34725424, WBPaper00064112|pmid35643773
chrII	9054979	9056444	1466	1	174442	NM_063532	WBGene00011976	chmp-7	Charged Multivesicular Body Protein homolog	WBGene00011976	chmp-7	Caenorhabditis elegans	protein_coding_gene	T24B8.2	CELE_T24B8.2	T24B8.2.1	N.A.	CE03710	CE03710|PhosphoPep:T24B8.2|HMMPANTHER:PTHR22761:SF46|HMMPANTHER:PTHR22761|PFAM:PF03357|INTERPRO:IPR005024	Q22718	Q22718	TF312851	NM_063532.8	NP_495933.1	II 0.994908	sjj_T24B8.2, mv_T24B8.2, sjj2_T24B8.2|II-10D05, cenix:200-g9	N.A.	N.A.	gk336978|Substitution|Missense, gk444038|Substitution|Nonsense, gk513107|Substitution|Missense, gk705901|Substitution|Missense, gk901056|Substitution|Missense	emr-1|Physical, lem-2|Physical, mafr-1|Physical, vps-60|Physical	N.A.	ABalapaaaa, ABalappapa, ABalppappa, ABalppppaa, ABalpppppa, ABarappppa, ABplaapapa, ABplapappp, ABplapppaa, ABpraaapaa, ABpraaappa, ABpraapapa, ABprapappp, ABprapppaa, germ line, seam cell, somatic gonad precursor	N.A.	1-cell embryo Ce, 1-day post-L4 adult hermaphrodite Ce, 10-days post-L4 adult hermaphrodite Ce, 2-days post-L4 adult hermaphrodite Ce, 20-days post-L4 adult hermaphrodite Ce, 3-fold embryo Ce, 6-days post-L4 adult hermaphrodite Ce, 7-10 days post-L4 adult hermaphrodite Ce, adult Ce, adult hermaphrodite Ce, adult male Ce, all stages Ce, blastula embryo Ce, dauer larva Ce, embryo Ce, L1 larva Ce, L…	N.A.	HGNC:28439|Hieranoid;OrthoFinder;PhylomeDB;Inparanoid;OMA;OrthoInspector	cytoplasmic side of plasma membrane, ESCRT III complex, late endosome to vacuole transport via multivesicular body sorting pathway, multivesicular body, vacuolar transport, vesicle budding from membrane	N.A.	Predicted to be involved in late endosome to vacuole transport via multivesicular body sorting pathway and vesicle budding from membrane. Predicted to be located in cytoplasmic side of plasma membrane and multivesicular body. Predicted to be part of ESCRT III complex. Is an ortholog of human CHMP7 (charged multivesicular body protein 7).	Enriched in seam cell, germ line, somatic gonad precursor, ABpraaapaa, ABalppppaa, ABalapaaaa, ABalappapa, ABpraaappa, ABalpppppa, ABpraapapa, ABplaapapa, ABalppappa, ABarappppa, ABprapappp, ABplapappp, ABplapppaa and ABprapppaa according to RNA-seq and single-cell RNA-seq. Affected by isp-1, daf-12, tatn-1, jmjd-3.1, glp-1, emb-4, daf-2, hpl-2, damt-1, pals-22, iff-1, set-6, baz-2, egl-43, srbc-…	WBPaper00038491|pmid21647448, WBPaper00055090|pmid30120140, WBPaper00062371|pmid35045304
chrII	11545464	11545613	150	2	13187190	NR_051725	WBGene00195341	F54D5.18	ncRNA	WBGene00195341	F54D5.18	Caenorhabditis elegans	ncRNA_gene	F54D5.18	CELE_F54D5.18	F54D5.18	N.A.	N.A.	N.A.	N.A.	N.A.	N.A.	NR_051725.1	N.A.	II 3.749396	N.A.	N.A.	N.A.	N.A.	N.A.	N.A.	N.A.	N.A.	N.A.	N.A.	N.A.	N.A.	N.A.	N.A.	N.A.	N.A.
chrIV	7083735	7084661	927	2	177481	NM_068702	WBGene00004473	rps-4	40S ribosomal protein S4	WBGene00004473	rps-4	Caenorhabditis elegans	protein_coding_gene	Y43B11AR.4	CELE_Y43B11AR.4	Y43B11AR.4.1	N.A.	CE24278	CE24278|HMMPANTHER:PTHR11581|HMMPANTHER:PTHR11581:SF0|PIRSF:PIRSF002116|SCANPROSITE:PS00528|PFAM:PF16121|PFAM:PF00900|PFAM:PF08071|INTERPRO:IPR000876|INTERPRO:IPR013843|INTERPRO:IPR013845|INTERPRO:IPR014722|INTERPRO:IPR032277|INTERPRO:IPR036986|INTERPRO:IPR038237	Q9N3X2	Q9N3X2	TF300612	NM_068702.8	NP_501103.1	IV 3.29 +/- 0.00	cenix:214-h3, sjj2_Y43B11AR.4.1|IV-9H05, mv_G_YK1846	embryonic lethal, pleiotropic defects severe early emb, slow growth, thin, transgene expression undetectable	N.A.	gk204787|Substitution|Missense, gk466180|Substitution|Missense, gk494703|Substitution|Missense, gk557220|Substitution|Missense, gk621433|Substitution|Missense, gk644832|Substitution|Missense, gk869002|Substitution|Missense, gk883930|Substitution|Missense	cfp-1|Physical, elks-1|Physical, glh-1|Physical, icd-1|Physical, mars-1|Physical, myrf-1|Physical, myrf-2|Physical, nrde-2|Physical, pan-1|Physical, pid-3|Physical, prg-1|Physical, prmt-1|Physical, sec-6|Physical, sip-1|Physical, smo-1|Physical, spc-1|Physical, tofu-6|Physical, tost-1|Physical	body wall musculature, gonadal sheath cell, head neuron, hypodermis, intestine, nervous system, pharynx, reproductive system, seam cell, spermatheca, tail neuron, vulval muscle	anterior spermatheca, CAN, excretory cell, excretory gland cell, germ line, hermaphrodite distal tip cell, I4 neuron, M cell, m2L, m2R, male distal tip cell, MCL, MCR, NSM, Posterior spermatheca, Psub1, RIG, RIH, somatic gonad precursor	adult Ce, larva Ce	1-day post-L4 adult hermaphrodite Ce, 10-days post-L4 adult hermaphrodite Ce, 11-15 days post-L4 adult hermaphrodite Ce, 14-days post-L4 adult hermaphrodite Ce, 15-days post-L4 adult hermaphrodite Ce, 16-18 days post-L4 adult hermaphrodite Ce, 2-cell embryo Ce, 2-days post-L4 adult hermaphrodite Ce, 20-days post-L4 adult hermaphrodite Ce, 3-days post-L4 adult hermaphrodite Ce, 5-days post-L4 adul…	N.A.	HGNC:10424|EnsEMBL-Compara;Hieranoid;Panther;OrthoFinder;SonicParanoid;PhylomeDB;Inparanoid;OMA;OrthoInspector, HGNC:10425|EnsEMBL-Compara;Hieranoid;Panther;OrthoFinder;SonicParanoid;PhylomeDB;Inparanoid;OMA;OrthoInspector, HGNC:18501|EnsEMBL-Compara;Hieranoid;Panther;OrthoFinder;SonicParanoid;PhylomeDB;Inparanoid;OMA;OrthoInspector	cytosolic small ribosomal subunit, ribonucleoprotein complex, ribosome, RNA binding, rRNA binding, structural constituent of ribosome, translation	rps-4 encodes a small ribosomal subunit S4 protein.	Predicted to enable RNA binding activity. Predicted to be a structural constituent of ribosome. Predicted to be involved in translation. Predicted to be located in ribosome. Predicted to be part of cytosolic small ribosomal subunit. Is an ortholog of human RPS4X (ribosomal protein S4 X-linked)\; RPS4Y1 (ribosomal protein S4 Y-linked 1)\; and RPS4Y2 (ribosomal protein S4 Y-linked 2).	Enriched in Psub1, germ line, somatic gonad precursor, excretory cell, M cell, CAN, hermaphrodite distal tip cell, male distal tip cell, excretory gland cell, I4 neuron, m2R, m2L, MCR, MCL, NSM, RIG, RIH, anterior spermatheca and Posterior spermatheca according to RNA-seq and single-cell RNA-seq. Affected by sti-1, age-1, atx-3, K10D11.2, eat-2, let-7, gld-1, lin-35, jmjd-3.1, jmjd-1.2, dep-1, gl…	WBPaper00005697|pmid12560808, WBPaper00031006|pmid17850180, WBPaper00033208|pmid19467242, WBPaper00038491|pmid21647448, WBPaper00049828|pmid27405932, WBPaper00055090|pmid30120140
chrI	2928397	2929351	955	1	171865	NM_058675	WBGene00022122	trap-1	Signal sequence receptor subunit alpha	WBGene00022122	trap-1	Caenorhabditis elegans	protein_coding_gene	Y71F9AM.6	CELE_Y71F9AM.6	Y71F9AM.6.1	CEOP1076	CE26244	CE26244|PhosphoPep:Y71F9AM.6|HMMPANTHER:PTHR12924|HMMPANTHER:PTHR12924:SF0|PFAM:PF03896|INTERPRO:IPR005595	Q95XT5	Q95XT5	TF321074	NM_058675.6	NP_491076.1	I -5.29 +/- 0.00	cenix:77-a1	embryonic lethal	N.A.	gk106235|Substitution|Missense, gk106236|Substitution|Missense, gk376513|Substitution|Missense, gk623184|Substitution|Missense, gk676160|Substitution|Missense, gk825180|Substitution|Missense	cdc-42|Physical, csr-1|Physical, dlg-1|Physical, glh-1|Physical, hsp-16.2|Physical, igdb-2|Physical, let-413|Physical, lgl-1|Physical, mafr-1|Physical, myrf-1|Physical, nrde-2|Physical, par-3|Physical, pid-3|Physical, sip-1|Physical, smo-1|Physical, spe-39|Physical, vps-45|Physical, zen-4|Physical	N.A.	ABplpppapa, ABprpppapa, anterior spermatheca, hermaphrodite distal tip cell, male distal tip cell, marginal cell, mc1DL, mc1DR, mc1V, mc3, Posterior spermatheca	all stages Ce	1-cell embryo Ce, 1-day post-L4 adult hermaphrodite Ce, 10-days post-L4 adult hermaphrodite Ce, 11-15 days post-L4 adult hermaphrodite Ce, 2-days post-L4 adult hermaphrodite Ce, 20-days post-L4 adult hermaphrodite Ce, 3-days post-L4 adult hermaphrodite Ce, 6-days post-L4 adult hermaphrodite Ce, 7-10 days post-L4 adult hermaphrodite Ce, adult Ce, adult hermaphrodite Ce, adult male Ce, all stages C…	N.A.	HGNC:11323|EnsEMBL-Compara;Hieranoid;Panther;OrthoFinder;SonicParanoid;PhylomeDB;Inparanoid;OMA;OrthoInspector	endoplasmic reticulum membrane, endoplasmic reticulum, integral component of membrane, membrane	N.A.	Predicted to be located in endoplasmic reticulum. Is an ortholog of human SSR1 (signal sequence receptor subunit 1).	Enriched in mc1V, mc1DR, mc1DL, mc3, ABprpppapa, ABplpppapa, marginal cell, hermaphrodite distal tip cell, male distal tip cell, anterior spermatheca and Posterior spermatheca according to single-cell RNA-seq. Affected by cyc-1, aak-2, lin-15B, alg-3, alg-4, tatn-1, clk-1, tdp-1, crtc-1, daf-2, daf-16, npr-1, jmjd-3.1, jmjd-1.2, hsf-1, set-25, met-2, mir-34, emb-4, sma-2, sma-4, smo-1, isp-1, set…	WBPaper00038491|pmid21647448, WBPaper00047692|pmid N.A., WBPaper00055090|pmid30120140, WBPaper00058976|pmid31840061, WBPaper00061795|pmid34365052, WBPaper00062388|pmid35036864, WBPaper00062794|pmid N.A.
chrIV	9095905	9096039	135	2	177731	NM_001307137	WBGene00007223	znf-706	4F5 domain-containing protein	WBGene00007223	znf-706	Caenorhabditis elegans	protein_coding_gene	C01F6.9	CELE_C01F6.9	C01F6.9a.1, C01F6.9c.1	CEOP4324	CE17361, CE49692	CE17361|HMMPANTHER:PTHR21213:SF18|HMMPANTHER:PTHR21213|PFAM:PF04419|SUPERFAMILY:SSF118359|INTERPRO:IPR007513|INTERPRO:IPR026939|INTERPRO:IPR045230, CE49692|SUPERFAMILY:SSF118359	X5M911, G5EDA6	G5EDA6	N.A.	NM_001307137.1, NM_069182.4	NP_501583.1, NP_001294066.1	IV 4.04	mv_C01F6.9, cenix:135-g5, sjj_C01F6.9|IV-4L23	slow growth	lethal, sterile	N.A.	comt-3|Physical	N.A.	AFD, germ line, intestine	N.A.	1-day post-L4 adult hermaphrodite Ce, 2-days post-L4 adult hermaphrodite Ce, 3-fold embryo Ce, 7-10 days post-L4 adult hermaphrodite Ce, adult Ce, adult hermaphrodite Ce, adult male Ce, all stages Ce, blastula embryo Ce, dauer larva Ce, embryo Ce, L1 larva Ce, L2 larva Ce, L3 larva Ce, L4 larva Ce	N.A.	HGNC:24992|EnsEMBL-Compara;Hieranoid;Panther;OrthoFinder;PhylomeDB;OMA;OrthoInspector	cytoplasm, nucleus	The C01F6.9 gene resides in an operon that also contains the genes icl-1 and lpl-1.	Predicted to be located in cytoplasm and nucleus. Is an ortholog of human ZNF706 (zinc finger protein 706).	Enriched in intestine, AFD and germ line according to RNA-seq, proteomic study and microarray. Affected by cgh-1, isp-1, aak-2, alg-3, alg-4, tatn-1, clk-1, npr-1, jmjd-3.1, jmjd-1.2, hsf-1, mir-34, cebp-1, sma-2, sma-4, lin-22, aak-1, cfp-1, egl-43, sir-2.1 and gei-8 according to microarray and RNA-seq. Affected by rotenone, bisphenol S, Diazinon and Chlorpyrifos according to RNA-seq and microar…	WBPaper00038491|pmid21647448, WBPaper00055090|pmid30120140
chrI	12918727	12919106	380	1	173160	NM_001026551	WBGene00001427	fkb-2	Peptidylprolyl isomerase	WBGene00001427	fkb-2	Caenorhabditis elegans	protein_coding_gene	Y18D10A.19	CELE_Y18D10A.19	Y18D10A.19.1	CEOP1903	CE21417	CE21417|HMMPANTHER:PTHR10516|HMMPANTHER:PTHR10516:SF420|PFSCAN:PS50059|PFAM:PF00254|SUPERFAMILY:SSF54534|INTERPRO:IPR001179|INTERPRO:IPR046357	Q9U2Q8	Q9U2Q8	TF105291	NM_001026551.7	NP_001021722.1	I 14.22 +/- 0.00	mv_Y18D10A.19b, mv_AAA68610, mv_Y18D10A.19c	N.A.	N.A.	gk125978|Substitution|Missense	hcp-3|Physical, hsp-16.2|Physical, myrf-1|Physical, myrf-2|Physical, pid-3|Physical, sec-6|Physical, smo-1|Physical	N.A.	AIZ, germ line, hermaphrodite distal tip cell, male distal tip cell, PLM, RIG, somatic gonad precursor	N.A.	1-day post-L4 adult hermaphrodite Ce, 10-days post-L4 adult hermaphrodite Ce, 11-15 days post-L4 adult hermaphrodite Ce, 2-days post-L4 adult hermaphrodite Ce, 20-days post-L4 adult hermaphrodite Ce, 3-days post-L4 adult hermaphrodite Ce, 6-days post-L4 adult hermaphrodite Ce, 7-10 days post-L4 adult hermaphrodite Ce, adult Ce, adult hermaphrodite Ce, adult male Ce, all stages Ce, blastula embryo…	Graves' disease|By Orthology	HGNC:3711|Hieranoid;Panther;SonicParanoid;Inparanoid;OMA;OrthoInspector, HGNC:3712|Hieranoid;Panther;SonicParanoid;Inparanoid;OMA;OrthoInspector, HGNC:21376|Hieranoid;Panther;SonicParanoid;Inparanoid;OMA;OrthoInspector	chaperone-mediated protein folding, cytoplasm, isomerase activity, peptidyl-prolyl cis-trans isomerase activity, protein peptidyl-prolyl isomerization	fkb-2 encodes a peptidylprolyl cis\/trans isomerase homologous to the mammalian FK506 immunosuppressant-binding protein 1A (FKBP1A, OMIM:186945, mutations associated with myocardial noncompaction)\; by homology, FKB-2 could function in a number of processes including protein folding, signal transduction, and regulation of muscle contraction\; however, the precise role of FKB-2 in C. elegans devel…	Predicted to enable peptidyl-prolyl cis-trans isomerase activity. Predicted to be involved in chaperone-mediated protein folding and protein peptidyl-prolyl isomerization. Predicted to be located in cytoplasm. Human ortholog(s) of this gene implicated in Graves' disease. Is an ortholog of human FKBP1A (FKBP prolyl isomerase 1A)\; FKBP1B (FKBP prolyl isomerase 1B)\; and FKBP1C (FKBP prolyl isomera…	Enriched in PLM, germ line, somatic gonad precursor, AIZ, hermaphrodite distal tip cell, male distal tip cell and RIG according to RNA-seq and single-cell RNA-seq. Affected by let-7, gld-1, tatn-1, prg-1, daf-16, daf-2, npr-1, cox-5B, jmjd-3.1, jmjd-1.2, cec-4, mir-34, glh-4, glh-1, pgl-1, pgl-3, emb-4, sma-2, sma-4, isp-1, nuo-6, pry-1, ints-5, sek-1, aak-1, aak-2, pid-3, nmad-1, unc-70, iff-1, …	WBPaper00004285|pmid10931176, WBPaper00026884|pmid18629211, WBPaper00038491|pmid21647448, WBPaper00055090|pmid30120140, WBPaper00063935|pmid35399287, WBPaper00064046|pmid35506650
chrII	5054261	5055155	895	2	173872	NM_062530	WBGene00002068	ify-1	Securin-like protein	WBGene00002068	ify-1	Caenorhabditis elegans	protein_coding_gene	C27A2.3	CELE_C27A2.3	C27A2.3.1	N.A.	CE04103	CE04103|PhosphoPep:C27A2.3	Q18235	Q18235	TF318045	NM_062530.11	NP_494931.1	II -2.58 +/- 0.00	sjj_C27A2.3|II-4O05, mv_C27A2.3, cenix:16-a11	accumulated germline cell corpses, apoptosis variant, cell cell contacts abnormal in four cell embryo, cell cycle slow early emb, chromosome condensation variant, chromosome segregation variant, cytokinesis defective early emb, dead eggs laid, diplotene progression during oogenesis variant, ectopic cleavage furrow early emb, embryo osmotic integrity defective early emb, embryo osmotic pressure se…	embryonic lethal, lethal, sterile	gk385387|Substitution|Missense, gk555504|Substitution|Missense, gk691754|Substitution|Missense, gk752955|Substitution|Missense, gk858451|Substitution|Missense, gk870790|Substitution|Missense	etc-1|Regulatory, fzy-1|Physical, sep-1|Physical, wwp-1|Physical, Y71G12B.27|Physical	germ cell, germ line	ABalapaaaa, ABalappaap, ABalappapa, ABalpappaa, ABalpapppa, ABalppppaa, ABalpppppa, ABalpppppp, ABalppppppa, ABaraapapp, ABaraappaa, ABaraapppp, ABarapapaa, ABarapappa, ABplaapaaa, ABplaapaap, ABplapaaaa, ABplapappp, ABplapppaa, ABplpaaaaa, ABplpapapa, ABplpapppa, ABplppaaaap, ABplppaapa, ABplpppaapa, ABpraaapaa, ABpraaappa, ABpraaappp, ABpraaapppa, ABpraapaaa, ABpraapaap, ABprapaaaa, ABprapappp,…	N.A.	1-cell embryo Ce, 1-day post-L4 adult hermaphrodite Ce, 2-days post-L4 adult hermaphrodite Ce, 3-days post-L4 adult hermaphrodite Ce, 3-fold embryo Ce, 4-days post-L4 adult hermaphrodite Ce, 5-days post-L4 adult hermaphrodite Ce, 7-10 days post-L4 adult hermaphrodite Ce, adult Ce, adult hermaphrodite Ce, adult male Ce, all stages Ce, blastula embryo Ce, dauer larva Ce, embryo Ce, L1 larva Ce, L2 …	N.A.	N.A.	cell cycle, cell division, centrosome duplication, centrosome localization, chromosome, condensed chromosome, cortical granule exocytosis, cytoplasm, cytoskeleton, meiotic cell cycle, meiotic chromosome separation, mitotic cytokinesis, mitotic sister chromatid separation, polar body extrusion after meiotic divisions, protease binding, protein binding, protein stabilization, spindle microtubule, s…	ify-1 encodes a rapidly evolving protein ligand of FZY-1, with only 53\% identity between C. elegans and C. briggsae and with no visible homologs in more distant species\; IFY-1 binds FZY-1 and SEP-1 in yeast two-hybrid assays\; ify-1(RNAi) and sep-1(RNAi) animals arrest as one-cell embryos with disorganized chromosomes, supporting the hypothesis that IFY-1 is a securin\; the fzy-1(h1983) mutatio…	Enables protease binding activity and ubiquitin protein ligase binding activity. Involved in several processes, including cortical granule exocytosis\; nuclear division\; and protein stabilization. Located in condensed chromosome\; cytoplasm\; and spindle microtubule. Expressed in germ cell.	Enriched in germline precursor cell, germ line, ABplapaaaa, ABprapaaaa, ABpraaapaa, ABalppppaa, ABpraaapppa, ABalppppppa, ABalapaaaa, ABalappapa, ADF, ADL, AFD, ASE, ASG, ASH, ASI, ASJ, ASK, AWA, AWB, AWC, AQR, PVR, PQR, IL2 neuron, IL1 neuron, CEP, ADE, PDE, BAG, FLP, OLL, OLQ, PHA, PHB, Caapa, MSpapapa, MSaapapa, GLRVR, GLRVL, GLRR, GLRL, GLRDR, GLRDL, ABarapappa, ABalpapppa, ABarapapaa, ABalpa…	WBPaper00005604|pmid12498686, WBPaper00006435|pmid14993261, WBPaper00027223|pmid18050489, WBPaper00027315|pmid18050424, WBPaper00028457|pmid16950115, WBPaper00029006|pmid17237515, WBPaper00031064|pmid17913784, WBPaper00031557|pmid18309291, WBPaper00035228|pmid19805813, WBPaper00036019|pmid20308279, WBPaper00042232|pmid23578927, WBPaper00052957|pmid28839119, WBPaper00057715|pmid N.A., WBPaper00060…
chrIII	3503779	3505036	1258	2	3564813	NM_065321	WBGene00010809	lias-1	Lipoyl synthase, mitochondrial	WBGene00010809	lias-1	Caenorhabditis elegans	protein_coding_gene	M01F1.3	CELE_M01F1.3	M01F1.3.1, M01F1.3.2	CEOP3124	CE01031	CE01031|HMMPANTHER:PTHR10949|HMMPANTHER:PTHR10949:SF0|PFSCAN:PS51918|PIRSF:PIRSF005963|SMART:SM00729|TIGRFAM:TIGR00510|PFAM:PF04055|PFAM:PF16881|SUPERFAMILY:SSF102114|INTERPRO:IPR003698|INTERPRO:IPR006638|INTERPRO:IPR007197|INTERPRO:IPR013785|INTERPRO:IPR031691|Metal_ion_binding_site	Q21452	Q21452	TF300817	NM_065321.9	NP_497722.3	III -6.26	mv_M01F1.3, sjj_M01F1.3|III-1D22, TH:321D1, cenix:321-d1	avoids bacterial lawn, embryonic lethal, extended life span, larval arrest, organism development variant, slow growth, transposon silencing variant	N.A.	gk170931|Substitution|Missense, gk170932|Substitution|Missense, gk170933|Substitution|Missense, gk170934|Substitution|Missense, gk474163|Substitution|Missense, gk582944|Substitution|Missense, gk813977|Substitution|Missense, gk852868|Substitution|Missense	bar-1|Genetic, clk-2|Genetic, daf-2|Genetic, dhc-1|Genetic, egl-15|Genetic, let-756|Genetic, lit-1|Genetic	body wall musculature, excretory cell, intestine, pharynx, reproductive system, vulval muscle	anal depressor muscle, body wall musculature, germ line, intestine, muscle cell, pharynx, somatic gonad precursor, vulval muscle	adult Ce, larva Ce	1-day post-L4 adult hermaphrodite Ce, 10-days post-L4 adult hermaphrodite Ce, 20-days post-L4 adult hermaphrodite Ce, 3-days post-L4 adult hermaphrodite Ce, 3-fold embryo Ce, 4-cell embryo Ce, 5-days post-L4 adult hermaphrodite Ce, 6-days post-L4 adult hermaphrodite Ce, adult Ce, adult hermaphrodite Ce, adult male Ce, all stages Ce, dauer larva Ce, embryo Ce, L1 larva Ce, L2 larva Ce, L2d larva C…	pyruvate decarboxylase deficiency|By Orthology	HGNC:16429|EnsEMBL-Compara;Hieranoid;Panther;OrthoFinder;SonicParanoid;PhylomeDB;Inparanoid;OMA;OrthoInspector	4 iron, 4 sulfur cluster binding, catalytic activity, iron-sulfur cluster binding, lipoate biosynthetic process, lipoate synthase activity, metal ion binding, mitochondrion, protein lipoylation, sulfurtransferase activity, transferase activity	N.A.	Predicted to enable lipoate synthase activity. Predicted to be involved in lipoate biosynthetic process. Predicted to be located in mitochondrion. Human ortholog(s) of this gene implicated in pyruvate decarboxylase deficiency. Is an ortholog of human LIAS (lipoic acid synthetase).	Enriched in body wall musculature, vulval muscle, intestine, pharynx, anal depressor muscle, germ line, somatic gonad precursor and muscle cell according to Chronogram analysis, RNA-seq and microarray. Affected by alg-1, daf-12, atfs-1, spg-7, gld-2, clk-1, blmp-1, mir-34, emb-4, sma-2, sma-4, lin-22, isp-1, nuo-6, damt-1, nhl-2, aak-1, aak-2, cfp-1, sin-3, mrps-5, set-6, baz-2, egl-43, cox-5B, s…	WBPaper00038491|pmid21647448, WBPaper00055090|pmid30120140, WBPaper00060146|pmid32843480, WBPaper00061852|pmid34449775
chrII	12041957	12042146	190	2	24105049	NR_101758	WBGene00220134	Y17G7B.25	ncRNA	WBGene00220134	Y17G7B.25	Caenorhabditis elegans	snoRNA_gene	Y17G7B.25	cel-inc166, CELE_Y17G7B.25	Y17G7B.25	N.A.	N.A.	N.A.	N.A.	N.A.	N.A.	NR_101758.1	N.A.	II 5.986231	N.A.	N.A.	N.A.	N.A.	N.A.	N.A.	N.A.	N.A.	N.A.	N.A.	N.A.	N.A.	N.A.	Is affected by cep-1\; dpy-21\; and prx-5 based on RNA-seq studies.	Affected by cep-1, dpy-21 and prx-5 according to RNA-seq.	N.A.
chrIV	14796964	14797450	487	2	178404	NM_001129349	WBGene00303007	Y57G11C.1147	Uncharacterized protein	WBGene00303007	Y57G11C.1147	Caenorhabditis elegans	protein_coding_gene	Y57G11C.1147	CELE_Y57G11C.1147	Y57G11C.1147.1, Y57G11C.1147.2, Y57G11C.1147.3	CEOP5614	CE41286	CE41286|HMMPANTHER:PTHR33668|INTERPRO:IPR033378	A5Z2X2	A5Z2X2	N.A.	NM_001380539.2	NP_001367161.1	IV 12.508570	N.A.	avoids bacterial lawn, chemical resistant, embryonic lethal, extended life span, foraging behavior variant, larval arrest, mRNA levels increased, no induction of antimicrobial peptide expression after infection, paraquat resistant, slow growth, sterile, transgene expression increased	N.A.	N.A.	N.A.	N.A.	DA neuron, I5 neuron, intestine, neuron, retrovesicular ganglion, SAB, VA neuron	N.A.	1-day post-L4 adult hermaphrodite Ce, 2-days post-L4 adult hermaphrodite Ce, 7-10 days post-L4 adult hermaphrodite Ce, adult Ce, adult hermaphrodite Ce, embryo Ce, L1 larva Ce, L3 larva Ce, L4 larva Ce	N.A.	HGNC:23057|Hieranoid;Panther;OrthoFinder;SonicParanoid;PhylomeDB;Inparanoid;OMA;OrthoInspector	actin filament organization, cytoplasm, cytoskeleton, protein-containing complex binding, SCAR complex	N.A.	Predicted to be involved in actin filament organization. Predicted to be located in cytoplasm and cytoskeleton. Predicted to be part of SCAR complex. Is an ortholog of human BRK1 (BRICK1 subunit of SCAR\/WAVE actin nucleating complex).	Enriched in I5 neuron, DA neuron, SAB, retrovesicular ganglion, intestine, VA neuron and neuron according to microarray. Affected by sir-2.1, fbf-1, tdp-1 and lin-35 according to microarray.	N.A.
chrI	111287	111436	150	2	13179128	NR_049901	WBGene00202494	F53G12.17	ncRNA	WBGene00202494	F53G12.17	Caenorhabditis elegans	ncRNA_gene	F53G12.17	CELE_F53G12.17	F53G12.17	N.A.	N.A.	N.A.	N.A.	N.A.	N.A.	NR_049901.1	N.A.	I -19.659180	N.A.	N.A.	N.A.	N.A.	N.A.	N.A.	N.A.	N.A.	N.A.	N.A.	N.A.	N.A.	N.A.	Is affected by cep-1 based on RNA-seq studies. Is affected by silicon dioxide nanoparticle based on microarray studies.	Affected by cep-1 according to RNA-seq. Affected by silicon dioxide nanoparticle according to microarray.	N.A.
chrIII	11008231	11008817	587	1	176531	NM_067014	WBGene00012964	Y48A6B.3	Putative H/ACA ribonucleoprotein complex subunit 2-like protein	WBGene00012964	Y48A6B.3	Caenorhabditis elegans	protein_coding_gene	Y48A6B.3	CELE_Y48A6B.3	Y48A6B.3.1	CEOP3712	CE19186	CE19186|HMMPANTHER:PTHR23105|HMMPANTHER:PTHR23105:SF129|PRINTS:PR00881|PRINTS:PR00883|SCANPROSITE:PS01082|PFAM:PF01248|SUPERFAMILY:SSF55315|INTERPRO:IPR002415|INTERPRO:IPR004038|INTERPRO:IPR018492|INTERPRO:IPR029064	Q9XXD4	Q9XXD4	TF105839	NM_067014.8	NP_499415.1	III 5.835950	N.A.	chemical hypersensitive, developmental delay postembryonic, organism hypersensitive ionizing radiation, pattern of transgene expression variant, receptor mediated endocytosis defective, slow growth	N.A.	gk716923|Substitution|Missense, gk835669|Substitution|Missense	hsp-16.2|Physical, nrde-2|Physical, sec-6|Physical, sip-1|Physical, smk-1|Physical, unc-119|Physical, zen-4|Physical	N.A.	AFD, ASER, germ line, M cell, somatic gonad precursor	N.A.	1-day post-L4 adult hermaphrodite Ce, 10-days post-L4 adult hermaphrodite Ce, 11-15 days post-L4 adult hermaphrodite Ce, 2-days post-L4 adult hermaphrodite Ce, 20-days post-L4 adult hermaphrodite Ce, 3-days post-L4 adult hermaphrodite Ce, 3-fold embryo Ce, 6-days post-L4 adult hermaphrodite Ce, 7-10 days post-L4 adult hermaphrodite Ce, adult Ce, adult hermaphrodite Ce, adult male Ce, all stages C…	autosomal recessive dyskeratosis congenita 2|By Orthology	HGNC:14377|EnsEMBL-Compara;Hieranoid;Panther;OrthoFinder;SonicParanoid;PhylomeDB;Inparanoid;OMA;OrthoInspector	box H/ACA snoRNA binding, box H/ACA snoRNP complex, cleavage involved in rRNA processing, maturation of LSU-rRNA, nucleolus, nucleus, ribonucleoprotein complex, ribosome biogenesis, RNA binding, rRNA processing, rRNA pseudouridine synthesis, sno(s)RNA-containing ribonucleoprotein complex, snRNA pseudouridine synthesis	N.A.	Predicted to enable box H\/ACA snoRNA binding activity. Predicted to be involved in ncRNA metabolic process. Predicted to be located in nucleolus. Predicted to be part of box H\/ACA snoRNP complex. Human ortholog(s) of this gene implicated in autosomal recessive dyskeratosis congenita 2. Is an ortholog of human NHP2 (NHP2 ribonucleoprotein).	Enriched in germ line, AFD, ASER, somatic gonad precursor and M cell according to proteomic study, RNA-seq and single-cell RNA-seq. Affected by rde-4, zfp-1, nhr-114, let-7, gld-1, tatn-1, drh-3, clk-1, crtc-1, aak-2, daf-2, daf-16, cox-5B, jmjd-3.1, jmjd-1.2, hsf-1, rbr-2, glp-1, dpy-21, glh-4, glh-1, pgl-1, pgl-3, lin-22, isp-1, nuo-6, pmt-2, pry-1, nhl-2, aak-1, spc-1, unc-70, ztf-11, iff-1, s…	WBPaper00027740|pmid16824923, WBPaper00028451|pmid16943775, WBPaper00031949|pmid18547420, WBPaper00038491|pmid21647448, WBPaper00041022|pmid22546897, WBPaper00049828|pmid27405932, WBPaper00055090|pmid30120140
chrII	9060040	9060060	21	2	13186344	NR_051504	WBGene00167037	21ur-14806	ncRNA	WBGene00167037	21ur-14806	Caenorhabditis elegans	piRNA_gene	T24B8.8	CELE_T24B8.8	T24B8.8	N.A.	N.A.	N.A.	N.A.	N.A.	N.A.	NR_051504.1	N.A.	II 1.00	N.A.	N.A.	N.A.	gk761408|Substitution|Missense	N.A.	N.A.	N.A.	N.A.	N.A.	N.A.	N.A.	N.A.	N.A.	Is affected by emr-1\; lem-2\; and rnp-6 based on RNA-seq studies.	Affected by emr-1, lem-2 and rnp-6 according to RNA-seq.	N.A.
chrIV	7313044	7313473	430	2	177503	NM_001306904	WBGene00004477	rps-8	40S ribosomal protein S8	WBGene00004477	rps-8	Caenorhabditis elegans	protein_coding_gene	F42C5.8	CELE_F42C5.8	F42C5.8a.1, F42C5.8b.1	N.A.	CE04561, CE49256	CE04561|PhosphoPep:F42C5.8a|HMMPANTHER:PTHR10394:SF3|HMMPANTHER:PTHR10394|SCANPROSITE:PS01193|TIGRFAM:TIGR00307|PFAM:PF01201|INTERPRO:IPR001047|INTERPRO:IPR022309, CE49256|HMMPANTHER:PTHR10394|PFAM:PF01201|INTERPRO:IPR001047|INTERPRO:IPR022309|INTERPRO:IPR042563	P48156, V6CM07	P48156	N.A.	NM_001383118.2, NM_001380319.1	NP_001368426.1, NP_001370387.1	IV 3.32	sjj_F42C5.8|IV-3L21, sjj_F42C5.1|IV-3L07, cenix:184-d8, mv_F42C5.8, WBPaper00038381:F42C5_1_1	apoptosis fails to occur, apoptosis reduced, avoids bacterial lawn, dead eggs laid, diplotene absent during oogenesis, early larval arrest, extended life span, fat content reduced, foraging behavior variant, germ cell compartment expansion absent, germ cell compartment expansion variant, gonad development variant, gonad small, L1 arrest, larval arrest, lethal, maternal sterile, no oocytes, nuclei…	N.A.	gk205268|Substitution|Missense	cacn-1|Physical, cep-1|Genetic, cfp-1|Physical, csr-1|Physical, erh-2|Physical, glh-1|Physical, hsp-60|Regulatory, hsp-6|Regulatory, icd-1|Physical, lec-1|Physical, myrf-1|Physical, myrf-2|Physical, nrde-2|Physical, pan-1|Physical, pid-2|Physical, pid-3|Physical, pid-5|Physical, prg-1|Physical, rpb-9|Physical, sec-6|Physical, sip-1|Physical, smo-1|Physical, spc-1|Physical, tofu-6|Physical, tost-1…	N.A.	anterior gonadal sheath cell, anterior spermatheca, CAN, excretory cell, excretory gland cell, germ line, hermaphrodite distal tip cell, M cell, m2L, m2R, male distal tip cell, posterior gonadal sheath cell, Posterior spermatheca, Psub1, RIG, somatic gonad precursor	N.A.	1-day post-L4 adult hermaphrodite Ce, 10-days post-L4 adult hermaphrodite Ce, 11-15 days post-L4 adult hermaphrodite Ce, 14-days post-L4 adult hermaphrodite Ce, 15-days post-L4 adult hermaphrodite Ce, 16-18 days post-L4 adult hermaphrodite Ce, 2-cell embryo Ce, 2-days post-L4 adult hermaphrodite Ce, 20-days post-L4 adult hermaphrodite Ce, 3-days post-L4 adult hermaphrodite Ce, 5-days post-L4 adul…	N.A.	HGNC:10441|EnsEMBL-Compara;Hieranoid;Panther;OrthoFinder;SonicParanoid;PhylomeDB;Inparanoid;OMA;OrthoInspector	cytosolic small ribosomal subunit, maturation of SSU-rRNA from tricistronic rRNA transcript (SSU-rRNA, 5.8S rRNA, LSU-rRNA), ribonucleoprotein complex, ribosome, structural constituent of ribosome, translation	rps-8 encodes a small ribosomal subunit S8 protein\; by homology, RPS-8 is predicted to function in protein biosynthesis\; in C. elegans, RPS-8 activity is required for germline development and the overall health of the animal.	Predicted to be a structural constituent of ribosome. Predicted to be involved in maturation of SSU-rRNA from tricistronic rRNA transcript (SSU-rRNA, 5.8S rRNA, LSU-rRNA). Predicted to be located in ribosome. Predicted to be part of cytosolic small ribosomal subunit. Is an ortholog of human RPS8 (ribosomal protein S8).	Enriched in Psub1, germ line, somatic gonad precursor, excretory cell, M cell, CAN, hermaphrodite distal tip cell, male distal tip cell, excretory gland cell, anterior gonadal sheath cell, posterior gonadal sheath cell, m2R, m2L, RIG, anterior spermatheca and Posterior spermatheca according to RNA-seq and single-cell RNA-seq. Affected by atx-3, daf-2, daf-16, lec-1, pept-1, dep-1, glh-4, glh-1, p…	WBPaper00025088|pmid15837805, WBPaper00029254|pmid17411345, WBPaper00032961|pmid19264959, WBPaper00035215|pmid19763173, WBPaper00035228|pmid19805813, WBPaper00037615|pmid20858264, WBPaper00038491|pmid21647448, WBPaper00049828|pmid27405932, WBPaper00055090|pmid30120140
chrIII	9467469	9467793	325	1	176330	NM_066684	WBGene00000235	baf-1	Barrier-to-autointegration factor 1	WBGene00000235	baf-1	Caenorhabditis elegans	protein_coding_gene	B0464.7	3J557, pna-1, pna-1, CELE_B0464.7	B0464.7.1	CEOP3588	CE26704	CE26704|HMMPANTHER:PTHR47507|SMART:SM01023|PFAM:PF02961|SUPERFAMILY:SSF47798|INTERPRO:IPR004122|INTERPRO:IPR036617	Q03565	Q03565	TF315060	NM_001392176.1	NP_001379048.1	III 0.56 +/- 0.01	mv_G_YK5313, sjj2_B0464.7.1|III-8H21, cenix:173-g2	chromosome segregation variant, embryonic lethal, germ cell development variant, gonad development variant, lethal, locomotion variant, male gonad development variant, male somatic gonad development variant, no oocytes, nuclear envelope assembly variant early emb, nuclear morphology variation early emb, organism morphology variant, pattern of transgene expression variant, pronuclear envelope defe…	chromosome segregation variant, embryonic lethal, lethal, nuclear envelope assembly variant early emb, nuclear morphology variation early emb, pronuclear envelope defective early emb, pronuclear nuclear appearance defective early emb, pronuclear nuclear appearance variant emb, protein phosphorylation reduced, protein subcellular localization variant, sterile	gk182179|Substitution|Missense, gk485076|Substitution|Missense, t1499|Substitution|Missense, t1639|Substitution|Missense	lmn-1|Physical;Regulatory, vrk-1|Physical;Regulatory, ccar-1|Physical, csr-1|Physical, daf-16|Physical, eff-1|Regulatory, emr-1|Physical, glh-1|Physical, lem-2|Physical, lem-4|Physical, let-92|Regulatory, prg-1|Physical, zen-4|Physical	gonad	ABalpppppp, ABplaapaap, ABpraaappp, ABpraapaap, AFD, body wall muscle cell, germ line, hypodermis, I4 neuron, intestine, NSM, OLL, PVD, sensory neuron, VB1	N.A.	1-day post-L4 adult hermaphrodite Ce, 10-days post-L4 adult hermaphrodite Ce, 11-15 days post-L4 adult hermaphrodite Ce, 2-days post-L4 adult hermaphrodite Ce, 20-days post-L4 adult hermaphrodite Ce, 3-days post-L4 adult hermaphrodite Ce, 3-fold embryo Ce, 4-days post-L4 adult hermaphrodite Ce, 6-days post-L4 adult hermaphrodite Ce, 7-10 days post-L4 adult hermaphrodite Ce, adult Ce, adult hermap…	muscular dystrophy|By Experiment	HGNC:17397|EnsEMBL-Compara;Hieranoid;OrthoFinder;SonicParanoid;Inparanoid;OMA;OrthoInspector	cellular response to DNA damage stimulus, chromosome condensation, chromosome organization, chromosome segregation, condensed chromosome, condensed chromosome, centromeric region, cytoplasm, DNA binding, DNA repair, double-stranded DNA binding, embryo development ending in birth or egg hatching, identical protein binding, nuclear envelope, nucleoplasm, nucleus, protein binding, response to X-ray	baf-1 encodes a small, novel protein that is highly conserved amongst metazoa\; BAF-1 binds double-stranded DNA nonspecifically in vitro and is essential for proper chromosome segregation, embryogenesis, and gonad development in vivo\; biochemical and phenotypic analyses suggest that BAF-1 functions as an intramolecular bridge that mediates nuclear assembly and chromatin capture by the reforming …	Predicted to enable double-stranded DNA binding activity and identical protein binding activity. Involved in several processes, including chromosome segregation\; embryo development\; and response to X-ray. Located in condensed chromosome, centromeric region\; cytoplasm\; and nucleus. Used to study muscular dystrophy. Human ortholog(s) of this gene implicated in progeria. Is an ortholog of human …	Enriched in body wall muscle cell, hypodermis, intestine, PVD, OLL, NSM, AFD, germ line, sensory neuron, ABpraaappp, ABalpppppp, ABpraapaap, ABplaapaap, I4 neuron and VB1 according to tiling array, RNA-seq and single-cell RNA-seq. Affected by alg-1, lin-15B, prp-8, let-7, gld-1, tatn-1, clk-1, daf-16, swsn-2.2, sma-2, sma-4, daf-2, nuo-6, eat-2, ints-1, rpl-33, rpl-5, sek-1, smn-1, unc-70, ints-4…	WBPaper00003469|pmid10085292, WBPaper00004269|pmid10908652, WBPaper00024974|pmid15728376, WBPaper00027235|pmid18050484, WBPaper00027371|pmid N.A., WBPaper00027532|pmid N.A., WBPaper00028895|pmid17170708, WBPaper00030590|pmid N.A., WBPaper00030942|pmid17698609, WBPaper00036811|pmid N.A., WBPaper00038491|pmid21647448, WBPaper00040826|pmid22383942, WBPaper00041279|pmid22770216, WBPaper00041771|pmid2…
chrIII	9781254	9781763	510	1	176383	NM_066764	WBGene00006910	vha-1	V-type proton ATPase 16 kDa proteolipid subunit 1	WBGene00006910	vha-1	Caenorhabditis elegans	protein_coding_gene	R10E11.8	CELE_R10E11.8	R10E11.8.1	CEOP3620	CE06291	CE06291|HMMPANTHER:PTHR10263|HMMPANTHER:PTHR10263:SF5|PRINTS:PR00122|TIGRFAM:TIGR01100|PFAM:PF00137|SUPERFAMILY:SSF81333|INTERPRO:IPR000245|INTERPRO:IPR002379|INTERPRO:IPR011555|INTERPRO:IPR035921	Q21898	Q21898	TF300025	NM_066764.7	NP_499165.1	III 1.03 +/- 0.01	sjj_R10E11.8|III-5A20, mv_R10E11.8, TH:324C5, cenix:324-c5	accumulated germline cell corpses, alae absent, apoptosis variant, avoids bacterial lawn, cell membrane organization biogenesis variant, chromosome condensation variant, diakinesis progression during oogenesis variant, diplotene region organization variant, embryonic lethal, excretory canal morphology variant, germ cell compartment anucleate, germ cell compartment expansion variant, germ cell com…	N.A.	gk182786|Substitution|Missense, gk432192|Substitution|Missense, gk465255|Substitution|Missense, gk955836|Substitution|Missense	cdc-42|Physical, cdc-48.2|Genetic, ckb-2|Regulatory, dlg-1|Physical, hsp-4|Regulatory, hsp-60|Regulatory, hsp-6|Regulatory, let-413|Physical, mafr-1|Physical, pept-1|Regulatory, smo-1|Physical	excretory cell, intestine, rectum	AIZ, excretory cell, head mesodermal cell, intestine, NSM, PVW, sensory neuron	all stages Ce, embryo Ce, larva Ce	1-cell embryo Ce, 1-day post-L4 adult hermaphrodite Ce, 10-days post-L4 adult hermaphrodite Ce, 20-days post-L4 adult hermaphrodite Ce, 3-days post-L4 adult hermaphrodite Ce, 3-fold embryo Ce, 4-days post-L4 adult hermaphrodite Ce, 6-days post-L4 adult hermaphrodite Ce, adult Ce, adult hermaphrodite Ce, all stages Ce, blastula embryo Ce, dauer larva Ce, embryo Ce, L1 larva Ce, L2 larva Ce, L2d la…	thyroid gland carcinoma|By Orthology	HGNC:855|Hieranoid;Panther;OrthoFinder;SonicParanoid;PhylomeDB;Inparanoid;OMA;OrthoInspector	embryo development ending in birth or egg hatching, integral component of membrane, ion transport, lysosomal lumen acidification, membrane raft, membrane, ovulation, proton transmembrane transport, proton transmembrane transporter activity, proton-transporting ATPase activity, rotational mechanism, proton-transporting two-sector ATPase complex, proton-transporting domain, proton-transporting V-ty…	vha-1 encodes an ortholog of subunit c of the membrane-bound (V0) domainof vacuolar proton-translocating ATPase (V-ATPase)\; VHA-1 is a predictedV-ATPase transmembrane rotor component\; VHA-1 and VHA-2\/3 comprise aclosely related family of subunit c co-orthologs, predicted to carryprotons from the cytosol to a-subunits (VHA-5, VHA-6, VHA-7, or UNC-32)for transmembrane export\; VHA-1, like VHA-12…	Predicted to enable proton-transporting ATPase activity, rotational mechanism. Involved in several processes, including lysosomal lumen acidification\; ovulation\; and regulation of syncytium formation by plasma membrane fusion. Located in membrane raft. Expressed in excretory cell and rectum. Human ortholog(s) of this gene implicated in thyroid gland carcinoma. Is an ortholog of human ATP6V0C (A…	Enriched in excretory cell, NSM, head mesodermal cell, sensory neuron, AIZ, PVW and intestine according to tiling array, RNA-seq, single-cell RNA-seq and microarray. Affected by sma-2, daf-12, let-7, gld-1, npr-1, cox-5B, jmjd-3.1, hsf-1, mir-34, emb-4, sma-4, smg-2, smo-1, nhl-2, atf-7, aak-1, aak-2, smn-1, mrps-5, set-6, baz-2, egl-43, rnp-6, unc-30, fbf-1, lin-54, tdp-1 and hlh-25 according to…	WBPaper00002899|pmid9305897, WBPaper00003195|pmid9712884, WBPaper00003306|pmid9862485, WBPaper00004341|pmid10846178, WBPaper00004617|pmid11171402, WBPaper00004842|pmid11441002, WBPaper00005485|pmid12441252, WBPaper00011821|pmid N.A., WBPaper00011885|pmid N.A., WBPaper00018266|pmid N.A., WBPaper00019619|pmid N.A., WBPaper00026591|pmid15866168, WBPaper00035475|pmid19921263, WBPaper00036659|pmid2063…
chrI	10567934	10568963	1030	1	172943	NM_060365	WBGene00004408	rla-0	60S acidic ribosomal protein P0	WBGene00004408	rla-0	Caenorhabditis elegans	protein_coding_gene	F25H2.10	rpa-0, CELE_F25H2.10	F25H2.10.1	CEOP1624	CE09655	CE09655|PhosphoPep:F25H2.10|HMMPANTHER:PTHR45699|HMMPANTHER:PTHR45699:SF3|PIRSF:PIRSF039087|PFAM:PF00466|PFAM:PF00428|PFAM:PF17777|SUPERFAMILY:SSF160369|INTERPRO:IPR001790|INTERPRO:IPR030670|INTERPRO:IPR040637|INTERPRO:IPR043141|INTERPRO:IPR043164	Q93572	Q93572	TF300849	NM_060365.11	NP_492766.1	I 5.06 +/- 0.00	sjj_F25H2.10|I-5G04, cenix:74-g6, mv_F25H2.10	apoptosis reduced, avoids bacterial lawn, cell membrane organization biogenesis variant, chromosome condensation variant, cytoplasmic processing body variant, diplotene absent during oogenesis, diplotene region organization variant, embryo osmotic integrity defective early emb, embryonic lethal, extended life span, foraging behavior variant, germ cell compartment expansion variant, germ cell comp…	lethal, sterile	gk940289|Deletion|Inframe_deletion, tm5980|Deletion|Frameshift, gk120924|Substitution|Missense, gk120925|Substitution|Missense, gk120926|Substitution|Missense, gk356202|Substitution|Missense, gk410460|Substitution|Missense, gk568745|Substitution|Missense, gk574339|Substitution|Missense, gk615335|Substitution|Missense, gk625738|Substitution|Missense, gk678327|Substitution|Missense, gk749700|Substi…	bir-1|Physical, C37A2.7|Physical, cacn-1|Physical, csr-1|Physical, erh-2|Physical, gck-1|Physical, glh-1|Physical, icd-1|Physical, lin-10|Physical, magi-1|Physical, myrf-1|Physical, myrf-2|Physical, nrde-2|Physical, pan-1|Physical, pid-3|Physical, pqn-59|Physical, prg-1|Physical, rla-1|Physical, sip-1|Physical, smo-1|Physical, spc-1|Physical, tebp-1|Physical, tebp-2|Physical, tofu-6|Physical, tos…	anal depressor muscle, body wall musculature, intestine, nervous system, neuron, pharynx, tail	anterior spermatheca, AS1, AS10, AS11, AS2, AS3, AS4, AS5, AS6, AS7, AS8, AS9, DA1, DA2, DA3, DA4, DA5, DA6, DA7, DA8, DA9, DB1, DB2, DB3, DB4, DB5, DB6, DB7, excretory cell, germ line, hermaphrodite distal tip cell, hypodermis, I2L, I2R, I3 neuron, I4 neuron, M cell, M1 neuron, m2L, m2R, m3L, m3R, M5 neuron, male distal tip cell, MCL, MCR, MI neuron, OLL, PDB, Posterior spermatheca, PVC, PVD, so…	adult Ce, larva Ce	1-cell embryo Ce, 1-day post-L4 adult hermaphrodite Ce, 11-15 days post-L4 adult hermaphrodite Ce, 14-days post-L4 adult hermaphrodite Ce, 15-days post-L4 adult hermaphrodite Ce, 16-18 days post-L4 adult hermaphrodite Ce, 2-days post-L4 adult hermaphrodite Ce, 3-days post-L4 adult hermaphrodite Ce, 5-days post-L4 adult hermaphrodite Ce, 6-days post-L4 adult hermaphrodite Ce, 7-10 days post-L4 adu…	N.A.	HGNC:10371|EnsEMBL-Compara;Hieranoid;Panther;OrthoFinder;SonicParanoid;PhylomeDB;Inparanoid;OMA;OrthoInspector, HGNC:36404|EnsEMBL-Compara;Hieranoid;Panther;OrthoFinder;SonicParanoid;PhylomeDB;Inparanoid;OMA;OrthoInspector	cytoplasmic translation, cytosolic large ribosomal subunit, large ribosomal subunit rRNA binding, ribonucleoprotein complex, ribosomal large subunit assembly, ribosome biogenesis, ribosome, structural constituent of ribosome	rpa-0 encodes an acidic ribosomal subunit protein P0.	Predicted to enable large ribosomal subunit rRNA binding activity. Predicted to be a structural constituent of ribosome. Predicted to be involved in cytoplasmic translation and ribosomal large subunit assembly. Predicted to be located in ribosome. Predicted to be part of cytosolic large ribosomal subunit. Expressed in tail. Is an ortholog of human RPLP0 (ribosomal protein lateral stalk subunit P0…	Enriched in hypodermis, PVD, OLL, germ line, somatic gonad precursor, excretory cell, M cell, AS11, AS10, AS9, AS8, AS7, AS6, AS5, AS4, AS3, AS2, AS1, DA9, DA8, DA7, DA6, DA5, DA4, DA3, DA2, DA1, DB1, DB7, DB6, DB5, DB4, DB3, DB2, hermaphrodite distal tip cell, male distal tip cell, I2R, I2L, I3 neuron, I4 neuron, M1 neuron, m2R, m2L, m3R, m3L, M5 neuron, MCR, MCL, MI neuron, PDB, PVC, anterior s…	WBPaper00005697|pmid12560808, WBPaper00026640|pmid15996007, WBPaper00028360|pmid16897684, WBPaper00033090|pmid19381582, WBPaper00038491|pmid21647448, WBPaper00041022|pmid22546897, WBPaper00044448|pmid24218109, WBPaper00049828|pmid27405932, WBPaper00055090|pmid30120140, WBPaper00062388|pmid35036864
chrII	11635225	11635327	103	1	24105279	NR_101752	WBGene00220236	ZK20.9	ncRNA	WBGene00220236	ZK20.9	Caenorhabditis elegans	snoRNA_gene	ZK20.9	cel-inc162, CELE_ZK20.9	ZK20.9	N.A.	N.A.	N.A.	N.A.	N.A.	N.A.	NR_101752.1	N.A.	II 3.796348	N.A.	N.A.	N.A.	N.A.	N.A.	N.A.	N.A.	N.A.	N.A.	N.A.	N.A.	N.A.	N.A.	Is affected by several genes including set-2\; dlc-1\; and adr-2 based on RNA-seq studies. Is affected by atracurium based on RNA-seq studies.	Affected by adr-2, dlc-1, ints-4 and set-2 according to RNA-seq. Affected by atracurium according to RNA-seq.	N.A.
chrI	5484830	5485593	764	2	172201	NM_059207	WBGene00004431	rpl-19	60S ribosomal protein L19	WBGene00004431	rpl-19	Caenorhabditis elegans	protein_coding_gene	C09D4.5	CELE_C09D4.5	C09D4.5.1, C09D4.5.2	CEOP1252	CE08034	CE08034|PhosphoPep:C09D4.5|HMMPANTHER:PTHR10722|SCANPROSITE:PS00526|SMART:SM01416|PFAM:PF01280|SUPERFAMILY:SSF48140|INTERPRO:IPR000196|INTERPRO:IPR015972|INTERPRO:IPR035970|INTERPRO:IPR039547	O02639	O02639	TF313598	NM_059207.9	NP_491608.1	I 0.03 +/- 0.00	WBPaper00038381:C09D4_1_1, sjj_C09D4.5|I-2B19, mv_C09D4.5, cenix:226-d4	apoptosis fails to occur, apoptosis reduced, cell membrane organization biogenesis variant, chromosome condensation variant, dead eggs laid, diplotene absent during oogenesis, diplotene region organization variant, embryonic lethal, embryonic terminal arrest variable emb, extended life span, germ cell compartment expansion variant, germ cell compartment morphology variant, gonad migration variant…	N.A.	gk111252|Substitution|Missense, gk560995|Substitution|Missense, gk682453|Substitution|Missense, gk932875|Substitution|Missense	cacn-1|Physical, csr-1|Physical, eftu-2|Physical, glh-1|Physical, hsp-6|Regulatory, lin-10|Physical, mars-1|Physical, myrf-1|Physical, myrf-2|Physical, nrde-2|Physical, pan-1|Physical, pid-3|Physical, pqn-59|Physical, prg-1|Physical, rpl-43|Physical, rpn-11|Physical, sart-3|Physical, sec-6|Physical, sftb-1|Physical, sip-1|Physical, smo-1|Physical, spc-1|Physical, tofu-6|Physical, usip-1|Physical,…	body wall musculature, excretory cell, head neuron, nervous system, neuron, pharynx, reproductive system, tail neuron, ventral cord neuron, vulval muscle	AIZ, AVB, body wall musculature, dorsal nerve cord, germ line, hermaphrodite distal tip cell, IL2DL, IL2DR, IL2VL, IL2VR, intestine, lateral nerve cord, M cell, m2L, m2R, male distal tip cell, MI neuron, nerve ring, pharynx, SIA, SIB, somatic gonad precursor, somatic neuron, tail neuron, VB1, VB2, ventral nerve cord, vulval muscle	adult Ce, larva Ce	1-day post-L4 adult hermaphrodite Ce, 10-days post-L4 adult hermaphrodite Ce, 11-15 days post-L4 adult hermaphrodite Ce, 2-days post-L4 adult hermaphrodite Ce, 20-days post-L4 adult hermaphrodite Ce, 3-days post-L4 adult hermaphrodite Ce, 6-days post-L4 adult hermaphrodite Ce, adult Ce, adult hermaphrodite Ce, adult male Ce, all stages Ce, blastula embryo Ce, dauer larva Ce, embryo Ce, L1 larva C…	N.A.	HGNC:10312|EnsEMBL-Compara;Hieranoid;Panther;OrthoFinder;SonicParanoid;PhylomeDB;Inparanoid;OMA;OrthoInspector	cytosolic large ribosomal subunit, determination of adult lifespan, ribonucleoprotein complex, ribosome, RNA binding, structural constituent of ribosome, translation	rpl-19 encodes a large ribosomal subunit L19 protein.	Predicted to enable RNA binding activity. Predicted to be a structural constituent of ribosome. Involved in determination of adult lifespan. Predicted to be located in ribosome. Predicted to be part of cytosolic large ribosomal subunit. Is an ortholog of human RPL19 (ribosomal protein L19).	Enriched in ventral nerve cord, body wall musculature, vulval muscle, nerve ring, dorsal nerve cord, somatic neuron, tail neuron, lateral nerve cord, pharynx, germ line, somatic gonad precursor, M cell, AIZ, AVB, hermaphrodite distal tip cell, male distal tip cell, IL2VR, IL2VL, IL2DR, IL2DL, m2R, m2L, MI neuron, SIA, SIB, VB1, VB2 and intestine according to Chronogram analysis, RNA-seq, single-c…	WBPaper00004402|pmid11099033, WBPaper00025088|pmid15837805, WBPaper00029008|pmid17266679, WBPaper00029435|pmid17521386, WBPaper00038491|pmid21647448, WBPaper00049828|pmid27405932, WBPaper00055090|pmid30120140
chrV	4347198	4349544	2347	1	178831	NM_071798	WBGene00003159	mcm-7	DNA replication licensing factor MCM7	WBGene00003159	mcm-7	Caenorhabditis elegans	protein_coding_gene	F32D1.10	CELE_F32D1.10	F32D1.10.1	N.A.	CE09874	CE09874|HMMPANTHER:PTHR11630|HMMPANTHER:PTHR11630:SF26|PFSCAN:PS50051|PRINTS:PR01663|PRINTS:PR01657|SCANPROSITE:PS00847|SMART:SM00382|SMART:SM00350|PFAM:PF00493|PFAM:PF17855|PFAM:PF14551|PFAM:PF17207|SUPERFAMILY:SSF52540|SUPERFAMILY:SSF50249|INTERPRO:IPR001208|INTERPRO:IPR003593|INTERPRO:IPR008050|INTERPRO:IPR012340|INTERPRO:IPR027417|INTERPRO:IPR027925|INTERPRO:IPR031327|INTERPRO:IPR033762|INTER…	O16297	O16297	TF300400	NM_071798.9	NP_504199.1	V -5.85 +/- 0.01	sjj_F32D1.10|V-3N07, mv_F32D1.10, cenix:10-d3	cell cycle slow early emb, distal tip cell migration variant, embryonic lethal, exaggerated asynchrony early emb, extended life span, hydroxyurea hypersensitive, lethal, locomotion variant, maternal sterile, multiple nuclei early emb, nuclear envelope assembly variant early emb, organism morphology variant, protruding vulva, sister chromatid segregation defective early emb, sterile	N.A.	gk232726|Substitution|Missense, gk232729|Substitution|Missense, gk341759|Substitution|Missense, gk389900|Substitution|Missense, gk419256|Substitution|Missense, gk435290|Substitution|Missense, gk452379|Substitution|Missense, gk458256|Substitution|Missense, gk464240|Substitution|Missense, gk658069|Substitution|Missense, gk681767|Substitution|Missense, gk716024|Substitution|Missense, gk843559|Substi…	arcp-1|Physical, cfp-1|Physical, csr-1|Physical, daf-15|Physical, dep-1|Physical, glh-1|Physical, hda-1|Physical, hmg-3|Physical, mcm-3|Physical, prg-1|Physical, psf-1|Physical, rde-8|Physical, sec-6|Physical, sld-5|Physical, smo-1|Physical	body region, body wall musculature, head, intestine, pharynx, tail	ABalaapppp, ABalapaapp, ABalapapap, ABalapppaa, ABalapppap, ABalappppa, ABalpappaa, ABalppappa, ABalppappp, ABalpppapa, ABalpppppp, ABalppppppp, ABarapapaa, ABarappppa, ABarappppp, ABarpaaa, ABplaapaap, ABplapaaaa, ABplapaaap, ABplapappp, ABplapppapp, ABplpaaapp, ABplpaappa, ABplpappaa, ABplppppap, ABpraaaapa, ABpraaappp, ABpraaapppp, ABpraapaap, ABprapaaaa, ABprapaaap, ABprapappp, ABprapppapp, A…	adult Ce, larva Ce	1-cell embryo Ce, 1-day post-L4 adult hermaphrodite Ce, 10-days post-L4 adult hermaphrodite Ce, 11-15 days post-L4 adult hermaphrodite Ce, 2-days post-L4 adult hermaphrodite Ce, 20-days post-L4 adult hermaphrodite Ce, 3-days post-L4 adult hermaphrodite Ce, 3-fold embryo Ce, 4-days post-L4 adult hermaphrodite Ce, 5-days post-L4 adult hermaphrodite Ce, 6-days post-L4 adult hermaphrodite Ce, 7-10 da…	hepatocellular carcinoma|By Orthology, pancreatic ductal carcinoma|By Orthology	HGNC:6950|Hieranoid;Panther;OrthoFinder;SonicParanoid;PhylomeDB;Inparanoid;OMA;OrthoInspector	ATP binding, ATP hydrolysis activity, cell cycle, DNA binding, DNA duplex unwinding, DNA helicase activity, DNA replication initiation, DNA replication, DNA strand elongation involved in DNA replication, DNA unwinding involved in DNA replication, double-strand break repair via break-induced replication, embryo development ending in birth or egg hatching, helicase activity, hydrolase activity, int…	mcm-7 encodes the C. elegans ortholog of the MCM7 member of the MCM complex, a hexameric protein complex required for the initiation and regulation of DNA replication.	Predicted to enable single-stranded DNA binding activity. Predicted to contribute to single-stranded DNA helicase activity. Involved in MCM complex assembly\; embryo development\; and mitotic sister chromatid segregation. Predicted to be located in nucleus. Predicted to be part of MCM complex. Expressed in head\; intestine\; and tail. Human ortholog(s) of this gene implicated in hepatocellular ca…	Enriched in germ line, intestine, head mesodermal cell, ABarpaaa, ABplapaaaa, ABprapaaaa, body wall muscle cell, ADF, ADL, AFD, ASE, ASG, ASH, ASI, ASJ, ASK, AWA, AWB, AWC, AQR, PVR, PQR, IL2 neuron, IL1 neuron, CEP, ADE, PDE, BAG, FLP, OLL, OLQ, PHA, PHB, ABplpappaa, ABarapapaa, ABalpappaa, MSpaapaa, ABalpppapa, ABpraaaapa, ABprapaaap, ABplapaaap, ABalapppaa, ABpraaappp, ABalpppppp, ABprpaappa, …	WBPaper00004849|pmid11533717, WBPaper00026640|pmid15996007, WBPaper00026722|pmid16094371, WBPaper00027664|pmid16754955, WBPaper00030767|pmid17568563, WBPaper00033090|pmid19381582, WBPaper00035228|pmid19805813, WBPaper00038491|pmid21647448, WBPaper00040521|pmid22152485, WBPaper00040645|pmid22249291, WBPaper00045289|pmid24841566, WBPaper00052102|pmid N.A., WBPaper00055090|pmid30120140, WBPaper00061…
chrI	8815600	8816185	586	2	172693	NM_059983	WBGene00004484	rps-15	40S ribosomal protein S15	WBGene00004484	rps-15	Caenorhabditis elegans	protein_coding_gene	F36A2.6	CELE_F36A2.6	F36A2.6.1	N.A.	CE09945	CE09945|HMMPANTHER:PTHR11880|HMMPANTHER:PTHR11880:SF2|PIRSF:PIRSF002144|PRINTS:PR00975|SCANPROSITE:PS00323|TIGRFAM:TIGR01025|PFAM:PF00203|SUPERFAMILY:SSF54570|INTERPRO:IPR002222|INTERPRO:IPR005713|INTERPRO:IPR023575	Q9XVP0	Q9XVP0	TF318650	NM_059983.8	NP_492384.1	I 3.20 +/- 0.01	sjj_F36A2.6|I-4I20, cenix:33-a2, WBPaper00038381:F36A2_1_1, mv_F36A2.6	apoptosis reduced, developmental delay postembryonic, diplotene absent during oogenesis, early larval arrest, embryonic lethal, extended life span, foraging behavior variant, germ cell compartment expansion absent, germ cell compartment expansion variant, larval arrest, larval lethal, lysosome-related organelle morphology variant, maternal sterile, no oocytes, nuclei small, oocyte number decrease…	N.A.	gk117559|Substitution|Missense, gk117560|Substitution|Missense, gk426892|Substitution|Missense, gk860434|Substitution|Missense, gk866540|Substitution|Missense, gk931352|Substitution|Missense	abu-15|Physical, alg-1|Physical, bcf-1|Physical, cacn-1|Physical, cep-1|Genetic, cfp-1|Physical, chd-1|Physical, csn-5|Physical, csr-1|Physical, erh-2|Physical, F56B3.2|Physical, glh-1|Physical, glp-1|Physical, hmg-3|Physical, hrde-1|Physical, icd-1|Physical, lec-1|Physical, lev-11|Physical, mig-6|Physical, myrf-1|Physical, myrf-2|Physical, nmad-1|Physical, nrde-2|Physical, pan-1|Physical, pdi-2|…	N.A.	ADA, ADE, AFD, anterior gonadal sheath cell, anterior spermatheca, ASER, C, CAN, excretory gland cell, germ line, hermaphrodite distal tip cell, I4 neuron, M cell, m2L, m2R, male distal tip cell, MCL, MCR, neuron, NSM, PLM, posterior gonadal sheath cell, Posterior spermatheca, RIG, RIH, somatic gonad precursor	N.A.	1-day post-L4 adult hermaphrodite Ce, 10-days post-L4 adult hermaphrodite Ce, 14-days post-L4 adult hermaphrodite Ce, 15-days post-L4 adult hermaphrodite Ce, 16-18 days post-L4 adult hermaphrodite Ce, 2-days post-L4 adult hermaphrodite Ce, 20-days post-L4 adult hermaphrodite Ce, 3-days post-L4 adult hermaphrodite Ce, 3-fold embryo Ce, 4-cell embryo Ce, 5-days post-L4 adult hermaphrodite Ce, 6-day…	N.A.	HGNC:10388|EnsEMBL-Compara;Hieranoid;Panther;OrthoFinder;SonicParanoid;PhylomeDB;Inparanoid;OMA;OrthoInspector	cytosolic small ribosomal subunit, determination of adult lifespan, ribonucleoprotein complex, ribosomal small subunit assembly, ribosome, small ribosomal subunit, structural constituent of ribosome, translation	rps-15 encodes a small ribosomal subunit S15 protein.	Predicted to be a structural constituent of ribosome. Involved in determination of adult lifespan. Predicted to be located in ribosome. Predicted to be part of cytosolic small ribosomal subunit. Is an ortholog of human RPS15 (ribosomal protein S15).	Enriched in C, AFD, ASER, PLM, germ line, somatic gonad precursor, M cell, ADA, ADE, CAN, hermaphrodite distal tip cell, male distal tip cell, excretory gland cell, anterior gonadal sheath cell, posterior gonadal sheath cell, I4 neuron, m2R, m2L, MCR, MCL, NSM, RIG, RIH, anterior spermatheca, Posterior spermatheca and neuron according to RNA-seq, single-cell RNA-seq and microarray. Affected by sm…	WBPaper00028335|pmid16873502, WBPaper00029008|pmid17266679, WBPaper00035215|pmid19763173, WBPaper00038491|pmid21647448, WBPaper00049828|pmid27405932, WBPaper00055090|pmid30120140
chrV	1264510	1264561	52	1	13211605	NR_068600	WBGene00198782	C39F7.7	ncRNA	WBGene00198782	C39F7.7	Caenorhabditis elegans	ncRNA_gene	C39F7.7	CELE_C39F7.7	C39F7.7	N.A.	N.A.	N.A.	N.A.	N.A.	N.A.	NR_068600.1	N.A.	V -19.845770	N.A.	N.A.	N.A.	N.A.	N.A.	N.A.	N.A.	N.A.	N.A.	N.A.	N.A.	N.A.	N.A.	Is affected by hrpr-1 and eat-2 based on RNA-seq and microarray studies.	Affected by hrpr-1 and eat-2 according to RNA-seq and microarray.	N.A.
chrII	12679036	12679328	293	1	174898	NM_064306	WBGene00012602	Y38E10A.24	Uncharacterized protein	WBGene00012602	Y38E10A.24	Caenorhabditis elegans	protein_coding_gene	Y38E10A.24	CELE_Y38E10A.24	Y38E10A.24.1	N.A.	N.A.	N.A.	Q9NAI7	Q9NAI7	N.A.	NM_064306.7	NP_496707.1	II 10.690770	N.A.	clear, dauer lifespan extended, embryonic lethal, growth rate variant, larval arrest, lethal, reduced brood size, sick, slow growth, sterile, transgene expression increased	N.A.	gk345620|Substitution|Missense	hsp-16.2|Regulatory, hsp-4|Regulatory, hsp-60|Regulatory, hsp-6|Regulatory	N.A.	AFD, ASER, DA neuron, I5 neuron, neuron, NSM, PLM, retrovesicular ganglion, SAB, VA neuron	N.A.	1-day post-L4 adult hermaphrodite Ce, 2-days post-L4 adult hermaphrodite Ce, 3-days post-L4 adult hermaphrodite Ce, 3-fold embryo Ce, 6-days post-L4 adult hermaphrodite Ce, 7-10 days post-L4 adult hermaphrodite Ce, adult Ce, adult hermaphrodite Ce, adult male Ce, all stages Ce, blastula embryo Ce, embryo Ce, L1 larva Ce, L2 larva Ce, L2d larva Ce, L3 larva Ce, L4 larva Ce	N.A.	N.A.	N.A.	N.A.	Enriched in neurons and retrovesicular ganglion based on RNA-seq and microarray studies. Is affected by several genes including daf-16\; daf-12\; and npr-1 based on microarray\; tiling array\; and RNA-seq studies. Is affected by nine chemicals including aldicarb\; hydrogen sulfide\; and rotenone based on microarray and RNA-seq studies.	Enriched in NSM, AFD, ASER, PLM, I5 neuron, DA neuron, SAB, retrovesicular ganglion, VA neuron and neuron according to RNA-seq and microarray. Affected by isp-1, daf-12, lin-35, daf-16, npr-1, cox-5B, jmjd-3.1, jmjd-1.2, mir-34, sma-2, sma-4, lin-22, nuo-6, cfp-1, henn-1, set-2, unc-30 and lin-54 according to microarray, tiling array and RNA-seq. Affected by aldicarb, hydrogen sulfide, rotenone, …	N.A.
chrV	15512195	15512679	485	1	180044	NM_074459	WBGene00004452	rpl-38	60S ribosomal protein L38	WBGene00004452	rpl-38	Caenorhabditis elegans	protein_coding_gene	C06B8.8	CELE_C06B8.8	C06B8.8.1, C06B8.8.2, C06B8.8.3, C06B8.8.4	N.A.	CE20485	CE20485|HMMPANTHER:PTHR10965|PFAM:PF01781|INTERPRO:IPR002675|INTERPRO:IPR038464	O17570	O17570	TF300215	NM_074459.8	NP_506860.1	V 8.33 +/- 0.00	cenix:134-e12, mv_C06B8.8, sjj_C06B8.8|V-10O21	larval arrest, no induction of antimicrobial peptide expression after infection, protruding vulva, reduced brood size, sick, slow growth, sterile, sterile progeny, transposon silencing variant	N.A.	gk255943|Substitution|Missense, gk826586|Substitution|Missense, gk872153|Substitution|Missense	alg-1|Physical, ccar-1|Physical, csr-1|Physical, dep-1|Physical, hda-1|Physical, myrf-1|Physical, myrf-2|Physical, nrde-2|Physical, pan-1|Physical, pid-3|Physical, prg-1|Physical, rnf-1|Physical, sip-1|Physical, spc-1|Physical, tofu-6|Physical, zen-4|Physical	N.A.	ADA, ADE, anterior gonadal sheath cell, anterior spermatheca, AUA, body wall musculature, CEP, dorsal nerve cord, DVB, excretory gland cell, germ line, hermaphrodite distal tip cell, I4 neuron, intestine, lateral nerve cord, M cell, M1 neuron, m2L, m2R, male distal tip cell, MCL, MCR, MI neuron, nerve ring, neuron, NSM, PDB, pharynx, posterior gonadal sheath cell, Posterior spermatheca, PVC, RID,…	N.A.	1-day post-L4 adult hermaphrodite Ce, 10-days post-L4 adult hermaphrodite Ce, 2-days post-L4 adult hermaphrodite Ce, 20-days post-L4 adult hermaphrodite Ce, 3-days post-L4 adult hermaphrodite Ce, 4-cell embryo Ce, 4-days post-L4 adult hermaphrodite Ce, 6-days post-L4 adult hermaphrodite Ce, adult Ce, adult hermaphrodite Ce, adult male Ce, all stages Ce, blastula embryo Ce, dauer larva Ce, embryo …	N.A.	HGNC:10349|EnsEMBL-Compara;Hieranoid;Panther;OrthoFinder;SonicParanoid;PhylomeDB;Inparanoid;OMA;OrthoInspector	cytosolic large ribosomal subunit, ribonucleoprotein complex assembly, ribonucleoprotein complex, ribosome, structural constituent of ribosome, translation	rpl-38 encodes a large ribosomal subunit L38 protein.	Predicted to be a structural constituent of ribosome. Predicted to be involved in ribonucleoprotein complex assembly. Predicted to be located in ribosome. Predicted to be part of cytosolic large ribosomal subunit. Is an ortholog of human RPL38 (ribosomal protein L38).	Enriched in body wall musculature, vulval muscle, ventral nerve cord, nerve ring, dorsal nerve cord, somatic neuron, tail neuron, lateral nerve cord, pharynx, germ line, somatic gonad precursor, M cell, ADA, ADE, AUA, CEP, hermaphrodite distal tip cell, male distal tip cell, DVB, excretory gland cell, anterior gonadal sheath cell, posterior gonadal sheath cell, I4 neuron, M1 neuron, m2R, m2L, MCR…	WBPaper00005654|pmid12529635, WBPaper00006028|pmid12906791, WBPaper00038491|pmid21647448, WBPaper00049828|pmid27405932, WBPaper00055090|pmid30120140
chrV	11076900	11078127	1228	2	179534	NM_073417	WBGene00000064	act-2	Actin-2	WBGene00000064	act-2	Caenorhabditis elegans	protein_coding_gene	T04C12.5	act2, CELE_T04C12.5	T04C12.5.1	N.A.	CE13150	CE13150|PhosphoPep:T04C12.5|HMMPANTHER:PTHR11937:SF192|HMMPANTHER:PTHR11937|PRINTS:PR00190|SCANPROSITE:PS01132|SCANPROSITE:PS00406|SCANPROSITE:PS00432|SMART:SM00268|PFAM:PF00022|SUPERFAMILY:SSF53067|INTERPRO:IPR004000|INTERPRO:IPR043129	P10984	P10984	N.A.	NM_001383398.2	NP_001370033.1	V 2.94 +/- 0.00	cenix:222-c8, smd_T04C12.5, mv_CAA34718, sjj_T04C12.5|V-7H07	avoids bacterial lawn, body wall muscle myosin organization defective, body wall muscle sarcomere morphology variant, cytokinesis variant emb, cytoplasmic processing body variant, dead eggs laid, distal tip cell migration variant, embryonic lethal, germ cell morphology variant, growth variant, larval arrest, larval lethal, lethal, locomotion variant, maternal sterile, mitochondria alignment varia…	N.A.	gk246720|Substitution|Missense, gk246721|Substitution|Missense, gk326343|Substitution|Missense, gk470484|Substitution|Missense, gk675425|Substitution|Missense, gk682277|Substitution|Missense, gk852614|Substitution|Missense, gk920436|Substitution|Missense, or295|Substitution|Missense, or621|Substitution|Missense	act-1|Physical, act-2|Physical, act-2|Physical, act-3|Genetic, act-4|Physical, act-5|Physical, ced-3|Physical, dbn-1|Physical, erh-2|Physical, glh-1|Physical, magi-1|Physical, myrf-1|Physical, myrf-2|Physical, nrde-2|Physical, pan-1|Physical, pid-3|Physical, prg-1|Physical, smo-1|Physical, spc-1|Physical, tofu-6|Physical, zen-4|Regulatory	body wall musculature, gonad, hypodermis, neuron	AIZ, CEP, DB1, germ line, germline precursor cell, I4 neuron, NSM, PLM, rect_D, rect_VL, rect_VR, somatic gonad precursor, VB1, VB2	adult Ce, embryo Ce, L1 larva Ce, L2 larva Ce, L3 larva Ce, L4 larva Ce	1-cell embryo Ce, 1-day post-L4 adult hermaphrodite Ce, 10-days post-L4 adult hermaphrodite Ce, 2-days post-L4 adult hermaphrodite Ce, 20-days post-L4 adult hermaphrodite Ce, 3-days post-L4 adult hermaphrodite Ce, 3-fold embryo Ce, 5-days post-L4 adult hermaphrodite Ce, 6-days post-L4 adult hermaphrodite Ce, 7-10 days post-L4 adult hermaphrodite Ce, adult Ce, adult hermaphrodite Ce, adult male Ce…	hand, foot and mouth disease|By Orthology, Baraitser-Winter syndrome|By Orthology, autosomal dominant nonsyndromic deafness 20|By Orthology	HGNC:132|EnsEMBL-Compara;Hieranoid;Panther;OrthoFinder;SonicParanoid;Inparanoid;OMA;OrthoInspector, HGNC:144|EnsEMBL-Compara;Hieranoid;OrthoFinder;SonicParanoid;Inparanoid;OMA;OrthoInspector	actin filament, ATP binding, cell cortex, cortical actin cytoskeleton organization, cytoplasm, cytoskeleton, embryo development ending in birth or egg hatching, locomotion, meiosis II cytokinesis, mitotic cytokinesis, nucleotide binding	act-2 encodes one of five C. elegans actins\; act-2 functions redundantly in early embryonic cortical microfilaments with act-1 and act-3, and dominant mutations in act-2 result in uncoordinated locomotion\; an ACT-2::GFP reporter fusion is expressed in the cytoplasm of embryonic cells and is also found in contractile filaments in adult muscle cells.	Predicted to enable ATP binding activity. Involved in several processes, including cortical actin cytoskeleton organization\; cytoskeleton-dependent cytokinesis\; and embryo development. Located in actin filament and cell cortex. Expressed in body wall musculature\; gonad\; hypodermis\; and neurons. Human ortholog(s) of this gene implicated in Baraitser-Winter syndrome\; autosomal dominant nonsyn…	Enriched in NSM, PLM, germ line, germline precursor cell, somatic gonad precursor, AIZ, CEP, DB1, I4 neuron, rect_VR, rect_VL, rect_D, VB1 and VB2 according to RNA-seq and single-cell RNA-seq. Affected by feh-1, sti-1, nhr-49, daf-12, K10D11.2, let-7, gld-1, tatn-1, daf-16, npr-1, lmn-1, mir-34, glh-4, glh-1, pgl-1, pgl-3, fog-2, emb-4, sma-2, sma-4, elt-2, elt-7, smo-1, clk-1, daf-2, sod-2, pmt-…	WBPaper00000608|pmid17246100, WBPaper00000611|pmid6302275, WBPaper00000741|pmid6527380, WBPaper00000742|pmid6098683, WBPaper00000798|pmid N.A., WBPaper00000801|pmid4054096, WBPaper00000969|pmid3581169, WBPaper00001090|pmid3203906, WBPaper00001178|pmid2795655, WBPaper00001230|pmid2694942, WBPaper00001262|pmid2157142, WBPaper00001401|pmid1907494, WBPaper00001542|pmid1577199, WBPaper00001567|pmid130…
chrIV	11602652	11603217	566	1	178083	NM_069785	WBGene00004480	rps-11	40S ribosomal protein S11	WBGene00004480	rps-11	Caenorhabditis elegans	protein_coding_gene	F40F11.1	CELE_F40F11.1	F40F11.1.1	N.A.	CE05860	CE05860|PhosphoPep:F40F11.1|HMMPANTHER:PTHR10744|HMMPANTHER:PTHR10744:SF9|PRINTS:PR00973|SCANPROSITE:PS00056|TIGRFAM:TIGR03630|PFAM:PF00366|PFAM:PF16205|SUPERFAMILY:SSF50249|INTERPRO:IPR000266|INTERPRO:IPR012340|INTERPRO:IPR028333|INTERPRO:IPR032440	Q20206	Q20206	TF300126	NM_069785.8	NP_502186.1	IV 5.04	mv_F40F11.1, cenix:74-e11, sjj_F40F11.1|IV-6M09, WBPaper00038381:F40F11_1_1	apoptosis reduced, cytoplasmic processing body variant, diplotene region organization variant, early larval arrest, embryonic lethal, extended life span, fat content reduced, foraging behavior variant, germ cell compartment expansion variant, germline nuclear positioning variant, gonad vesiculated, larval arrest, maternal sterile, molt defect, nuclei small, oocyte morphology variant, oocyte numbe…	N.A.	gk407160|Substitution|Missense, gk408164|Substitution|Missense, gk595149|Substitution|Missense	cdc-48.2|Genetic, cep-1|Genetic, cey-4|Physical, cfp-1|Physical, ckb-2|Regulatory, csr-1|Physical, daf-18|Genetic, dlg-1|Physical, erh-2|Physical, glh-1|Physical, hmg-3|Physical, let-413|Physical, myrf-1|Physical, myrf-2|Physical, nmad-1|Physical, nrde-2|Physical, pan-1|Physical, pid-3|Physical, pid-5|Physical, pqn-59|Physical, prg-1|Physical, sec-6|Physical, smo-1|Physical, spc-1|Physical, tofu-…	N.A.	ADA, AFD, anterior gonadal sheath cell, anterior spermatheca, ASER, CAN, excretory cell, excretory gland cell, germ line, hermaphrodite distal tip cell, I4 neuron, M cell, m2L, m2R, male distal tip cell, MI neuron, NSM, PLM, posterior gonadal sheath cell, Posterior spermatheca, RIG, somatic gonad precursor	N.A.	1-day post-L4 adult hermaphrodite Ce, 10-days post-L4 adult hermaphrodite Ce, 11-15 days post-L4 adult hermaphrodite Ce, 16-18 days post-L4 adult hermaphrodite Ce, 2-days post-L4 adult hermaphrodite Ce, 20-days post-L4 adult hermaphrodite Ce, 3-days post-L4 adult hermaphrodite Ce, 6-days post-L4 adult hermaphrodite Ce, adult Ce, adult hermaphrodite Ce, adult male Ce, all stages Ce, blastula embry…	N.A.	HGNC:10384|EnsEMBL-Compara;Hieranoid;Panther;OrthoFinder;SonicParanoid;PhylomeDB;Inparanoid;OMA;OrthoInspector	cytosolic small ribosomal subunit, determination of adult lifespan, ribonucleoprotein complex, ribosome, structural constituent of ribosome, translation	rps-11 encodes a small ribosomal subunit S11 protein\; by homology, RPS-11 is predicted to function in protein biosynthesis\; in C. elegans, RPS-11 activity is required for embryonic and germline development, as well as the overall health of the animal\; loss of rps-11 activity in adult animals extends lifespan.	Predicted to be a structural constituent of ribosome. Involved in determination of adult lifespan. Predicted to be located in ribosome. Predicted to be part of cytosolic small ribosomal subunit. Is an ortholog of human RPS11 (ribosomal protein S11).	Enriched in AFD, ASER, PLM, germ line, somatic gonad precursor, excretory cell, M cell, ADA, CAN, hermaphrodite distal tip cell, male distal tip cell, excretory gland cell, anterior gonadal sheath cell, posterior gonadal sheath cell, I4 neuron, m2R, m2L, MI neuron, NSM, RIG, anterior spermatheca and Posterior spermatheca according to RNA-seq and single-cell RNA-seq. Affected by aak-2, atx-3, let-…	WBPaper00025088|pmid15837805, WBPaper00029008|pmid17266679, WBPaper00029254|pmid17411345, WBPaper00035215|pmid19763173, WBPaper00038491|pmid21647448, WBPaper00055090|pmid30120140, WBPaper00062388|pmid35036864
chrII	4673086	4673601	516	1	173805	NM_062424	WBGene00001976	hmg-11	HMG	WBGene00001976	hmg-11	Caenorhabditis elegans	protein_coding_gene	T05A7.4	hmg-I-alpha, CELE_T05A7.4	T05A7.4.1	N.A.	CE04890	CE04890|PhosphoPep:T05A7.4|PRINTS:PR00929|INTERPRO:IPR017956	G5EEL9	G5EEL9	N.A.	NM_062424.10	NP_494825.1	II -3.68 +/- 0.01	cenix:149-b7, sjj_T05A7.4|II-3N12, mv_T05A7.4	transgene expression reduced	N.A.	gk141293|Substitution|Missense, gk450526|Substitution|Missense, gk606925|Substitution|Missense, gk868710|Substitution|Missense	cdc-42|Physical, daf-15|Physical, dlg-1|Physical, hpl-1|Physical, let-413|Physical, myrf-2|Physical, nhr-178|Regulatory, pan-1|Physical, par-3|Physical, pgl-3|Physical, sip-1|Physical, tebp-2|Physical, unc-86|Physical	anal depressor muscle, body wall musculature, excretory cell, head, hypodermis, intestine, nerve ring, nervous system, pharynx, rectal epithelium, reproductive system, tail neuron, uterine muscle, ventral cord neuron, vulva, vulval muscle	ABalaaaala, ABalaaaarl, ABalaaaarr, ABalaapaaa, ABalaapppa, ABalaappppa, ABalapaaaa, ABalapaapa, ABalapaappa, ABalapapapa, ABalapappaa, ABalappaap, ABalappapa, ABalapppaa, ABalapppapa, ABalappppaa, ABalppapppa, ABalppppapa, ABalppppppa, ABarapppppa, ABarppaapp, ABarpppapp, ABplaapaaa, ABplaapapa, ABplapaaaa, ABplapaaaap, ABplapaaapa, ABplapappp, ABplapapppp, ABplapppaa, ABplapppapp, ABplpaaappa, …	adult Ce, larva Ce	1-cell embryo Ce, 1-day post-L4 adult hermaphrodite Ce, 10-days post-L4 adult hermaphrodite Ce, 11-15 days post-L4 adult hermaphrodite Ce, 2-days post-L4 adult hermaphrodite Ce, 3-days post-L4 adult hermaphrodite Ce, 4-cell embryo Ce, 4-days post-L4 adult hermaphrodite Ce, 5-days post-L4 adult hermaphrodite Ce, 6-days post-L4 adult hermaphrodite Ce, 7-10 days post-L4 adult hermaphrodite Ce, adult…	leiomyoma|By Orthology, ovarian cancer|By Orthology, lipoma|By Orthology, Silver-Russell syndrome|By Orthology	HGNC:5009|OMA;PhylomeDB	DNA binding	N.A.	Predicted to enable DNA binding activity. Expressed in head. Human ortholog(s) of this gene implicated in several diseases, including Silver-Russell syndrome\; leiomyoma\; and ovarian cancer. Is an ortholog of human HMGA2 (high mobility group AT-hook 2).	Enriched in pharynx, body wall musculature, vulval muscle, ventral nerve cord, nerve ring, dorsal nerve cord, somatic neuron, tail neuron, lateral nerve cord, dopaminergic neuron, hypodermis, PVD, OLL, NSM, neuron, AFD, ASER, PLM, somatic gonad precursor, sensory neuron, ABplapaaaa, ABprapaaaa, ABalaaaala, ABalaapaaa, BDUR, BDUL, ALMR, ALML, ABpraaapppa, ABalppppppa, AWAR, AWAL, ASGR, ASGL, AUAR,…	WBPaper00027309|pmid18050428, WBPaper00035567|pmid20047968, WBPaper00040135|pmid21874007, WBPaper00055090|pmid30120140, WBPaper00064064|pmid35479415
chrI	2070216	2070358	143	1	13179452	NR_049962	WBGene00197277	Y37E3.28	ncRNA	WBGene00197277	Y37E3.28	Caenorhabditis elegans	ncRNA_gene	Y37E3.28	CELE_Y37E3.28	Y37E3.28	N.A.	N.A.	N.A.	N.A.	N.A.	N.A.	NR_049962.1	N.A.	I -11.950340	N.A.	N.A.	N.A.	N.A.	N.A.	N.A.	N.A.	N.A.	N.A.	N.A.	N.A.	N.A.	N.A.	Is affected by prg-1 and cep-1 based on RNA-seq studies. Is affected by silicon dioxide nanoparticle based on microarray studies.	Affected by prg-1 and cep-1 according to RNA-seq. Affected by silicon dioxide nanoparticle according to microarray.	N.A.
chrII	6587967	6588640	674	2	174090	NM_062935	WBGene00002045	icd-1	Transcription factor BTF3 homolog	WBGene00002045	icd-1	Caenorhabditis elegans	protein_coding_gene	C56C10.8	CELE_C56C10.8	C56C10.8.1	CEOP2252	CE02573	CE02573|PhosphoPep:C56C10.8|HMMPANTHER:PTHR10351|PFSCAN:PS51151|SMART:SM01407|PFAM:PF01849|INTERPRO:IPR002715|INTERPRO:IPR038187|INTERPRO:IPR039370	Q18885	Q18885	TF317546	NM_062935.10	NP_495336.1	II -0.11 +/- 0.00	cenix:83-c12, mv_C56C10.8, sjj_C56C10.8|II-5I03	accumulated germline cell corpses, apoptosis increased, apoptosis variant, cell death variant, cell degeneration, clear, developmental morphology variant, distal tip cell migration variant, embryonic lethal, embryonic morphology variant, ER stress response variant, general pace of development defective early emb, gonad development variant, gut granules enlarged, intestinal development variant, lo…	larval arrest, lethal, phasmid socket absent, sterile	gk145269|Substitution|Missense, gk145270|Substitution|Missense, gk337532|Substitution|Missense	icd-2|Physical;Regulatory, aak-2|Physical, bar-1|Genetic, cdc-42|Physical, cdc-48.1|Physical, cdc-48.2|Physical, ced-4|Genetic, ced-9|Genetic, clk-2|Genetic, csr-1|Physical, cyn-1|Physical, cyn-3|Physical, cyn-5|Physical, cyn-7|Physical, daf-2|Genetic, dlg-1|Physical, eef-1A.1|Physical, eef-2|Physical, egl-15|Genetic, eif-3.B|Physical, F45D3.2|Physical, hsf-1|Genetic, hsp-110|Physical, hsp-12.2|P…	germ line, hypodermis, intestinal cell, intestine, muscle cell, nerve ring, pharynx, preanal ganglion, ventral nerve cord	anterior spermatheca, CAN, germ line, I4 neuron, intestine, M cell, NSM, Posterior spermatheca, sensory neuron, somatic gonad precursor	adult Ce, embryo Ce, L1 larva Ce, L2 larva Ce, L3 larva Ce, L4 larva Ce	1-cell embryo Ce, 1-day post-L4 adult hermaphrodite Ce, 10-days post-L4 adult hermaphrodite Ce, 11-15 days post-L4 adult hermaphrodite Ce, 2-days post-L4 adult hermaphrodite Ce, 2-fold embryo Ce, 20-days post-L4 adult hermaphrodite Ce, 3-days post-L4 adult hermaphrodite Ce, 3-fold embryo Ce, 4-days post-L4 adult hermaphrodite Ce, 6-days post-L4 adult hermaphrodite Ce, 7-10 days post-L4 adult herm…	N.A.	HGNC:1125|EnsEMBL-Compara;Hieranoid;Panther;OrthoFinder;SonicParanoid;Inparanoid;OMA;OrthoInspector, HGNC:30547|Hieranoid;Panther;OrthoFinder;SonicParanoid;PhylomeDB;Inparanoid;OMA;OrthoInspector	cytoplasm, cytosol, embryo development ending in birth or egg hatching, mitochondrion, nascent polypeptide-associated complex, negative regulation of apoptotic process, nucleus, polysomal ribosome, protein binding	icd-1 encodes the C. elegans ortholog of the beta-subunit of the nascent polypeptide-associated complex (betaNAC)\; during development, icd-1 activity is required for prevention of ced-4-dependent, but ced-3-independent, programmed cell death and for normal embryonic development\; ICD-1 is widely expressed throughout development and colocalizes primarily with mitochondria.	Involved in embryo development and negative regulation of apoptotic process. Located in mitochondrion. Expressed in several structures, including germ line\; intestine\; pharynx\; preanal ganglion\; and somatic nervous system. Is an ortholog of human BTF3 (basic transcription factor 3) and BTF3L4 (basic transcription factor 3 like 4).	Enriched in NSM, germ line, somatic gonad precursor, sensory neuron, M cell, CAN, I4 neuron, anterior spermatheca, Posterior spermatheca and intestine according to RNA-seq, single-cell RNA-seq and microarray. Affected by age-1, atx-3, daf-12, unc-120, let-7, gld-1, alg-3, alg-4, tatn-1, clk-1, lin-35, jmjd-3.1, jmjd-1.2, hsf-1, lin-28, mir-34, glp-1, glh-4, glh-1, pgl-1, pgl-3, sma-2, sma-4, smo-…	WBPaper00006037|pmid12944970, WBPaper00006118|pmid14505566, WBPaper00006383|pmid14744432, WBPaper00006509|pmid15066636, WBPaper00016599|pmid N.A., WBPaper00019407|pmid N.A., WBPaper00024004|pmid N.A., WBPaper00024062|pmid N.A., WBPaper00024063|pmid N.A., WBPaper00024064|pmid N.A., WBPaper00025854|pmid N.A., WBPaper00026454|pmid N.A., WBPaper00026462|pmid N.A., WBPaper00026483|pmid N.A., WBPaper00…
chrV	7804667	7804812	146	2	13213793	NR_069036	WBGene00195454	ZK742.8	ncRNA	WBGene00195454	ZK742.8	Caenorhabditis elegans	ncRNA_gene	ZK742.8	CELE_ZK742.8	ZK742.8	N.A.	N.A.	N.A.	N.A.	N.A.	N.A.	NR_069036.1	N.A.	V 0.910633	N.A.	N.A.	N.A.	N.A.	N.A.	N.A.	N.A.	N.A.	N.A.	N.A.	N.A.	N.A.	N.A.	Is affected by klf-1 based on RNA-seq studies.	Affected by klf-1 according to RNA-seq.	N.A.
chrIII	5273989	5274756	768	2	175727	NM_065725	WBGene00022599	daf-41	Co-chaperone protein daf-41	WBGene00022599	daf-41	Caenorhabditis elegans	protein_coding_gene	ZC395.10	CELE_ZC395.10	ZC395.10.1	CEOP3276	CE01436	CE01436|HMMPANTHER:PTHR22932|HMMPANTHER:PTHR22932:SF1|PFSCAN:PS51203|PFAM:PF04969|SUPERFAMILY:SSF49764|INTERPRO:IPR007052|INTERPRO:IPR008978|INTERPRO:IPR045250	Q23280	Q23280	TF315077	NM_065725.5	NP_498126.1	III -1.85	TH:303B10, sjj_ZC395.10|III-2D16, mv_ZC395.10, cenix:303-b10	antibody subcellular localization variant, body wall muscle sarcomere morphology variant, embryonic lethal, maternal sterile, organism development variant, paralyzed	chemotaxis variant, dauer constitutive, temperature influenced life span variant, thermotolerance increased	ok3015|Deletion|Frameshift, gk174387|Substitution|Missense, gk174388|Substitution|Missense, gk572734|Substitution|Missense, gk730115|Substitution|Missense, gk799191|Substitution|Missense, gk853552|Substitution|Missense, gk903565|Substitution|Missense	bar-1|Genetic, ccar-1|Physical, hsp-90|Physical, ins-10|Regulatory, ins-11|Regulatory, ins-12|Regulatory, ins-13|Regulatory, ins-17|Regulatory, ins-18|Regulatory, ins-1|Regulatory, ins-27|Regulatory, ins-37|Regulatory, ins-5|Regulatory, ins-7|Regulatory, pid-2|Physical, pid-5|Physical, rde-8|Physical, sec-6|Physical, smo-1|Physical, unc-45|Genetic	ADLL, ADLR, amphid neuron, anal depressor muscle, ASEL, ASER, ASIL, ASIR, AWCL, AWCR, body wall musculature, Cell, head neuron, intestine, nervous system, pharynx, phasmid neuron, reproductive system, seam cell, tail neuron, touch receptor neuron, ventral cord neuron, vulva, vulval muscle	ABarppaapp, ABarpppapp, ABplaapappp, ABplapaaaap, ABpraapappp, ABprapaaaap, ASGL, ASGR, ASIL, ASIR, AWAL, AWAR, AWCL, AWCR, DB1, FLP, germ line, I4 neuron, intestine, neuron, NSM, PDE, somatic gonad precursor	adult Ce, larva Ce	1-day post-L4 adult hermaphrodite Ce, 2-days post-L4 adult hermaphrodite Ce, 3-days post-L4 adult hermaphrodite Ce, 3-fold embryo Ce, 5-days post-L4 adult hermaphrodite Ce, 6-days post-L4 adult hermaphrodite Ce, 7-10 days post-L4 adult hermaphrodite Ce, adult Ce, adult hermaphrodite Ce, adult male Ce, all stages Ce, blastula embryo Ce, dauer larva Ce, embryo Ce, L1 larva Ce, L2 larva Ce, L2d larv…	breast cancer|By Orthology, atherosclerosis|By Orthology, oligodendroglioma|By Orthology	HGNC:16049|EnsEMBL-Compara;Hieranoid;Panther;OrthoFinder;Inparanoid;OMA;OrthoInspector	chaperone binding, chaperone-mediated protein complex assembly, cytosol, Hsp90 protein binding, myofibril, nucleus, protein folding	N.A.	Predicted to enable Hsp90 protein binding activity and chaperone binding activity. Predicted to be involved in chaperone-mediated protein complex assembly and protein folding. Located in myofibril. Expressed in several structures, including amphid neurons\; anal depressor muscle\; phasmid neurons\; touch receptor neurons\; and vulva. Human ortholog(s) of this gene implicated in atherosclerosis\; …	Enriched in FLP, germ line, somatic gonad precursor, ASGR, ASGL, AWAR, AWAL, ASIR, ASIL, ABpraapappp, ABplaapappp, AWCR, AWCL, ABprapaaaap, ABplapaaaap, ABarppaapp, ABarpppapp, DB1, I4 neuron, NSM, PDE, intestine and neuron according to microarray, RNA-seq and single-cell RNA-seq. Affected by aak-2, tatn-1, clk-1, hsf-1, mir-34, glp-1, glh-4, glh-1, pgl-1, pgl-3, emb-4, sma-2, sma-4, hsp-90, smo-…	WBPaper00035925|pmid20149226, WBPaper00036580|pmid N.A., WBPaper00037655|pmid20880838, WBPaper00038444|pmid21611156, WBPaper00038491|pmid21647448, WBPaper00039064|pmid N.A., WBPaper00040294|pmid21983200, WBPaper00046427|pmid25659154, WBPaper00046600|pmid25830239, WBPaper00046852|pmid25988162, WBPaper00049828|pmid27405932, WBPaper00055090|pmid30120140, WBPaper00057962|pmid N.A., WBPaper00059745|pm…
chrI	1832897	1834746	1850	1	171749	NR_151555	WBGene00016907	C53H9.2	CP-type G domain-containing protein	WBGene00016907	C53H9.2	Caenorhabditis elegans	protein_coding_gene	C53H9.2	CELE_C53H9.2	C53H9.2b, C53H9.2c, C53H9.2d, C53H9.2e, C53H9.2a.1	CEOP1024	CE39907	CE39907|HMMPANTHER:PTHR45709:SF2|HMMPANTHER:PTHR45709|PFSCAN:PS51721|PFAM:PF01926|SUPERFAMILY:SSF52540|INTERPRO:IPR006073|INTERPRO:IPR027417|INTERPRO:IPR043358	O01826	O01826	TF105747	NR_131349.1, NR_131348.1, NR_151555.1, NR_131350.1, NM_170804.6	NP_740787.2	I -12.681930	N.A.	avoids bacterial lawn, cytoplasmic processing body variant, embryonic lethal, larval arrest, maternal sterile, nuclear position defective early emb, pattern of transgene expression variant, protruding vulva, RAB-11 recycling endosome morphology variant, receptor mediated endocytosis defective, slow growth, sterile, transgene expression reduced, transgene subcellular localization variant	lethal	gk103883|Substitution|Missense, gk316168|Substitution|Missense, gk372881|Substitution|Missense, gk376007|Substitution|Missense, gk403760|Substitution|Missense, gk447695|Substitution|Missense, gk539172|Substitution|Missense, gk562102|Substitution|Missense, gk680145|Substitution|Missense, gk754178|Substitution|Missense, gk827145|Substitution|Missense, gk861921|Substitution|Missense, gk897573|Substi…	enri-2|Physical	N.A.	germ line, intestine, M cell, somatic gonad precursor	N.A.	1-day post-L4 adult hermaphrodite Ce, 10-days post-L4 adult hermaphrodite Ce, 2-days post-L4 adult hermaphrodite Ce, 20-days post-L4 adult hermaphrodite Ce, 3-days post-L4 adult hermaphrodite Ce, 4-cell embryo Ce, 6-days post-L4 adult hermaphrodite Ce, adult Ce, adult hermaphrodite Ce, adult male Ce, all stages Ce, blastula embryo Ce, dauer larva Ce, embryo Ce, L1 larva Ce, L2 larva Ce, L2d larva…	N.A.	HGNC:25652|EnsEMBL-Compara;Hieranoid;Panther;OrthoFinder;SonicParanoid;PhylomeDB;OrthoInspector	cytosol, GTP binding, GTPase activity, nucleotide binding, ribosomal subunit export from nucleus	C53H9.2 encodes at least three protein isoforms orthologous to the GTP-binding proteins human GNL1 (HSR1\; OMIM:143024) and murine MMR1, as well as LSG1 in S. cerevisiae and many other eukaryotic and bacterial proteins\; one alternative transcription unit of the C53H9.2 locus, C53H9.2a, has a natural nonsense transcript that is up-regulated in vivo by smg[-] mutations, indicating that C53H9.2 is …	Predicted to enable GTPase activity. Predicted to be involved in ribosomal subunit export from nucleus. Predicted to be located in cytosol. Is an ortholog of human LSG1 (large 60S subunit nuclear export GTPase 1).	Enriched in germ line, somatic gonad precursor, M cell and intestine according to RNA-seq, single-cell RNA-seq and microarray. Affected by cyc-1, aak-2, daf-12, smg-2, let-7, gld-1, tatn-1, tcer-1, rsks-1, npr-1, jmjd-3.1, mir-34, glp-1, glh-4, glh-1, pgl-1, pgl-3, emb-4, sma-2, sma-4, adr-2, daf-2, aak-1, nmad-1, iff-1, sin-3, cfp-1, sftb-1, mrps-5, atp-2, let-418, spr-1, sir-2.1, lin-14 and lin…	WBPaper00038491|pmid21647448, WBPaper00041771|pmid23195953, WBPaper00048759|pmid26564951, WBPaper00055090|pmid30120140, WBPaper00055848|pmid30514206
chrIV	7925457	7926371	915	2	177583	NM_068921	WBGene00004471	rps-2	40S ribosomal protein S2	WBGene00004471	rps-2	Caenorhabditis elegans	protein_coding_gene	C49H3.11	CELE_C49H3.11	C49H3.11.1, C49H3.11.2	N.A.	CE04237	CE04237|PhosphoPep:C49H3.11|HMMPANTHER:PTHR13718|HMMPANTHER:PTHR13718:SF93|PFSCAN:PS50881|SCANPROSITE:PS00585|TIGRFAM:TIGR01020|PFAM:PF00333|PFAM:PF03719|SUPERFAMILY:SSF54211|SUPERFAMILY:SSF54768|INTERPRO:IPR000851|INTERPRO:IPR005324|INTERPRO:IPR005711|INTERPRO:IPR013810|INTERPRO:IPR014721|INTERPRO:IPR020568	P51403	P51403	TF300806	NM_068921.6	NP_501322.1	IV 3.50 +/- 0.00	cenix:27-g3, sjj_C49H3.11|IV-4C21, mv_C49H3.11	apoptosis reduced, cytoplasmic processing body variant, development phenotype, diplotene absent during oogenesis, diplotene region organization variant, early larval arrest, embryonic lethal, germ cell compartment anucleate, germ cell compartment expansion variant, gonad morphology variant, gonad vesiculated, larval arrest, lysosome-related organelle morphology variant, maternal sterile, mRNA sur…	N.A.	gk206338|Substitution|Missense, gk206340|Substitution|Missense, gk389070|Substitution|Missense, gk481522|Substitution|Missense, gk507041|Substitution|Missense, gk549235|Substitution|Missense, gk595140|Substitution|Missense, gk636267|Substitution|Missense, gk844243|Substitution|Missense, gk849473|Substitution|Missense, gk932619|Substitution|Missense	cep-1|Genetic, cfp-1|Physical, csr-1|Physical, elks-1|Physical, hsp-16.2|Physical, hsp-6|Regulatory, icd-1|Physical, mars-1|Physical, myrf-1|Physical, myrf-2|Physical, nrde-2|Physical, pan-1|Physical, pid-3|Physical, pqn-59|Physical, prg-1|Physical, pri-1|Physical, sec-6|Physical, sip-1|Physical, sma-4|Physical, smo-1|Physical, spc-1|Physical, tofu-6|Physical, wago-1|Physical	N.A.	anterior spermatheca, CAN, excretory cell, excretory gland cell, germ line, hermaphrodite distal tip cell, M cell, m2L, m2R, male distal tip cell, Posterior spermatheca, RIG, somatic gonad precursor	N.A.	1-cell embryo Ce, 1-day post-L4 adult hermaphrodite Ce, 10-days post-L4 adult hermaphrodite Ce, 11-15 days post-L4 adult hermaphrodite Ce, 14-days post-L4 adult hermaphrodite Ce, 15-days post-L4 adult hermaphrodite Ce, 16-18 days post-L4 adult hermaphrodite Ce, 2-days post-L4 adult hermaphrodite Ce, 20-days post-L4 adult hermaphrodite Ce, 3-days post-L4 adult hermaphrodite Ce, 6-days post-L4 adul…	N.A.	HGNC:10404|EnsEMBL-Compara;Hieranoid;Panther;OrthoFinder;SonicParanoid;PhylomeDB;Inparanoid;OMA;OrthoInspector	cytosolic small ribosomal subunit, ribonucleoprotein complex, ribosome, RNA binding, small ribosomal subunit, structural constituent of ribosome, translation	rps-2 encodes a small ribosomal subunit S2 protein.	Predicted to be a structural constituent of ribosome. Predicted to be involved in translation. Predicted to be located in ribosome. Predicted to be part of cytosolic small ribosomal subunit. Is an ortholog of human RPS2 (ribosomal protein S2).	Enriched in germ line, somatic gonad precursor, excretory cell, M cell, CAN, hermaphrodite distal tip cell, male distal tip cell, excretory gland cell, m2R, m2L, RIG, anterior spermatheca and Posterior spermatheca according to RNA-seq and single-cell RNA-seq. Affected by daf-2, let-7, gld-1, pept-1, lin-35, hsf-1, dep-1, glh-4, glh-1, pgl-1, pgl-3, atm-1, emb-4, sma-2, lin-22, isp-1, pfd-6, nhl-2…	WBPaper00025088|pmid15837805, WBPaper00035215|pmid19763173, WBPaper00038491|pmid21647448, WBPaper00049490|pmid27067626, WBPaper00049828|pmid27405932, WBPaper00055090|pmid30120140
chrII	11125461	11126353	893	2	174699	NM_063983	WBGene00004478	rps-9	40S ribosomal protein S9	WBGene00004478	rps-9	Caenorhabditis elegans	protein_coding_gene	F40F8.10	CELE_F40F8.10	F40F8.10.1	N.A.	CE05849	CE05849|HMMPANTHER:PTHR11831|HMMPANTHER:PTHR11831:SF23|PFSCAN:PS50889|SCANPROSITE:PS00632|SMART:SM01390|TIGRFAM:TIGR01018|PFAM:PF01479|PFAM:PF00163|SUPERFAMILY:SSF55174|INTERPRO:IPR001912|INTERPRO:IPR002942|INTERPRO:IPR005710|INTERPRO:IPR022801|INTERPRO:IPR036986	Q20228	Q20228	TF300795	NM_063983.6	NP_496384.1	II 3.32 +/- 0.00	sjj_F40F8.10|II-7N11, mv_F40F8.10, WBPaper00038381:F40F8_1_1, cenix:58-d5	adult lethal, apoptosis fails to occur, apoptosis reduced, cell membrane organization biogenesis variant, development phenotype, diplotene absent during oogenesis, dumpy, early larval arrest, embryonic lethal, extended life span, germ cell compartment expansion absent, germ cell compartment expansion variant, gonad morphology variant, gonad small, gonad vesiculated, larval arrest, larval lethal, …	N.A.	gk154498|Substitution|Missense, gk425662|Substitution|Missense, gk449448|Substitution|Missense, gk503257|Substitution|Missense, gk745331|Substitution|Missense, gk758531|Substitution|Missense, gk897233|Substitution|Missense	atx-2|Physical, cep-1|Genetic, csr-1|Physical, elks-1|Physical, glh-1|Physical, lec-1|Physical, myrf-1|Physical, myrf-2|Physical, nrde-2|Physical, pan-1|Physical, pid-3|Physical, prg-1|Physical, sec-6|Physical, sip-1|Physical, smo-1|Physical, spc-1|Physical, tost-1|Physical	N.A.	ADA, anterior gonadal sheath cell, anterior spermatheca, excretory cell, excretory gland cell, germ line, hermaphrodite distal tip cell, I4 neuron, intestine, M cell, m2L, m2R, male distal tip cell, MCL, MCR, MI neuron, NSM, PDB, posterior gonadal sheath cell, Posterior spermatheca, Psub1, RIG, RIH, somatic gonad precursor	N.A.	1-day post-L4 adult hermaphrodite Ce, 10-days post-L4 adult hermaphrodite Ce, 11-15 days post-L4 adult hermaphrodite Ce, 14-days post-L4 adult hermaphrodite Ce, 15-days post-L4 adult hermaphrodite Ce, 16-18 days post-L4 adult hermaphrodite Ce, 2-cell embryo Ce, 2-days post-L4 adult hermaphrodite Ce, 20-days post-L4 adult hermaphrodite Ce, 24-cell embryo Ce, 3-days post-L4 adult hermaphrodite Ce, …	N.A.	HGNC:10442|EnsEMBL-Compara;Hieranoid;Panther;OrthoFinder;SonicParanoid;PhylomeDB;Inparanoid;OMA;OrthoInspector	cytosolic small ribosomal subunit, positive regulation of translational fidelity, ribonucleoprotein complex, ribosome, RNA binding, rRNA binding, small ribosomal subunit, structural constituent of ribosome, translation	rps-9 encodes a small ribosomal subunit S9 protein.	Predicted to enable rRNA binding activity. Predicted to be a structural constituent of ribosome. Predicted to be involved in positive regulation of translational fidelity. Predicted to be located in ribosome. Predicted to be part of cytosolic small ribosomal subunit. Is an ortholog of human RPS9 (ribosomal protein S9).	Enriched in Psub1, germ line, somatic gonad precursor, excretory cell, M cell, ADA, hermaphrodite distal tip cell, male distal tip cell, excretory gland cell, anterior gonadal sheath cell, posterior gonadal sheath cell, I4 neuron, m2R, m2L, MCR, MCL, MI neuron, NSM, PDB, RIG, RIH, anterior spermatheca, Posterior spermatheca and intestine according to RNA-seq, single-cell RNA-seq and microarray. A…	WBPaper00004651|pmid11231151, WBPaper00005654|pmid12529635, WBPaper00032502|pmid19151087, WBPaper00035215|pmid19763173, WBPaper00035228|pmid19805813, WBPaper00035925|pmid20149226, WBPaper00038491|pmid21647448, WBPaper00049828|pmid27405932, WBPaper00055090|pmid30120140, WBPaper00061547|pmid34166401, WBPaper00062388|pmid35036864
chrII	1322713	1322835	123	2	13183554	NR_050837	WBGene00197171	F56D12.10	ncRNA	WBGene00197171	F56D12.10	Caenorhabditis elegans	ncRNA_gene	F56D12.10	CELE_F56D12.10	F56D12.10	N.A.	N.A.	N.A.	N.A.	N.A.	N.A.	NR_050837.1	N.A.	II -15.495600	N.A.	N.A.	N.A.	N.A.	N.A.	N.A.	N.A.	N.A.	N.A.	N.A.	N.A.	N.A.	N.A.	Is affected by several genes including cep-1\; egl-9\; and ahr-1 based on RNA-seq studies. Is affected by silicon dioxide nanoparticle based on microarray studies.	Affected by ahr-1, cep-1, egl-9 and mrps-5 according to RNA-seq. Affected by silicon dioxide nanoparticle according to microarray.	N.A.
chrIV	4659696	4660200	505	2	177231	NM_068208	WBGene00017925	F29B9.11	Uncharacterized protein	WBGene00017925	F29B9.11	Caenorhabditis elegans	protein_coding_gene	F29B9.11	CELE_F29B9.11	F29B9.11.1	CEOP4132	N.A.	N.A.	Q9GYI1	Q9GYI1	N.A.	NM_001383083.2	NP_001370686.1	IV 0.614910	N.A.	embryonic lethal, fat content reduced, general pace of development defective early emb, growth rate variant, larval arrest, reduced brood size, slow growth, sterile, sterile progeny, transgene expression increased, transgene expression reduced	N.A.	gk421395|Substitution|Missense, gk531613|Substitution|Missense, gk536328|Substitution|Missense, gk557209|Substitution|Missense, gk723591|Substitution|Missense	hsp-6|Regulatory	N.A.	AFD, anterior gonadal sheath cell, ASER, germ line, intestine, neuron, NSM, posterior gonadal sheath cell	N.A.	1-day post-L4 adult hermaphrodite Ce, 2-days post-L4 adult hermaphrodite Ce, 3-days post-L4 adult hermaphrodite Ce, 4-days post-L4 adult hermaphrodite Ce, 6-days post-L4 adult hermaphrodite Ce, 7-10 days post-L4 adult hermaphrodite Ce, adult Ce, adult hermaphrodite Ce, adult male Ce, all stages Ce, embryo Ce, L1 larva Ce, L2 larva Ce, L2d larva Ce, L3 larva Ce, L4 larva Ce, oocyte-laying stage ad…	N.A.	N.A.	integral component of membrane, membrane	N.A.	Predicted to be located in membrane. Predicted to be integral component of membrane.	Enriched in NSM, AFD, ASER, germ line, anterior gonadal sheath cell, posterior gonadal sheath cell, intestine and neuron according to RNA-seq, single-cell RNA-seq and microarray. Affected by cyc-1, aak-2, csr-1, lin-35, jmjd-3.1, jmjd-1.2, hsf-1, lin-28, sma-2, sma-4, lin-22, nuo-6, pry-1, atf-7, aak-1, iff-1, cfp-1, set-6, baz-2, lag-1, unc-30, sir-2.1 and ahr-1 according to microarray and RNA-s…	N.A.
chrIII	1950676	1951369	694	1	175338	NM_065080	WBGene00004491	rps-22	Ribosomal Protein, Small subunit	WBGene00004491	rps-22	Caenorhabditis elegans	protein_coding_gene	F53A3.3	CELE_F53A3.3	F53A3.3a.1, F53A3.3a.2, F53A3.3a.3, F53A3.3b.1, F53A3.3b.2	CEOP3845	CE10884, CE41657	CE10884|HMMPANTHER:PTHR11758|HMMPANTHER:PTHR11758:SF34|SCANPROSITE:PS00053|PFAM:PF00410|SUPERFAMILY:SSF56047|INTERPRO:IPR000630|INTERPRO:IPR035987, CE41657|HMMPANTHER:PTHR11758:SF34|HMMPANTHER:PTHR11758|SCANPROSITE:PS00053|PFAM:PF00410|SUPERFAMILY:SSF56047|INTERPRO:IPR000630|INTERPRO:IPR035987	A8WIR1, O17218	O17218	TF300067	NM_001393289.1, NM_001373852.4	NP_001359806.1, NP_001379589.1	III -15.73 +/- 0.01	mv_F53A3.3, cenix:326-d11, TH:326d11, sjj_F53A3.3|III-1O10	avoids bacterial lawn, cytoplasmic processing body variant, developmental delay postembryonic, early larval arrest, embryonic lethal, extended life span, larval arrest, lysosome-related organelle morphology variant, maternal sterile, molt defect, mRNA surveillance defective, nonsense mRNA accumulation, organism heat response variant, patchy coloration, pathogen resistance increased, pleiotropic d…	N.A.	gk167754|Substitution|Missense, gk405439|Substitution|Missense, gk534640|Substitution|Missense, h15153|Substitution|Missense	myrf-1|Physical;Regulatory, atx-2|Physical, cdc-42|Physical, cep-1|Genetic, csr-1|Physical, dlg-1|Physical, glh-1|Physical, let-413|Physical, lgl-1|Physical, mafr-1|Physical, malt-1|Physical, myrf-2|Physical, nmad-1|Physical, nrde-2|Physical, pan-1|Physical, par-3|Physical, pid-3|Physical, pid-5|Physical, prg-1|Physical, sec-6|Physical, sip-1|Physical, spc-1|Physical, tost-1|Physical, wago-1|Phys…	head neuron, hypodermis, intestine, nervous system, pharynx, tail neuron, ventral cord neuron	anterior spermatheca, ASER, CAN, excretory gland cell, germ line, hermaphrodite distal tip cell, I4 neuron, intestine, M cell, m2L, m2R, male distal tip cell, muscle cell, NSM, Posterior spermatheca, Psub1, RIG, RIH, somatic gonad precursor, XXXL, XXXR	adult Ce, larva Ce	1-day post-L4 adult hermaphrodite Ce, 10-days post-L4 adult hermaphrodite Ce, 11-15 days post-L4 adult hermaphrodite Ce, 2-cell embryo Ce, 2-days post-L4 adult hermaphrodite Ce, 20-days post-L4 adult hermaphrodite Ce, 3-days post-L4 adult hermaphrodite Ce, 3-fold embryo Ce, 4-cell embryo Ce, 6-days post-L4 adult hermaphrodite Ce, 7-10 days post-L4 adult hermaphrodite Ce, adult Ce, adult hermaphro…	Diamond-Blackfan anemia 20|By Orthology	HGNC:10389|EnsEMBL-Compara;Hieranoid;Panther;OrthoFinder;SonicParanoid;PhylomeDB;Inparanoid;OMA;OrthoInspector	cytosolic small ribosomal subunit, determination of adult lifespan, ribonucleoprotein complex, ribosome, structural constituent of ribosome, translation	rps-22 encodes a small ribosomal subunit S15a protein.	Predicted to be a structural constituent of ribosome. Involved in determination of adult lifespan. Predicted to be located in ribosome. Predicted to be part of cytosolic small ribosomal subunit. Human ortholog(s) of this gene implicated in Diamond-Blackfan anemia 20. Is an ortholog of human RPS15A (ribosomal protein S15a).	Enriched in intestine, Psub1, ASER, germ line, somatic gonad precursor, M cell, CAN, hermaphrodite distal tip cell, male distal tip cell, excretory gland cell, I4 neuron, m2R, m2L, NSM, RIG, RIH, anterior spermatheca, Posterior spermatheca, XXXR, XXXL and muscle cell according to Chronogram analysis, RNA-seq, single-cell RNA-seq and microarray. Affected by cyc-1, aak-2, atx-3, tdp-1, lin-35, hsf-…	WBPaper00025088|pmid15837805, WBPaper00029008|pmid17266679, WBPaper00032230|pmid18824511, WBPaper00035215|pmid19763173, WBPaper00035228|pmid19805813, WBPaper00038491|pmid21647448, WBPaper00040293|pmid21989027, WBPaper00042599|pmid N.A., WBPaper00055090|pmid30120140, WBPaper00062341|pmid34849797
chrIV	4749179	4749769	591	2	24104384	NM_001307285	WBGene00004432	rpl-20	60S ribosomal protein L18a	WBGene00004432	rpl-20	Caenorhabditis elegans	protein_coding_gene	E04A4.8	E04A4.a, E04A4.a, CELE_E04A4.8	E04A4.8.1	CEOP4148	CE21392	CE21392|HMMPANTHER:PTHR10052:SF1|HMMPANTHER:PTHR10052|PIRSF:PIRSF002190|PFAM:PF01775|SUPERFAMILY:SSF160374|INTERPRO:IPR021138|INTERPRO:IPR023573|INTERPRO:IPR028877	O44480	O44480	TF300086	NM_001307285.5	NP_001294214.1	IV 0.82 +/- 0.02	cenix:83-g9, sjj_Y17G9B.e|IV-2O16, sjj_Y17G9B.f, sjj_E04A4.8|IV-2O06, mv_E04A4.a, smd_Y17G9B.e	apoptosis reduced, avoids bacterial lawn, cell membrane organization biogenesis variant, diplotene region organization variant, embryonic lethal, germ cell compartment expansion variant, germ cell compartment morphology variant, gonad vesiculated, larval arrest, larval lethal, lysosome-related organelle morphology variant, maternal sterile, oocyte number decreased, pachytene region organization v…	N.A.	gk200749|Substitution|Missense, gk642128|Substitution|Missense, gk678533|Substitution|Missense, gk743557|Substitution|Missense, gk778098|Substitution|Missense, gk841338|Substitution|Missense, gk845565|Substitution|Missense	cfp-1|Physical, csr-1|Physical, erh-2|Physical, glh-1|Physical, hmg-3|Physical, mafr-1|Physical, myrf-1|Physical, myrf-2|Physical, nmad-1|Physical, nrde-2|Physical, pan-1|Physical, pid-3|Physical, pid-5|Physical, pqn-59|Physical, prg-1|Physical, sip-1|Physical, smo-1|Physical, spc-1|Physical, tofu-6|Physical, tost-1|Physical, wago-1|Physical	N.A.	anterior spermatheca, body wall musculature, CAN, dorsal nerve cord, excretory cell, excretory gland cell, germ line, hermaphrodite distal tip cell, I4 neuron, intestine, lateral nerve cord, M cell, m2L, m2R, male distal tip cell, nerve ring, neuron, NSM, PDB, pharynx, Posterior spermatheca, RIG, RIH, somatic gonad precursor, somatic neuron, tail neuron, ventral nerve cord, vulval muscle	N.A.	1-day post-L4 adult hermaphrodite Ce, 10-days post-L4 adult hermaphrodite Ce, 11-15 days post-L4 adult hermaphrodite Ce, 14-days post-L4 adult hermaphrodite Ce, 15-days post-L4 adult hermaphrodite Ce, 16-18 days post-L4 adult hermaphrodite Ce, 2-days post-L4 adult hermaphrodite Ce, 20-days post-L4 adult hermaphrodite Ce, 3-days post-L4 adult hermaphrodite Ce, 3-fold embryo Ce, 5-days post-L4 adul…	N.A.	HGNC:10311|EnsEMBL-Compara;Hieranoid;Panther;OrthoFinder;SonicParanoid;PhylomeDB;Inparanoid;OMA;OrthoInspector	cytosolic large ribosomal subunit, ribonucleoprotein complex, ribosome, structural constituent of ribosome, translation	rpl-20 encodes a large ribosomal subunit L18a protein.	Predicted to be a structural constituent of ribosome. Predicted to be involved in translation. Predicted to be located in ribosome. Predicted to be part of cytosolic large ribosomal subunit. Is an ortholog of human RPL18A (ribosomal protein L18a).	Enriched in germ line, ventral nerve cord, body wall musculature, vulval muscle, nerve ring, dorsal nerve cord, somatic neuron, tail neuron, lateral nerve cord, pharynx, somatic gonad precursor, excretory cell, M cell, CAN, hermaphrodite distal tip cell, male distal tip cell, excretory gland cell, I4 neuron, m2R, m2L, NSM, PDB, RIG, RIH, anterior spermatheca, Posterior spermatheca, intestine and …	WBPaper00004540|pmid11137018, WBPaper00005356|pmid12124626, WBPaper00005654|pmid12529635, WBPaper00024704|pmid15654727, WBPaper00025088|pmid15837805, WBPaper00028451|pmid16943775, WBPaper00035228|pmid19805813, WBPaper00038491|pmid21647448, WBPaper00049828|pmid27405932, WBPaper00055090|pmid30120140
chrV	7854250	7854959	710	2	24104286	NR_102038	WBGene00219659	anr-36	ncRNA	WBGene00219659	anr-36	Caenorhabditis elegans	antisense_lncRNA_gene	C37C3.15	CELE_C37C3.15	C37C3.15	N.A.	N.A.	N.A.	N.A.	N.A.	N.A.	NR_102038.1	N.A.	V 0.92	N.A.	N.A.	N.A.	N.A.	N.A.	N.A.	AVK, sensory neuron	N.A.	1-day post-L4 adult hermaphrodite Ce, 2-days post-L4 adult hermaphrodite Ce, 4-days post-L4 adult hermaphrodite Ce, 6-days post-L4 adult hermaphrodite Ce, blastula embryo Ce, embryo Ce, L1 larva Ce, L2d larva Ce, L3 larva Ce	N.A.	N.A.	N.A.	N.A.	Enriched in AVK and sensory neurons based on RNA-seq studies. Is affected by several genes including sek-1\; cep-1\; and set-2 based on RNA-seq studies. Is affected by graphene oxide based on RNA-seq studies.	Enriched in AVK and sensory neuron according to RNA-seq. Affected by cep-1, hrpr-1, sek-1, spc-1, ints-4, sin-3 and set-2 according to RNA-seq. Affected by graphene oxide according to RNA-seq.	N.A.
chrI	12652385	12652405	21	1	13182556	NR_050653	WBGene00168505	21ur-12279	ncRNA	WBGene00168505	21ur-12279	Caenorhabditis elegans	piRNA_gene	H28O16.3	CELE_H28O16.3	H28O16.3	N.A.	N.A.	N.A.	N.A.	N.A.	N.A.	NR_050653.1	N.A.	I 13.88	N.A.	N.A.	N.A.	gk882827|Substitution|Missense	N.A.	N.A.	N.A.	N.A.	N.A.	N.A.	N.A.	N.A.	N.A.	N.A.	N.A.	N.A.
chrI	13652992	13653204	213	2	173235	NM_060991	WBGene00004445	rpl-31	60S ribosomal protein L31	WBGene00004445	rpl-31	Caenorhabditis elegans	protein_coding_gene	W09C5.6	CELE_W09C5.6	W09C5.6a.1, W09C5.6b.1	N.A.	CE20168, CE20169	CE20168|PhosphoPep:W09C5.6a|HMMPANTHER:PTHR10956|HMMPANTHER:PTHR10956:SF4|SCANPROSITE:PS01144|SMART:SM01380|PFAM:PF01198|SUPERFAMILY:SSF54575|INTERPRO:IPR000054|INTERPRO:IPR023621, CE20169|HMMPANTHER:PTHR10956:SF4|HMMPANTHER:PTHR10956|SCANPROSITE:PS01144|SMART:SM01380|PFAM:PF01198|SUPERFAMILY:SSF54575|INTERPRO:IPR000054|INTERPRO:IPR023621	Q9U332	Q9U332	TF314858	NM_060990.8, NM_001381248.1	NP_001366969.1, NP_493391.1	I 21.64 +/- 0.00	mv_W09C5.6a, mv_W09C5.6b, cenix:76-d6, cenix:118-a6, sjj_W09C5.6, sjj2_W09C5.6a|I-9N07, WBPaper00038381:W09C5_1_1	apoptosis fails to occur, apoptosis reduced, avoids bacterial lawn, diplotene absent during oogenesis, embryonic lethal, extended life span, germ cell compartment expansion absent, germ cell compartment expansion variant, gonad small, gonad vesiculated, larval arrest, larval lethal, maternal sterile, molt defect, no oocytes, nuclei small, oocyte number decreased, pachytene progression during ooge…	N.A.	gk680480|Substitution|Missense	cey-4|Physical, hcp-3|Physical, hda-1|Physical, hsp-6|Regulatory, icd-1|Physical, lin-53|Physical, mars-1|Physical, myrf-1|Physical, myrf-2|Physical, nrde-2|Physical, pid-2|Physical, pid-3|Physical, prg-1|Physical, sec-6|Physical, spc-1|Physical, swsn-2.2|Physical, tofu-6|Physical	body wall musculature, hypodermis, intestine, pharynx	ADA, AFD, anterior spermatheca, ASER, body wall musculature, CAN, excretory gland cell, germ line, hermaphrodite distal tip cell, I4 neuron, intestine, M cell, M1 neuron, m2L, m2R, male distal tip cell, NSM, OLL, pharynx, PLM, Posterior spermatheca, Psub1, PVD, RIG, RIH, somatic gonad precursor, XXXL, XXXR	adult Ce, larva Ce	1-day post-L4 adult hermaphrodite Ce, 10-days post-L4 adult hermaphrodite Ce, 2-cell embryo Ce, 2-days post-L4 adult hermaphrodite Ce, 20-days post-L4 adult hermaphrodite Ce, 3-days post-L4 adult hermaphrodite Ce, 3-fold embryo Ce, 5-days post-L4 adult hermaphrodite Ce, 6-days post-L4 adult hermaphrodite Ce, adult Ce, adult hermaphrodite Ce, adult male Ce, all stages Ce, blastula embryo Ce, dauer…	N.A.	HGNC:10334|EnsEMBL-Compara;Hieranoid;Panther;OrthoFinder;SonicParanoid;PhylomeDB;Inparanoid;OMA;OrthoInspector	cytoplasmic translation, cytosolic large ribosomal subunit, ribonucleoprotein complex, ribosome, structural constituent of ribosome, translation	rpl-31 encodes a large ribosomal subunit L31 protein.	Predicted to be a structural constituent of ribosome. Predicted to be involved in cytoplasmic translation. Predicted to be located in ribosome. Predicted to be part of cytosolic large ribosomal subunit. Is an ortholog of human RPL31 (ribosomal protein L31).	Enriched in intestine, body wall musculature, pharynx, PVD, OLL, Psub1, AFD, ASER, PLM, germ line, somatic gonad precursor, M cell, ADA, CAN, hermaphrodite distal tip cell, male distal tip cell, excretory gland cell, I4 neuron, M1 neuron, m2R, m2L, NSM, RIG, RIH, anterior spermatheca, Posterior spermatheca, XXXR and XXXL according to Chronogram analysis, microarray, RNA-seq and single-cell RNA-se…	WBPaper00024924|pmid15687263, WBPaper00025088|pmid15837805, WBPaper00038491|pmid21647448, WBPaper00049828|pmid27405932, WBPaper00055090|pmid30120140
chrII	10872912	10873691	780	1	174675	NM_063937	WBGene00010333	copz-1	putative coatomer subunit zeta	WBGene00010333	copz-1	Caenorhabditis elegans	protein_coding_gene	F59E10.3	CELE_F59E10.3	F59E10.3.1	CEOP2508	CE11494	CE11494|HMMPANTHER:PTHR11043|HMMPANTHER:PTHR11043:SF0|SCANPROSITE:PS00989|PFAM:PF01217|SUPERFAMILY:SSF64356|INTERPRO:IPR011012|INTERPRO:IPR022775|INTERPRO:IPR039652	O17901	O17901	TF300262	NM_063937.4	NP_496338.1	II 3.13	sjj_F59E10.3|II-7F09, WBPaper00038381:F59E10_1_1, cenix:210-b11, mv_F59E10.3	adult lethal, apoptosis reduced, cell membrane organization biogenesis variant, cell secretion variant, clear, diakinesis progression during oogenesis variant, diplotene region organization variant, embryonic lethal, germ cell compartment expansion variant, germ cell compartment multinucleate, larval lethal, maternal sterile, molt defect, multiple nuclei oocyte, nuclear appearance variant, oocyte…	N.A.	gk153901|Substitution|Missense, gk608493|Substitution|Missense, gk809012|Substitution|Missense, gk844744|Substitution|Missense	smo-1|Physical, zen-4|Physical	N.A.	ASER, dopaminergic neuron, germ line, head mesodermal cell, hypodermis, intestine, OLL, PLM, PVD	N.A.	1-day post-L4 adult hermaphrodite Ce, 10-days post-L4 adult hermaphrodite Ce, 2-days post-L4 adult hermaphrodite Ce, 20-days post-L4 adult hermaphrodite Ce, 3-days post-L4 adult hermaphrodite Ce, 5-days post-L4 adult hermaphrodite Ce, 6-days post-L4 adult hermaphrodite Ce, 7-10 days post-L4 adult hermaphrodite Ce, adult Ce, adult hermaphrodite Ce, adult male Ce, all stages Ce, blastula embryo Ce,…	N.A.	HGNC:2243|Hieranoid;Panther;OrthoFinder;SonicParanoid;PhylomeDB;Inparanoid;OMA;OrthoInspector, HGNC:19356|EnsEMBL-Compara;Panther;OrthoFinder;SonicParanoid;PhylomeDB;Inparanoid;OMA;OrthoInspector	COPI vesicle coat, COPI-coated vesicle membrane, cytoplasm, cytoplasmic vesicle, embryo development ending in birth or egg hatching, Golgi apparatus, Golgi membrane, intra-Golgi vesicle-mediated transport, intracellular protein transport, membrane, oocyte development, protein transport, retrograde vesicle-mediated transport, Golgi to endoplasmic reticulum, vesicle-mediated transport	F59E10.3 encodes a zeta subunit of the coatomer (COPI) complex\; in mass RNAi assays, F59E10.3 is required for embryonic, larval, and adult viability, for fertility, and for normal osmoregulation.	Involved in embryo development\; intracellular protein transport\; and oocyte development. Predicted to be located in COPI-coated vesicle membrane and Golgi membrane. Predicted to be part of COPI vesicle coat. Is an ortholog of human COPZ1 (COPI coat complex subunit zeta 1) and COPZ2 (COPI coat complex subunit zeta 2).	Enriched in dopaminergic neuron, hypodermis, PVD, OLL, ASER, PLM, germ line, head mesodermal cell and intestine according to tiling array, RNA-seq, single-cell RNA-seq and microarray. Affected by lin-39, daf-12, htz-1, npr-1, cox-5B, jmjd-3.1, mir-34, emb-4, pmt-2, aak-1, aak-2, iff-1, cfp-1, mrps-5, set-6, baz-2, egl-43, bcat-1, unc-30, smo-1, sir-2.1, alg-1 and tdp-1 according to RNA-seq, tilin…	WBPaper00003831|pmid10588660, WBPaper00035228|pmid19805813, WBPaper00038491|pmid21647448, WBPaper00055090|pmid30120140
chrI	13952178	13953145	968	1	173260	NM_001276652	WBGene00004475	rps-6	40S ribosomal protein S6	WBGene00004475	rps-6	Caenorhabditis elegans	protein_coding_gene	Y71A12B.1	CELE_Y71A12B.1	Y71A12B.1a.1, Y71A12B.1c.1	N.A.	CE24592, CE47695	CE24592|PhosphoPep:Y71A12B.1a|HMMPANTHER:PTHR11502|HMMPANTHER:PTHR11502:SF6|PIRSF:PIRSF002129|SMART:SM01405|PFAM:PF01092|INTERPRO:IPR001377|INTERPRO:IPR014401, CE47695|HMMPANTHER:PTHR11502:SF6|HMMPANTHER:PTHR11502|SMART:SM01405|PFAM:PF01092|INTERPRO:IPR001377	Q9NEN6, I2HAF9	Q9NEN6	N.A.	NM_001276653.3, NM_061034.9	NP_493435.1, NP_001263582.1	I 22.39 +/- 0.02	sjj2_Y71A12B.1|I-9G15, WBPaper00038381:Y71A12B_1_1, cenix:77-h2, mv_G_YK1606	apoptosis fails to occur, apoptosis reduced, avoids bacterial lawn, cell membrane organization biogenesis variant, chromosome condensation variant, diplotene absent during oogenesis, diplotene region organization variant, extended life span, germ cell compartment expansion variant, germ cell compartment morphology variant, gonad vesiculated, larval lethal, maternal sterile, molt defect, oocyte mo…	N.A.	gk606871|Substitution|Missense, gk958193|Substitution|Missense	calm-1|Physical, cey-4|Physical, cfp-1|Physical, cra-1|Physical, csr-1|Physical, dep-1|Physical, dve-1|Physical, erh-2|Physical, glh-1|Physical, icd-1|Physical, lec-1|Physical, lgg-1|Physical, mars-1|Physical, met-2|Physical, mfap-1|Physical, myrf-1|Physical, myrf-2|Physical, nrde-2|Physical, pan-1|Physical, pid-3|Physical, pid-5|Physical, prg-1|Physical, rpb-9|Physical, rpl-24.1|Physical, sec-6|…	N.A.	anterior spermatheca, CAN, excretory gland cell, germ line, hermaphrodite distal tip cell, M cell, m2L, m2R, male distal tip cell, Posterior spermatheca, Psub1, RIG, somatic gonad precursor	N.A.	1-cell embryo Ce, 1-day post-L4 adult hermaphrodite Ce, 11-15 days post-L4 adult hermaphrodite Ce, 14-days post-L4 adult hermaphrodite Ce, 15-days post-L4 adult hermaphrodite Ce, 16-18 days post-L4 adult hermaphrodite Ce, 2-cell embryo Ce, 2-days post-L4 adult hermaphrodite Ce, 3-days post-L4 adult hermaphrodite Ce, 5-days post-L4 adult hermaphrodite Ce, 6-days post-L4 adult hermaphrodite Ce, adu…	N.A.	HGNC:10429|EnsEMBL-Compara;Hieranoid;Panther;SonicParanoid;PhylomeDB;Inparanoid;OMA;OrthoInspector	determination of adult lifespan, ribonucleoprotein complex, ribosome, structural constituent of ribosome, translation	rps-6 encodes a small (40S) ribosomal subunit S6 protein\; loss of rps-6 activity in adult animals extends lifespan.	Predicted to be a structural constituent of ribosome. Involved in determination of adult lifespan. Predicted to be located in ribosome. Is an ortholog of human RPS6 (ribosomal protein S6).	Enriched in Psub1, germ line, somatic gonad precursor, M cell, CAN, hermaphrodite distal tip cell, male distal tip cell, excretory gland cell, m2R, m2L, RIG, anterior spermatheca and Posterior spermatheca according to RNA-seq and single-cell RNA-seq. Affected by cyc-1, atx-3, daf-2, daf-16, lec-1, lbp-5, dep-1, glh-4, glh-1, pgl-1, pgl-3, emb-4, isp-1, pry-1, pfd-6, nhl-2, erh-2, pid-3, tofu-6, t…	WBPaper00004651|pmid11231151, WBPaper00029008|pmid17266679, WBPaper00037448|pmid N.A., WBPaper00038491|pmid21647448, WBPaper00041328|pmid22829783, WBPaper00043089|pmid N.A., WBPaper00049828|pmid27405932, WBPaper00055090|pmid30120140, WBPaper00056909|pmid31214513, WBPaper00064064|pmid35479415
chrI	8728588	8728708	121	2	13181245	NR_050329	WBGene00198377	C36B1.16	ncRNA	WBGene00198377	C36B1.16	Caenorhabditis elegans	ncRNA_gene	C36B1.16	CELE_C36B1.16	C36B1.16	N.A.	N.A.	N.A.	N.A.	N.A.	N.A.	NR_050329.1	N.A.	I 3.037660	N.A.	N.A.	N.A.	N.A.	N.A.	N.A.	N.A.	N.A.	N.A.	N.A.	N.A.	N.A.	N.A.	N.A.	N.A.	N.A.
chrIV	1659704	1659956	253	1	176975	NM_067714	WBGene00004497	rps-28	40S ribosomal protein S28	WBGene00004497	rps-28	Caenorhabditis elegans	protein_coding_gene	Y41D4B.5	CELE_Y41D4B.5	Y41D4B.5.1	CEOP4640	CE21842	CE21842|PhosphoPep:Y41D4B.5|HMMPANTHER:PTHR10769|HMMPANTHER:PTHR10769:SF3|SCANPROSITE:PS00961|PFAM:PF01200|SUPERFAMILY:SSF50249|INTERPRO:IPR000289|INTERPRO:IPR012340	Q95Y04	Q95Y04	TF300136	NM_001383043.2	NP_001370541.1	IV -16.25 +/- 0.01	sjj_Y41D4A_3613.a|IV-8D21, cenix:189-b5, WBPaper00038381:Y41D4B_1_1	apoptosis reduced, avoids bacterial lawn, cytoplasmic processing body variant, diplotene region organization variant, germ cell compartment expansion variant, germ cell development variant, germline nuclear positioning variant, gonad development variant, gonad vesiculated, larval arrest, late larval arrest, male gonad development variant, male somatic gonad development variant, maternal sterile, …	N.A.	N.A.	csr-1|Physical, dve-1|Physical, myrf-1|Physical, myrf-2|Physical, nrde-2|Physical, pan-1|Physical, pid-3|Physical, prg-1|Physical, sec-6|Physical, sip-1|Physical, spc-1|Physical, tofu-6|Physical, wago-1|Physical	N.A.	ADE, anterior gonadal sheath cell, anterior spermatheca, excretory gland cell, germ line, hermaphrodite distal tip cell, I4 neuron, intestine, M cell, M1 neuron, m2L, m2R, male distal tip cell, MI neuron, neuron, NSM, OLL, PDB, posterior gonadal sheath cell, Posterior spermatheca, PVD, RID, RIG, RIH, somatic gonad precursor, URB	N.A.	1-day post-L4 adult hermaphrodite Ce, 11-15 days post-L4 adult hermaphrodite Ce, 2-days post-L4 adult hermaphrodite Ce, 3-days post-L4 adult hermaphrodite Ce, 3-fold embryo Ce, 4-cell embryo Ce, 4-days post-L4 adult hermaphrodite Ce, 5-days post-L4 adult hermaphrodite Ce, 6-days post-L4 adult hermaphrodite Ce, adult Ce, adult hermaphrodite Ce, adult male Ce, all stages Ce, blastula embryo Ce, dau…	Diamond Blackfan anemia 15 with mandibulofacial dysostosis|By Orthology	HGNC:10418|EnsEMBL-Compara;Hieranoid;Panther;OrthoFinder;SonicParanoid;PhylomeDB;Inparanoid;OMA;OrthoInspector	cytoplasm, cytoplasmic side of rough endoplasmic reticulum membrane, cytoplasmic translation, cytosol, cytosolic small ribosomal subunit, endoplasmic reticulum, maturation of SSU-rRNA, polysomal ribosome, ribonucleoprotein complex, ribosomal small subunit assembly, ribosome, rough endoplasmic reticulum, structural constituent of ribosome, translation	rps-28 encodes a small ribosomal subunit S28 protein.	Predicted to be a structural constituent of ribosome. Predicted to be involved in cytoplasmic translation\; maturation of SSU-rRNA\; and ribosomal small subunit assembly. Predicted to be located in cytoplasmic side of rough endoplasmic reticulum membrane. Predicted to be part of cytosolic small ribosomal subunit and polysomal ribosome. Human ortholog(s) of this gene implicated in Diamond Blackfan…	Enriched in germ line, PVD, OLL, somatic gonad precursor, M cell, ADE, hermaphrodite distal tip cell, male distal tip cell, excretory gland cell, anterior gonadal sheath cell, posterior gonadal sheath cell, I4 neuron, M1 neuron, m2R, m2L, MI neuron, NSM, PDB, RID, RIG, RIH, anterior spermatheca, Posterior spermatheca, URB, intestine and neuron according to proteomic study, tiling array, RNA-seq, …	WBPaper00035149|pmid19703296, WBPaper00038491|pmid21647448, WBPaper00049828|pmid27405932, WBPaper00055090|pmid30120140, WBPaper00062388|pmid35036864
chrIII	12905496	12906405	910	1	176707	NM_067280	WBGene00012553	cox-5A	Cytochrome c oxidase subunit 5A, mitochondrial	WBGene00012553	cox-5A	Caenorhabditis elegans	protein_coding_gene	Y37D8A.14	cco-2, CELE_Y37D8A.14	Y37D8A.14.1	N.A.	CE20218	CE20218|HMMPANTHER:PTHR14200|HMMPANTHER:PTHR14200:SF11|PFAM:PF02284|SUPERFAMILY:SSF48479|INTERPRO:IPR003204|INTERPRO:IPR036545	P55954	P55954	TF105062	NM_067280.8	NP_499681.1	III 19.57 +/- 0.14	sjj_Y37D8A.14|III-6O10, mv_Y37D8A.14, TH:325D9, cenix:325-d9	avoids bacterial lawn, embryonic lethal, enzyme activity reduced, extended life span, foraging behavior variant, larval arrest, mitochondrial metabolism variant, reduced brood size, shortened life span, slow growth, sterile progeny, transgene expression increased	N.A.	gk189347|Substitution|Missense, gk189349|Substitution|Missense, gk189350|Substitution|Missense, gk372466|Substitution|Missense, gk575030|Substitution|Missense	akir-1|Physical, cox-6C|Physical, daf-2|Regulatory, dlg-1|Physical, glh-1|Physical, gst-4|Regulatory, hsp-6|Regulatory, myrf-1|Physical, myrf-2|Physical, pid-3|Physical, sip-1|Physical, smo-1|Physical, spe-39|Physical, tbb-6|Regulatory, vps-45|Physical, zen-4|Physical	N.A.	anterior gonadal sheath cell, anterior spermatheca, hermaphrodite distal tip cell, HSN, intestine, male distal tip cell, posterior gonadal sheath cell, Posterior spermatheca	N.A.	1-day post-L4 adult hermaphrodite Ce, 10-days post-L4 adult hermaphrodite Ce, 11-15 days post-L4 adult hermaphrodite Ce, 2-days post-L4 adult hermaphrodite Ce, 20-days post-L4 adult hermaphrodite Ce, 3-days post-L4 adult hermaphrodite Ce, 3-fold embryo Ce, 6-days post-L4 adult hermaphrodite Ce, 7-10 days post-L4 adult hermaphrodite Ce, adult Ce, adult hermaphrodite Ce, adult male Ce, all stages C…	cytochrome-c oxidase deficiency disease|By Orthology	HGNC:2267|EnsEMBL-Compara;Hieranoid;Panther;OrthoFinder;SonicParanoid;PhylomeDB;Inparanoid;OrthoInspector	membrane, metal ion binding, mitochondrial electron transport, cytochrome c to oxygen, mitochondrial inner membrane, mitochondrial respiratory chain complex IV, mitochondrion, oxidative phosphorylation	cco-2 encodes the C. elegans ortholog of the cytochrome c oxidase (COX) subunit Va (COX Va)\; loss of cco-2 activity via RNAi results in a shortened life span, reduced fertility, and defects in mitochondrial respiratory chain function.	Predicted to enable metal ion binding activity. Involved in mitochondrial electron transport, cytochrome c to oxygen. Predicted to be located in mitochondrial inner membrane. Predicted to be part of mitochondrial respiratory chain complex IV. Human ortholog(s) of this gene implicated in cytochrome-c oxidase deficiency disease. Is an ortholog of human COX5A (cytochrome c oxidase subunit 5A).	Enriched in hermaphrodite distal tip cell, male distal tip cell, anterior gonadal sheath cell, posterior gonadal sheath cell, HSN, anterior spermatheca, Posterior spermatheca and intestine according to single-cell RNA-seq and microarray. Affected by daf-12, rsr-2, daf-2, let-7, gld-1, cox-5B, jmjd-3.1, jmjd-1.2, hsf-1, dep-1, emb-4, lin-22, smo-1, nuo-6, akir-1, ints-5, smn-1, pid-3, klf-1, mrps-…	WBPaper00026715|pmid16103914, WBPaper00030741|pmid17543485, WBPaper00031194|pmid17998274, WBPaper00032427|pmid19074434, WBPaper00038491|pmid21647448, WBPaper00049828|pmid27405932, WBPaper00055090|pmid30120140
[truncated: 293 more rows]

## Sheet: cluster2_genes
seqnames	geneStart	geneEnd	geneLength	geneStrand	geneId	transcriptId	ENSEMBL	SYMBOL	GENENAME	WormBase.Gene.ID	Public.Name	Species	Biotype	Sequence.Name	Other.Name	Transcript	Operon	WormPep	Protein.Domain	UniProt	Reference.UniProt.ID	TreeFam	RefSeq_mRNA	RefSeq_protein	Genetic.Map.Position	RNAi.Clone	RNAi.Phenotype.Observed	Allele.Phenotype.Observed	Coding_exon.Non_silent.Allele	Interacting.Gene	Expr_pattern.Tissue	Genomic.Study.Tissue	Expr_pattern.LifeStage	Genomic.Study.LifeStage	Disease.Info	Human.Ortholog	Gene.Ontology.Association	Concise.Description	Automated.Description	Expression.Cluster.Summary	Reference
[truncated: 1,047 more rows]

## Sheet: cluster3_genes
seqnames	geneStart	geneEnd	geneLength	geneStrand	geneId	transcriptId	ENSEMBL	SYMBOL	GENENAME	WormBase.Gene.ID	Public.Name	Species	Biotype	Sequence.Name	Other.Name	Transcript	Operon	WormPep	Protein.Domain	UniProt	Reference.UniProt.ID	TreeFam	RefSeq_mRNA	RefSeq_protein	Genetic.Map.Position	RNAi.Clone	RNAi.Phenotype.Observed	Allele.Phenotype.Observed	Coding_exon.Non_silent.Allele	Interacting.Gene	Expr_pattern.Tissue	Genomic.Study.Tissue	Expr_pattern.LifeStage	Genomic.Study.LifeStage	Disease.Info	Human.Ortholog	Gene.Ontology.Association	Concise.Description	Automated.Description	Expression.Cluster.Summary	Reference
[truncated: 1,496 more rows]

## Sheet: README
Supplemental_File_2. Spreadsheet with lists of genes in each Cluster 1, 2, and 3 that exhibit different patterns of H3K4me2/3 remodeling.
